# Supplementary material
Source: PubMed Central journal article supplement (PMC3718277)

| <b>Content</b>                                                                                                  | <b>Page number</b> |
|-----------------------------------------------------------------------------------------------------------------|--------------------|
| <b>General</b>                                                                                                  | S2                 |
| <b>Ligands synthesis and Characterization</b>                                                                   | S2                 |
| <b>Synthesis and Characterization of Gold Complexes</b>                                                         | S3                 |
| <b>General procedure for Synthesis L<sub>9</sub></b>                                                            | S11                |
| <b>General procedure for Synthesis L<sub>10</sub></b>                                                           | S12                |
| <b>Condition A: General procedure for gold-catalyzed synthesis of <math>\alpha</math>-carboxymethyl ketones</b> | S13                |
| <b>Condition B: General procedure for synthesis (<i>E</i>)-4-phenyl-2-(prop-1-enyl)oxazole in one pot</b>       | S22                |
| <b>Condition C: General procedure for synthesis 3-phenylfuran-2(5H)-one from 2-oxo-2-ethyl 2-phenylacetates</b> | S23                |
| <b>Single crystal X-ray structure report</b>                                                                    | S27                |
| <b><sup>1</sup>H, <sup>13</sup>C NMR and <sup>31</sup>P spectra of Ligand and products</b>                      | S36                |

**General.** Ethyl acetate (ACS grade), hexanes (ACS grade), diethyl ether (ACS grade) and anhydrous 1, 2-dichloroethane (HPLC grade) were purchased from Fisher Scientific and used without further purification. Chlorobenzene (HPLC grade) was purchased from Acros without further purification. Methylene chloride and tetrahydrofuran were purified using MBraun Solvent Purifier. Commercially available reagents were used without further purification. Reactions were monitored by thin layer chromatography (TLC) using Sorbent Technologies' pre-coated silica gel plates. Flash column chromatography was performed over Sorbent Technologies' silica gel (230-400 mesh). <sup>1</sup>H NMR and <sup>13</sup>C NMR spectra were recorded on Varian 400 MHz, 500 MHz and 600 MHz spectrometers using residue solvent peaks as internal standards. Infrared spectra were recorded with a Perkin Elmer FT-IR spectrum 2000 spectrometer and are reported in reciprocal centimeter (cm<sup>-1</sup>). Mass spectra were recorded with Micromass QTOF<sub>2</sub> Quadrupole/Time-of-Flight Tandem mass spectrometer using electron spray ionization or Waters GCT Premier time-of-flight mass spectrometer with a field ionization (FI) ion source.

### Ligands synthesis and Characterization:

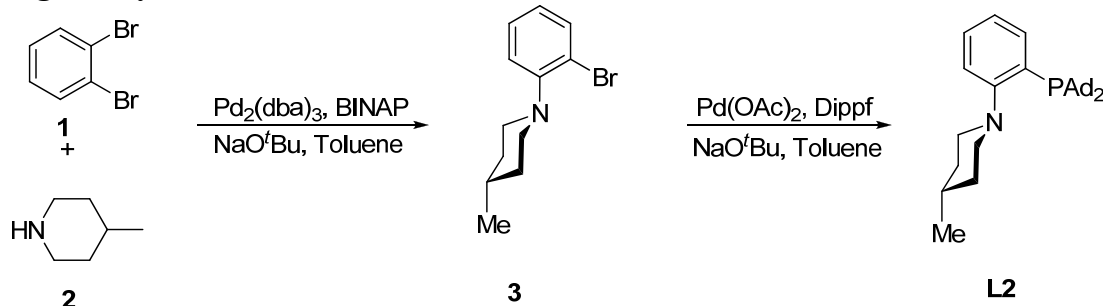

In a Schlenk tube, it was charged with reagents: Pd<sub>2</sub>dba<sub>3</sub> (46 mg, 5 mol% Pd), BINAP (93 mg, 7.5 mol %), NaO<sup>t</sup>Bu (231 mg, 2.4 mmol, 1.2 equiv), 1,2-dibromobenzene **1** (2.0 mmol), and 4-methylpiperidine **2** (2.0 mmol, 1.0 equiv). Toluene (5 mL) and stir bar were added. Then, the reaction system was stirred in an oil bath at 80 °C for 15h under N<sub>2</sub>. Upon completion, the mixture was concentrated and the residue was purified by chromatography on silica gel (eluent: hexanes/ethyl acetate) to afford the desired product **3** in 65% yield.

In a Schlenk tube, Pd(OAc)<sub>2</sub> (typically 3 mol%) and DiPPF [1,1'-bis(diisopropylphosphino)ferrocene; Pd:L ~ 1:1.2], di(1-adamantyl)phosphine (1.2mmol) and NaO<sup>t</sup>Bu(1.44mmol), followed by the addition of the aryl halide **3**(1.2mmol) in 6mL toluene; the Schlenk tube was then degassed twice. The resulting mixture was heated at 110 °C until

complete consumption of the phosphine was achieved, as judged on the basis of  $^{31}\text{P}$  NMR data. The solution was then cooled and filtered through a plug of silica, which in turn was washed with  $\text{CH}_2\text{Cl}_2$ . Removal of the solvent from the combined eluent afforded product in 65% yield that was further purified by recrystallization or by washing with appropriate solvents (*vide infra*). All ligands were worked up in air and were found to be stable when handled on the bench top.

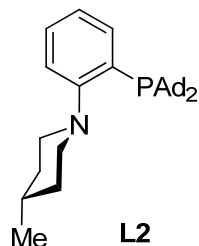

**L<sub>2</sub>** Prepared by the coupling of  $(1\text{-Ad})_2\text{PH}$  and *1-(2-bromophenyl)-4-methylpiperidine* via the standard procedure employing 3 mol% Pd and 3.6 mol% ligand in 65% yield as a white solid.  $^1\text{H}$  NMR ( $\text{CDCl}_3$ ):  $^1\text{H}$  NMR (500 MHz, Chloroform-d)  $\delta$  7.68 (dt,  $J = 7.6, 1.3$  Hz, 1H), 7.28 – 7.24 (m, 1H), 7.05 (ddd,  $J = 8.0, 4.5, 1.2$  Hz, 1H), 6.99 (td,  $J = 7.4, 1.2$  Hz, 1H), 3.26 (d,  $J = 10.0$  Hz, 2H), 2.61 (t,  $J = 10.6$  Hz, 2H), 1.99 – 1.86 (m, 18H), 1.70-1.66 (m, 12H), 1.61 (d,  $J = 8.6$  Hz, 2H), 1.48 – 1.40 (m, 3H), 0.99 (d,  $J = 5.4$  Hz, 3H).  $^{13}\text{C}$  NMR (126 MHz, Chloroform-d)  $\delta$  160.97 (d,  $J_{\text{PC}} = 21.1$  Hz), 137.27 (d,  $J_{\text{PC}} = 3.2$  Hz), 131.49 (d,  $J_{\text{PC}} = 26.8$  Hz), 129.09, 121.37, 120.22 (d,  $J_{\text{PC}} = 3.7$  Hz), 54.00 (d,  $J_{\text{PC}} = 5.7$  Hz), 41.88 (d,  $J_{\text{PC}} = 13.5$  Hz), 37.12, 36.65 (d,  $J_{\text{PC}} = 27.8$  Hz), 34.47, 30.75, 28.98 (d,  $J_{\text{PC}} = 8.4$  Hz), 22.10.  $^{31}\text{P}$  NMR (162 MHz, Chloroform-d)  $\delta$  21.67. IR( $\text{cm}^{-1}$ ): 2847, 1581, 1452, 1380, 1342, 1300, 1262, 1215, 918, 767. MS (ESI/[M+H] $^+$ ): 476.35.

### Synthesis and Characterization of Gold Complexes:

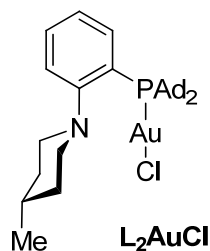

This complex was prepared quantitatively by stirring the ligand with an equivalent of  $\text{Me}_2\text{SAuCl}$  followed by simple concentration under vacuum.  $^1\text{H}$  NMR (500 MHz, Chloroform-d)  $\delta$  7.78 – 7.71 (m, 1H), 7.60 – 7.51 (m, 2H), 7.29-7.26 (m, 1H), 2.89 – 2.70 (m, 4H), 2.37 (qd,  $J = 12.2, 4.4$  Hz, 2H), 2.20 (d,  $J = 11.6$  Hz, 6H), 2.15 – 2.07 (m, 6H), 2.02 – 1.93 (m, 6H), 1.67 (s, 12H), 1.61 – 1.45 (m, 3H), 1.10 (d,  $J = 6.4$  Hz, 3H).  $^{13}\text{C}$  NMR (126 MHz, Chloroform-d)  $\delta$  160.82 (d,

$J_{PC} = 7.0$  Hz), 134.89 , 132.27 , 126.69 (d,  $J_{PC} = 4.8$  Hz), 124.31 (d,  $J_{PC} = 6.7$  Hz), 122.31 (d,  $J_{PC} = 47.4$  Hz), 56.11 , 42.14 (d,  $J_{PC} = 3.1$  Hz), 41.88 (d,  $J_{PC} = 23.6$  Hz), 36.31 (d,  $J_{PC} = 1.3$  Hz), 33.35 , 31.06 , 28.58 (d,  $J_{PC} = 9.9$  Hz), 21.29 .  $^{31}\text{P}$  NMR (162 MHz, Chloroform-d)  $\delta$  53.71. IR ( $\text{cm}^{-1}$ ):2906, 2850, 1451, 1301, 1262, 935. MS (ESI/[M+Na] $^{+}$ ) :730.21.

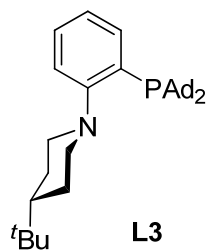

**L<sub>3</sub>** Prepared by the coupling of (1-Ad)<sub>2</sub>PH and *1-(2-bromophenyl)-4-tert-butylpiperidine* via the standard procedure employing 3 mol% Pd and 3.6 mol% ligand in 52% yield as a white solid.  $^1\text{H}$  NMR (500 MHz, Chloroform-d)  $\delta$  7.68 (d,  $J = 7.5$  Hz, 1H), 7.31 – 7.21 (m, 1H), 7.03 (dd,  $J = 7.9, 4.5$  Hz, 1H), 6.98 (t,  $J = 7.4$  Hz, 1H), 3.39 (d,  $J = 9.6$  Hz, 2H), 2.56 (t,  $J = 10.9$  Hz, 2H), 2.00 – 1.86 (m, 18H), 1.68-1.63 (m, 14H), 1.50 (qd,  $J = 12.2, 3.6$  Hz, 2H), 1.06 (ddd,  $J = 12.4, 9.0, 3.5$  Hz, 1H), 0.91 (s, 9H).  $^{13}\text{C}$  NMR (126 MHz, Chloroform-d)  $\delta$  160.83 (d,  $J_{PC} = 21.0$  Hz), 137.27 (d,  $J_{PC} = 3.1$  Hz), 131.36 (d,  $J_{PC} = 27.3$  Hz), 129.08 , 121.26 , 120.01 (d,  $J_{PC} = 3.8$  Hz), 54.65 (d,  $J_{PC} = 6.2$  Hz), 46.50 , 41.92 (d,  $J_{PC} = 13.5$  Hz), 37.13 , 36.70 (d,  $J_{PC} = 27.9$  Hz), 32.30 , 28.99 (d,  $J_{PC} = 8.4$  Hz), 27.51 , 26.98 .  $^{31}\text{P}$  NMR (162 MHz, Chloroform-d)  $\delta$  21.59. IR( $\text{cm}^{-1}$ ):2901, 2847, 1580, 1449, 1301, 1277, 1245, 1047, 937. MS (ESI/[M+H] $^{+}$ ):518.38.

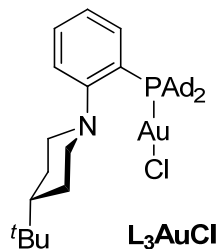

This complex was prepared quantitatively by stirring the ligand with an equivalent of Me<sub>2</sub>SAuCl followed by simple concentration under vacuum.  $^1\text{H}$  NMR (500 MHz, Chloroform-d)  $\delta$  7.75 (t,  $J = 7.3$  Hz, 1H), 7.62 (dd,  $J = 8.1, 4.6$  Hz, 1H), 7.55 (t,  $J = 7.4$  Hz, 1H), 7.27 (t,  $J = 7.4$  Hz, 1H), 2.94 (d,  $J = 10.9$  Hz, 2H), 2.76 (t,  $J = 10.6$  Hz, 2H), 2.25 – 2.17 (m, 8H), 2.13-2.11 (m, 6H), 1.99-1.97 (m, 6H), 1.70-1.64 (m, 14H), 1.11 (t,  $J = 11.9$  Hz, 1H), 0.97 (s, 9H).  $^{13}\text{C}$  NMR (126 MHz, Chloroform-d)  $\delta$  160.89 (d,  $J_{PC} = 7.2$  Hz), 134.88 , 132.29 , 127.02 (d,  $J_{PC} = 5.0$  Hz), 124.31 (d,  $J_{PC} = 6.8$  Hz), 122.25 (d,  $J_{PC} = 46.7$  Hz), 56.97 , 47.90 , 42.16 (d,  $J_{PC} = 3.1$  Hz), 41.90

(d,  $J_{PC} = 23.9$  Hz), 36.32 , 32.66 , 28.60 (d,  $J_{PC} = 9.9$  Hz), 27.98 , 27.06 .  $^{31}\text{P}$  NMR (162 MHz, Chloroform-d)  $\delta$  53.27. IR ( $\text{cm}^{-1}$ ): 2905, 2852, 1471, 1450, 1307, 1138, 974. MS (ESI/[M+Na] $^{+}$ ): 772.26.

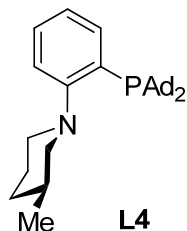

**L4** Prepared by the coupling of (1-Ad) $_2$ PH and 1-(2-bromophenyl)-3-methylpiperidine via the standard procedure employing 3 mol% Pd and 3.6 mol% ligand in 57% yield as a white solid.  $^1\text{H}$  NMR (500 MHz, Chloroform-d)  $\delta$  7.67 (d,  $J = 7.6$  Hz, 1H), 7.26(td,  $J = 7.6, 1.2$  Hz, 1H), 7.02 (ddd,  $J = 8.0, 4.5, 1.1$  Hz, 1H), 6.98 (td,  $J = 7.4, 1.2$  Hz, 1H), 3.25 – 3.16 (m, 2H), 2.54 (td,  $J = 11.2, 2.4$  Hz, 1H), 2.21 (t,  $J = 10.5$  Hz, 1H), 2.00 – 1.85 (m, 19H), 1.81 – 1.71 (m, 2H), 1.70 – 1.61 (m, 13H), 1.01 – 0.90 (m, 1H), 0.88 (d,  $J = 6.7$  Hz, 3H).  $^{13}\text{C}$  NMR (126 MHz, Chloroform-d)  $\delta$  160.99 (d,  $J_{PC} = 20.9$  Hz), 137.33 (d,  $J_{PC} = 3.2$  Hz), 131.35 (d,  $J_{PC} = 26.9$  Hz), 129.12 , 121.29 (d,  $J_{PC} = 0.8$  Hz), 120.11 (d,  $J_{PC} = 3.7$  Hz), 62.02 (d,  $J_{PC} = 5.4$  Hz), 54.10 (d,  $J_{PC} = 5.7$  Hz), 41.92 (t,  $J_{PC} = 13.9$  Hz), 37.13 , 36.67 (dd,  $J_{PC} = 27.8, 4.1$  Hz), 32.98 , 30.94 , 28.97 (dd,  $J_{PC} = 8.4, 1.1$  Hz), 25.65 , 19.71 .  $^{31}\text{P}$  NMR (162 MHz, Chloroform-d)  $\delta$  21.55. IR( $\text{cm}^{-1}$ ): 2901, 2847, 1580, 1450, 1301, 1263, 1222, 1063, 990, 738. MS (ESI/[M+H] $^{+}$ ):476.34.

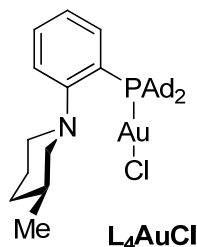

This complex was prepared quantitatively by stirring the ligand with an equivalent of Me $_2$ SAuCl followed by simple concentration under vacuum.  $^1\text{H}$  NMR (500 MHz, Chloroform-d)  $\delta$  7.75 (t,  $J = 7.3$  Hz, 1H), 7.59 – 7.51 (m, 2H), 7.31 – 7.25 (m, 1H), 2.82 (d,  $J = 8.3$  Hz, 1H), 2.77 – 2.60 (m, 4H), 2.34 (t,  $J = 10.6$  Hz, 1H), 2.21-2.19 (m, 6H), 2.15 – 2.07 (m, 6H), 1.98-1.93 (m, 7H), 1.67-1.61 (m, 13H), 1.02 – 0.90 (m, 1H), 0.84 (d,  $J = 6.5$  Hz, 3H).  $^{13}\text{C}$  NMR (126 MHz, Chloroform-d)  $\delta$  160.73 (d,  $J_{PC} = 7.0$  Hz), 134.89 , 132.31 (d,  $J_{PC} = 1.7$  Hz), 126.70 (d,  $J_{PC} = 4.8$  Hz), 124.29 (d,  $J_{PC} = 6.7$  Hz), 122.16 (d,  $J_{PC} = 47.3$  Hz), 63.69 , 55.84 , 42.14 (dd,  $J_{PC} = 8.5, 3.1$  Hz), 41.80 (d,  $J_{PC} = 4.9$  Hz), 36.31 , 32.97 , 29.86 , 28.59 (d,  $J = 9.9$  Hz), 25.17 , 20.21 .  $^{31}\text{P}$

NMR (162 MHz, Chloroform-d)  $\delta$  53.69. IR( $\text{cm}^{-1}$ ): 2905, 2850, 1451, 1344, 1262, 971, 775, 735. MS (ESI/[M+Na] $^{+}$ ): 730.22.

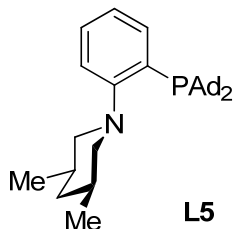

**L5** Prepared by the coupling of (1-Ad) $_2$ PH and *Cis-1-(2-bromophenyl)-3,5-dimethylpiperidine* via the standard procedure employing 3 mol% Pd and 3.6 mol% ligand in 68% yield as a white solid.  $^1\text{H}$  NMR (500 MHz, Chloroform-d)  $\delta$  7.67 (d,  $J = 7.5$  Hz, 1H), 7.26 (q,  $J = 7.6, 5.8$  Hz, 1H), 7.03 – 6.95 (m, 2H), 3.25 (d,  $J = 9.1$  Hz, 2H), 2.11 (t,  $J = 10.7$  Hz, 2H), 1.97-1.89 (m, 20H), 1.77 (d,  $J = 12.7$  Hz, 2H), 1.67 (br, 12H), 0.86 (d,  $J = 6.6$  Hz, 6H), 0.61 (q,  $J = 12.1$  Hz, 1H).  $^{13}\text{C}$  NMR (126 MHz, Chloroform-d)  $\delta$  160.66 (d,  $J_{\text{PC}} = 20.9$  Hz), 137.39 (d,  $J_{\text{PC}} = 3.2$  Hz), 131.11 (d,  $J_{\text{PC}} = 26.7$  Hz), 129.12, 121.17, 119.98 (d,  $J_{\text{PC}} = 3.7$  Hz), 61.57 (d,  $J_{\text{PC}} = 5.8$  Hz), 42.19, 41.95 (d,  $J_{\text{PC}} = 13.6$  Hz), 37.13, 36.67 (d,  $J_{\text{PC}} = 27.8$  Hz), 30.96, 28.97 (d,  $J_{\text{PC}} = 8.4$  Hz), 19.57.  $^{31}\text{P}$  NMR (162 MHz, Chloroform-d)  $\delta$  21.76. IR ( $\text{cm}^{-1}$ ): 2902, 2847, 1370, 1455, 1284, 970. MS (ESI/[M+H] $^{+}$ ): 490.39.

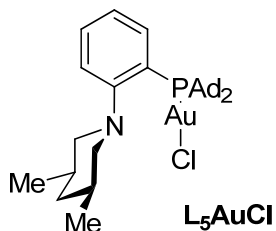

This complex was prepared quantitatively by stirring the ligand with an equivalent of Me $_2$ SAuCl followed by simple concentration under vacuum.  $^1\text{H}$  NMR (500 MHz, Chloroform-d)  $\delta$  7.75 (t,  $J = 7.3$  Hz, 1H), 7.55 – 7.53 (m, 2H), 7.29-7.26 (m, 1H), 2.74 (d,  $J = 7.5$  Hz, 4H), 2.31 – 2.16 (m, 8H), 2.12 (br, 6H), 1.98 (br, 6H), 1.92 (d,  $J = 12.6$  Hz, 1H), 1.70-1.65 (br, 12H), 0.85 (d,  $J = 6.2$  Hz, 6H), 0.63 (q,  $J = 11.6$  Hz, 1H).  $^{13}\text{C}$  NMR (126 MHz, Chloroform-d)  $\delta$  160.50 (d,  $J_{\text{PC}} = 7.1$  Hz), 134.90, 132.30, 126.62 (d,  $J_{\text{PC}} = 4.9$  Hz), 124.28 (d,  $J_{\text{PC}} = 6.8$  Hz), 122.10 (d,  $J_{\text{PC}} = 47.0$  Hz), 63.28, 42.13 (d,  $J_{\text{PC}} = 3.1$  Hz), 42.03, 41.91 (d,  $J_{\text{PC}} = 23.6$  Hz), 36.31, 29.80, 28.59 (d,  $J_{\text{PC}} = 9.9$  Hz), 20.01.  $^{31}\text{P}$  NMR (162 MHz, Chloroform-d)  $\delta$  53.65. IR ( $\text{cm}^{-1}$ ): 2906, 2850, 1455, 1344, 1329, 1262, 972, 774, 735. HRMS calculated for [C $_{33}$ H $_{48}$ AuClINaP] $^{+}$ : 744.2776, found 744.2763.

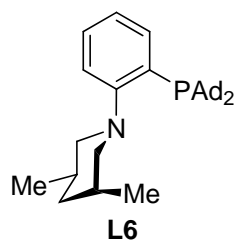

**L<sub>6</sub>** Prepared by the coupling of (1-Ad)<sub>2</sub>PH and *trans*-1-(2-bromophenyl)-3,5-dimethylpiperidine via the standard procedure employing 3 mol% Pd and 3.6 mol% ligand in 52% yield as a white solid. <sup>1</sup>H NMR (500 MHz, Chloroform-d) δ 7.69 (d, *J* = 7.5 Hz, 1H), 7.27 (t, *J* = 7.4 Hz, 1H), 7.04 (dd, *J* = 7.4, 4.7 Hz, 1H), 6.99 (t, *J* = 7.3 Hz, 1H), 3.08 (d, *J* = 9.4 Hz, 2H), 2.48 (br, 2H), 2.10 (dd, *J* = 9.7, 6.1 Hz, 2H), 2.04 – 1.79 (m, 19H), 1.69 (s, 6H), 1.64 (s, 6H), 1.56 (br, 1H), 1.36 (t, *J* = 5.6 Hz, 2H), 1.03 (d, *J* = 6.7 Hz, 6H). <sup>13</sup>C NMR (126 MHz, Chloroform-d) δ 161.44 (d, *J<sub>PC</sub>* = 21.3 Hz), 137.61 (d, *J<sub>PC</sub>* = 2.8 Hz), 131.24 (d, *J<sub>PC</sub>* = 27.8 Hz), 129.23 , 121.30 , 120.07 (d, *J<sub>PC</sub>* = 3.9 Hz), 42.35 (d, *J<sub>PC</sub>* = 14.0 Hz), 41.77 (d, *J<sub>PC</sub>* = 13.7 Hz), 39.20 , 37.13 (d, *J<sub>PC</sub>* = 2.6 Hz), 36.72 (d, *J<sub>PC</sub>* = 26.3 Hz), 28.97 (t, *J<sub>PC</sub>* = 8.9 Hz), 27.74 , 19.54 (d, *J<sub>PC</sub>* = 2.0 Hz). <sup>31</sup>P NMR (162 MHz, Chloroform-d) δ 19.56. IR (cm<sup>-1</sup>): 2861, 2847, 1619, 1452, 1276, 1220, 774, 735. MS (ESI/[M+H]<sup>+</sup>): 490.38.

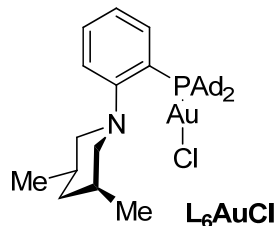

This complex was prepared quantitatively by stirring the ligand with an equivalent of Me<sub>2</sub>SAuCl followed by simple concentration under vacuum. <sup>1</sup>H NMR (600 MHz, Chloroform-d) δ 7.76 (t, *J* = 7.6 Hz, 1H), 7.60 (dd, *J* = 8.1, 4.7 Hz, 1H), 7.53 (t, *J* = 7.6 Hz, 1H), 7.24 (t, *J* = 7.6 Hz, 1H), 3.07 – 3.00 (m, 3H), 2.53 (d, *J* = 10.9 Hz, 1H), 2.32 (br, 3H), 2.26 (br, 3H), 2.16-2.14 (m, 3H), 2.04-1.98 (m, 11H), 1.75-1.73 (m, 3H), 1.69-1.66 (m, 9H), 1.48 (d, *J* = 7.2 Hz, 3H), 1.20 (td, *J* = 12.6, 4.7 Hz, 1H), 0.89-0.84 (m, 4H). <sup>13</sup>C NMR (151 MHz, Chloroform-d) δ 161.42 (d, *J<sub>PC</sub>* = 6.7 Hz), 135.13 , 132.26 , 126.68 (d, *J<sub>PC</sub>* = 5.7 Hz), 123.92 (d, *J<sub>PC</sub>* = 6.9 Hz), 122.02 (d, *J<sub>PC</sub>* = 45.5 Hz), 65.64 , 59.89 , 43.12 , 42.97 (d, *J<sub>PC</sub>* = 2.8 Hz), 41.76 (d, *J<sub>PC</sub>* = 24.4 Hz), 41.50 , 38.56 , 36.38 , 29.75 , 28.86 (d, *J<sub>PC</sub>* = 9.8 Hz), 28.45 (d, *J<sub>PC</sub>* = 9.8 Hz), 25.56 , 19.93 (d, *J<sub>PC</sub>* = 10.6 Hz). <sup>31</sup>P NMR (162 MHz, Chloroform-d) δ 54.27. IR (cm<sup>-1</sup>): 2905, 2850, 1455, 1395, 1301, 1201, 1216, 1057, 972, 793, 754. MS (ESI/[M+Na]<sup>+</sup>): 744.22.

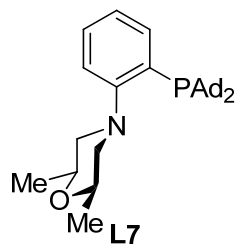

**L<sub>7</sub>** Prepared by the coupling of (1-Ad)<sub>2</sub>PH and *cis*-4-(2-bromophenyl)-2,6-dimethylmorpholine via the standard procedure employing 3 mol% Pd and 3.6 mol% ligand in 69 % yield as a white solid. <sup>1</sup>H NMR (500 MHz, Chloroform-d) δ 7.69 (d, *J* = 7.4 Hz, 1H), 7.28(t, *J* = 7.4 Hz, 1H), 7.06 – 6.99 (m, 2H), 3.90 (ddt, *J* = 8.8, 6.2, 3.3 Hz, 2H), 3.22 (d, *J* = 12.0 Hz, 2H), 2.43 (t, *J* = 10.6 Hz, 2H), 1.93 (dd, *J* = 24.5, 13.2 Hz, 18H), 1.67 (br, 12H), 1.19 (d, *J* = 6.3 Hz, 6H). <sup>13</sup>C NMR (126 MHz, Chloroform-d) δ 159.20 (d, *J<sub>PC</sub>* = 20.5 Hz), 137.58 (d, *J<sub>PC</sub>* = 3.0 Hz), 130.96 (d, *J<sub>PC</sub>* = 27.3 Hz), 129.38, 121.85, 119.91 (d, *J<sub>PC</sub>* = 3.8 Hz), 71.71, 59.17 (d, *J<sub>PC</sub>* = 5.8 Hz), 41.97 (d, *J<sub>PC</sub>* = 13.3 Hz), 37.07, 36.80 (d, *J<sub>PC</sub>* = 27.2 Hz), 28.92 (d, *J<sub>PC</sub>* = 8.5 Hz), 19.08. <sup>31</sup>P NMR (162 MHz, Chloroform-d) δ 20.59. IR (cm<sup>-1</sup>): 2901, 2847, 1458, 1356, 1309, 1279, 1246, 1154, 1021, 752. MS (ESI/[M+H]<sup>+</sup>): 492.36.

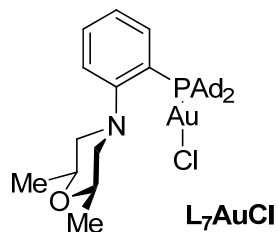

This complex was prepared quantitatively by stirring the ligand with an equivalent of Me<sub>2</sub>SAuCl followed by simple concentration under vacuum. <sup>1</sup>H NMR (500 MHz, Chloroform-d) δ 7.77 (t, *J* = 7.4 Hz, 1H), 7.59 – 7.57 (m, 2H), 7.32 (dt, *J* = 5.7, 2.7 Hz, 1H), 4.73 (ddt, *J* = 8.7, 6.2, 3.1 Hz, 2H), 2.69 (dd, *J* = 11.2, 1.7 Hz, 2H), 2.56 (t, *J* = 10.5 Hz, 2H), 2.21-2.19 (m, 6H), 2.14 – 2.07 (m, 6H), 1.99 (br, 6H), 1.68 (br, 12H), 1.17 (d, *J* = 6.2 Hz, 6H). <sup>13</sup>C NMR (126 MHz, Chloroform-d) δ 159.03 (d, *J<sub>PC</sub>* = 7.1 Hz), 135.07, 132.61, 127.13 (d, *J<sub>PC</sub>* = 4.9 Hz), 124.80 (d, *J<sub>PC</sub>* = 6.7 Hz), 122.41 (d, *J<sub>PC</sub>* = 46.6 Hz), 70.07, 60.61, 42.19 (d, *J<sub>PC</sub>* = 3.0 Hz), 42.01 (d, *J<sub>PC</sub>* = 23.6 Hz), 36.26, 28.58 (d, *J<sub>PC</sub>* = 9.9 Hz), 19.41. <sup>31</sup>P NMR (162 MHz, Chloroform-d) δ 53.68. IR (cm<sup>-1</sup>): 2905, 2851, 1450, 1300, 1140, 1078, 974. HRMS calculated for [C<sub>32</sub>H<sub>46</sub>AuClINNaOP]<sup>+</sup>: 746.2569, found 746.2560.



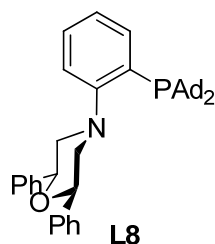

**L<sub>8</sub>** Prepared by the coupling of (1-Ad)<sub>2</sub>PH and *Cis*-4-(2-bromophenyl)-2,6-diphenylmorpholine via the standard procedure employing 3 mol% Pd and 3.6 mol% ligand in 63 % yield as a white solid. <sup>1</sup>H NMR (500 MHz, Chloroform-d) δ 7.73 (d, *J* = 7.6 Hz, 1H), 7.55 (d, *J* = 7.5 Hz, 4H), 7.39 (t, *J* = 7.6 Hz, 4H), 7.30 (t, *J* = 7.3 Hz, 2H), 7.27 – 7.23 (m, 1H), 7.04 (t, *J* = 7.4 Hz, 1H), 6.97 (dd, *J* = 7.9, 4.4 Hz, 1H), 5.08 (d, *J* = 8.3 Hz, 2H), 3.58 (d, *J* = 11.9 Hz, 2H), 2.80 (t, *J* = 10.8 Hz, 2H), 2.03 (q, *J* = 12.2 Hz, 12H), 1.94 (br, 6H), 1.72 (br, 12H). <sup>13</sup>C NMR (126 MHz, Chloroform-d) δ 158.76 (d, *J<sub>PC</sub>* = 20.6 Hz), 140.83 , 137.62 (d, *J<sub>PC</sub>* = 3.1 Hz), 130.98 (d, *J<sub>PC</sub>* = 27.1 Hz), 129.44 , 128.20 , 127.44 , 126.02 , 122.12 , 119.92 (d, *J<sub>PC</sub>* = 3.8 Hz), 78.09 , 59.98 (d, *J<sub>PC</sub>* = 6.1 Hz), 42.08 (d, *J<sub>PC</sub>* = 13.3 Hz), 37.11 , 36.93 (d, *J<sub>PC</sub>* = 26.9 Hz), 28.97 (d, *J<sub>PC</sub>* = 8.5 Hz). <sup>31</sup>P NMR (162 MHz, Chloroform-d) δ 20.84. IR (cm<sup>-1</sup>):2909, 2846, 1732, 1450, 1347, 1223, 1104, 971. MS (ESI/[M+H]<sup>+</sup>): 616.42.

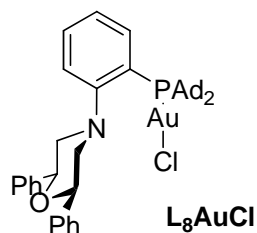

This complex was prepared quantitatively by stirring the ligand with an equivalent of Me<sub>2</sub>SAuCl followed by simple concentration under vacuum. <sup>1</sup>H NMR (500 MHz, Chloroform-d) δ 7.79 (t, *J* = 7.3 Hz, 1H), 7.62 – 7.58 (m, 1H), 7.55 (d, *J* = 7.3 Hz, 5H), 7.34 (t, *J* = 7.5 Hz, 4H), 7.27 (d, *J* = 6.9 Hz, 3H), 5.91 (d, *J* = 8.1 Hz, 2H), 3.08 – 2.90 (m, 4H), 2.33 – 2.15 (m, 12H), 2.02 (br, 6H), 1.71 (br, 12H). <sup>13</sup>C NMR (126 MHz, Chloroform-d) δ 158.52 (d, *J<sub>PC</sub>* = 7.0 Hz), 140.62 , 135.18 (d, *J<sub>PC</sub>* = 1.5 Hz), 132.59 (d, *J<sub>PC</sub>* = 1.6 Hz), 128.16 , 127.56 , 127.01 (d, *J<sub>PC</sub>* = 5.0 Hz), 126.46 , 124.96 (d, *J<sub>PC</sub>* = 6.7 Hz), 122.49 (d, *J<sub>PC</sub>* = 45.8 Hz), 76.39 , 60.93 , 42.26 (d, *J<sub>PC</sub>* = 2.6 Hz), 42.09 , 36.31 , 28.62 (d, *J<sub>PC</sub>* = 9.9 Hz). <sup>31</sup>P NMR (162 MHz, Chloroform-d) δ 54.06. IR (cm<sup>-1</sup>):2905, 2859, 1474, 1450, 1347, 1304, 1097, 758. MS (ESI/[M+Na]<sup>+</sup>): 870.24.

**General procedure for Synthesis L9:**

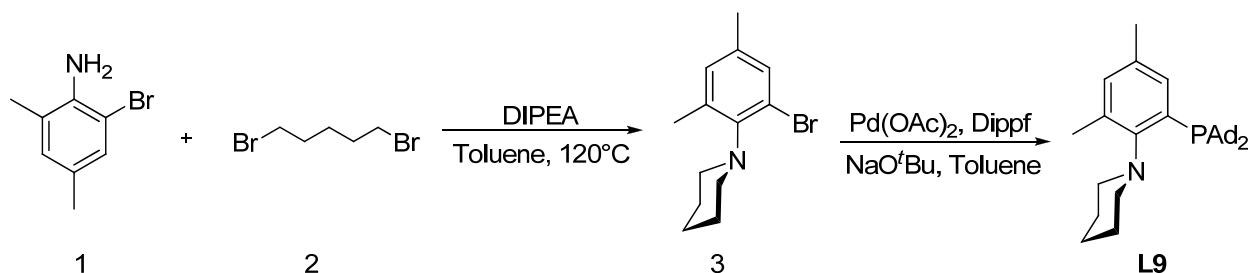

In a 100mL Schlenk tube, it was charged with reagents: 2-bromo-4,6-dimethylaniline(1.98 g, 10.0 mmol), 1,5-dibromopentane(3.45g, 15 mmol), Diisopropylethylamine (2.54 g, 20 mmol), NaI (150 mg, 1 mmol) in 50 mL toluene and the reaction system was stirred in an oil bath at 120°C for 15h. Upon completion, the mixture was concentrated and the residue was purified by chromatography on silica gel (eluent: hexanes/ethyl acetate) to afford the desired product **3** in 50% yield.

In a 25mL Schlenk tube, Pd(OAc)<sub>2</sub> (typically 3 mol %) and DiPPF (1,1'-bis(diisopropylphosphino)ferrocene; Pd:L = 1:1.2) , di(1-adamantyl)phosphine (1.5mmol) and NaO<sup>t</sup>Bu(1.8 mmol), followed by the addition of the aryl halide **3**(1.5mmol) in 8 mL toluene; the Schlenk tube was then degassed twice. The resulting mixture was heated at 110 °C until complete consumption of the phosphine was achieved, as judged on the basis of <sup>31</sup>P NMR data. The solution was then cooled and filtered through a plug of silica, which in turn was washed with CH<sub>2</sub>Cl<sub>2</sub>. Removal of the solvent from the combined eluent afforded **L9** in 45% yield that was further purified by washing with EtOAc.

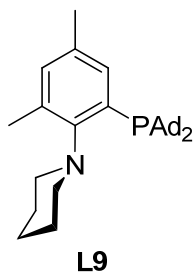

<sup>1</sup>H NMR (500 MHz, Chloroform-d) δ 7.34 (s, 1H), 6.99 (s, 1H), 3.29 (dd, *J* = 13.4, 5.5 Hz, 2H), 2.97 – 2.86 (m, 2H), δ 2.30 (s, 3H), 2.29 (s, 3H), 2.02 – 1.98 (m, 6H), 1.88-1.86(m, 12H), 1.76 – 1.62 (m, 14H), 1.61 – 1.50 (m, 4H). <sup>13</sup>C NMR (126 MHz, Chloroform-d) δ 156.16 (d, *J*<sub>PC</sub> = 25.2 Hz), 137.55 (d, *J*<sub>PC</sub> = 5.8 Hz), 135.91 (d, *J*<sub>PC</sub> = 2.3 Hz), 135.15 (d, *J*<sub>PC</sub> = 27.0 Hz), 132.60 , 131.77 , 52.99 (d, *J*<sub>PC</sub> = 7.5 Hz), 42.19 (d, *J*<sub>PC</sub> = 13.6 Hz), 37.08, 37.03 (d, *J*<sub>PC</sub> = 27.7 Hz), 28.99 (d, *J*<sub>PC</sub> = 8.5 Hz), 26.74 , 24.69 , 21.00 , 20.30 (d, *J*<sub>PC</sub> = 1.4 Hz). <sup>31</sup>P NMR (162 MHz,

Chloroform-d)  $\delta$  21.74. IR( $\text{cm}^{-1}$ ): 2865, 2847, 450, 1277, 1219, 1124, 971. MS (ESI/[M+H]<sup>+</sup>): 490.41.

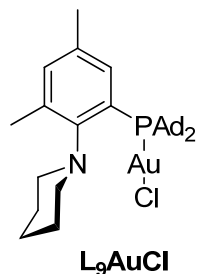

This complex was prepared quantitatively by stirring the ligand with an equivalent of Me<sub>2</sub>SAuCl followed by simple concentration under vacuum. <sup>1</sup>H NMR (500 MHz, Chloroform-d)  $\delta$  7.37 (dd,  $J = 7.1, 1.6$  Hz, 1H), 7.11 (s, 1H), 3.30 (td,  $J = 11.2, 2.9$  Hz, 2H), 2.85 – 2.70 (m, 4H), 2.49 (s, 3H), 2.35 (s, 3H), 2.26 – 2.10 (m, 12H), 2.03 – 1.93 (m, 7H), 1.72 – 1.57 (m, 14H), 1.37-1.29 (m, 1H). <sup>13</sup>C NMR (126 MHz, Chloroform-d)  $\delta$  153.45 (d,  $J_{PC} = 6.5$  Hz), 139.98 (d,  $J_{PC} = 4.4$  Hz), 137.48 (d,  $J_{PC} = 1.8$  Hz), 133.73 (d,  $J_{PC} = 2.6$  Hz), 133.34 (d,  $J_{PC} = 7.8$  Hz), 124.09 (d,  $J_{PC} = 49.6$  Hz), 50.29, 42.39 (d,  $J_{PC} = 3.3$  Hz), 42.34 (d,  $J_{PC} = 22.7$  Hz), 36.38 (d,  $J_{PC} = 1.2$  Hz), 28.71 (d,  $J_{PC} = 9.8$  Hz), 25.30, 23.62, 21.51 (d,  $J_{PC} = 1.1$  Hz), 20.96. <sup>31</sup>P NMR (162 MHz, Chloroform-d)  $\delta$  59.83. IR ( $\text{cm}^{-1}$ ): 2906, 2847, 1450, 1344, 1304, 1224, 1107, 973. HRMS calculated for [C<sub>33</sub>H<sub>48</sub>AuClINaP]<sup>+</sup>: 744.2776, found 744.2770.

### General procedure for Synthesis L10.

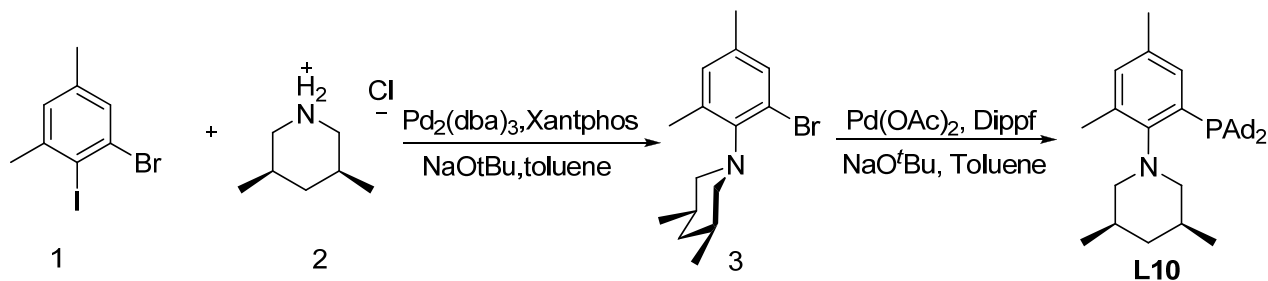

In a 25mL Schlenk tube, Pd<sub>2</sub>(dba)<sub>3</sub> (typically 2.5 mol %) and Xantphos (10 mol %), Cis-3,5-dimethylpiperidinium chloride (2 mmol) and NaO<sup>t</sup>Bu(4.8 mmol), followed by the addition of the aryl halide **1**(2 mmol) in 10 mL toluene; the Schlenk tube was then degassed twice. The resulting mixture was heated at 100 °C for 12h under N<sub>2</sub>. The solution was then cooled and filtered through a plug of silica, the mixture was then concentrated and the residue was purified by chromatography on silica gel to give 1-(2-bromo-4,6-dimethylphenyl)-3,5-dimethylpiperidine **3** in 10 % yield.

The procedure for the synthesis Ligand 10 is the same as the synthesis L9.

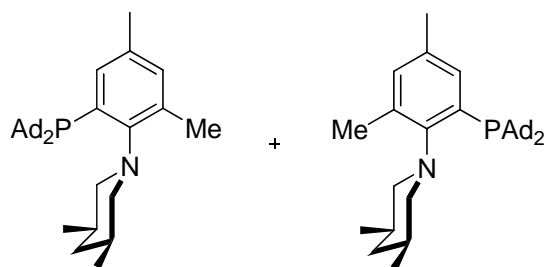

**L10**

$^1\text{H}$  NMR (500 MHz, Chloroform-*d*)  $\delta$  7.34 (d,  $J = 16.6$  Hz, 1H), [7.05 (s), 6.88 (s), 1H] 3.07 (t,  $J = 10.9$  Hz, 1H), 2.90 – 2.85 (m, 1H), 2.75 (d,  $J = 9.2$  Hz, 1H), 2.60 (t,  $J = 10.6$  Hz, 1H), 2.30 (s, 3H), [2.26 (s), 2.25 (s), 3H], 2.13 – 2.07 (m, 1H), 2.04 – 1.82 (m, 18H), 1.74-1.59 (m, 14H), 0.84 (d,  $J = 6.3$  Hz, 3H), 0.80 (d,  $J = 6.6$  Hz, 3H), [0.76 ( $J = 12.0$  Hz), 0.61 (q,  $J = 12.0$  Hz), 1H].  $^{13}\text{C}$  NMR (126 MHz, Chloroform-*d*)  $\delta$  156.30 (d,  $J_{PC} = 26.7$  Hz), 154.77 (d,  $J_{PC} = 23.8$  Hz), 138.19 (d,  $J_{PC} = 8.2$  Hz), 136.64, 136.40, 135.86 (d,  $J_{PC} = 21.3$  Hz), 135.28, 134.70 (d,  $J_{PC} = 30.8$  Hz), 133.00, 132.28, 131.88, 131.68, 60.84, 60.76, 58.90, 43.41 (d,  $J_{PC} = 9.9$  Hz), 42.77, 42.49, 42.34 (d,  $J_{PC} = 13.0$  Hz), 42.02 (d,  $J_{PC} = 14.3$  Hz), 37.33 (d,  $J_{PC} = 26.1$  Hz), 37.15, 37.04, 36.75, 36.57 (d,  $J_{PC} = 29.4$  Hz), 32.56, 30.30, 29.70, 28.98 (d,  $J_{PC} = 8.5$  Hz), 21.00 (d,  $J_{PC} = 2.9$  Hz), 20.25 (d,  $J_{PC} = 18.6$  Hz), 19.36 (d,  $J_{PC} = 19.2$  Hz).  $^{31}\text{P}$  NMR (162 MHz, Chloroform-*d*)  $\delta$  21.86, 21.59. IR ( $\text{cm}^{-1}$ ): 2902, 2847, 1451, 1376, 1342, 1223, 961, 858, 751. MS (ESI/[M+H] $^+$ ): 518.36.

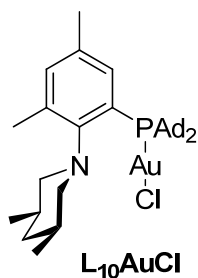

**L<sub>10</sub>AuCl**

This complex was prepared quantitatively by stirring the ligand with an equivalent of  $\text{Me}_2\text{SAuCl}$  followed by simple concentration under vacuum.  $^1\text{H}$  NMR (500 MHz, Chloroform-*d*)  $\delta$  7.38 (d,  $J = 6.9$  Hz, 1H), 7.10 (s, 1H), 2.91 (dd,  $J = 10.2, 4.8$  Hz, 2H), 2.82 – 2.69 (m, 4H), 2.45 (s, 3H), 2.34 (s, 3H), 2.23 – 2.11 (m, 12H), 1.99 (br, 6H), 1.91 (d,  $J = 12.7$  Hz, 1H), 1.71-1.65 (m, 13H), 0.85 (s, 3H), 0.84 (s, 3H), 0.66 (q,  $J = 12.0$  Hz, 1H).  $^{13}\text{C}$  NMR (126 MHz, Chloroform-*d*)  $\delta$  152.90 (d,  $J_{PC} = 6.3$  Hz), 139.97 (d,  $J_{PC} = 4.5$  Hz), 137.51, 133.78, 133.33 (d,  $J_{PC} = 7.7$  Hz), 123.97 (d,  $J_{PC} = 49.5$  Hz), 57.45, 42.52 – 42.24 (m), 41.65, 36.37, 29.87, 28.72 (d,  $J_{PC} = 9.8$

Hz), 21.56 , 20.94 , 20.18 .  $^{31}\text{P}$  NMR (162 MHz, Chloroform-d)  $\delta$  59.64. IR( $\text{cm}^{-1}$ ):2906, 2851, 1452, 1301, 1225, 972, 734. HRMS calculated for  $[\text{C}_{35}\text{H}_{52}\text{AuCINNaP}]^+$ :772.3089, found 772.3111.

**Condition A: General procedure for gold-catalyzed synthesis of  $\alpha$ -carboxymethyl ketones:**

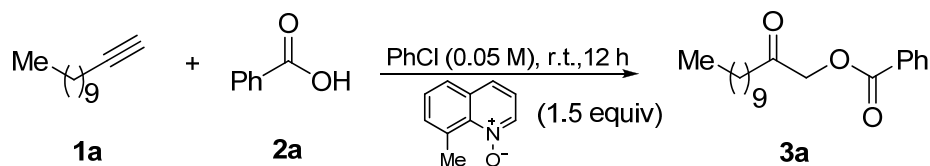

To a 3 dram vial containing 2 mL of chlorobenzene were added sequentially a carboxylic acid (0.2 mmol), an alkyne (0.26 mmol), L<sub>5</sub>AuCl (0.01 mmol) and NaBAR<sup>F</sup><sub>4</sub> (0.02 mmol). The resulting mixture was stirred at room temperature. To this vial a solution of 8-methylquinoline *N*-oxide (47.7 mg, 0.3 mmol) in 4 mL of chlorobenzene was then added via a syringe pump in 12 h. Upon completion, the reaction mixture was concentrated under vacuum. The residue was purified by chromatography on silica gel (eluent: hexanes /ethyl acetate) to afford the desired product **3**.

**2-Oxododecyl benzoate 3a**

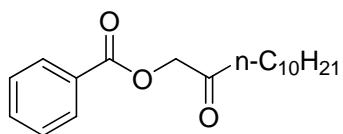

The compound **3a** was prepared in 96% yield according to the general procedure (eluent: ethyl acetate: hexanes = 1:10).  $^1\text{H}$  NMR (500 MHz, Chloroform-d)  $\delta$  8.10 (dt,  $J$  = 8.4, 1.5 Hz, 2H), 7.60 (tt,  $J$  = 7.1, 1.3 Hz, 1H), 7.51 – 7.43 (m, 2H), 4.88 (s, 2H), 2.50 (t,  $J$  = 7.4 Hz, 2H), 1.64 (p,  $J$  = 7.5 Hz, 2H), 1.27 (d,  $J$  = 19.9 Hz, 14H), 0.88 (t,  $J$  = 7.0 Hz, 3H).  $^{13}\text{C}$  NMR (126 MHz, CDCl<sub>3</sub>)  $\delta$  204.17, 165.86, 133.37, 129.86, 129.27, 128.45, 68.38, 38.93, 31.86, 29.52, 29.41, 29.33, 29.27, 29.15, 23.29, 22.65, 14.09. IR ( $\text{cm}^{-1}$ ): 2878, 2849, 1732, 1720, 1625, 1602, 1450, 1413, 1281, 1090, 720. MS (ESI) ( $\text{M}+\text{Na}^+$ ): 327.23.

**2-Oxododecyl 2-methylbenzoate 3b**

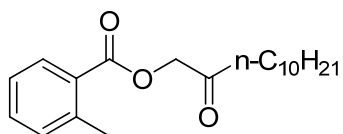

The compound **3b** was prepared in 94% yield according to the general procedure (eluents: ethyl acetate: hexanes = 1:10). <sup>1</sup>H NMR (500 MHz, Chloroform-d) δ 7.93 (dd, *J* = 8.1, 1.4 Hz, 1H), 7.35 (td, *J* = 7.5, 1.4 Hz, 1H), 7.19 (ddd, *J* = 7.2, 3.7, 2.0 Hz, 2H), 4.79 (s, 2H), 2.54 (s, 3H), 2.42 (t, *J* = 7.4 Hz, 2H), 1.64 – 1.50 (m, 2H), 1.29 – 1.12 (m, 14H), 0.81 (t, *J* = 7.0 Hz, 3H). <sup>13</sup>C NMR (151 MHz, CDCl<sub>3</sub>) δ 204.16, 166.69, 140.64, 132.36, 131.69, 130.81, 125.75, 68.18, 38.92, 31.86, 29.52, 29.41, 29.33, 29.27, 29.15, 23.29, 22.65, 21.67, 14.09. IR (cm<sup>-1</sup>): 2882, 2855, 1725, 1604, 1578, 1459, 1378, 1256, 1143, 1082, 905, 738. MS (ESI) (M+Na<sup>+</sup>): 341.26.

### 2-Oxododecyl 4-(dimethylamino)benzoate **3c**

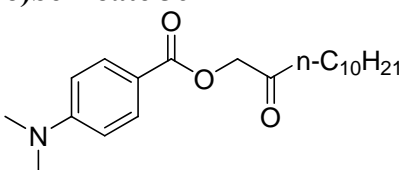

The compound **3c** was prepared in 96% yield according to the general procedure (eluents: ethyl acetate: hexanes = 1:10). <sup>1</sup>H NMR (500 MHz, Chloroform-d) δ 8.27 – 7.65 (m, 2H), 6.80 – 6.51 (m, 2H), 4.80 (s, 2H), 3.06 (s, 6H), 2.49 (t, *J* = 7.4 Hz, 2H), 1.62 (q, *J* = 7.2 Hz, 2H), 1.27 (d, *J* = 15.2 Hz, 14H), 0.88 (t, *J* = 6.7 Hz, 3H). <sup>13</sup>C NMR (126 MHz, CDCl<sub>3</sub>) δ 205.49, 166.13, 153.51, 131.64, 115.96, 110.83, 68.02, 40.09, 38.93, 31.88, 29.54, 29.43, 29.36, 29.29, 29.18, 23.27, 22.66, 14.10. IR (cm<sup>-1</sup>): 2878, 2849, 1727, 1715, 1702, 1648, 1619, 1501, 1464, 1439, 1375, 1287, 1191. MS (ESI) (M+Na<sup>+</sup>): 370.25.

### 2-Oxododecyl 2-bromobenzoate **3d**

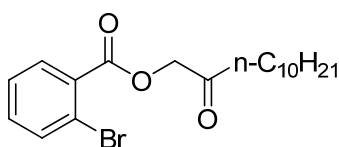

The compound **3d** was prepared in 91% yield according to the general procedure (eluents: ethyl acetate: hexanes = 1:10). <sup>1</sup>H NMR (500 MHz, Chloroform-d) δ 7.95 (dd, *J* = 7.5, 2.0 Hz, 1H), 7.68 (dd, *J* = 7.7, 1.3 Hz, 1H), 7.43 – 7.31 (m, 2H), 4.89 (s, 2H), 2.50 (t, *J* = 7.4 Hz, 2H), 1.65 (p, *J* = 7.4 Hz, 2H), 1.27 (d, *J* = 19.7 Hz, 14H), 0.88 (t, *J* = 6.9 Hz, 3H). <sup>13</sup>C NMR (126 MHz, CDCl<sub>3</sub>) δ 203.58, 165.26, 134.44, 132.98, 131.82, 131.12, 127.23, 121.99, 68.60, 38.99, 31.87, 29.53, 29.41, 29.33, 29.29, 29.15, 23.27, 22.67, 14.10. IR (cm<sup>-1</sup>): 2855, 2758, 1732, 1591, 1468, 1377, 1292, 1251, 1029, 926, 745. MS (ESI) (M+Na<sup>+</sup>): 405.16.

### 2-Oxododecyl 3-(trifluoromethyl)benzoate 3e

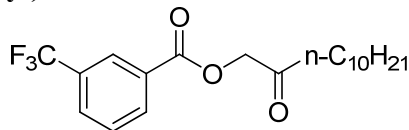

The compound **3e** was prepared in 92% yield according to the general procedure (eluent: ethyl acetate: hexanes = 1:10).  $^1\text{H}$  NMR (500 MHz, Chloroform- $d$ )  $\delta$  8.36 (s, 1H), 8.28 (d,  $J = 7.8$  Hz, 1H), 7.85 (d,  $J = 7.8$  Hz, 1H), 7.61 (t,  $J = 7.8$  Hz, 1H), 4.93 (s, 2H), 2.49 (t,  $J = 7.4$  Hz, 2H), 1.65 (p,  $J = 7.3$  Hz, 2H), 1.43 – 1.10 (m, 14H), 0.88 (t,  $J = 6.8$  Hz, 3H).  $^{13}\text{C}$  NMR (126 MHz,  $\text{CDCl}_3$ )  $\delta$  203.29, 164.58, 133.06, 131.30, 131.04, 130.16, 129.87, 129.85, 129.15, 126.81, 126.77, 124.65, 122.49, 68.60, 38.87, 31.86, 29.51, 29.40, 29.31, 29.26, 29.13, 23.34, 22.64, 14.07. IR ( $\text{cm}^{-1}$ ): 2883, 2851, 1725, 1546, 1468, 1413, 1341, 1302, 1257, 1170, 1123, 1089, 919, 823. MS (ESI) ( $\text{M}+\text{Na}^+$ ): 395.20.

### 2-Oxododecyl 3-(4,4,5,5-tetramethyl-1,3,2-dioxaborolan-2-yl)benzoate 3f

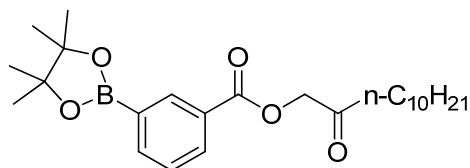

The compound **3f** was prepared in 66% yield according to the general procedure (eluent: ethyl acetate: hexanes = 1:10).  $^1\text{H}$  NMR (500 MHz, Chloroform- $d$ )  $\delta$  8.53 (s, 1H), 8.17 (dt,  $J = 7.8$ , 1.6 Hz, 1H), 8.01 (dt,  $J = 7.4$ , 1.2 Hz, 1H), 7.47 (t,  $J = 7.6$  Hz, 1H), 4.88 (s, 2H), 2.49 (t,  $J = 7.4$  Hz, 2H), 1.66 – 1.59 (m, 2H), 1.35 (s, 12H), 1.29-1.25 (m, 14H), 0.87 (t,  $J = 7.0$  Hz, 3H).  $^{13}\text{C}$  NMR (126 MHz,  $\text{CDCl}_3$ )  $\delta$  204.26, 165.94, 139.60, 136.17, 132.53, 128.64, 128.44, 127.87, 84.10, 68.36, 38.89, 31.86, 29.52, 29.41, 29.33, 29.27, 29.14, 24.86, 23.29, 22.65, 14.09. IR ( $\text{cm}^{-1}$ ): 2881, 2855, 1830, 1726, 1523, 1362, 1253, 1201, 1144, 906. MS (ESI) ( $\text{M}+\text{Na}^+$ ): 453.25.

### 2-oxododecyl 3-nitrobenzoate 3g

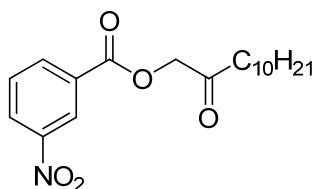

The compound **3g** was prepared in 68% yield according to the general procedure (eluents: ethyl acetate: hexanes = 1:10). <sup>1</sup>H NMR (500 MHz, Chloroform-d) δ 9.11 – 8.77 (m, 1H), 8.67 – 8.24 (m, 2H), 7.68 (t, *J* = 8.0 Hz, 1H), 4.96 (s, 2H), 2.49 (t, *J* = 7.4 Hz, 2H), 1.75 – 1.59 (m, 2H), 1.27 (d, *J* = 17.8 Hz, 14H), 0.87 (t, *J* = 6.9 Hz, 3H). <sup>13</sup>C NMR (126 MHz, CDCl<sub>3</sub>) δ 202.86, 163.80, 148.29, 135.49, 131.06, 129.72, 127.76, 124.87, 68.78, 38.86, 31.85, 29.51, 29.39, 29.31, 29.26, 29.12, 23.35, 22.64, 14.08. IR (cm<sup>-1</sup>): 2919, 2850, 1742, 1726, 1644, 1618, 1530, 1482, 1471, 1413, 1346, 1302, 1268, 1147, 773, 718. Ms (ESI) (M+Na<sup>+</sup>): 372.21.

### 2-Oxododecyl thiophene-2-carboxylate **3h**

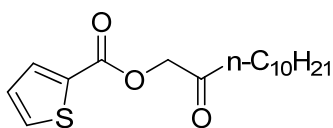

The compound **3h** was prepared in 90% yield according to the general procedure (eluents: ethyl acetate: hexanes = 1:10). <sup>1</sup>H NMR (500 MHz, Chloroform-d) δ 7.88 (dd, *J* = 3.8, 1.3 Hz, 1H), 7.61 (dd, *J* = 5.0, 1.3 Hz, 1H), 7.13 (dd, *J* = 5.0, 3.8 Hz, 1H), 4.84 (s, 2H), 2.48 (t, *J* = 7.4 Hz, 2H), 1.63 (p, *J* = 7.4 Hz, 2H), 1.39 – 1.16 (m, 14H), 0.88 (t, *J* = 7.0 Hz, 3H). <sup>13</sup>C NMR (126 MHz, CDCl<sub>3</sub>) δ 204.02, 161.38, 134.25, 133.09, 132.50, 127.89, 68.34, 38.88, 31.86, 29.52, 29.40, 29.33, 29.27, 29.14, 23.27, 22.66, 14.10. IR (cm<sup>-1</sup>): 2923, 2849, 1725, 1707, 1525, 1418, 1404, 1368, 1268, 1122, 1089, 998, 966. MS (ESI) (M+Na<sup>+</sup>): 333.19.

### 2-Oxododecyl cinnamate **3i**

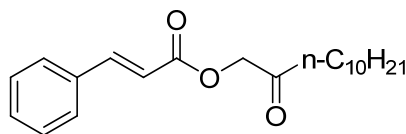

The compound **3i** was prepared in 94% yield according to the general procedure (eluents: ethyl acetate : hexanes = 1:10). <sup>1</sup>H NMR (500 MHz, Chloroform-d) δ 7.77 (d, *J* = 16.0 Hz, 1H), 7.55 (dd, *J* = 6.6, 3.0 Hz, 2H), 7.44 – 7.37 (m, 3H), 6.54 (d, *J* = 16.0 Hz, 1H), 4.78 (s, 2H), 2.46 (t, *J* = 7.5 Hz, 2H), 1.63 (p, *J* = 7.4 Hz, 2H), 1.37 – 1.16 (m, 14H), 0.88 (t, *J* = 7.0 Hz, 3H). <sup>13</sup>C NMR (126 MHz, CDCl<sub>3</sub>) δ 204.31, 166.12, 146.14, 134.15, 130.54, 128.90, 128.20, 116.84, 68.03, 38.88, 31.86, 29.52, 29.40, 29.32, 29.27, 29.14, 23.32, 22.65, 14.08. IR (cm<sup>-1</sup>): 2920, 2850, 1717, 1665, 1641, 1518, 1447, 1413, 1317, 1258, 1181, 863, 766. MS (ESI) (M+Na<sup>+</sup>): 353.25.

### (*E*)-2-Oxododecyl 3-(furan-2-yl)acrylate **3j**



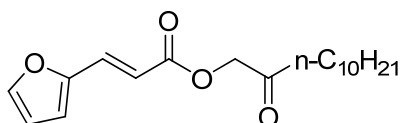

The compound **3j** was prepared in 97% yield according to the general procedure (eluents: ethyl acetate : hexanes = 1:10).  $^1\text{H}$  NMR (500 MHz, Chloroform- $d$ )  $\delta$  7.64 – 7.40 (m, 1H), 6.65 (d,  $J$  = 3.4 Hz, 2H), 6.48 (dd,  $J$  = 3.1, 1.6 Hz, 1H), 6.40 (d,  $J$  = 15.7 Hz, 1H), 4.75 (s, 2H), 2.45 (t,  $J$  = 7.5 Hz, 2H), 1.61 (q,  $J$  = 7.2 Hz, 2H), 1.29-1.26 (m, 14H), 0.88 (t,  $J$  = 6.9 Hz, 3H).  $^{13}\text{C}$  NMR (126 MHz,  $\text{CDCl}_3$ )  $\delta$  204.43, 166.18, 150.73, 145.04, 132.23, 115.39, 114.42, 112.36, 68.02, 38.86, 31.86, 29.52, 29.41, 29.32, 29.27, 29.13, 23.28, 22.65, 14.08. IR ( $\text{cm}^{-1}$ ): 2881, 2851, 1705, 1664, 1638, 1542, 1211, 1112. MS (ESI) ( $\text{M}+\text{Na}^+$ ): 343.23.

### (2*E*,4*E*)-2-Oxododecyl hexa-2,4-dienoate **3k**

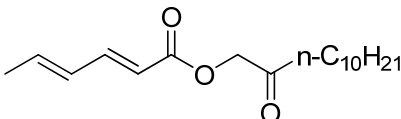

The compound **3k** was prepared in 93% yield according to the general procedure (eluents: ethyl acetate: hexanes = 1:10).  $^1\text{H}$  NMR (500 MHz, Chloroform- $d$ )  $\delta$  7.33 (dd,  $J$  = 15.4, 10.0 Hz, 1H), 6.39 – 6.05 (m, 2H), 5.87 (d,  $J$  = 15.7 Hz, 1H), 4.70 (s, 2H), 2.43 (t,  $J$  = 7.5 Hz, 2H), 1.87 (d,  $J$  = 5.8 Hz, 3H), 1.61 (q,  $J$  = 7.3 Hz, 2H), 1.29-1.26 (m, 14H), 0.88 (t,  $J$  = 7.0 Hz, 3H).  $^{13}\text{C}$  NMR (126 MHz,  $\text{CDCl}_3$ )  $\delta$  204.56, 166.39, 146.43, 140.30, 129.69, 117.58, 67.84, 38.84, 31.86, 29.52, 29.40, 29.31, 29.27, 29.13, 23.28, 22.65, 18.67, 14.08. IR ( $\text{cm}^{-1}$ ): 2880, 2849, 1720, 1649, 1624, 1462, 1410, 1331, 1244, 1149, 1129, 994. MS (ESI) ( $\text{M}+\text{Na}^+$ ): 317.25.

### 2-oxododecyl 2-(1-methyl-1H-indol-3-yl)acetate **3l**

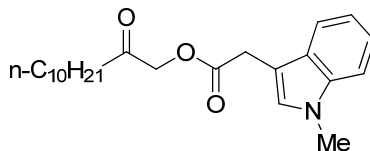

The compound **3l** was prepared in 90 % yield according to the condition A.  $^1\text{H}$  NMR (600 MHz, Chloroform- $d$ )  $\delta$  7.62 (d,  $J$  = 7.9 Hz, 1H), 7.30 (d,  $J$  = 8.2 Hz, 1H), 7.24 (t,  $J$  = 7.6 Hz, 1H), 7.14 (t,  $J$  = 7.4 Hz, 1H), 7.09 (s, 1H), 4.66 (s, 2H), 3.90 (s, 2H), 3.77 (s, 3H), 2.34 (t,  $J$  = 7.5 Hz, 2H), 1.69 – 1.48 (m, 2H), 1.30-1.25 (m, 14H), 0.89 (t,  $J$  = 7.0 Hz, 3H).  $^{13}\text{C}$  NMR (126 MHz,  $\text{CDCl}_3$ )  $\delta$  204.24, 171.30, 136.83, 127.81, 127.58, 121.77, 119.19, 118.85, 109.24, 106.21, 68.17, 38.78,

32.66, 31.85, 30.73, 29.50, 29.38, 29.27, 29.04, 23.18, 22.64, 14.08. IR( $\text{cm}^{-1}$ ):2926, 2855, 1732, 1468, 1376, 1134, 739. MS (ESI/[ $\text{M}+\text{Na}$ ] $^{+}$ ):394.27.

### 2-Oxododecyl 2-(trimethylsilyl)acetate **3m**

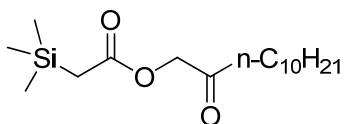

The compound **3m** was prepared in 92% yield according to the general procedure (eluents: ethyl acetate: hexanes = 1:10).  $^1\text{H}$  NMR (600 MHz, Chloroform- $d$ )  $\delta$  4.60 (s, 2H), 2.39 (t,  $J = 7.5$  Hz, 2H), 1.98 (s, 2H), 1.59 (p,  $J = 7.4$  Hz, 2H), 1.32 – 1.17 (m, 14H), 0.87 (t,  $J = 7.0$  Hz, 3H), 0.16 (s, 9H).  $^{13}\text{C}$  NMR (151 MHz,  $\text{CDCl}_3$ )  $\delta$  204.23, 172.12, 67.61, 38.85, 31.85, 29.51, 29.39, 29.30, 29.26, 29.12, 26.53, 23.27, 22.64, 14.08, -1.44. IR ( $\text{cm}^{-1}$ ): 2882, 2856, 1728, 1546, 1418, 1392, 1241, 1111, 1090, 856. MS (ESI) ( $\text{M}+\text{Na}^{+}$ ): 337.16.

### 2-Oxododecyl 2-chloroacetate **3n**

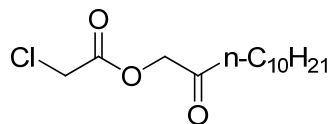

The compound **3n** was prepared in 80% yield according to the general procedure (eluents: ethyl acetate: hexanes = 1:10).  $^1\text{H}$  NMR (500 MHz, Chloroform- $d$ )  $\delta$  4.76 (s, 2H), 4.19 (s, 2H), 2.42 (t,  $J = 7.4$  Hz, 2H), 1.61 (p,  $J = 7.4$  Hz, 2H), 1.35 – 1.16 (m, 14H), 0.87 (t,  $J = 7.0$  Hz, 3H).  $^{13}\text{C}$  NMR (126 MHz,  $\text{CDCl}_3$ )  $\delta$  202.64, 166.73, 68.88, 40.40, 38.79, 31.86, 29.52, 29.39, 29.29, 29.27, 29.09, 23.28, 22.66, 14.09. IR ( $\text{cm}^{-1}$ ): 2883, 2850, 1723, 1137. MS (ESI) ( $\text{M}+\text{Na}^{+}$ ): 299.17.

### 2-oxododecyl 2-phenoxyacetate **3o**

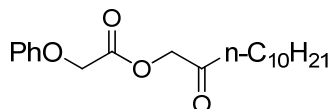

The compound **3o** was prepared in 78 % yield according to the condition A.  $^1\text{H}$  NMR (600 MHz, Chloroform- $d$ )  $\delta$  7.31 (t,  $J = 8.0$  Hz, 2H), 7.00 (t,  $J = 7.4$  Hz, 1H), 6.97 – 6.94 (m, 2H), 4.77 (s, 4H), 2.39 (t,  $J = 7.4$  Hz, 2H), 1.67 – 1.51 (m, 2H), 1.31-1.26 (m, 14H), 0.88 (t,  $J = 7.0$  Hz, 3H).  $^{13}\text{C}$  NMR (151 MHz,  $\text{cdcl}_3$ )  $\delta$  202.96, 168.43, 157.68, 129.58, 121.84, 114.64, 68.21, 64.99,

38.80, 31.86, 29.52, 29.39, 29.29, 29.27, 29.09, 23.28, 22.66, 14.09. IR( $\text{cm}^{-1}$ ):2921, 2851, 1766, 1723, 1600, 1497, 1253, 1195, 1089, 753. MS (ESI/[ $\text{M}+\text{Na}$ ] $^{+}$ ):357.22.

### 1-tert-butyl 2-(2-oxododecyl) pyrrolidine-1,2-dicarboxylate 3p

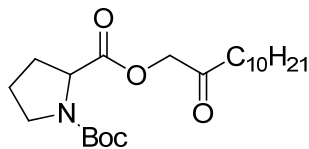

The compound **3o** was prepared in 54% yield according to the condition A.  $^1\text{H}$  NMR (500 MHz, Chloroform- $d$ )  $\delta$  [4.83 (d,  $J = 16.7$  Hz, 4.54 (d,  $J = 16.7$  Hz), 1H], 4.74 – 4.62 (m, 1H), [4.41 (dd,  $J = 7.4, 4.9$  Hz, 4.33 (dd,  $J = 8.6, 4.0$  Hz, ), 1H], 3.54 (dddd,  $J = 20.6, 10.4, 8.0, 4.6$  Hz, 1H), 3.41 (ddt,  $J = 34.8, 10.3, 7.5$  Hz, 1H), 2.40 (td,  $J = 7.4, 3.3$  Hz, 2H), 2.35 – 2.16 (m, 2H), 2.01 (ddq,  $J = 22.1, 16.3, 7.6$  Hz, 1H), 1.89 (tdd,  $J = 12.3, 9.4, 4.5$  Hz, 1H), 1.59 (q,  $J = 7.2$  Hz, 2H), [1.45 (s), 1.41 (s), 9H], 1.29-1.25 (m, 14H), 0.87 (t,  $J = 7.0$  Hz, 3H).  $^{13}\text{C}$  NMR (126 MHz,  $\text{CDCl}_3$ )  $\delta$  204.10, 203.26, 172.49, 172.39, 154.45, 153.75, 79.94, 79.84, 68.12, 67.81, 58.91, 58.61, 46.61, 46.32, 38.80, 38.76, 31.85, 30.98, 30.02, 29.51, 29.39, 29.30, 29.27, 29.10, 28.41, 28.29, 24.29, 23.52, 23.25, 23.19, 22.65, 14.08. IR ( $\text{cm}^{-1}$ ): 3110, 2927, 1698, 1607, 1551, 1434, 1398, 1323, 1214, 876, 863. Ms (ESI) ( $\text{M}+\text{Na}^{+}$ ): 420.30.

### 2-Oxododecyl cyclopropanecarboxylate 3q

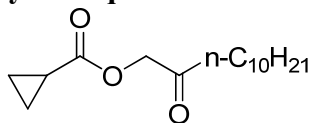

The compound **3q** was prepared in 91% yield according to the general procedure (eluents: ethyl acetate: hexanes = 1:10).  $^1\text{H}$  NMR (500 MHz, Chloroform- $d$ )  $\delta$  4.64 (s, 2H), 2.40 (t,  $J = 7.4$  Hz, 2H), 1.77 – 1.70 (m, 1H), 1.59 (p,  $J = 7.3$  Hz, 2H), 1.34 – 1.20 (m, 14H), 1.10 – 1.04 (m, 2H), 0.96 – 0.90 (m, 2H), 0.87 (t,  $J = 7.0$  Hz, 3H).  $^{13}\text{C}$  NMR (126 MHz,  $\text{CDCl}_3$ )  $\delta$  204.34, 174.19, 67.90, 38.81, 31.86, 29.52, 29.40, 29.31, 29.27, 29.13, 23.26, 22.65, 14.08, 12.59, 8.87. IR ( $\text{cm}^{-1}$ ): 2957, 2922, 2850, 1735, 1730, 1722, 1644, 1466, 1418, 1391, 1201, 1174, 1130, 1093. MS (ESI) ( $\text{M}+\text{Na}^{+}$ ): 291.22.

### 2-Oxododecyl adamantanecarboxylate **3r**

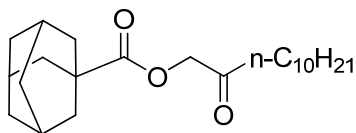

The compound **3r** was prepared in 80% yield according to the general procedure (eluent: ethyl acetate: hexanes = 1:10).  $^1\text{H}$  NMR (600 MHz, Chloroform- $d$ )  $\delta$  4.60 (s, 2H), 2.39 (t,  $J$  = 7.4 Hz, 2H), 2.03 (s, 3H), 1.95 (s, 6H), 1.79 – 1.66 (m, 6H), 1.58 (q,  $J$  = 7.0 Hz, 2H), 1.29-1.24 (m, 14H), 0.87 (t,  $J$  = 6.9 Hz, 3H).  $^{13}\text{C}$  NMR (151 MHz,  $\text{CDCl}_3$ )  $\delta$  204.49, 176.87, 67.67, 40.66, 38.79, 38.75, 36.42, 31.85, 29.51, 29.38, 29.32, 29.25, 29.13, 27.86, 23.17, 22.64, 14.07. IR ( $\text{cm}^{-1}$ ): 2878, 2854, 1730, 1594, 1454, 1415, 1377, 1269, 1233, 1185, 1108, 1077. MS (ESI) ( $\text{M}+\text{Na}^+$ ): 385.32.

### 2-Oxo-2-phenylethyl benzoate **3s**

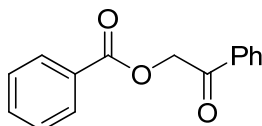

The compound **3s** was prepared in 93% yield according to the general procedure (eluent: ethyl acetate: hexanes = 1:10).  $^1\text{H}$  NMR (500 MHz, Chloroform- $d$ )  $\delta$  8.21– 8.11 (m, 2H), 8.02 – 7.94 (m, 2H), 7.67– 7.57 (m, 2H), 7.55– 7.43 (m, 4H), 5.58 (s, 2H).  $^{13}\text{C}$  NMR (126 MHz,  $\text{CDCl}_3$ )  $\delta$  192.07, 166.02, 134.29, 133.87, 133.33, 129.95, 129.39, 128.87, 128.42, 127.81, 66.44. IR ( $\text{cm}^{-1}$ ): 1720, 1701, 1607, 1583, 1450, 1420, 1375, 1318, 1282, 1125, 1021, 961, 800, 759, 715. MS (ESI) ( $\text{M}+\text{Na}^+$ ): 263.05.

### 2-Cyclohexyl-2-oxoethyl benzoate **3t**

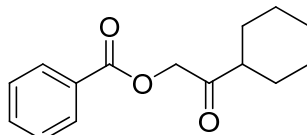

The compound **3t** was prepared in 92% yield according to the general procedure (eluent: ethyl acetate: hexanes = 1:10).  $^1\text{H}$  NMR (500 MHz, Chloroform- $d$ )  $\delta$  8.09 (dd,  $J$  = 8.4, 1.3 Hz, 2H), 7.63 – 7.51 (m, 1H), 7.45 (t,  $J$  = 7.7 Hz, 2H), 4.96 (s, 2H), 2.51 (tt,  $J$  = 11.4, 3.5 Hz, 1H), 1.95 –

1.87 (m, 2H), 1.81 (dt,  $J = 11.9, 3.1$  Hz, 2H), 1.68 (dtd,  $J = 11.0, 3.4, 1.8$  Hz, 1H), 1.45 (qd,  $J = 12.7, 12.3, 3.1$  Hz, 2H), 1.28 (dddd,  $J = 25.2, 15.0, 12.1, 8.9$  Hz, 3H).  $^{13}\text{C}$  NMR (126 MHz,  $\text{CDCl}_3$ )  $\delta$  206.30, 165.87, 133.28, 129.83, 129.35, 128.40, 67.12, 47.41, 28.16, 25.67, 25.46. IR ( $\text{cm}^{-1}$ ): 2872, 2852, 1765, 1720, 1446, 1416, 1340, 1280, 1133, 1068, 914, 744, 712. MS (ESI) ( $\text{M}+\text{Na}^+$ ): 269.08.

### 2-Cyclopropyl-2-oxoethyl benzoate **3u**

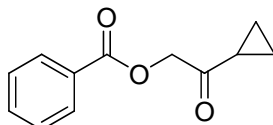

The compound **3u** was prepared in 95% yield according to the general procedure (eluents: ethyl acetate: hexanes = 1:10).  $^1\text{H}$  NMR (500 MHz, Chloroform- $d$ )  $\delta$  8.11 (dt,  $J = 8.4, 1.5$  Hz, 2H), 7.62 – 7.54 (m, 1H), 7.50 – 7.40 (m, 2H), 5.05 (s, 2H), 2.04 (tt,  $J = 7.9, 4.5$  Hz, 1H), 1.27 – 1.07 (m, 2H), 0.99 (dq,  $J = 7.4, 3.7$  Hz, 2H).  $^{13}\text{C}$  NMR (126 MHz,  $\text{CDCl}_3$ )  $\delta$  203.77, 165.82, 133.32, 129.85, 129.29, 128.40, 68.77, 17.22, 11.41. IR ( $\text{cm}^{-1}$ ): 1637, 1602, 1543, 1452, 1406, 1394, 1276, 1069, 1024, 993, 711. MS (ESI) ( $\text{M}+\text{K}^+$ ): 243.01.

### 2-Cyclohexenyl-2-oxoethyl benzoate **3v**

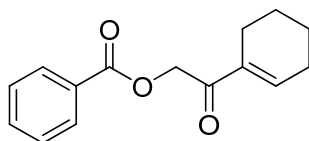

The compound **3v** was prepared in 94% yield according to the general procedure (eluents: ethyl acetate: hexanes = 1:10).  $^1\text{H}$  NMR (500 MHz, Chloroform- $d$ )  $\delta$  8.11 (dd,  $J = 8.3, 1.3$  Hz, 2H), 7.57 (tt,  $J = 7.1, 1.3$  Hz, 1H), 7.50 – 7.38 (m, 2H), 6.93 (p,  $J = 2.1$  Hz, 1H), 5.27 (s, 2H), 2.27 (dq,  $J = 6.2, 4.2, 3.1$  Hz, 4H), 1.65 (ddtt,  $J = 11.5, 9.2, 6.0, 2.4$  Hz, 4H).  $^{13}\text{C}$  NMR (126 MHz,  $\text{CDCl}_3$ )  $\delta$  192.45, 166.15, 140.69, 137.28, 133.17, 129.89, 129.59, 128.35, 65.57, 26.04, 22.83, 21.66, 21.46. IR ( $\text{cm}^{-1}$ ): 2753, 1727, 1708, 1685, 1637, 1602, 1585, 1451, 1426, 1316, 1281, 1213, 1120, 1072, 708. MS (ESI) ( $\text{M}+\text{Na}^+$ ): 267.05.

### 6-Chloro-2-oxohexyl benzoate **3w**

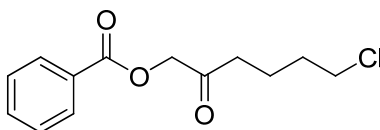

The compound **3w** was prepared in 90% yield according to the general procedure (eluents: ethyl acetate: hexanes = 1:10).  $^1\text{H}$  NMR (500 MHz, Chloroform- $d$ )  $\delta$  8.09 (dt,  $J$  = 8.4, 1.5 Hz, 2H), 7.59 (tt,  $J$  = 7.1, 1.3 Hz, 1H), 7.53 – 7.41 (m, 2H), 4.88 (s, 2H), 3.58 – 3.48 (m, 2H), 2.61 – 2.48 (m, 2H), 1.86 – 1.73 (m, 4H).  $^{13}\text{C}$  NMR (126 MHz,  $\text{CDCl}_3$ )  $\delta$  203.47, 165.84, 133.44, 129.83, 129.10, 128.47, 68.34, 44.49, 37.82, 31.70, 20.45. IR ( $\text{cm}^{-1}$ ): 3065, 2938, 1722, 1633, 1602, 1591, 1585, 1452, 1417, 1316, 1275, 1178, 1128, 1094, 917, 713. MS (ESI) ( $\text{M}+\text{Na}^+$ ): 277.04.

### 6-(1,3-Dioxoisindolin-2-yl)-2-oxohexyl benzoate **3x**

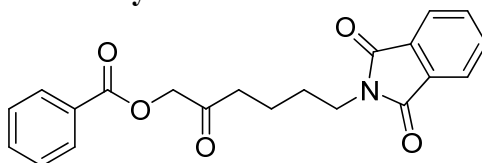

The compound **3x** was prepared in 90% yield according to the general procedure (eluents: ethyl acetate: hexanes = 1:4).  $^1\text{H}$  NMR (500 MHz, Chloroform- $d$ )  $\delta$  8.08 (dt,  $J$  = 8.4, 1.5 Hz, 2H), 7.83 (dd,  $J$  = 5.4, 3.1 Hz, 2H), 7.70 (dd,  $J$  = 5.5, 3.0 Hz, 2H), 7.58 (tt,  $J$  = 7.1, 1.3 Hz, 1H), 7.50 – 7.41 (m, 2H), 4.88 (s, 2H), 3.70 (t,  $J$  = 6.8 Hz, 2H), 2.58 (t,  $J$  = 7.0 Hz, 2H), 1.72 (dddd,  $J$  = 12.2, 10.5, 5.0, 2.6 Hz, 4H).  $^{13}\text{C}$  NMR (126 MHz,  $\text{CDCl}_3$ )  $\delta$  203.47, 168.35, 165.83, 133.90, 133.39, 132.05, 129.86, 129.18, 128.45, 123.21, 68.39, 38.02, 37.34, 27.88, 20.23. IR ( $\text{cm}^{-1}$ ): 2937, 2662, 1771, 1759, 1715, 1625, 1602, 1452, 1437, 1364, 1278, 1120, 1043, 913, 713. MS (ESI) ( $\text{M}+\text{Na}^+$ ): 388.08.

### 6-Acetoxy-2-oxohexyl benzoate **3y**

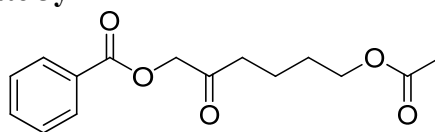

The compound **3y** was prepared in 92% yield according to the general procedure (eluents: ethyl acetate: hexanes = 1:6).  $^1\text{H}$  NMR (500 MHz, Chloroform- $d$ )  $\delta$  8.13 – 8.00 (m, 2H), 7.69 – 7.54 (m, 1H), 7.48 – 7.39 (m, 2H), 4.87 (s, 2H), 4.06 (t,  $J$  = 6.2 Hz, 2H), 2.54 (t,  $J$  = 7.1 Hz, 2H), 2.03 (s, 3H), 1.80 – 1.62 (m, 4H).  $^{13}\text{C}$  NMR (126 MHz,  $\text{CDCl}_3$ )  $\delta$  203.58, 171.07, 165.84, 133.43, 129.83, 129.12, 128.46, 68.36, 63.90, 38.15, 27.93, 20.90, 19.62. IR ( $\text{cm}^{-1}$ ): 2662, 1725, 1629, 1602, 1585, 1453, 1417, 1368, 1316, 1277, 1248, 1114, 1044, 1027, 980, 714. MS (ESI) ( $\text{M}+\text{Na}^+$ ): 301.07.

### 2-Oxo-5-(tosyloxy)pentyl benzoate **3z**

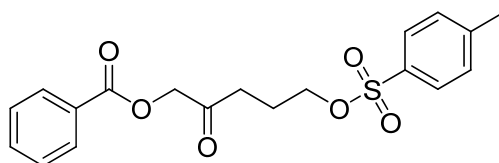

The compound **3z** was prepared in 76% yield according to the general procedure (eluent: ethyl acetate: hexanes = 1:8).  $^1\text{H}$  NMR (500 MHz, Chloroform-*d*)  $\delta$  8.08 (dt,  $J$  = 8.4, 1.5 Hz, 2H), 7.80 – 7.72 (m, 2H), 7.60 (tt,  $J$  = 7.1, 1.3 Hz, 1H), 7.51 – 7.42 (m, 2H), 7.32 (d,  $J$  = 8.0 Hz, 2H), 4.82 (s, 2H), 4.07 (t,  $J$  = 6.0 Hz, 2H), 2.62 (t,  $J$  = 6.9 Hz, 2H), 2.43 (s, 3H), 2.02 – 1.93 (m, 2H).  $^{13}\text{C}$  NMR (126 MHz,  $\text{CDCl}_3$ )  $\delta$  202.83, 165.78, 144.88, 133.48, 132.81, 129.87, 129.83, 129.02, 128.48, 127.82, 69.27, 68.30, 34.26, 22.39, 21.59. IR ( $\text{cm}^{-1}$ ): 2931, 1720, 1638, 1600, 1584, 1493, 1452, 1415, 1366, 1315, 1276, 1172, 1098, 1030, 993, 982, 712. MS (ESI) ( $\text{M}+\text{Na}^+$ ): 399.04.

### 3-Methoxy-2-oxooctyl benzoate **3aa**

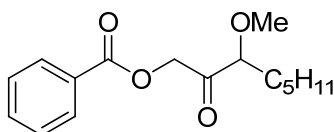

The compound **3aa** was prepared in 59% yield according to the general procedure (eluent: ethyl acetate: hexanes = 1:10).  $^1\text{H}$  NMR (500 MHz, Chloroform-*d*)  $\delta$  8.09 (dt,  $J$  = 8.4, 1.5 Hz, 2H), 7.58 (tt,  $J$  = 7.1, 1.3 Hz, 1H), 7.49 – 7.42 (m, 2H), 5.33 – 4.89 (m, 2H), 3.78 (t,  $J$  = 6.2 Hz, 1H), 3.46 (s, 3H), 1.94 – 1.66 (m, 2H), 1.42 (dtd,  $J$  = 13.8, 8.0, 7.3, 3.9 Hz, 2H), 1.31 (qq,  $J$  = 7.9, 4.6, 3.8 Hz, 4H), 0.89 (t,  $J$  = 7.0 Hz, 3H).  $^{13}\text{C}$  NMR (126 MHz,  $\text{CDCl}_3$ )  $\delta$  205.41, 165.92, 133.27, 129.85, 129.35, 128.39, 86.22, 66.67, 58.51, 31.82, 31.56, 24.43, 22.42, 13.96. IR ( $\text{cm}^{-1}$ ): 2886, 2862, 1726, 1636, 1603, 1453, 1408, 1367, 1316, 1277, 1102, 1072, 866, 712. MS (ESI) ( $\text{M}+\text{Na}^+$ ): 301.12.

### (*E*)-2-oxo-2-phenylethyl but-2-enoate (**3ab**)

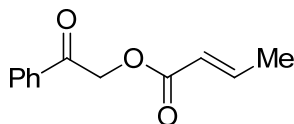

The compound **3ab** was prepared in 93% yield according to the condition A.  $^1\text{H}$  NMR (500 MHz, Chloroform-*d*)  $\delta$  7.95 – 7.89 (m, 2H), 7.61 (t,  $J$  = 7.4 Hz, 1H), 7.49 (t,  $J$  = 7.7 Hz, 2H), 7.18 – 7.05 (m, 1H), 6.01 (dd,  $J$  = 15.6, 1.7 Hz, 1H), 5.39 (s, 2H), 1.93 (dd,  $J$  = 6.9, 1.6 Hz, 3H).  $^{13}\text{C}$  NMR (126 MHz,  $\text{CDCl}_3$ )  $\delta$  192.33, 165.72, 146.38, 134.30, 133.80, 128.82, 127.78, 121.69,

65.81, 18.13. IR (cm<sup>-1</sup>): 2943, 1742, 1707, 1659, 1451, 1373, 1180, 1107, 969, 758. MS (ESI/[M+Na]<sup>+</sup>):227.07

**Condition B: General procedure for synthesis (*E*)-4-phenyl-2-(prop-1-enyl)oxazole **4** in one pot.**

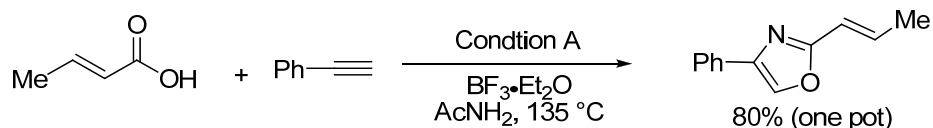

To a 3 dram vial containing 2 mL of chlorobenzene were added sequentially a crotonic acid (0.2 mmol), an alkyne (0.26 mmol), L<sub>5</sub>AuCl (0.01 mmol) and NaBAR<sub>4</sub><sup>F</sup> (0.02 mmol). The resulting mixture was stirred at room temperature. To this vial a solution of 8-methylquinoline *N*-oxide (47.7 mg, 0.3 mmol) in 4 mL of chlorobenzene was then added via a syringe pump in 12 h. Then acetamide (2 mmol) with BF<sub>3</sub>·Et<sub>2</sub>O (2 mmol) was added into the vial and the reaction system was stirred at 135 °C. Upon the completion by TLC, the reaction mixture was concentrated under vacuum. The residue was purified by chromatography on silica gel (eluent: hexanes /ethyl acetate) to afford the desired product (*E*)-4-phenyl-2-(prop-1-enyl)oxazole **4** in 80% yield. <sup>1</sup>H NMR (500 MHz, Chloroform-d) δ 7.80 (s, 1H), 7.73 (d, *J* = 7.1 Hz, 2H), 7.40 (t, *J* = 7.6 Hz, 2H), 7.33 – 7.29 (m, 1H), 6.79 (dd, *J* = 15.9, 6.9 Hz, 1H), 6.37 (dd, *J* = 15.9, 1.7 Hz, 1H), 1.96 (dd, *J* = 6.9, 1.7 Hz, 3H). <sup>13</sup>C NMR (151 MHz, cdcl<sub>3</sub>) δ 161.46, 141.36, 135.51, 132.55, 131.12, 128.67, 127.95, 125.46, 117.87, 18.46. IR (cm<sup>-1</sup>): 3099, 2933, 1442, 1346, 1068, 961, 756. GCMS (*m/z*):185.

### 2-oxo-2-phenylethyl 2-phenylacetate **3ac**

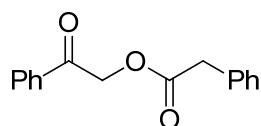

The compound **3ac** was prepared in 88 % yield according to the condition A. <sup>1</sup>H NMR (600 MHz, Chloroform-d) δ 7.92 – 7.87 (m, 2H), 7.60 (t, *J* = 7.4 Hz, 1H), 7.48 (t, *J* = 7.7 Hz, 2H), 7.37 – 7.33 (m, 4H), 7.30-7.28 (m, 1H), 5.35 (s, 2H), 3.83 (s, 2H). <sup>13</sup>C NMR (151 MHz, cdcl<sub>3</sub>) δ 191.98, 171.01, 134.17, 133.85, 133.56, 129.40, 128.83, 128.59, 127.75, 127.19, 66.34, 40.86. IR (cm<sup>-1</sup>): 1745, 1704, 1589, 1450, 1226, 1152, 978. MS (ESI/[M+Na]<sup>+</sup>):277.08



## 2-oxododecyl 2-phenylacetate **3ad**

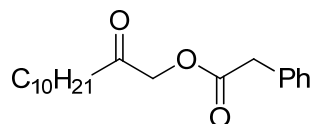

The compound **3ad** was prepared in 85 % yield according to the condition A.  $^1\text{H}$  NMR (600 MHz, Chloroform- $d$ )  $\delta$  7.36 – 7.31 (m, 4H), 7.30 – 7.26 (m, 1H), 4.65 (s, 2H), 3.75 (s, 2H), 2.34 (t,  $J$  = 7.5 Hz, 2H), 1.57 (dd,  $J$  = 12.9, 5.8 Hz, 2H), 1.31-1.25 (m, 14H), 0.88 (t,  $J$  = 7.0 Hz, 3H).  $^{13}\text{C}$  NMR (151 MHz,  $\text{cdCl}_3$ )  $\delta$  203.96, 170.83, 133.46, 129.32, 128.60, 127.23, 68.23, 40.85, 38.79, 31.86, 29.52, 29.40, 29.27, 29.08, 23.21, 22.65, 14.09. IR ( $\text{cm}^{-1}$ ): 2926, 2855, 1734, 1497, 1456, 1244, 1158. MS (ESI/[ $\text{M}+\text{Na}$ ] $^+$ ): 341.22.

## Condition C: General procedure for synthesis 3-phenylfuran-2(5H)-one from 2-oxo-2-ethyl 2-phenylacetates

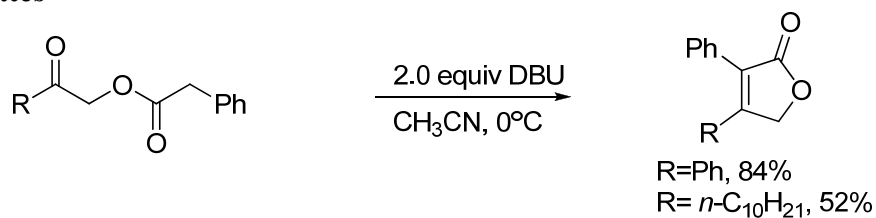

A solution of 1,8-Diazabicycloundec-7-ene(DBU) ( 61mg, 0.4 mmol, 2 equiv) in  $\text{CH}_3\text{CN}$  (0.5 mL) was added drop wise to a stirred solution of 2-oxo-2-ethyl 2-phenylacetate (50.8 mg, 0.2 mmol) in  $\text{CH}_3\text{CN}$  (1 mL) at 0 °C. The mixture was stirred at 0 °C for 5 min, then TLC shows that it has done. Then water was added and extracted with ethyl acetate (3 x 10 mL). The combined extracts were washed with water, and dried over sodium sulfate. Removal of the solvent *in vacuo* gave a residue, which was purified by silica gel column chromatography using ethyl acetate-hexane (1:10, v/v) as eluent to afford 3,4-diphenylfuran-2(5H)-one (39.6mg, 84%).

## 3,4-diphenylfuran-2(5H)-one **6**

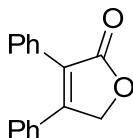

$^1\text{H}$  NMR (600 MHz, Chloroform- $d$ )  $\delta$  7.46 – 7.28 (m, 10H), 5.18 (s, 2H).  $^{13}\text{C}$  NMR (151 MHz,  $\text{cdCl}_3$ )  $\delta$  173.40, 156.05, 130.83, 130.57, 130.13, 129.24, 128.98, 128.78, 128.66, 127.46, 126.17, 70.55. IR ( $\text{cm}^{-1}$ ): 2922, 1752, 1447, 1340, 1037, 1064, 975, 788. MS (ESI/[ $\text{M}+\text{Na}$ ] $^+$ ):259.08.

**4-decyl-3-phenylfuran-2(5H)-one 7**

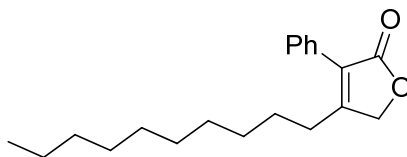

The compound **7** was prepared in 52 % yield according to the condition C. Time 2h.  $^1\text{H}$  NMR (500 MHz, Chloroform- $d$ )  $\delta$  7.46-7.43 (m, 4H), 7.38 (m, 1H), 4.83 (s, 2H), 2.67 – 2.55 (m, 2H), 1.59 – 1.50 (m, 2H), 1.37 – 1.21 (m, 14H), 0.88 (t,  $J = 7.0$  Hz, 3H).  $^{13}\text{C}$  NMR (126 MHz,  $\text{CDCl}_3$ )  $\delta$  173.53, 162.19, 130.03, 128.86, 128.51, 128.41, 126.57, 71.14, 31.84, 29.70, 29.54, 29.49, 29.40, 29.25, 29.16, 27.91, 27.72, 22.65, 14.09. IR ( $\text{cm}^{-1}$ ): 2926, 2855, 1761, 1500, 1446, 1128, 1036, 789. MS (ESI/[ $\text{M}+\text{Na}$ ] $^+$ ): 323.19.

1 **Abstract**2 **Experimental**3 *Crystal data*

|    |                                |                                                         |
|----|--------------------------------|---------------------------------------------------------|
| 4  | $C_{35}H_{52}AuCl_5NP$         | $\gamma = 109.440 (4)^\circ$                            |
| 5  | $M_r = 891.96$                 | $V = 1783.4 (2) \text{ \AA}^3$                          |
| 6  | Triclinic, $P\bar{1}$          | $Z = 2$                                                 |
| 7  | $a = 10.1842 (7) \text{ \AA}$  | Mo $K\alpha$ radiation, $\lambda = 0.71073 \text{ \AA}$ |
| 8  | $b = 12.352 (1) \text{ \AA}$   | $\mu = 4.57 \text{ mm}^{-1}$                            |
| 9  | $c = 15.6495 (11) \text{ \AA}$ | $T = 100 \text{ K}$                                     |
| 10 | $\alpha = 103.871 (4)^\circ$   | $0.30 \times 0.20 \times 0.05 \text{ mm}$               |
| 11 | $\beta = 93.006 (4)^\circ$     |                                                         |

12 *Data collection*

|    |                                                    |                                        |
|----|----------------------------------------------------|----------------------------------------|
| 13 | Bruker Kappa Apex<br>diffractometer                | 20907 measured reflections             |
| 14 | Absorption correction: Multi-scan<br><i>SADABS</i> | 10930 independent reflections          |
| 15 | $T_{\min} = 0.440$ , $T_{\max} = 0.746$            | 9219 reflections with $I > 2\sigma(I)$ |
|    |                                                    | $R_{\text{int}} = 0.046$               |

16 *Refinement*

|    |                                 |                                                |
|----|---------------------------------|------------------------------------------------|
| 17 | $R[F^2 > 2\sigma(F^2)] = 0.053$ | 1 restraint                                    |
| 18 | $wR(F^2) = 0.140$               | H-atom parameters constrained                  |
| 19 | $S = 1.01$                      | $\Delta\rho_{\max} = 5.57 \text{ e \AA}^{-3}$  |
| 20 | 10930 reflections               | $\Delta\rho_{\min} = -5.71 \text{ e \AA}^{-3}$ |
| 21 | 399 parameters                  |                                                |

22 Program(s) used to solve structure: *SHELXS97* (Sheldrick, 2008); program(s) used to refine structure: *SHELXL97*  
23 (Sheldrick, 2008).

24 **References**

25 NOT FOUND

## 1 supplementary materials

## 2 Experimental

## 3 (dayton\_0m)

## 4 Crystal data

|    |                                |                                                         |
|----|--------------------------------|---------------------------------------------------------|
| 5  | $C_{35}H_{52}AuCl_5NP$         | $V = 1783.4 (2) \text{ \AA}^3$                          |
| 6  | $M_r = 891.96$                 | $Z = 2$                                                 |
| 7  | Triclinic, $P\bar{1}$          | $F(000) = 896$                                          |
| 8  | $a = 10.1842 (7) \text{ \AA}$  | $D_x = 1.661 \text{ Mg m}^{-3}$                         |
| 9  | $b = 12.352 (1) \text{ \AA}$   | Mo $K\alpha$ radiation, $\lambda = 0.71073 \text{ \AA}$ |
| 10 | $c = 15.6495 (11) \text{ \AA}$ | $\mu = 4.57 \text{ mm}^{-1}$                            |
| 11 | $\alpha = 103.871 (4)^\circ$   | $T = 100 \text{ K}$                                     |
| 12 | $\beta = 93.006 (4)^\circ$     | Plate, Colorless                                        |
| 13 | $\gamma = 109.440 (4)^\circ$   | $0.30 \times 0.20 \times 0.05 \text{ mm}$               |

## 14 Data collection

|    |                                                     |                                                                                  |
|----|-----------------------------------------------------|----------------------------------------------------------------------------------|
| 15 | Bruker Kappa Apex<br>diffractometer                 | 20907 measured reflections<br>10930 independent reflections                      |
| 16 | Radiation source: fine-focus sealed tube            | 9219 reflections with $I > 2\sigma(I)$                                           |
| 17 | Graphite monochromator                              | $R_{\text{int}} = 0.046$                                                         |
| 18 | $\omega$ scan                                       | $\theta_{\text{max}} = 30.8^\circ$ , $\theta_{\text{min}} = 1.4^\circ$           |
| 19 | Absorption correction: Multi-scan<br><i>SADABS</i>  | $h = -13 \rightarrow 14$<br>$k = -17 \rightarrow 15$<br>$l = -22 \rightarrow 21$ |
| 20 | $T_{\text{min}} = 0.440$ , $T_{\text{max}} = 0.746$ |                                                                                  |

## 21 Refinement

|    |                                                                |                                                          |
|----|----------------------------------------------------------------|----------------------------------------------------------|
| 22 | Refinement on $F^2$                                            | Secondary atom site location: Difference Fourier map     |
| 23 | Least-squares matrix: Full                                     | Hydrogen site location: Inferred from neighbouring sites |
| 24 | $R[F^2 > 2\sigma(F^2)] = 0.053$                                | H-atom parameters constrained                            |
| 25 | $wR(F^2) = 0.140$                                              | $w = 1/[\sigma^2(F_o^2) + (0.0876P)^2 + 3.8471P]$        |
| 26 | $S = 1.01$                                                     | where $P = (F_o^2 + 2F_c^2)/3$                           |
| 27 | 10930 reflections                                              | $(\Delta/\sigma)_{\text{max}} = 0.002$                   |
| 28 | 399 parameters                                                 | $\Delta\rho_{\text{max}} = 5.57 \text{ e \AA}^{-3}$      |
| 29 | 1 restraint                                                    | $\Delta\rho_{\text{min}} = -5.71 \text{ e \AA}^{-3}$     |
| 30 | Primary atom site location: Structure-invariant direct methods |                                                          |

## 31 Special details

- 32 *Geometry.* All esds (except the esd in the dihedral angle between two l.s. planes) are estimated using the full covariance matrix. The cell esds are taken into account individually in the estimation of esds in distances, angles and torsion angles; correlations between esds in cell parameters are only used when they are defined by crystal symmetry. An approximate (isotropic) treatment of cell esds is used for estimating esds involving l.s. planes.
- 33 *Refinement.* Refinement of  $F^2$  against ALL reflections. The weighted R-factor  $wR$  and goodness of fit  $S$  are based on  $F^2$ , conventional R-factors  $R$  are based on  $F$ , with  $F$  set to zero for negative  $F^2$ . The threshold expression of  $F^2 > 2\sigma(F^2)$  is used only for calculating R-factors(gt) etc. and is not relevant to the choice of reflections for refinement. R-factors based on  $F^2$  are statistically about twice as large as those based on  $F$ , and R-factors based on ALL data will be even larger.

34 *Fractional atomic coordinates and isotropic or equivalent isotropic displacement parameters ( $\text{\AA}^2$ )*

| 35 |      | <i>x</i>      | <i>y</i>      | <i>z</i>      | $U_{\text{iso}}^*/U_{\text{eq}}$ | Occ. (<1) |
|----|------|---------------|---------------|---------------|----------------------------------|-----------|
| 36 | Au1  | 1.112082 (17) | 0.700140 (16) | 0.256942 (11) | 0.01466 (7)                      |           |
| 37 | C1   | 0.7999 (5)    | 0.6815 (4)    | 0.3381 (3)    | 0.0137 (8)                       |           |
| 38 | C2   | 0.6531 (5)    | 0.6539 (4)    | 0.3314 (3)    | 0.0160 (9)                       |           |
| 39 | H2   | 0.6017        | 0.6384        | 0.2761        | 0.019*                           |           |
| 40 | C3   | 0.5831 (5)    | 0.6494 (5)    | 0.4049 (3)    | 0.0180 (9)                       |           |
| 41 | H3   | 0.4860        | 0.6294        | 0.3986        | 0.022*                           |           |
| 42 | C4   | 0.6596 (5)    | 0.6750 (5)    | 0.4880 (3)    | 0.0191 (10)                      |           |
| 43 | H4   | 0.6137        | 0.6706        | 0.5376        | 0.023*                           |           |
| 44 | C5   | 0.8047 (5)    | 0.7071 (5)    | 0.4966 (3)    | 0.0178 (9)                       |           |
| 45 | H5   | 0.8557        | 0.7273        | 0.5527        | 0.021*                           |           |
| 46 | C6   | 0.8758 (5)    | 0.7097 (4)    | 0.4230 (3)    | 0.0139 (8)                       |           |
| 47 | C7   | 1.0696 (5)    | 0.6646 (4)    | 0.4803 (3)    | 0.0151 (9)                       |           |
| 48 | H7A  | 1.0225        | 0.5821        | 0.4461        | 0.018*                           |           |
| 49 | H7B  | 1.0401        | 0.6735        | 0.5387        | 0.018*                           |           |
| 50 | C8   | 1.2286 (5)    | 0.6936 (4)    | 0.4902 (3)    | 0.0159 (9)                       |           |
| 51 | H8   | 1.2566        | 0.6777        | 0.4309        | 0.019*                           |           |
| 52 | C9   | 1.3035 (5)    | 0.8250 (5)    | 0.5381 (3)    | 0.0189 (10)                      |           |
| 53 | H9A  | 1.4042        | 0.8447        | 0.5397        | 0.023*                           |           |
| 54 | H9B  | 1.2840        | 0.8397        | 0.5990        | 0.023*                           |           |
| 55 | C10  | 1.2571 (5)    | 0.9050 (5)    | 0.4928 (3)    | 0.0178 (9)                       |           |
| 56 | H10  | 1.2833        | 0.8934        | 0.4328        | 0.021*                           |           |
| 57 | C11  | 1.0971 (5)    | 0.8680 (4)    | 0.4848 (3)    | 0.0163 (9)                       |           |
| 58 | H11A | 1.0698        | 0.8815        | 0.5438        | 0.020*                           |           |
| 59 | H11B | 1.0668        | 0.9171        | 0.4541        | 0.020*                           |           |
| 60 | C12  | 1.2669 (6)    | 0.6141 (6)    | 0.5404 (4)    | 0.0257 (11)                      |           |
| 61 | H12A | 1.3667        | 0.6321        | 0.5462        | 0.039*                           |           |
| 62 | H12B | 1.2193        | 0.5319        | 0.5082        | 0.039*                           |           |
| 63 | H12C | 1.2387        | 0.6282        | 0.5984        | 0.039*                           |           |
| 64 | C13  | 1.3273 (6)    | 1.0368 (5)    | 0.5431 (4)    | 0.0247 (11)                      |           |
| 65 | H13A | 1.2990        | 1.0504        | 0.6011        | 0.037*                           |           |
| 66 | H13B | 1.2995        | 1.0845        | 0.5109        | 0.037*                           |           |
| 67 | H13C | 1.4277        | 1.0584        | 0.5490        | 0.037*                           |           |
| 68 | C14  | 0.7834 (5)    | 0.5222 (4)    | 0.1584 (3)    | 0.0144 (8)                       |           |
| 69 | C15  | 0.8766 (6)    | 0.4927 (5)    | 0.0873 (3)    | 0.0196 (10)                      |           |
| 70 | H15A | 0.8907        | 0.5474        | 0.0504        | 0.024*                           |           |
| 71 | H15B | 0.9679        | 0.5030        | 0.1166        | 0.024*                           |           |
| 72 | C16  | 0.6388 (5)    | 0.5028 (5)    | 0.1090 (3)    | 0.0194 (10)                      |           |
| 73 | H16A | 0.5782        | 0.5205        | 0.1518        | 0.023*                           |           |
| 74 | H16B | 0.6506        | 0.5565        | 0.0714        | 0.023*                           |           |
| 75 | C17  | 0.7637 (6)    | 0.4333 (5)    | 0.2158 (3)    | 0.0192 (10)                      |           |
| 76 | H17A | 0.8543        | 0.4443        | 0.2466        | 0.023*                           |           |
| 77 | H17B | 0.7041        | 0.4485        | 0.2600        | 0.023*                           |           |
| 78 | C18  | 0.6963 (6)    | 0.3048 (5)    | 0.1566 (4)    | 0.0226 (11)                      |           |
| 79 | H18  | 0.6841        | 0.2495        | 0.1937        | 0.027*                           |           |
| 80 | C19  | 0.7894 (6)    | 0.2780 (5)    | 0.0868 (4)    | 0.0245 (11)                      |           |
| 81 | H19A | 0.8810        | 0.2884        | 0.1159        | 0.029*                           |           |
| 82 | H19B | 0.7467        | 0.1961        | 0.0506        | 0.029*                           |           |
| 83 | C20  | 0.8060 (6)    | 0.3631 (5)    | 0.0284 (4)    | 0.0222 (10)                      |           |
| 84 | H20  | 0.8657        | 0.3466        | -0.0164       | 0.027*                           |           |
| 85 | C21  | 0.6619 (6)    | 0.3470 (5)    | -0.0185 (4)   | 0.0247 (11)                      |           |
| 86 | H21A | 0.6733        | 0.4011        | -0.0556       | 0.030*                           |           |

|     |      |              |               |              |             |      |
|-----|------|--------------|---------------|--------------|-------------|------|
| 87  | H21B | 0.6177       | 0.2659        | -0.0562      | 0.030*      |      |
| 88  | C22  | 0.5701 (6)   | 0.3727 (5)    | 0.0515 (4)   | 0.0239 (11) |      |
| 89  | H22  | 0.4774       | 0.3614        | 0.0218       | 0.029*      |      |
| 90  | C23  | 0.5525 (6)   | 0.2878 (5)    | 0.1097 (4)   | 0.0258 (11) |      |
| 91  | H23A | 0.5081       | 0.2061        | 0.0734       | 0.031*      |      |
| 92  | H23B | 0.4925       | 0.3034        | 0.1535       | 0.031*      |      |
| 93  | C24  | 0.9571 (5)   | 0.9173 (4)    | 0.2673 (3)   | 0.0165 (9)  |      |
| 94  | H24A | 0.9173       | 0.9198        | 0.3224       | 0.020*      |      |
| 95  | H24B | 1.0520       | 0.9180        | 0.2784       | 0.020*      |      |
| 96  | C25  | 0.8666 (5)   | 0.8012 (4)    | 0.1950 (3)   | 0.0137 (8)  |      |
| 97  | C26  | 0.7161 (5)   | 0.8041 (4)    | 0.1805 (3)   | 0.0162 (9)  |      |
| 98  | H26A | 0.6561       | 0.7319        | 0.1365       | 0.019*      |      |
| 99  | H26B | 0.6767       | 0.8078        | 0.2357       | 0.019*      |      |
| 100 | C27  | 0.7222 (5)   | 0.9141 (5)    | 0.1484 (4)   | 0.0197 (10) |      |
| 101 | H27  | 0.6267       | 0.9145        | 0.1378       | 0.024*      |      |
| 102 | C28  | 0.8118 (6)   | 1.0275 (5)    | 0.2199 (4)   | 0.0199 (10) |      |
| 103 | H28A | 0.7709       | 1.0309        | 0.2746       | 0.024*      |      |
| 104 | H28B | 0.8144       | 1.0971        | 0.2007       | 0.024*      |      |
| 105 | C29  | 0.9611 (6)   | 1.0271 (5)    | 0.2360 (3)   | 0.0194 (10) |      |
| 106 | H29  | 1.0186       | 1.0998        | 0.2819       | 0.023*      |      |
| 107 | C30  | 1.0254 (6)   | 1.0235 (5)    | 0.1502 (4)   | 0.0214 (10) |      |
| 108 | H30A | 1.1205       | 1.0244        | 0.1605       | 0.026*      |      |
| 109 | H30B | 1.0295       | 1.0933        | 0.1308       | 0.026*      |      |
| 110 | C31  | 0.9359 (6)   | 0.9098 (5)    | 0.0776 (3)   | 0.0183 (9)  |      |
| 111 | H31  | 0.9773       | 0.9078        | 0.0224       | 0.022*      |      |
| 112 | C32  | 0.7869 (6)   | 0.9101 (5)    | 0.0618 (3)   | 0.0202 (10) |      |
| 113 | H32A | 0.7295       | 0.8389        | 0.0160       | 0.024*      |      |
| 114 | H32B | 0.7894       | 0.9791        | 0.0417       | 0.024*      |      |
| 115 | C33  | 0.9306 (5)   | 0.7999 (5)    | 0.1081 (3)   | 0.0169 (9)  |      |
| 116 | H33A | 1.0250       | 0.7987        | 0.1173       | 0.020*      |      |
| 117 | H33B | 0.8744       | 0.7283        | 0.0623       | 0.020*      |      |
| 118 | C34  | 0.4367 (8)   | 0.0249 (7)    | 0.2474 (5)   | 0.0371 (15) |      |
| 119 | H34A | 0.5380       | 0.0653        | 0.2580       | 0.045*      |      |
| 120 | H34B | 0.4156       | -0.0464       | 0.2679       | 0.045*      |      |
| 121 | C35  | 0.2546 (8)   | 0.4180 (6)    | 0.2400 (4)   | 0.0371 (15) |      |
| 122 | Cl1  | 1.34888 (12) | 0.72730 (12)  | 0.26741 (8)  | 0.0209 (2)  |      |
| 123 | Cl2  | 0.37839 (18) | -0.01667 (15) | 0.13308 (10) | 0.0338 (3)  |      |
| 124 | Cl3  | 0.3586 (2)   | 0.1191 (3)    | 0.30921 (13) | 0.0678 (8)  |      |
| 125 | Cl5  | 0.1081 (3)   | 0.38231 (19)  | 0.29787 (12) | 0.0420 (4)  | 0.90 |
| 126 | Cl6  | 0.3403 (11)  | 0.3452 (11)   | 0.2835 (7)   | 0.052 (2)   | 0.20 |
| 127 | Cl7  | 0.20566 (18) | 0.36354 (16)  | 0.12498 (10) | 0.0296 (3)  | 0.90 |
| 128 | N    | 1.0267 (4)   | 0.7418 (4)    | 0.4360 (3)   | 0.0138 (7)  |      |
| 129 | P    | 0.88228 (12) | 0.67502 (11)  | 0.23616 (8)  | 0.0121 (2)  |      |

130 Atomic displacement parameters ( $\text{\AA}^2$ )

|     | $U^{11}$ | $U^{22}$    | $U^{33}$     | $U^{12}$    | $U^{13}$     | $U^{23}$     |              |
|-----|----------|-------------|--------------|-------------|--------------|--------------|--------------|
| 131 |          |             |              |             |              |              |              |
| 132 | Au1      | 0.00833 (9) | 0.01778 (10) | 0.01339 (9) | 0.00242 (6)  | -0.00293 (6) | 0.00028 (6)  |
| 133 | C1       | 0.0055 (17) | 0.017 (2)    | 0.0116 (18) | -0.0011 (16) | -0.0004 (14) | -0.0003 (16) |
| 134 | C2       | 0.0094 (19) | 0.019 (2)    | 0.0142 (19) | 0.0019 (17)  | -0.0044 (16) | -0.0004 (17) |
| 135 | C3       | 0.012 (2)   | 0.020 (2)    | 0.019 (2)   | 0.0042 (18)  | 0.0005 (17)  | 0.0025 (18)  |
| 136 | C4       | 0.015 (2)   | 0.026 (3)    | 0.015 (2)   | 0.0084 (19)  | 0.0006 (17)  | 0.0023 (18)  |
| 137 | C5       | 0.013 (2)   | 0.022 (2)    | 0.0127 (19) | 0.0021 (18)  | -0.0032 (16) | 0.0013 (17)  |
| 138 | C6       | 0.0104 (19) | 0.011 (2)    | 0.016 (2)   | 0.0022 (16)  | -0.0030 (16) | -0.0007 (16) |

|     |     |             |             |             |              |              |              |
|-----|-----|-------------|-------------|-------------|--------------|--------------|--------------|
| 139 | C7  | 0.0104 (19) | 0.014 (2)   | 0.017 (2)   | 0.0021 (16)  | -0.0022 (16) | 0.0007 (16)  |
| 140 | C8  | 0.0078 (19) | 0.019 (2)   | 0.017 (2)   | 0.0027 (17)  | -0.0011 (16) | 0.0030 (17)  |
| 141 | C9  | 0.010 (2)   | 0.023 (2)   | 0.017 (2)   | 0.0008 (18)  | -0.0028 (16) | 0.0025 (18)  |
| 142 | C10 | 0.015 (2)   | 0.017 (2)   | 0.015 (2)   | 0.0019 (18)  | -0.0029 (17) | -0.0001 (17) |
| 143 | C11 | 0.012 (2)   | 0.017 (2)   | 0.016 (2)   | 0.0017 (17)  | -0.0035 (16) | 0.0014 (17)  |
| 144 | C12 | 0.014 (2)   | 0.030 (3)   | 0.035 (3)   | 0.008 (2)    | 0.001 (2)    | 0.014 (2)    |
| 145 | C13 | 0.019 (2)   | 0.019 (3)   | 0.027 (3)   | -0.001 (2)   | 0.000 (2)    | 0.001 (2)    |
| 146 | C14 | 0.0118 (19) | 0.012 (2)   | 0.0152 (19) | 0.0009 (16)  | -0.0012 (16) | 0.0016 (16)  |
| 147 | C15 | 0.016 (2)   | 0.017 (2)   | 0.017 (2)   | 0.0004 (18)  | 0.0008 (17)  | -0.0025 (18) |
| 148 | C16 | 0.012 (2)   | 0.020 (2)   | 0.018 (2)   | 0.0013 (18)  | -0.0086 (17) | -0.0014 (18) |
| 149 | C17 | 0.017 (2)   | 0.018 (2)   | 0.016 (2)   | 0.0033 (19)  | -0.0033 (18) | 0.0007 (18)  |
| 150 | C18 | 0.023 (3)   | 0.013 (2)   | 0.024 (2)   | -0.0001 (19) | -0.004 (2)   | 0.0024 (19)  |
| 151 | C19 | 0.019 (2)   | 0.017 (2)   | 0.026 (3)   | 0.0014 (19)  | -0.006 (2)   | -0.004 (2)   |
| 152 | C20 | 0.023 (3)   | 0.014 (2)   | 0.019 (2)   | -0.0001 (19) | 0.0005 (19)  | -0.0038 (18) |
| 153 | C21 | 0.027 (3)   | 0.018 (2)   | 0.018 (2)   | -0.001 (2)   | -0.009 (2)   | -0.0007 (19) |
| 154 | C22 | 0.018 (2)   | 0.020 (2)   | 0.024 (2)   | 0.003 (2)    | -0.013 (2)   | -0.003 (2)   |
| 155 | C23 | 0.016 (2)   | 0.020 (3)   | 0.030 (3)   | -0.002 (2)   | -0.005 (2)   | 0.001 (2)    |
| 156 | C24 | 0.013 (2)   | 0.015 (2)   | 0.015 (2)   | 0.0002 (17)  | -0.0056 (16) | 0.0005 (16)  |
| 157 | C25 | 0.0114 (19) | 0.015 (2)   | 0.0099 (17) | 0.0014 (16)  | -0.0037 (15) | 0.0009 (15)  |
| 158 | C26 | 0.012 (2)   | 0.015 (2)   | 0.020 (2)   | 0.0048 (17)  | -0.0036 (17) | 0.0023 (17)  |
| 159 | C27 | 0.012 (2)   | 0.023 (2)   | 0.023 (2)   | 0.0067 (19)  | -0.0043 (18) | 0.0029 (19)  |
| 160 | C28 | 0.019 (2)   | 0.017 (2)   | 0.021 (2)   | 0.0078 (19)  | -0.0005 (19) | -0.0005 (18) |
| 161 | C29 | 0.020 (2)   | 0.021 (2)   | 0.014 (2)   | 0.007 (2)    | -0.0038 (18) | -0.0004 (17) |
| 162 | C30 | 0.017 (2)   | 0.017 (2)   | 0.024 (2)   | -0.0001 (19) | -0.0040 (19) | 0.0041 (19)  |
| 163 | C31 | 0.020 (2)   | 0.017 (2)   | 0.014 (2)   | 0.0030 (19)  | 0.0006 (17)  | 0.0027 (17)  |
| 164 | C32 | 0.019 (2)   | 0.021 (2)   | 0.016 (2)   | 0.0039 (19)  | -0.0056 (18) | 0.0024 (18)  |
| 165 | C33 | 0.018 (2)   | 0.020 (2)   | 0.0114 (19) | 0.0076 (18)  | -0.0002 (16) | 0.0011 (17)  |
| 166 | C34 | 0.035 (3)   | 0.035 (3)   | 0.033 (3)   | 0.008 (3)    | -0.008 (3)   | 0.003 (3)    |
| 167 | C35 | 0.035 (3)   | 0.039 (4)   | 0.027 (3)   | 0.009 (3)    | -0.009 (3)   | -0.002 (3)   |
| 168 | Cl1 | 0.0106 (5)  | 0.0310 (7)  | 0.0198 (5)  | 0.0073 (5)   | -0.0007 (4)  | 0.0052 (5)   |
| 169 | Cl2 | 0.0334 (8)  | 0.0402 (8)  | 0.0269 (7)  | 0.0192 (7)   | -0.0008 (6)  | -0.0004 (6)  |
| 170 | Cl3 | 0.0350 (9)  | 0.1043 (19) | 0.0369 (9)  | 0.0315 (11)  | -0.0156 (8)  | -0.0350 (11) |
| 171 | Cl5 | 0.0626 (13) | 0.0465 (11) | 0.0223 (7)  | 0.0231 (10)  | 0.0129 (8)   | 0.0129 (7)   |
| 172 | Cl6 | 0.043 (5)   | 0.082 (8)   | 0.040 (5)   | 0.029 (5)    | 0.009 (4)    | 0.020 (5)    |
| 173 | Cl7 | 0.0287 (8)  | 0.0355 (8)  | 0.0168 (6)  | 0.0052 (6)   | 0.0007 (5)   | 0.0025 (6)   |
| 174 | N   | 0.0095 (17) | 0.0145 (18) | 0.0124 (16) | 0.0014 (14)  | -0.0036 (13) | 0.0001 (14)  |
| 175 | P   | 0.0078 (5)  | 0.0132 (5)  | 0.0106 (5)  | 0.0009 (4)   | -0.0028 (4)  | -0.0002 (4)  |

176 *Geometric parameters (Å, °)*

|     |         |             |          |           |
|-----|---------|-------------|----------|-----------|
| 177 | Au1—P   | 2.2512 (12) | C18—C19  | 1.531 (8) |
| 178 | Au1—Cl1 | 2.3128 (12) | C18—H18  | 0.9800    |
| 179 | C1—C6   | 1.405 (6)   | C19—C20  | 1.526 (9) |
| 180 | C1—C2   | 1.411 (6)   | C19—H19A | 0.9700    |
| 181 | C1—P    | 1.838 (5)   | C19—H19B | 0.9700    |
| 182 | C2—C3   | 1.387 (7)   | C20—C21  | 1.534 (8) |
| 183 | C2—H2   | 0.9300      | C20—H20  | 0.9800    |
| 184 | C3—C4   | 1.389 (7)   | C21—C22  | 1.521 (9) |
| 185 | C3—H3   | 0.9300      | C21—H21A | 0.9700    |
| 186 | C4—C5   | 1.387 (7)   | C21—H21B | 0.9700    |
| 187 | C4—H4   | 0.9300      | C22—C23  | 1.521 (9) |
| 188 | C5—C6   | 1.393 (7)   | C22—H22  | 0.9800    |
| 189 | C5—H5   | 0.9300      | C23—H23A | 0.9700    |
| 190 | C6—N    | 1.444 (6)   | C23—H23B | 0.9700    |

|     |           |            |               |           |
|-----|-----------|------------|---------------|-----------|
| 191 | C7—N      | 1.464 (6)  | C24—C29       | 1.537 (8) |
| 192 | C7—C8     | 1.528 (7)  | C24—C25       | 1.555 (6) |
| 193 | C7—H7A    | 0.9700     | C24—H24A      | 0.9700    |
| 194 | C7—H7B    | 0.9700     | C24—H24B      | 0.9700    |
| 195 | C8—C9     | 1.519 (7)  | C25—C33       | 1.537 (7) |
| 196 | C8—C12    | 1.526 (8)  | C25—C26       | 1.551 (7) |
| 197 | C8—H8     | 0.9800     | C25—P         | 1.872 (5) |
| 198 | C9—C10    | 1.522 (8)  | C26—C27       | 1.541 (7) |
| 199 | C9—H9A    | 0.9700     | C26—H26A      | 0.9700    |
| 200 | C9—H9B    | 0.9700     | C26—H26B      | 0.9700    |
| 201 | C10—C13   | 1.528 (7)  | C27—C28       | 1.529 (7) |
| 202 | C10—C11   | 1.528 (7)  | C27—C32       | 1.535 (8) |
| 203 | C10—H10   | 0.9800     | C27—H27       | 0.9800    |
| 204 | C11—N     | 1.468 (6)  | C28—C29       | 1.530 (7) |
| 205 | C11—H11A  | 0.9700     | C28—H28A      | 0.9700    |
| 206 | C11—H11B  | 0.9700     | C28—H28B      | 0.9700    |
| 207 | C12—H12A  | 0.9600     | C29—C30       | 1.522 (8) |
| 208 | C12—H12B  | 0.9600     | C29—H29       | 0.9800    |
| 209 | C12—H12C  | 0.9600     | C30—C31       | 1.539 (7) |
| 210 | C13—H13A  | 0.9600     | C30—H30A      | 0.9700    |
| 211 | C13—H13B  | 0.9600     | C30—H30B      | 0.9700    |
| 212 | C13—H13C  | 0.9600     | C31—C32       | 1.527 (8) |
| 213 | C14—C16   | 1.543 (7)  | C31—C33       | 1.528 (7) |
| 214 | C14—C17   | 1.548 (7)  | C31—H31       | 0.9800    |
| 215 | C14—C15   | 1.556 (7)  | C32—H32A      | 0.9700    |
| 216 | C14—P     | 1.887 (5)  | C32—H32B      | 0.9700    |
| 217 | C15—C20   | 1.545 (7)  | C33—H33A      | 0.9700    |
| 218 | C15—H15A  | 0.9700     | C33—H33B      | 0.9700    |
| 219 | C15—H15B  | 0.9700     | C34—Cl2       | 1.750 (7) |
| 220 | C16—C22   | 1.540 (7)  | C34—Cl3       | 1.755 (8) |
| 221 | C16—H16A  | 0.9700     | C34—H34A      | 0.9700    |
| 222 | C16—H16B  | 0.9700     | C34—H34B      | 0.9700    |
| 223 | C17—C18   | 1.534 (7)  | C35—Cl6       | 1.669 (8) |
| 224 | C17—H17A  | 0.9700     | C35—Cl7       | 1.744 (7) |
| 225 | C17—H17B  | 0.9700     | C35—Cl5       | 1.771 (8) |
| 226 | C18—C23   | 1.529 (8)  |               |           |
| 227 |           |            |               |           |
| 228 | P—Au1—Cl1 | 175.65 (4) | C19—C20—H20   | 109.3     |
| 229 | C6—C1—C2  | 117.9 (4)  | C21—C20—H20   | 109.3     |
| 230 | C6—C1—P   | 123.1 (3)  | C15—C20—H20   | 109.3     |
| 231 | C2—C1—P   | 119.0 (3)  | C22—C21—C20   | 108.9 (4) |
| 232 | C3—C2—C1  | 121.9 (4)  | C22—C21—H21A  | 109.9     |
| 233 | C3—C2—H2  | 119.1      | C20—C21—H21A  | 109.9     |
| 234 | C1—C2—H2  | 119.1      | C22—C21—H21B  | 109.9     |
| 235 | C2—C3—C4  | 119.4 (5)  | C20—C21—H21B  | 109.9     |
| 236 | C2—C3—H3  | 120.3      | H21A—C21—H21B | 108.3     |
| 237 | C4—C3—H3  | 120.3      | C21—C22—C23   | 109.8 (5) |
| 238 | C5—C4—C3  | 119.6 (5)  | C21—C22—C16   | 109.5 (5) |
| 239 | C5—C4—H4  | 120.2      | C23—C22—C16   | 110.0 (5) |
| 240 | C3—C4—H4  | 120.2      | C21—C22—H22   | 109.2     |
| 241 | C4—C5—C6  | 121.5 (4)  | C23—C22—H22   | 109.2     |
| 242 | C4—C5—H5  | 119.3      | C16—C22—H22   | 109.2     |
| 243 | C6—C5—H5  | 119.3      | C22—C23—C18   | 109.8 (5) |
| 244 | C5—C6—C1  | 119.7 (4)  | C22—C23—H23A  | 109.7     |



|     |               |           |               |           |
|-----|---------------|-----------|---------------|-----------|
| 245 | C5—C6—N       | 118.9 (4) | C18—C23—H23A  | 109.7     |
| 246 | C1—C6—N       | 121.5 (4) | C22—C23—H23B  | 109.7     |
| 247 | N—C7—C8       | 112.3 (4) | C18—C23—H23B  | 109.7     |
| 248 | N—C7—H7A      | 109.1     | H23A—C23—H23B | 108.2     |
| 249 | C8—C7—H7A     | 109.1     | C29—C24—C25   | 109.9 (4) |
| 250 | N—C7—H7B      | 109.1     | C29—C24—H24A  | 109.7     |
| 251 | C8—C7—H7B     | 109.1     | C25—C24—H24A  | 109.7     |
| 252 | H7A—C7—H7B    | 107.9     | C29—C24—H24B  | 109.7     |
| 253 | C9—C8—C12     | 111.4 (4) | C25—C24—H24B  | 109.7     |
| 254 | C9—C8—C7      | 109.4 (4) | H24A—C24—H24B | 108.2     |
| 255 | C12—C8—C7     | 109.6 (4) | C33—C25—C26   | 109.5 (4) |
| 256 | C9—C8—H8      | 108.8     | C33—C25—C24   | 108.7 (4) |
| 257 | C12—C8—H8     | 108.8     | C26—C25—C24   | 107.5 (4) |
| 258 | C7—C8—H8      | 108.8     | C33—C25—P     | 108.7 (3) |
| 259 | C8—C9—C10     | 111.9 (4) | C26—C25—P     | 116.2 (3) |
| 260 | C8—C9—H9A     | 109.2     | C24—C25—P     | 105.9 (3) |
| 261 | C10—C9—H9A    | 109.2     | C27—C26—C25   | 109.5 (4) |
| 262 | C8—C9—H9B     | 109.2     | C27—C26—H26A  | 109.8     |
| 263 | C10—C9—H9B    | 109.2     | C25—C26—H26A  | 109.8     |
| 264 | H9A—C9—H9B    | 107.9     | C27—C26—H26B  | 109.8     |
| 265 | C9—C10—C13    | 112.0 (4) | C25—C26—H26B  | 109.8     |
| 266 | C9—C10—C11    | 109.1 (4) | H26A—C26—H26B | 108.2     |
| 267 | C13—C10—C11   | 110.3 (4) | C28—C27—C32   | 109.4 (4) |
| 268 | C9—C10—H10    | 108.5     | C28—C27—C26   | 109.4 (4) |
| 269 | C13—C10—H10   | 108.5     | C32—C27—C26   | 110.2 (4) |
| 270 | C11—C10—H10   | 108.5     | C28—C27—H27   | 109.3     |
| 271 | N—C11—C10     | 111.4 (4) | C32—C27—H27   | 109.3     |
| 272 | N—C11—H11A    | 109.3     | C26—C27—H27   | 109.3     |
| 273 | C10—C11—H11A  | 109.3     | C27—C28—C29   | 109.3 (4) |
| 274 | N—C11—H11B    | 109.3     | C27—C28—H28A  | 109.8     |
| 275 | C10—C11—H11B  | 109.3     | C29—C28—H28A  | 109.8     |
| 276 | H11A—C11—H11B | 108.0     | C27—C28—H28B  | 109.8     |
| 277 | C8—C12—H12A   | 109.5     | C29—C28—H28B  | 109.8     |
| 278 | C8—C12—H12B   | 109.5     | H28A—C28—H28B | 108.3     |
| 279 | H12A—C12—H12B | 109.5     | C30—C29—C28   | 109.6 (4) |
| 280 | C8—C12—H12C   | 109.5     | C30—C29—C24   | 109.4 (4) |
| 281 | H12A—C12—H12C | 109.5     | C28—C29—C24   | 109.8 (4) |
| 282 | H12B—C12—H12C | 109.5     | C30—C29—H29   | 109.3     |
| 283 | C10—C13—H13A  | 109.5     | C28—C29—H29   | 109.3     |
| 284 | C10—C13—H13B  | 109.5     | C24—C29—H29   | 109.3     |
| 285 | H13A—C13—H13B | 109.5     | C29—C30—C31   | 109.8 (4) |
| 286 | C10—C13—H13C  | 109.5     | C29—C30—H30A  | 109.7     |
| 287 | H13A—C13—H13C | 109.5     | C31—C30—H30A  | 109.7     |
| 288 | H13B—C13—H13C | 109.5     | C29—C30—H30B  | 109.7     |
| 289 | C16—C14—C17   | 109.1 (4) | C31—C30—H30B  | 109.7     |
| 290 | C16—C14—C15   | 107.7 (4) | H30A—C30—H30B | 108.2     |
| 291 | C17—C14—C15   | 107.8 (4) | C32—C31—C33   | 109.3 (4) |
| 292 | C16—C14—P     | 116.9 (3) | C32—C31—C30   | 109.0 (4) |
| 293 | C17—C14—P     | 106.1 (3) | C33—C31—C30   | 109.6 (4) |
| 294 | C15—C14—P     | 108.9 (3) | C32—C31—H31   | 109.7     |
| 295 | C20—C15—C14   | 110.5 (4) | C33—C31—H31   | 109.7     |
| 296 | C20—C15—H15A  | 109.5     | C30—C31—H31   | 109.7     |
| 297 | C14—C15—H15A  | 109.5     | C31—C32—C27   | 109.7 (4) |
| 298 | C20—C15—H15B  | 109.5     | C31—C32—H32A  | 109.7     |

|     |                 |            |                 |             |
|-----|-----------------|------------|-----------------|-------------|
| 299 | C14—C15—H15B    | 109.5      | C27—C32—H32A    | 109.7       |
| 300 | H15A—C15—H15B   | 108.1      | C31—C32—H32B    | 109.7       |
| 301 | C22—C16—C14     | 110.2 (4)  | C27—C32—H32B    | 109.7       |
| 302 | C22—C16—H16A    | 109.6      | H32A—C32—H32B   | 108.2       |
| 303 | C14—C16—H16A    | 109.6      | C31—C33—C25     | 110.7 (4)   |
| 304 | C22—C16—H16B    | 109.6      | C31—C33—H33A    | 109.5       |
| 305 | C14—C16—H16B    | 109.6      | C25—C33—H33A    | 109.5       |
| 306 | H16A—C16—H16B   | 108.1      | C31—C33—H33B    | 109.5       |
| 307 | C18—C17—C14     | 110.0 (4)  | C25—C33—H33B    | 109.5       |
| 308 | C18—C17—H17A    | 109.7      | H33A—C33—H33B   | 108.1       |
| 309 | C14—C17—H17A    | 109.7      | Cl2—C34—Cl3     | 112.8 (4)   |
| 310 | C18—C17—H17B    | 109.7      | Cl2—C34—H34A    | 109.0       |
| 311 | C14—C17—H17B    | 109.7      | Cl3—C34—H34A    | 109.0       |
| 312 | H17A—C17—H17B   | 108.2      | Cl2—C34—H34B    | 109.0       |
| 313 | C23—C18—C19     | 109.3 (5)  | Cl3—C34—H34B    | 109.0       |
| 314 | C23—C18—C17     | 109.2 (5)  | H34A—C34—H34B   | 107.8       |
| 315 | C19—C18—C17     | 110.7 (4)  | Cl6—C35—Cl7     | 114.1 (5)   |
| 316 | C23—C18—H18     | 109.2      | Cl6—C35—Cl5     | 96.4 (5)    |
| 317 | C19—C18—H18     | 109.2      | Cl7—C35—Cl5     | 112.0 (4)   |
| 318 | C17—C18—H18     | 109.2      | C6—N—C7         | 111.8 (4)   |
| 319 | C20—C19—C18     | 108.9 (5)  | C6—N—C11        | 111.2 (4)   |
| 320 | C20—C19—H19A    | 109.9      | C7—N—C11        | 111.1 (4)   |
| 321 | C18—C19—H19A    | 109.9      | C1—P—C25        | 105.6 (2)   |
| 322 | C20—C19—H19B    | 109.9      | C1—P—C14        | 106.2 (2)   |
| 323 | C18—C19—H19B    | 109.9      | C25—P—C14       | 114.3 (2)   |
| 324 | H19A—C19—H19B   | 108.3      | C1—P—Au1        | 114.29 (15) |
| 325 | C19—C20—C21     | 110.4 (5)  | C25—P—Au1       | 107.81 (16) |
| 326 | C19—C20—C15     | 108.9 (4)  | C14—P—Au1       | 108.69 (16) |
| 327 | C21—C20—C15     | 109.6 (5)  |                 |             |
| 328 |                 |            |                 |             |
| 329 | C6—C1—C2—C3     | -2.7 (7)   | C32—C27—C28—C29 | -60.0 (6)   |
| 330 | P—C1—C2—C3      | 175.6 (4)  | C26—C27—C28—C29 | 60.7 (6)    |
| 331 | C1—C2—C3—C4     | 1.3 (8)    | C27—C28—C29—C30 | 60.2 (6)    |
| 332 | C2—C3—C4—C5     | 1.3 (8)    | C27—C28—C29—C24 | -60.0 (6)   |
| 333 | C3—C4—C5—C6     | -2.6 (8)   | C25—C24—C29—C30 | -60.0 (5)   |
| 334 | C4—C5—C6—C1     | 1.2 (8)    | C25—C24—C29—C28 | 60.3 (5)    |
| 335 | C4—C5—C6—N      | -178.9 (5) | C28—C29—C30—C31 | -60.2 (6)   |
| 336 | C2—C1—C6—C5     | 1.4 (7)    | C24—C29—C30—C31 | 60.3 (5)    |
| 337 | P—C1—C6—C5      | -176.9 (4) | C29—C30—C31—C32 | 59.7 (6)    |
| 338 | C2—C1—C6—N      | -178.4 (4) | C29—C30—C31—C33 | -59.8 (6)   |
| 339 | P—C1—C6—N       | 3.3 (7)    | C33—C31—C32—C27 | 60.2 (5)    |
| 340 | N—C7—C8—C9      | 55.0 (5)   | C30—C31—C32—C27 | -59.6 (6)   |
| 341 | N—C7—C8—C12     | 177.4 (4)  | C28—C27—C32—C31 | 60.2 (6)    |
| 342 | C12—C8—C9—C10   | -175.3 (4) | C26—C27—C32—C31 | -60.0 (5)   |
| 343 | C7—C8—C9—C10    | -53.9 (6)  | C32—C31—C33—C25 | -60.0 (5)   |
| 344 | C8—C9—C10—C13   | 177.5 (4)  | C30—C31—C33—C25 | 59.3 (5)    |
| 345 | C8—C9—C10—C11   | 55.1 (5)   | C26—C25—C33—C31 | 58.7 (5)    |
| 346 | C9—C10—C11—N    | -57.1 (5)  | C24—C25—C33—C31 | -58.5 (5)   |
| 347 | C13—C10—C11—N   | 179.5 (4)  | P—C25—C33—C31   | -173.4 (3)  |
| 348 | C16—C14—C15—C20 | -58.3 (6)  | C5—C6—N—C7      | 56.2 (6)    |
| 349 | C17—C14—C15—C20 | 59.3 (5)   | C1—C6—N—C7      | -123.9 (5)  |
| 350 | P—C14—C15—C20   | 174.0 (4)  | C5—C6—N—C11     | -68.5 (6)   |
| 351 | C17—C14—C16—C22 | -57.5 (6)  | C1—C6—N—C11     | 111.3 (5)   |
| 352 | C15—C14—C16—C22 | 59.3 (6)   | C8—C7—N—C6      | 177.1 (4)   |

---

|     |                 |            |               |            |
|-----|-----------------|------------|---------------|------------|
| 353 | P—C14—C16—C22   | -177.8 (4) | C8—C7—N—C11   | -58.1 (5)  |
| 354 | C16—C14—C17—C18 | 58.6 (5)   | C10—C11—N—C6  | -175.8 (4) |
| 355 | C15—C14—C17—C18 | -58.1 (5)  | C10—C11—N—C7  | 59.1 (5)   |
| 356 | P—C14—C17—C18   | -174.6 (4) | C6—C1—P—C25   | -113.2 (4) |
| 357 | C14—C17—C18—C23 | -60.4 (6)  | C2—C1—P—C25   | 68.5 (4)   |
| 358 | C14—C17—C18—C19 | 60.0 (6)   | C6—C1—P—C14   | 125.0 (4)  |
| 359 | C23—C18—C19—C20 | 59.6 (5)   | C2—C1—P—C14   | -53.3 (5)  |
| 360 | C17—C18—C19—C20 | -60.7 (6)  | C6—C1—P—Au1   | 5.1 (5)    |
| 361 | C18—C19—C20—C21 | -59.9 (5)  | C2—C1—P—Au1   | -173.1 (3) |
| 362 | C18—C19—C20—C15 | 60.5 (6)   | C33—C25—P—C1  | -178.7 (3) |
| 363 | C14—C15—C20—C19 | -61.3 (6)  | C26—C25—P—C1  | -54.6 (4)  |
| 364 | C14—C15—C20—C21 | 59.6 (6)   | C24—C25—P—C1  | 64.6 (4)   |
| 365 | C19—C20—C21—C22 | 59.7 (6)   | C33—C25—P—C14 | -62.3 (4)  |
| 366 | C15—C20—C21—C22 | -60.3 (6)  | C26—C25—P—C14 | 61.8 (4)   |
| 367 | C20—C21—C22—C23 | -59.5 (6)  | C24—C25—P—C14 | -178.9 (3) |
| 368 | C20—C21—C22—C16 | 61.3 (6)   | C33—C25—P—Au1 | 58.7 (3)   |
| 369 | C14—C16—C22—C21 | -62.0 (6)  | C26—C25—P—Au1 | -177.2 (3) |
| 370 | C14—C16—C22—C23 | 58.7 (6)   | C24—C25—P—Au1 | -58.0 (3)  |
| 371 | C21—C22—C23—C18 | 60.5 (6)   | C16—C14—P—C1  | 77.9 (4)   |
| 372 | C16—C22—C23—C18 | -60.1 (6)  | C17—C14—P—C1  | -44.0 (4)  |
| 373 | C19—C18—C23—C22 | -60.3 (6)  | C15—C14—P—C1  | -159.8 (3) |
| 374 | C17—C18—C23—C22 | 60.9 (6)   | C16—C14—P—C25 | -38.2 (4)  |
| 375 | C29—C24—C25—C33 | 58.7 (5)   | C17—C14—P—C25 | -160.1 (3) |
| 376 | C29—C24—C25—C26 | -59.9 (5)  | C15—C14—P—C25 | 84.1 (4)   |
| 377 | C29—C24—C25—P   | 175.3 (3)  | C16—C14—P—Au1 | -158.7 (3) |
| 378 | C33—C25—C26—C27 | -57.4 (5)  | C17—C14—P—Au1 | 79.5 (3)   |
| 379 | C24—C25—C26—C27 | 60.6 (5)   | C15—C14—P—Au1 | -36.4 (4)  |
| 380 | P—C25—C26—C27   | 179.0 (3)  | Cl1—Au1—P—C1  | -168.9 (6) |
| 381 | C25—C26—C27—C28 | -61.9 (5)  | Cl1—Au1—P—C25 | -51.8 (6)  |
| 382 | C25—C26—C27—C32 | 58.4 (5)   | Cl1—Au1—P—C14 | 72.6 (6)   |

---

Title jkg-IV-80-ligand-H  
Solvent CDCl3  
Spectrometer Frequency 499.86

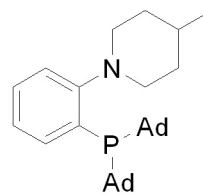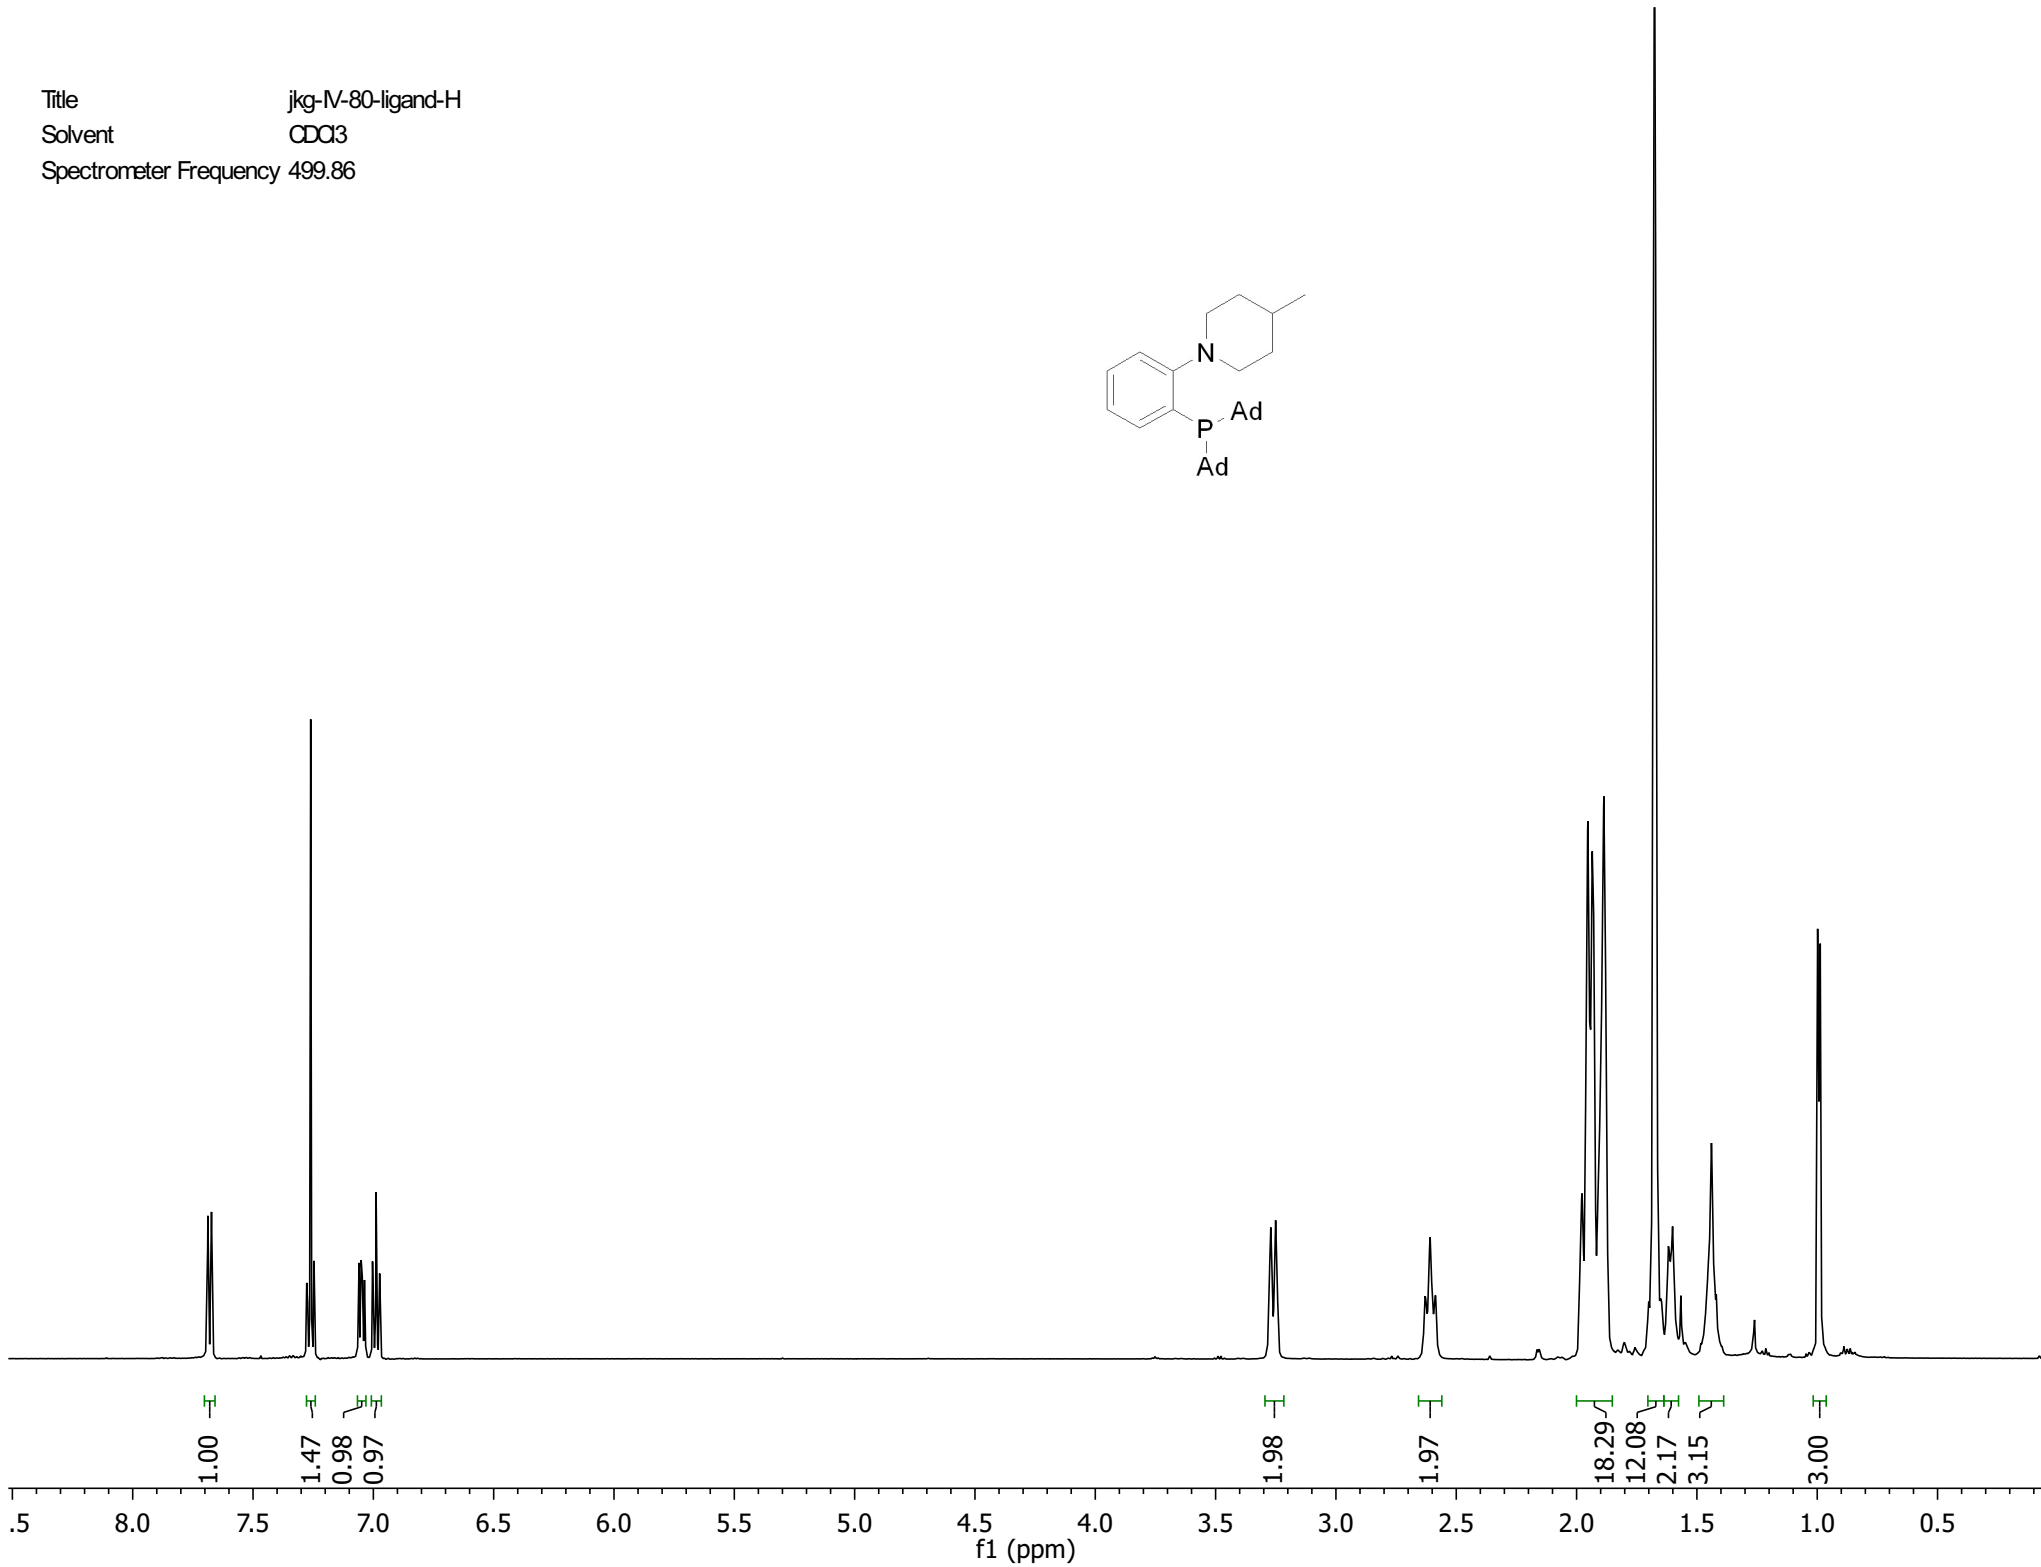

Title jkg-IV-80-ligand-C  
Solvent CDCl3  
Spectrometer Frequency 125.70

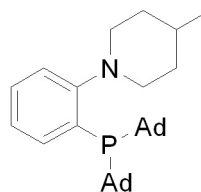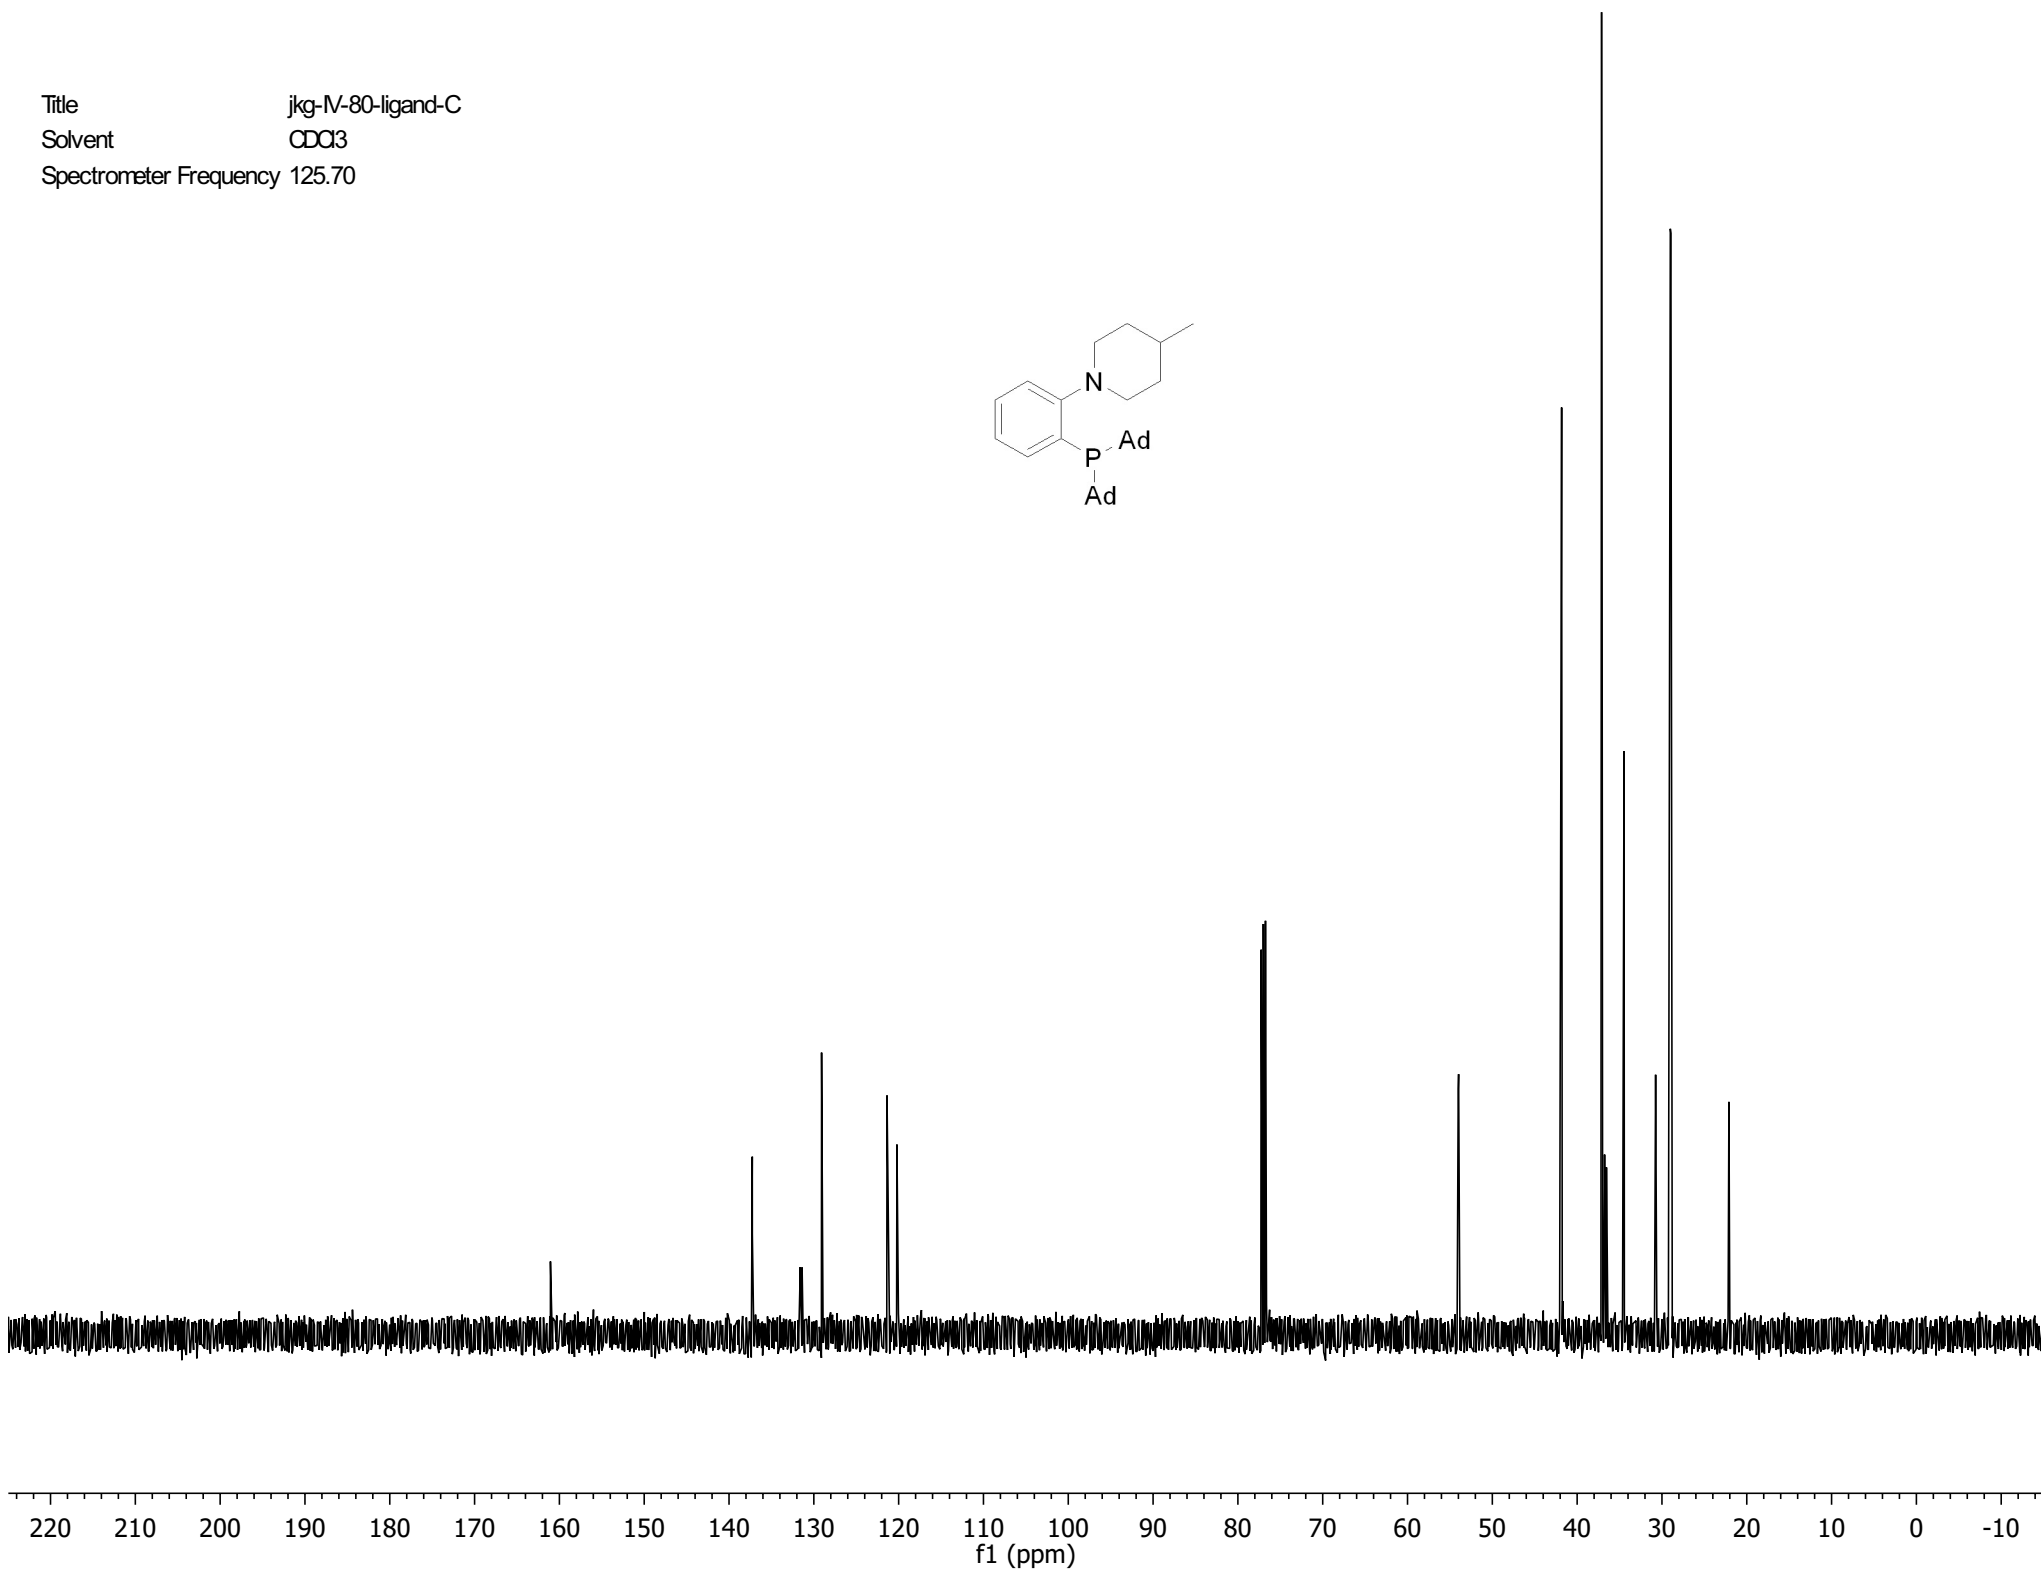

Title jkg-IV-80-P31  
Solvent cdcl3  
Spectrometer Frequency 161.90

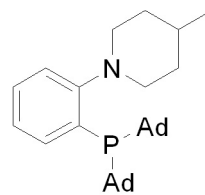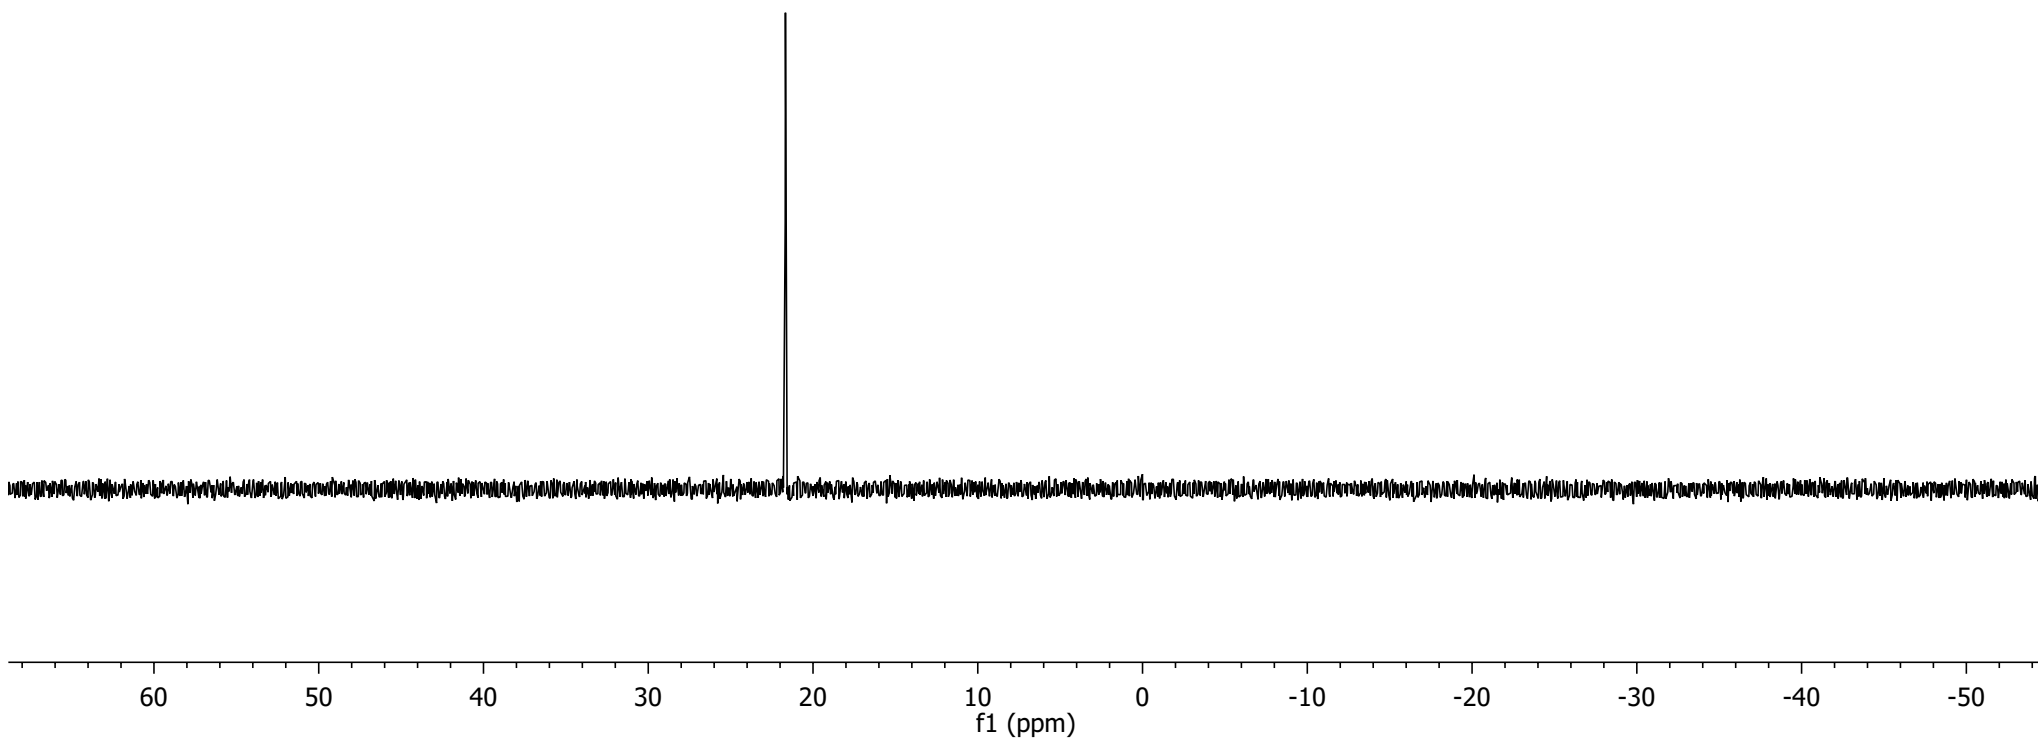

Title jkg-IV-81A-LAuCl-H  
Solvent CDCl3  
Spectrometer Frequency 499.86

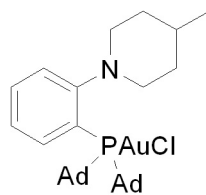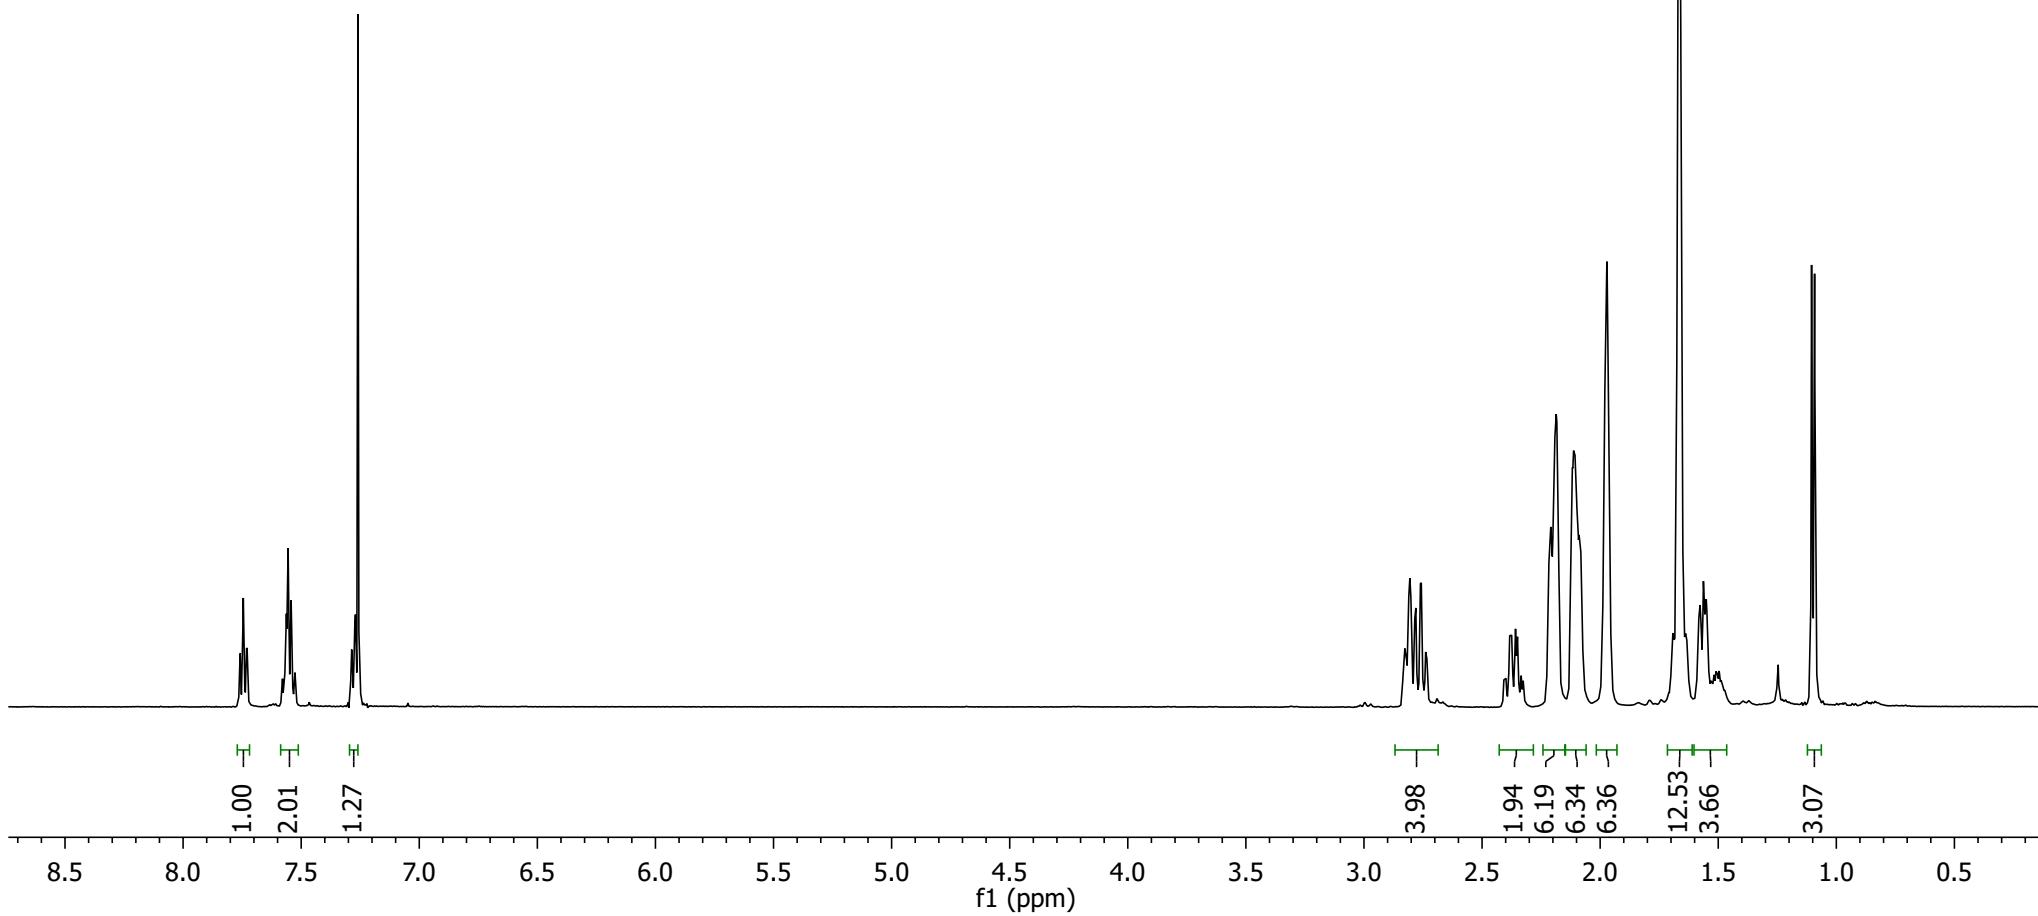

Title jkg-IV-81A-LAuCl-C  
Solvent CDCl3  
Spectrometer Frequency 125.70

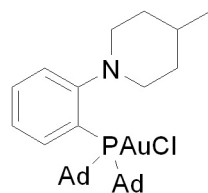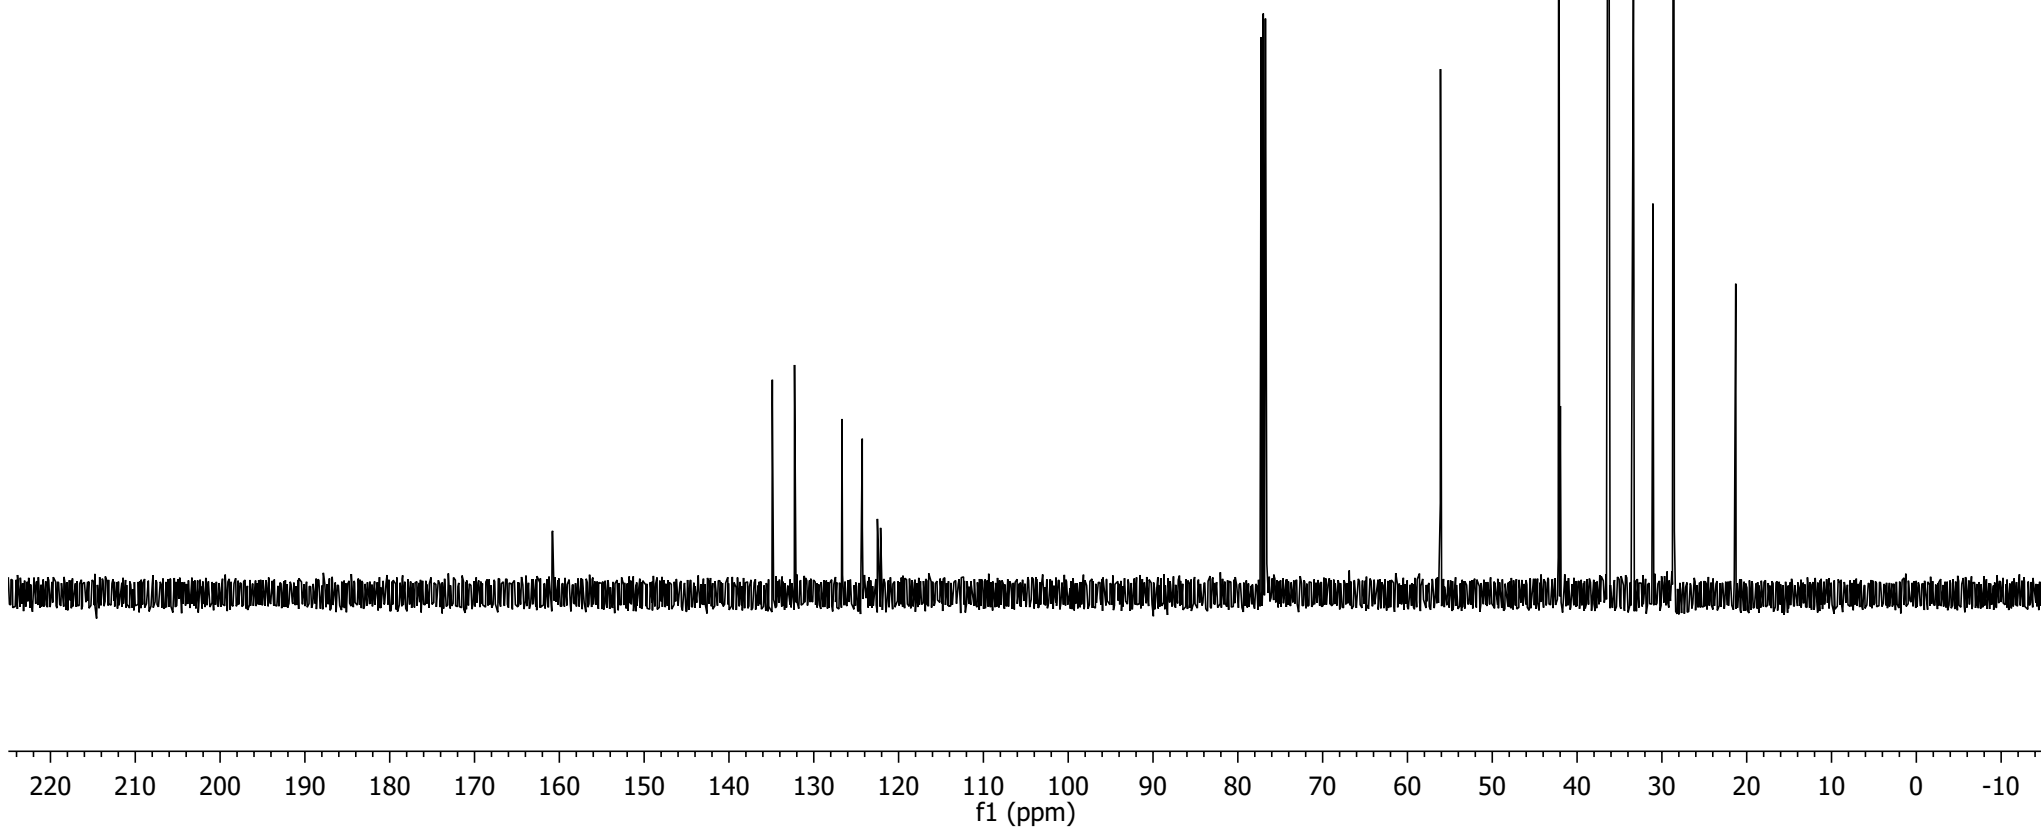



Title jkg-IV-81-P31  
Solvent cdcl3  
Spectrometer Frequency 161.90

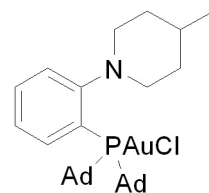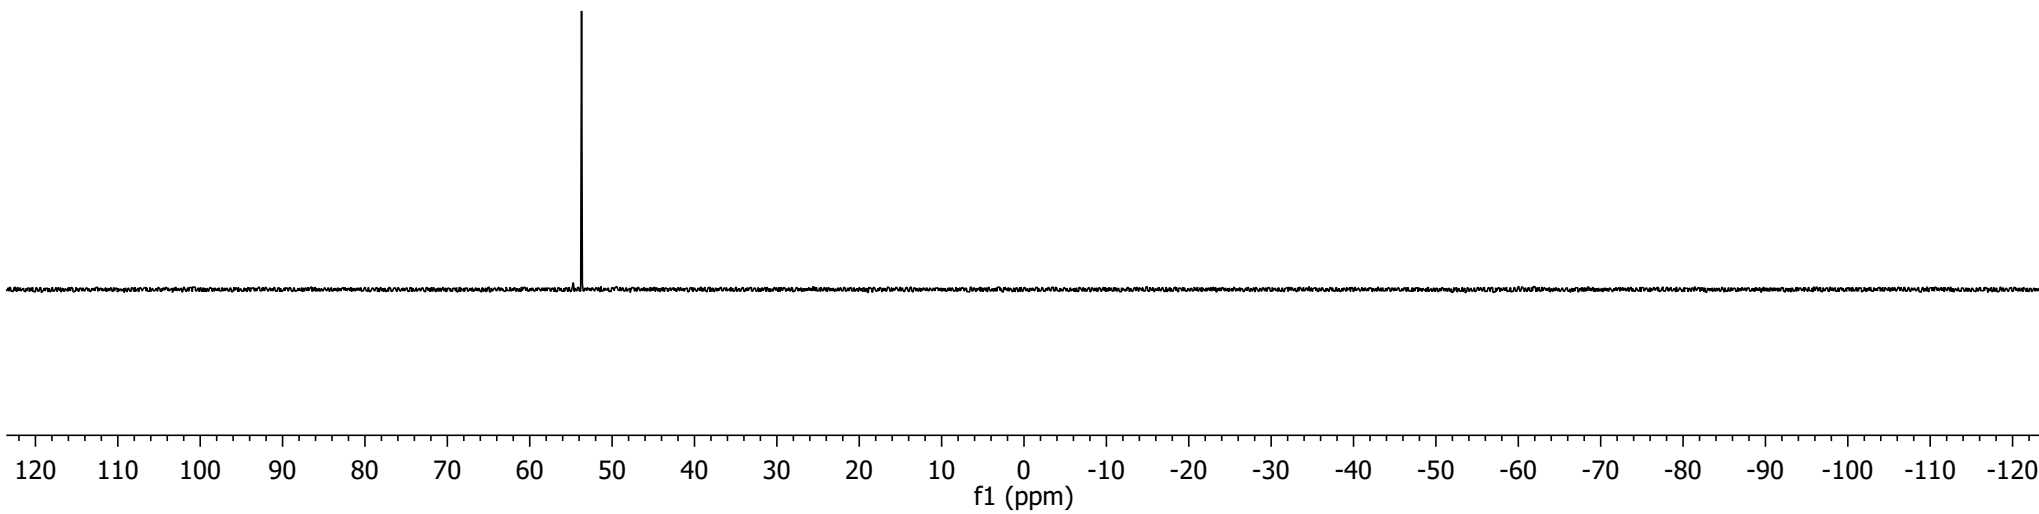

Title jkg-V-64B-ligand-H  
Solvent CDCl3  
Spectrometer Frequency 499.86

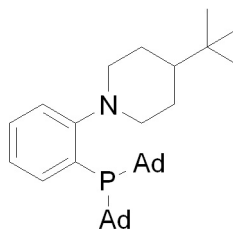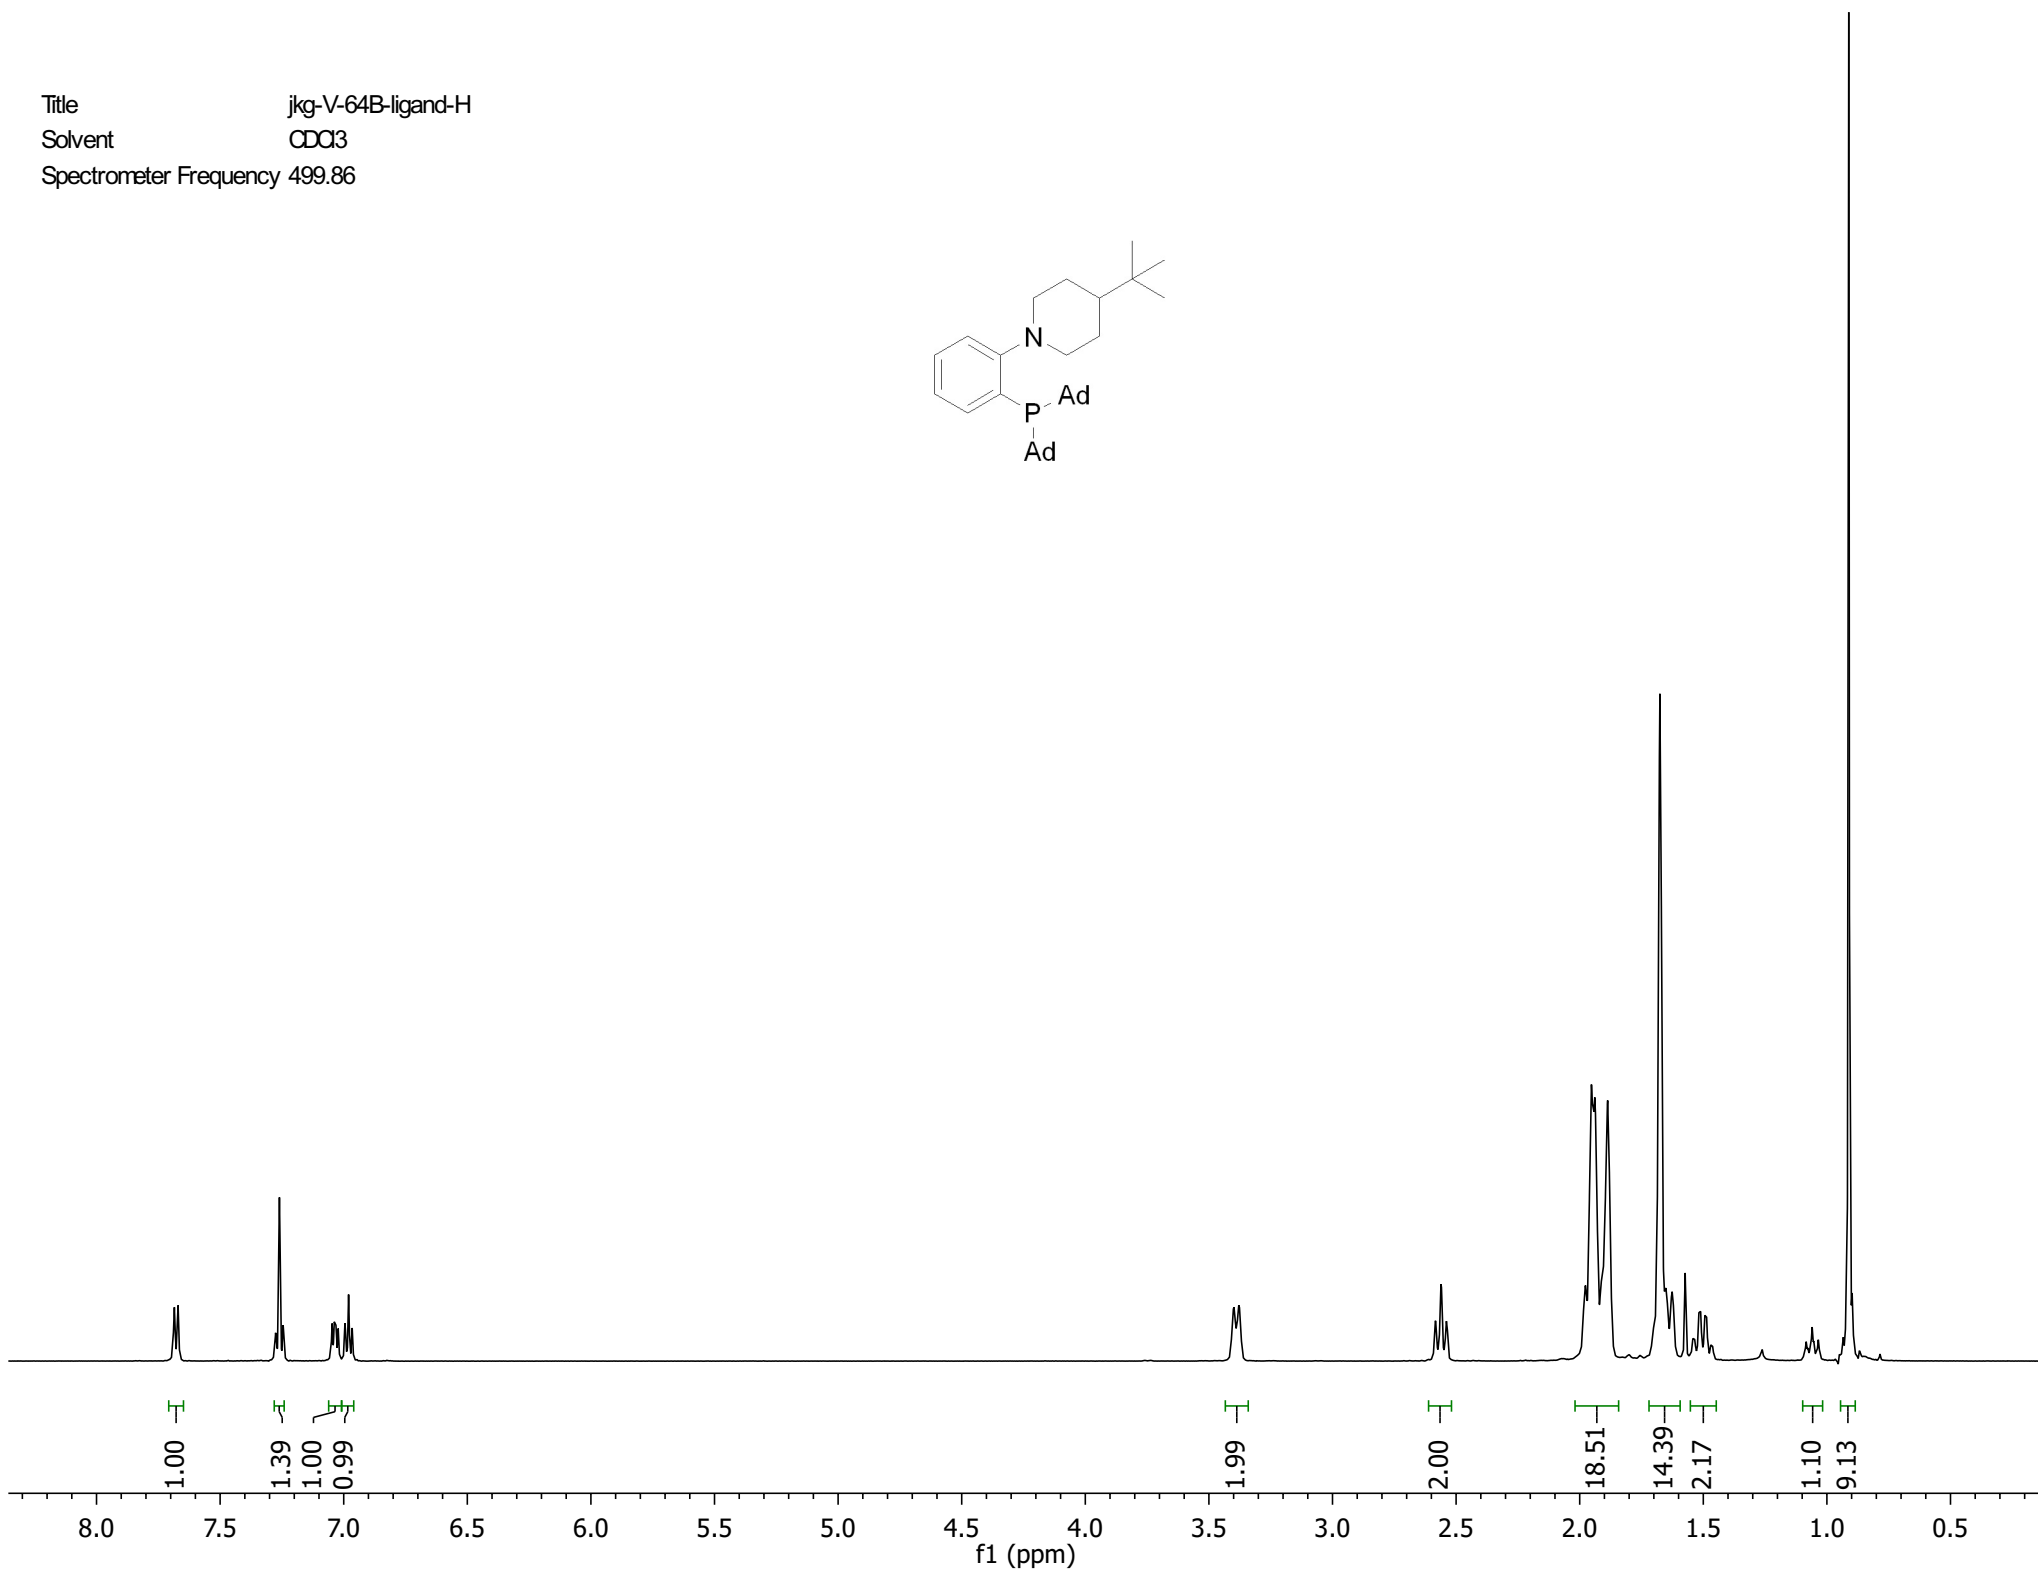

Title jkg-V-64B-ligand-C  
Solvent CDCl3  
Spectrometer Frequency 125.70

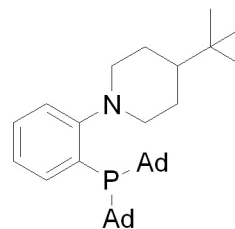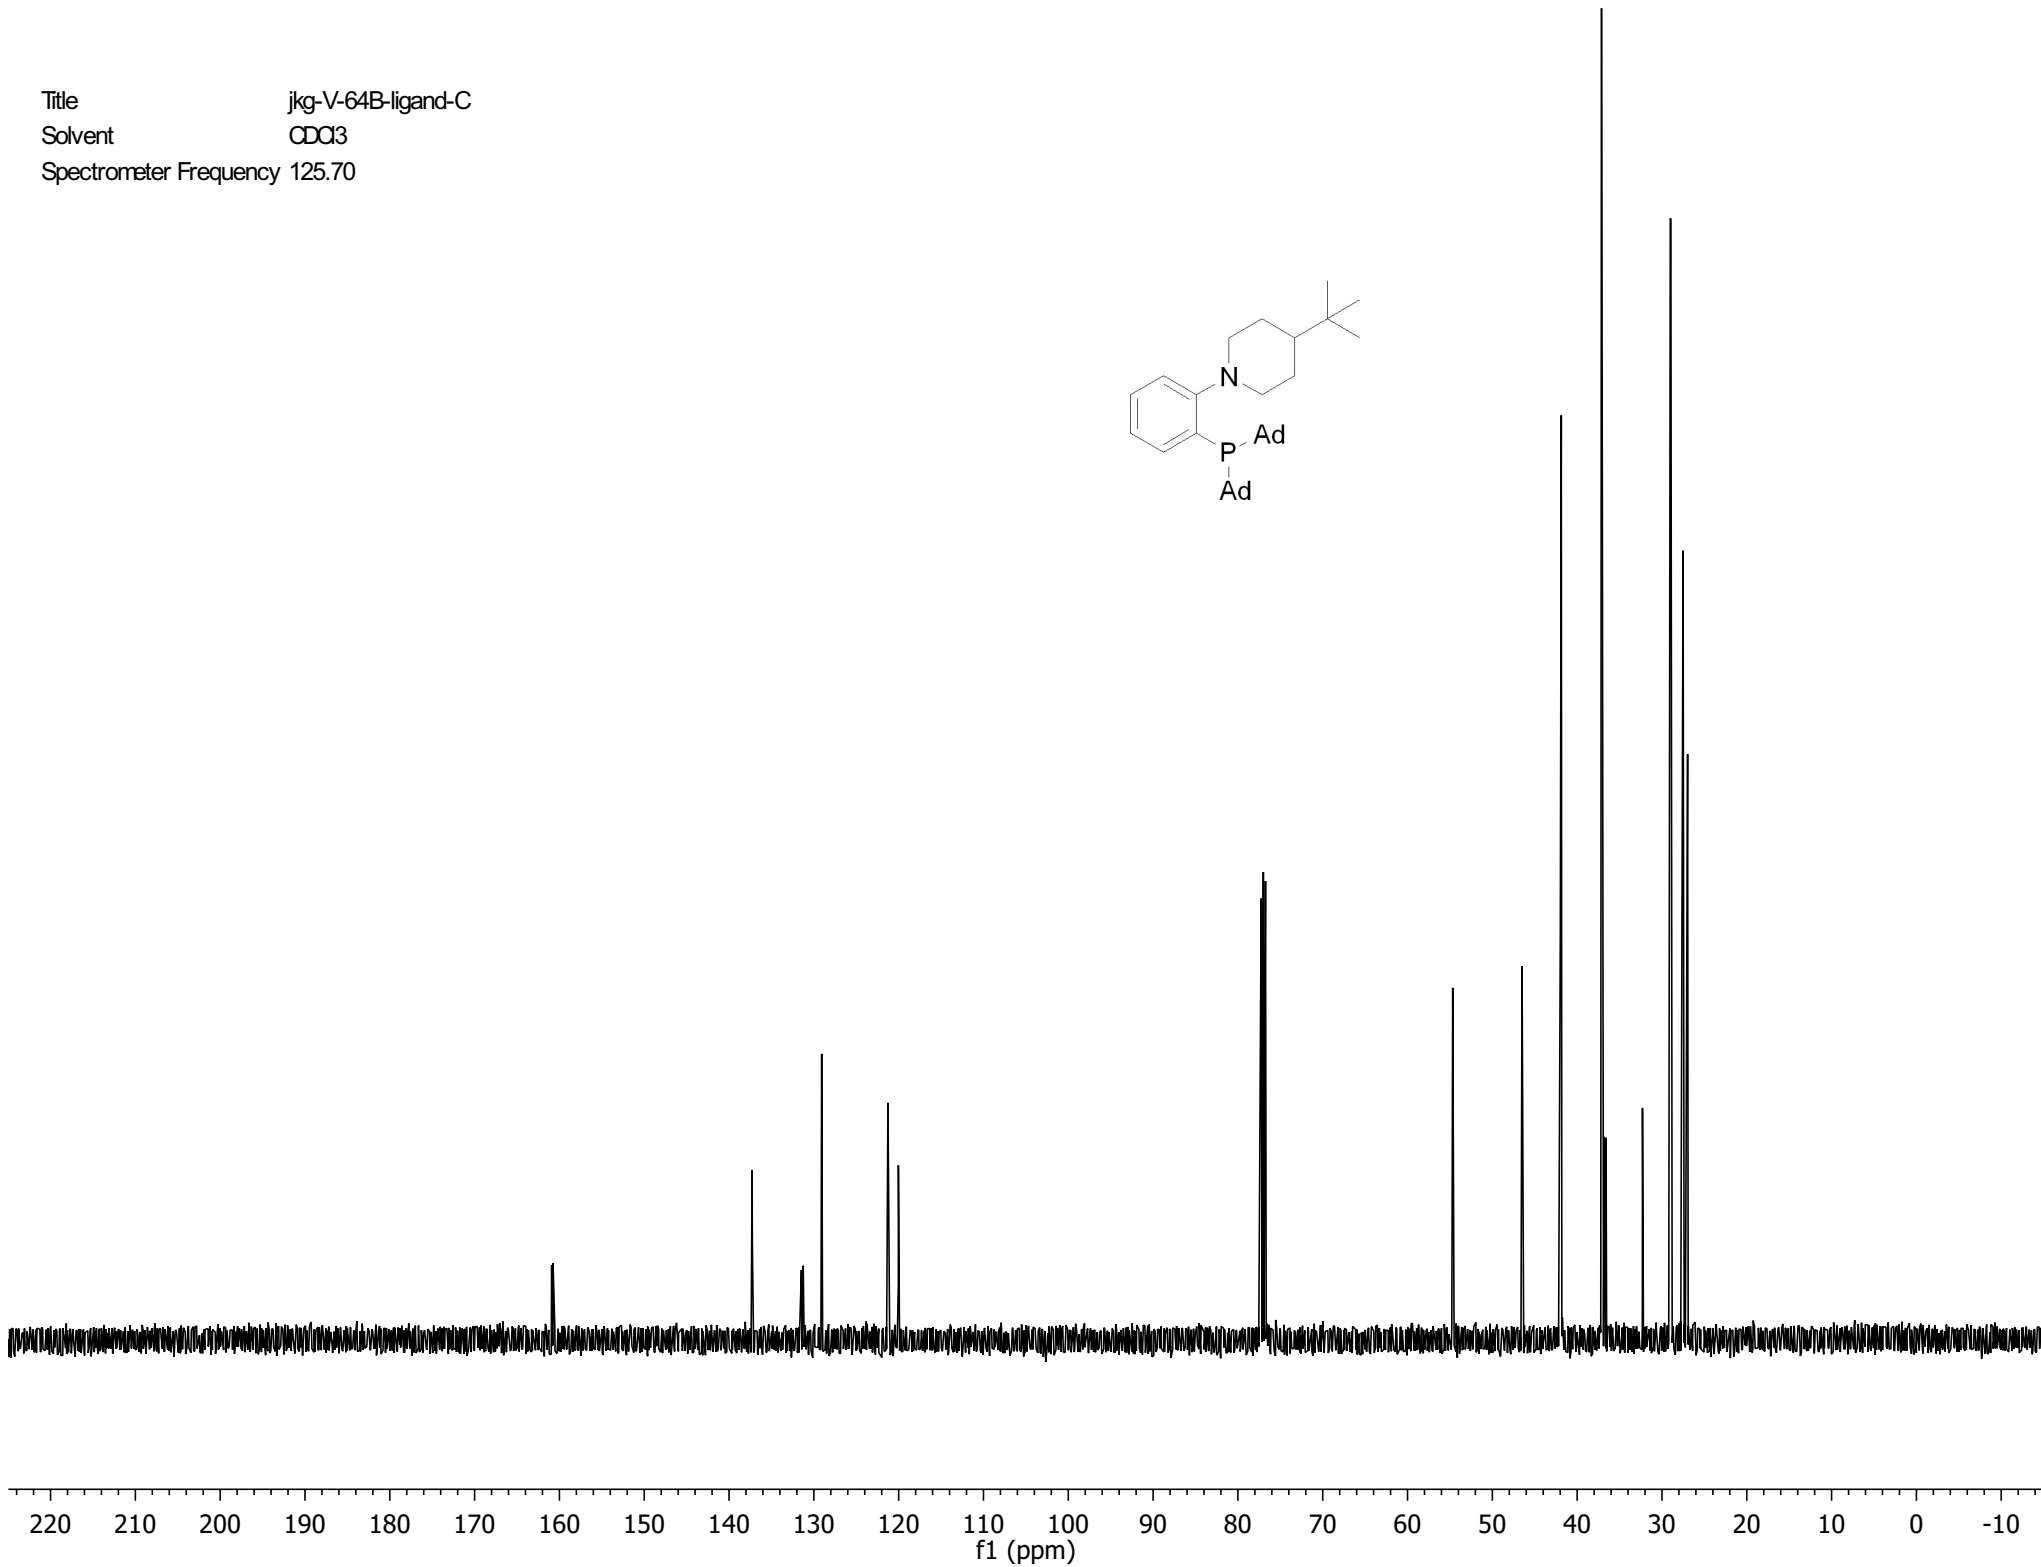

Title jkg-V-64B-ligand-P31  
Solvent cdcl3  
Spectrometer Frequency 161.90

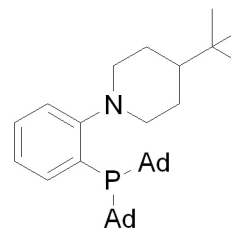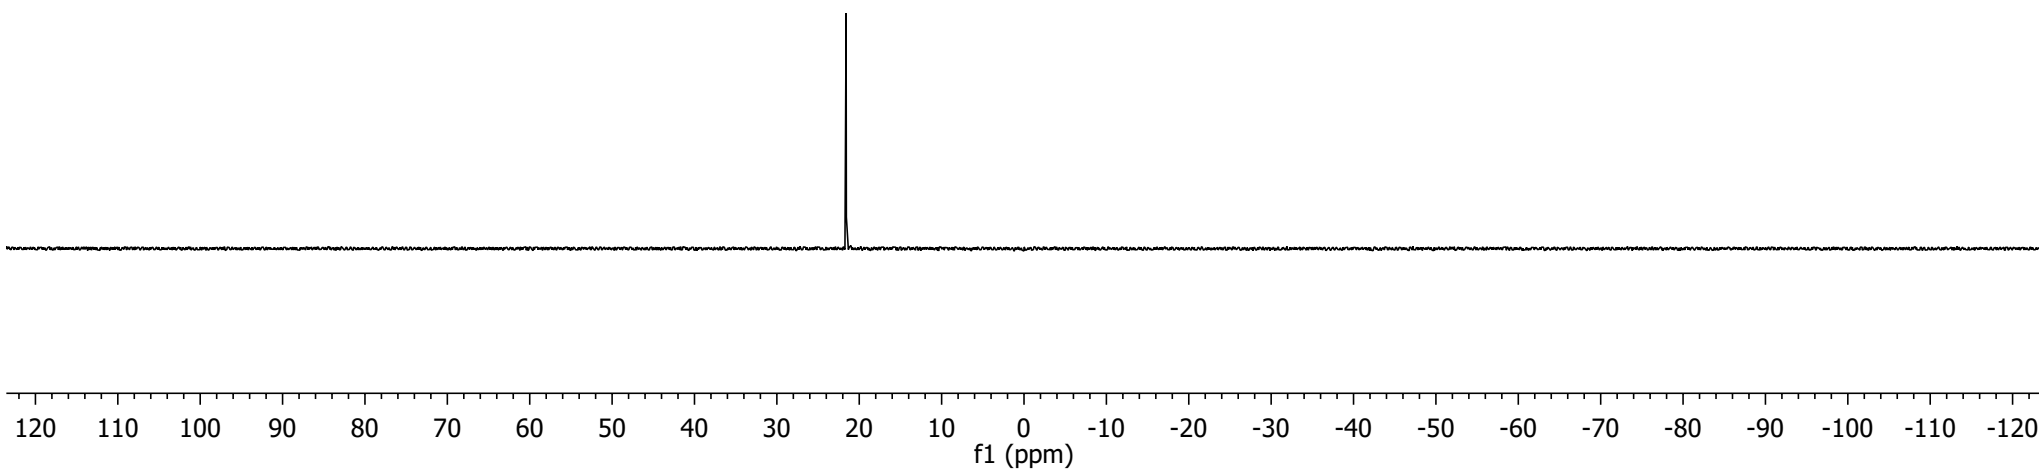

Title jkg-V-5A-LAuCl-H  
Solvent CDCl3  
Spectrometer Frequency 499.86

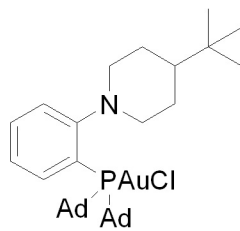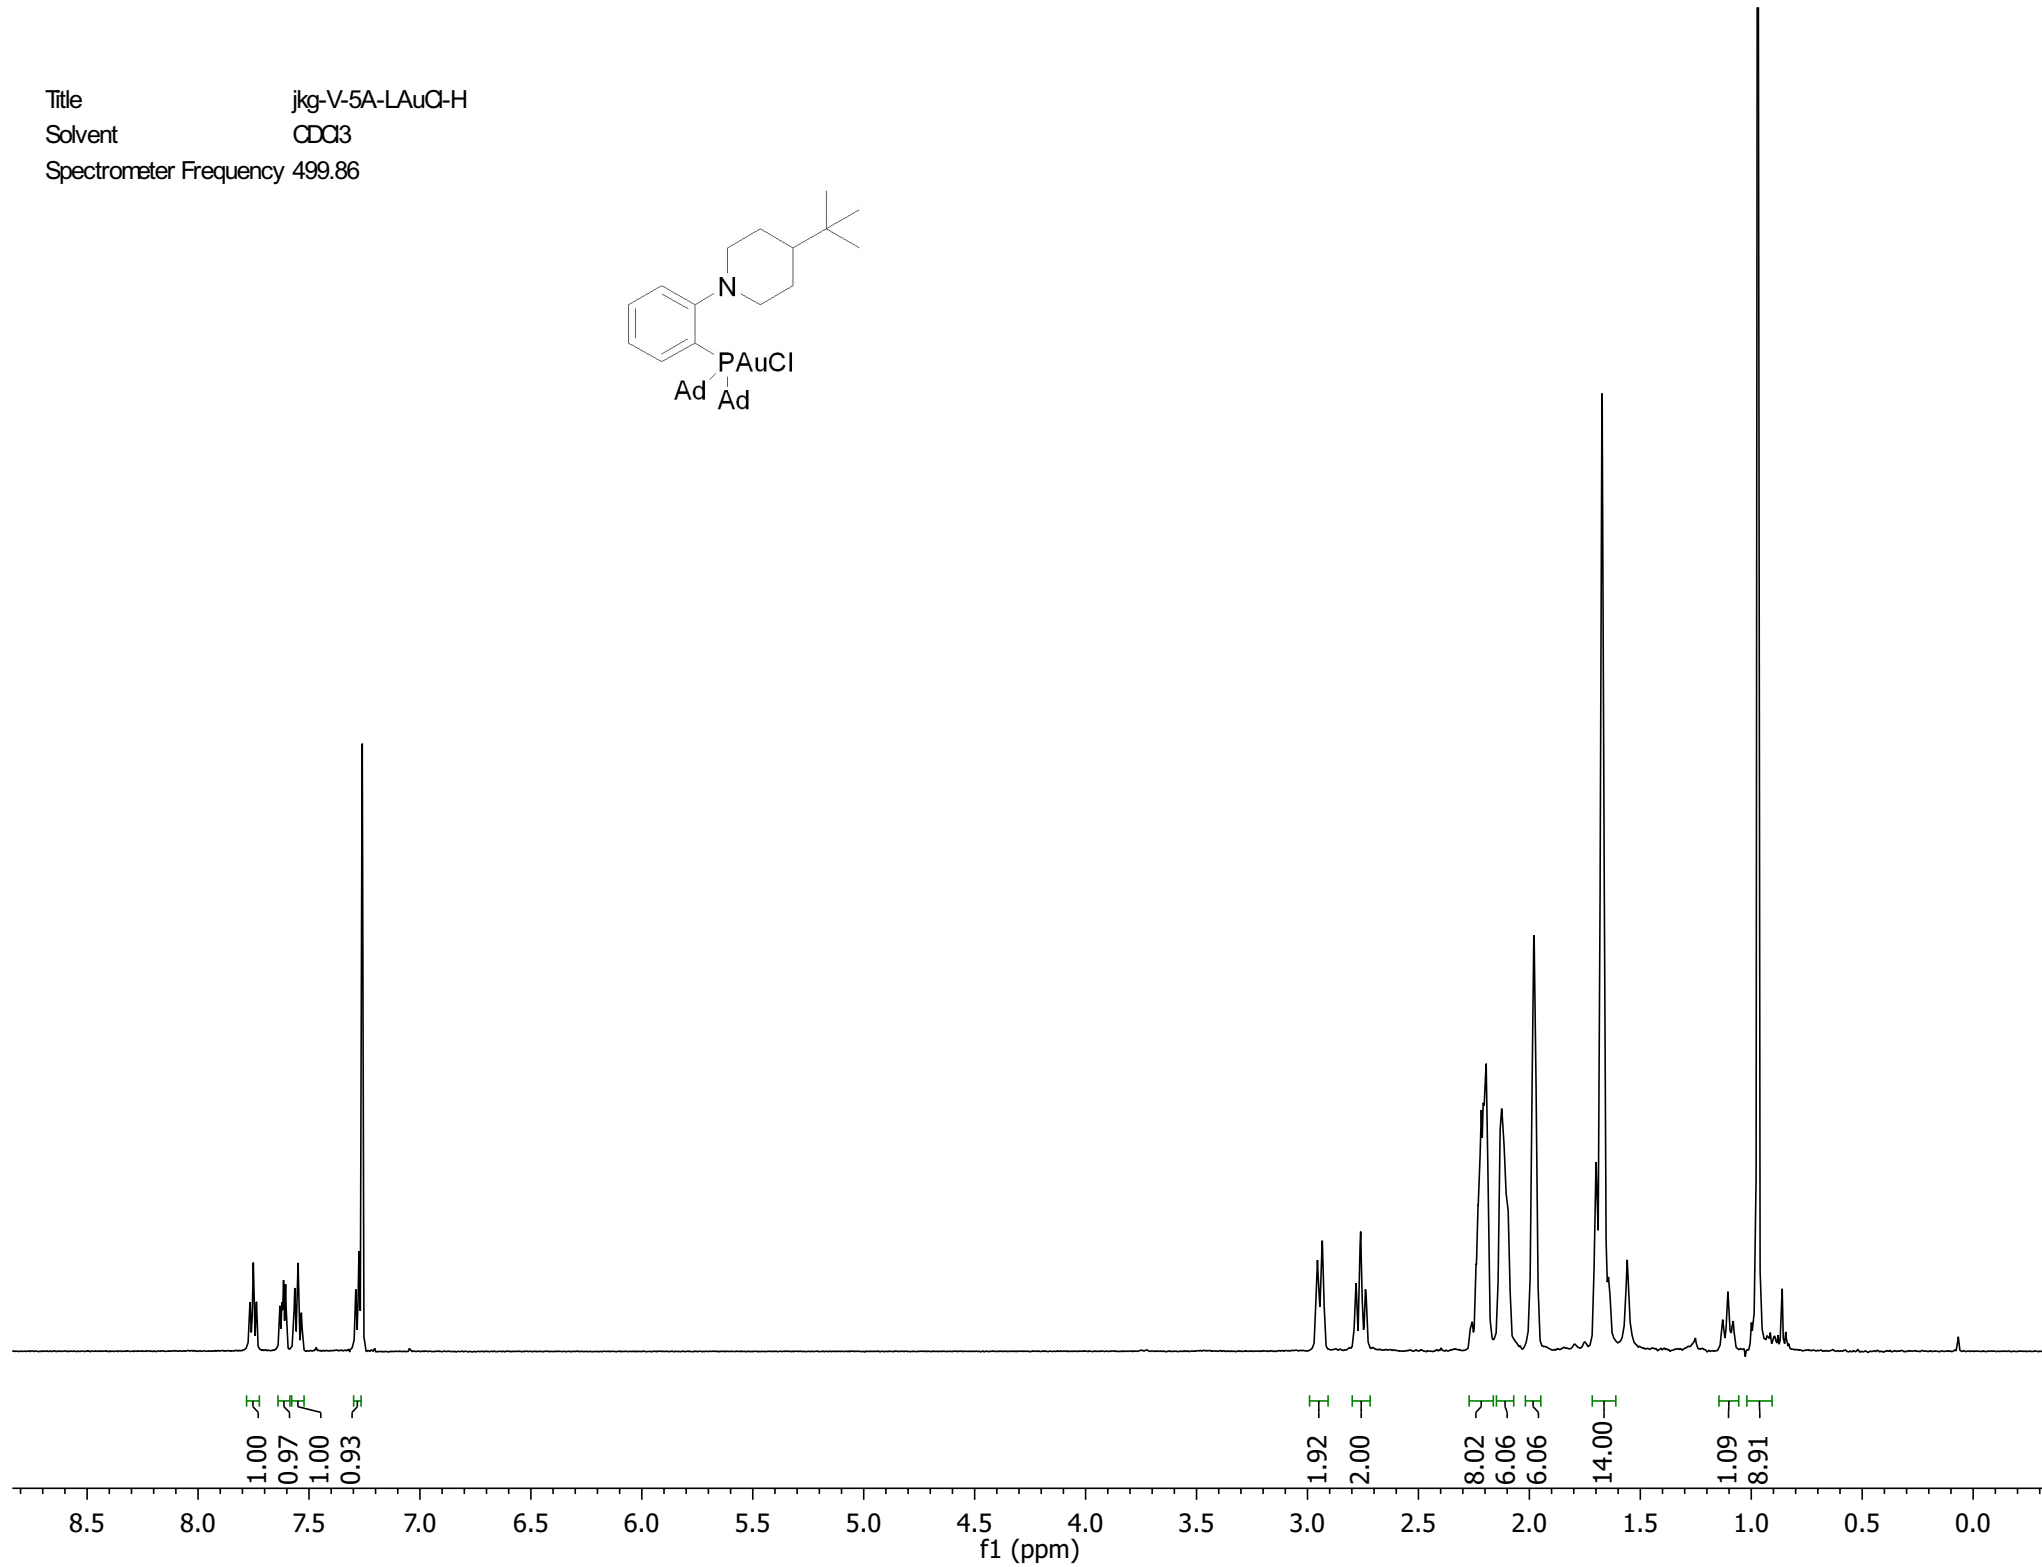

Title jkg-V-5A-LAuCl-C  
Solvent CDCl3  
Spectrometer Frequency 125.70

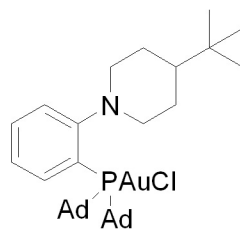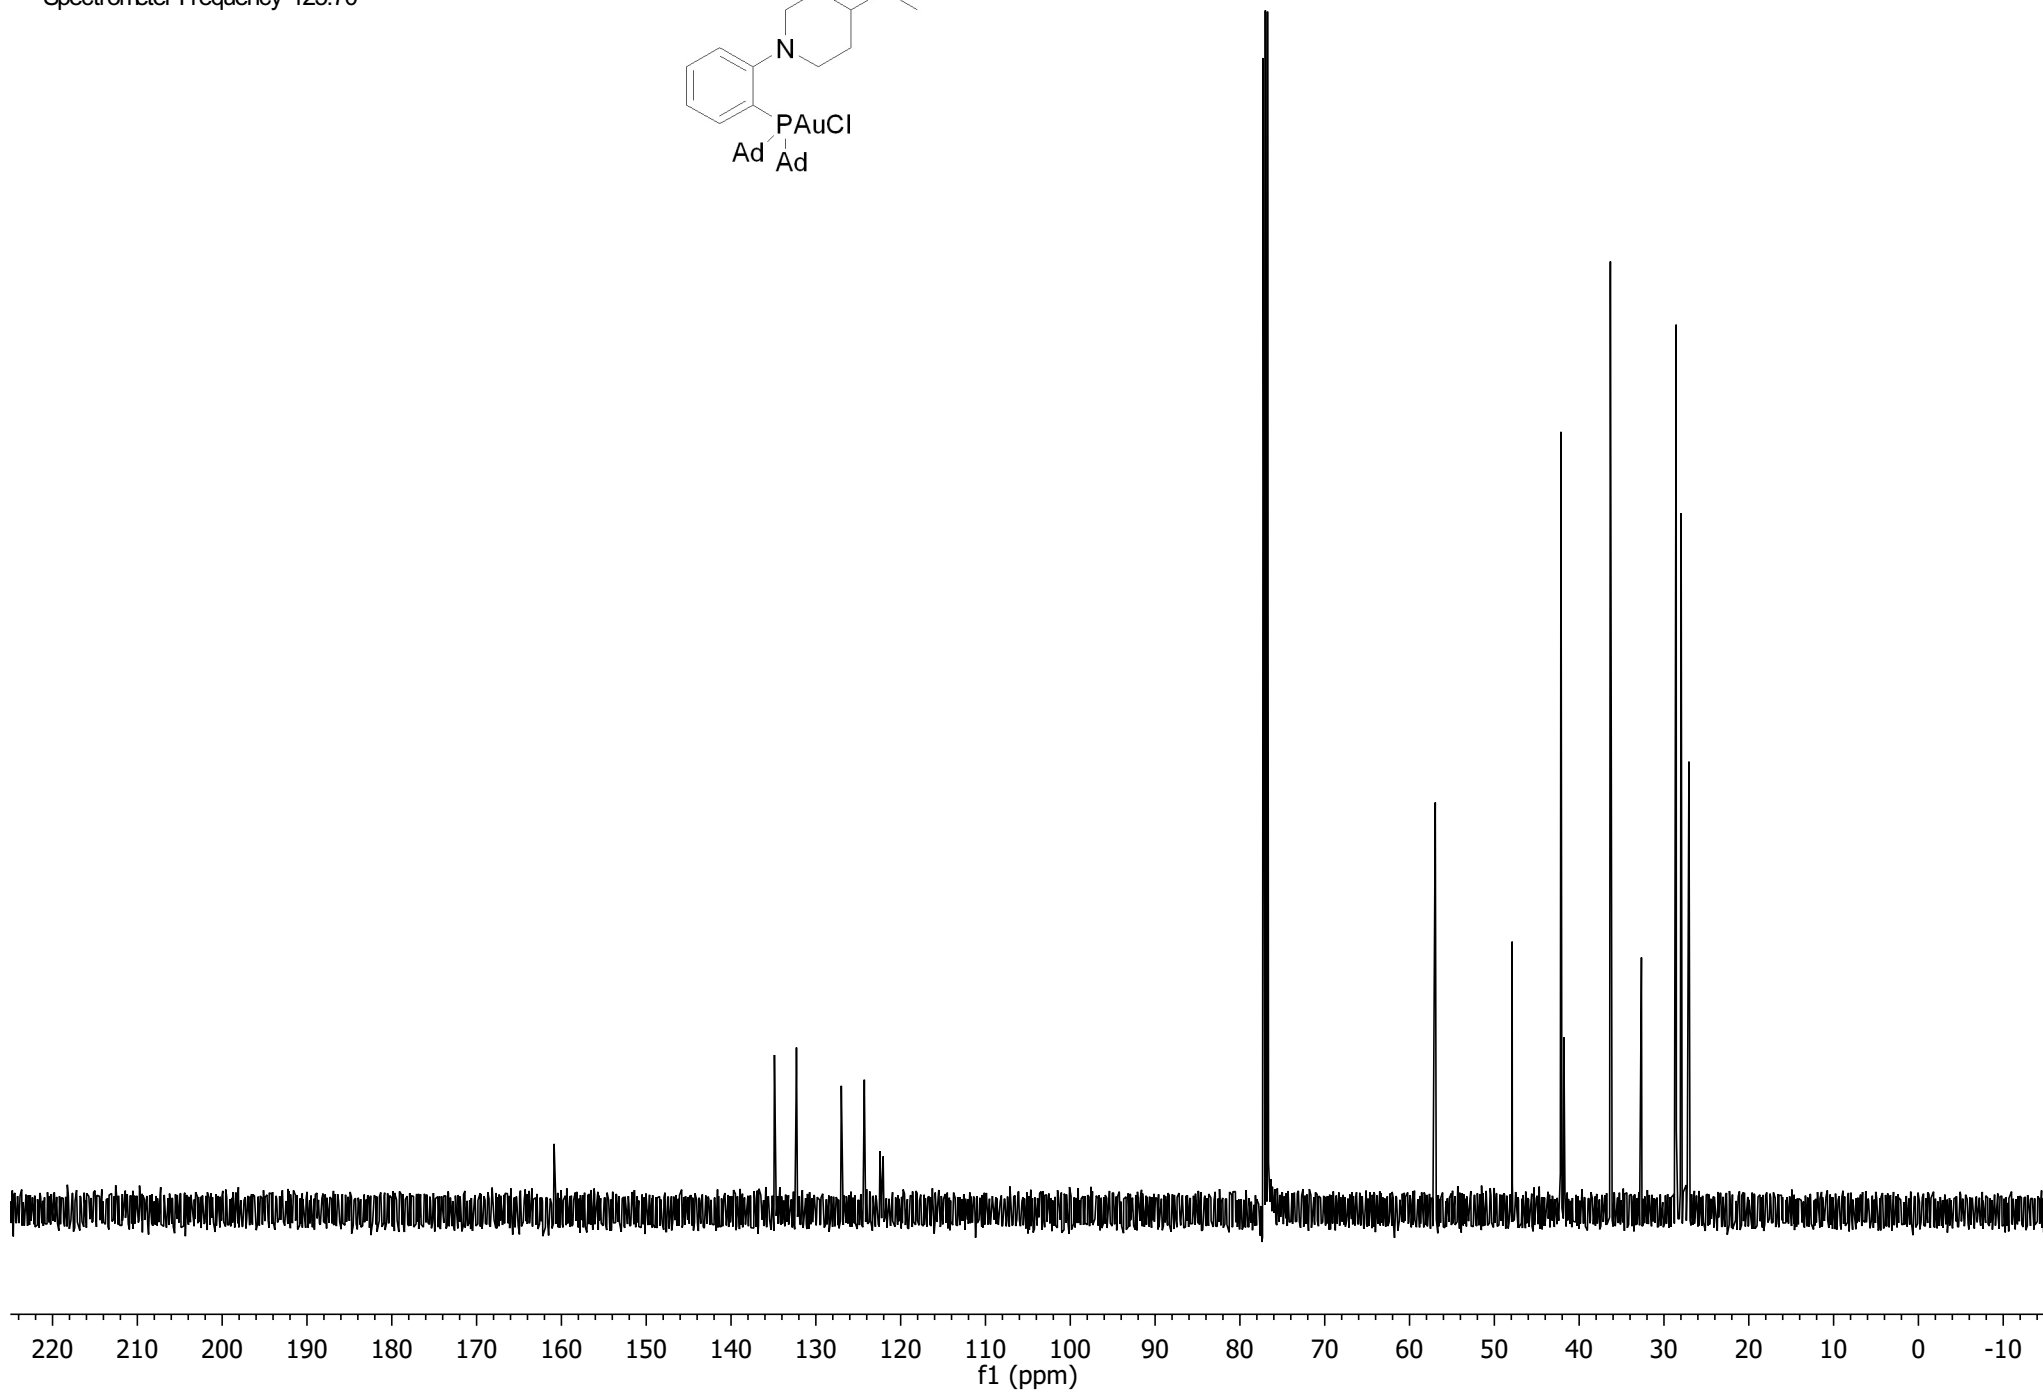

Title jkg-V-5A-P31-LAuCl  
Solvent cdcl3  
Spectrometer Frequency 161.90

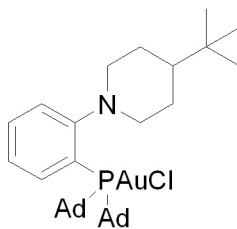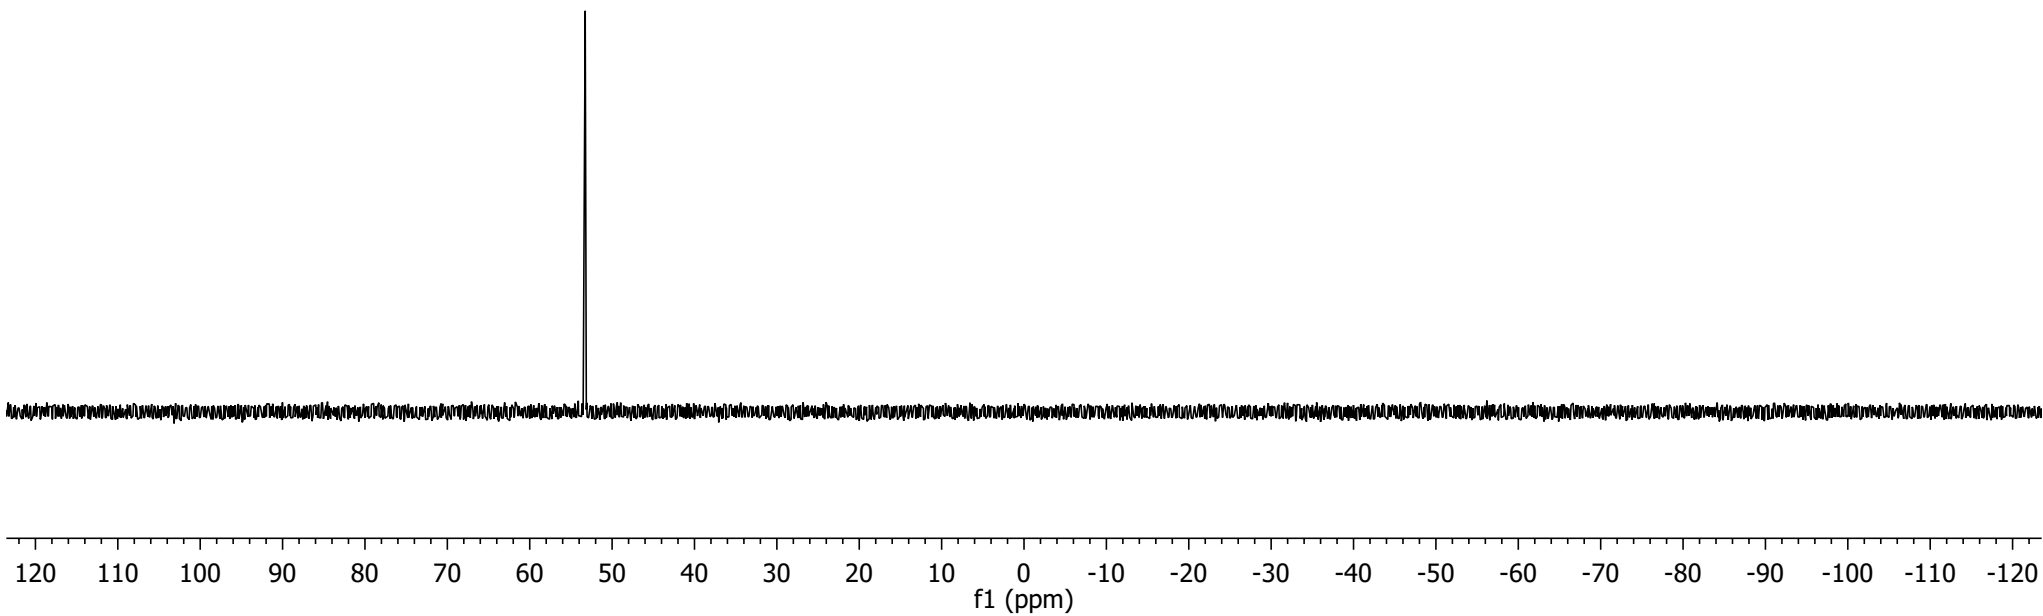

Title jkg-IV-138B-ligand-H  
Solvent CDCl3  
Spectrometer Frequency 499.86

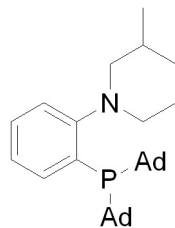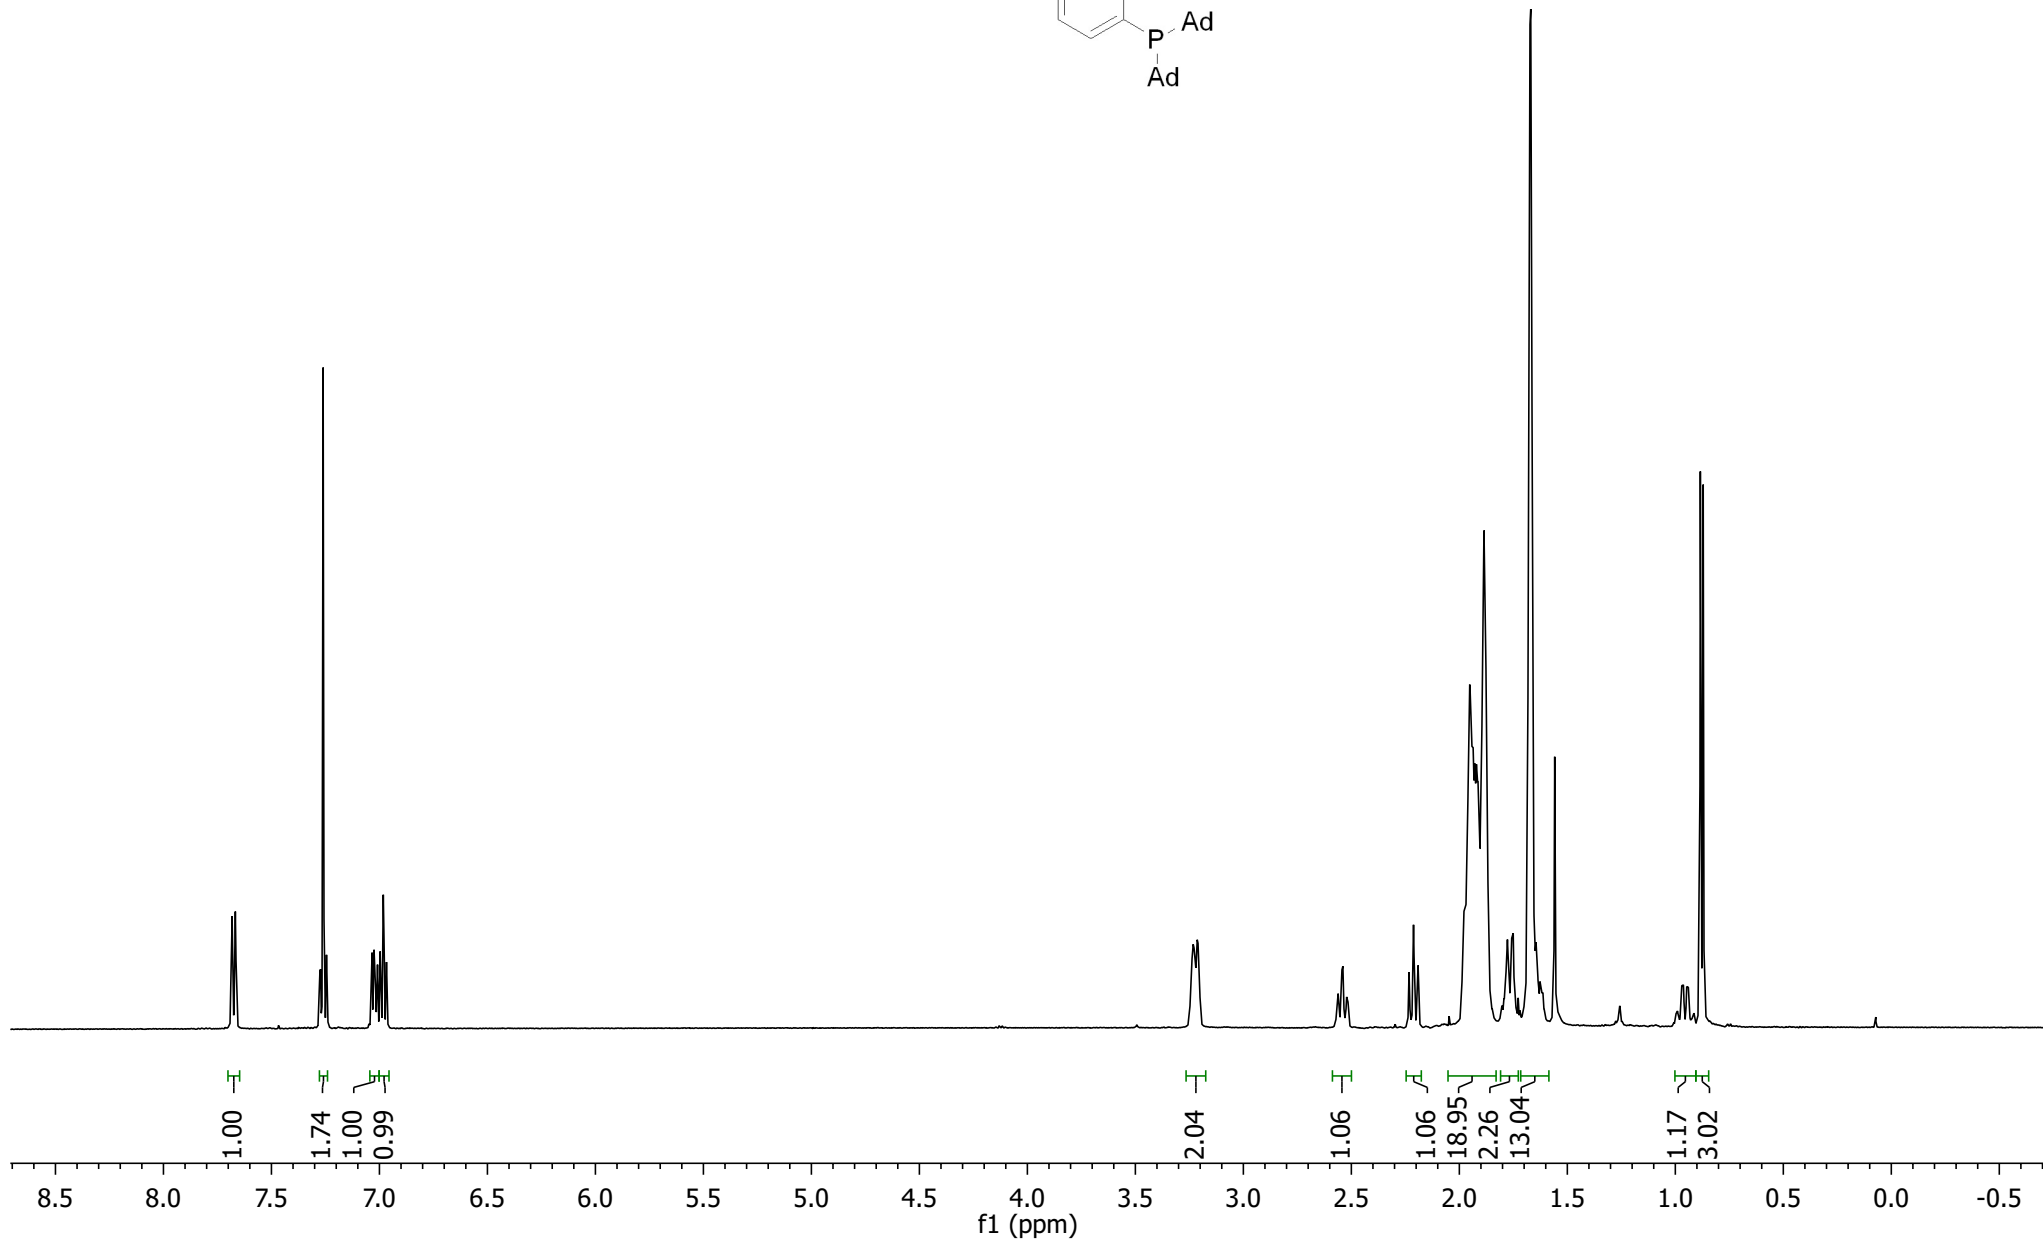



Title jkg-IV-138B-ligand-C  
Solvent CDCl3  
Spectrometer Frequency 125.70

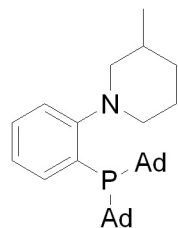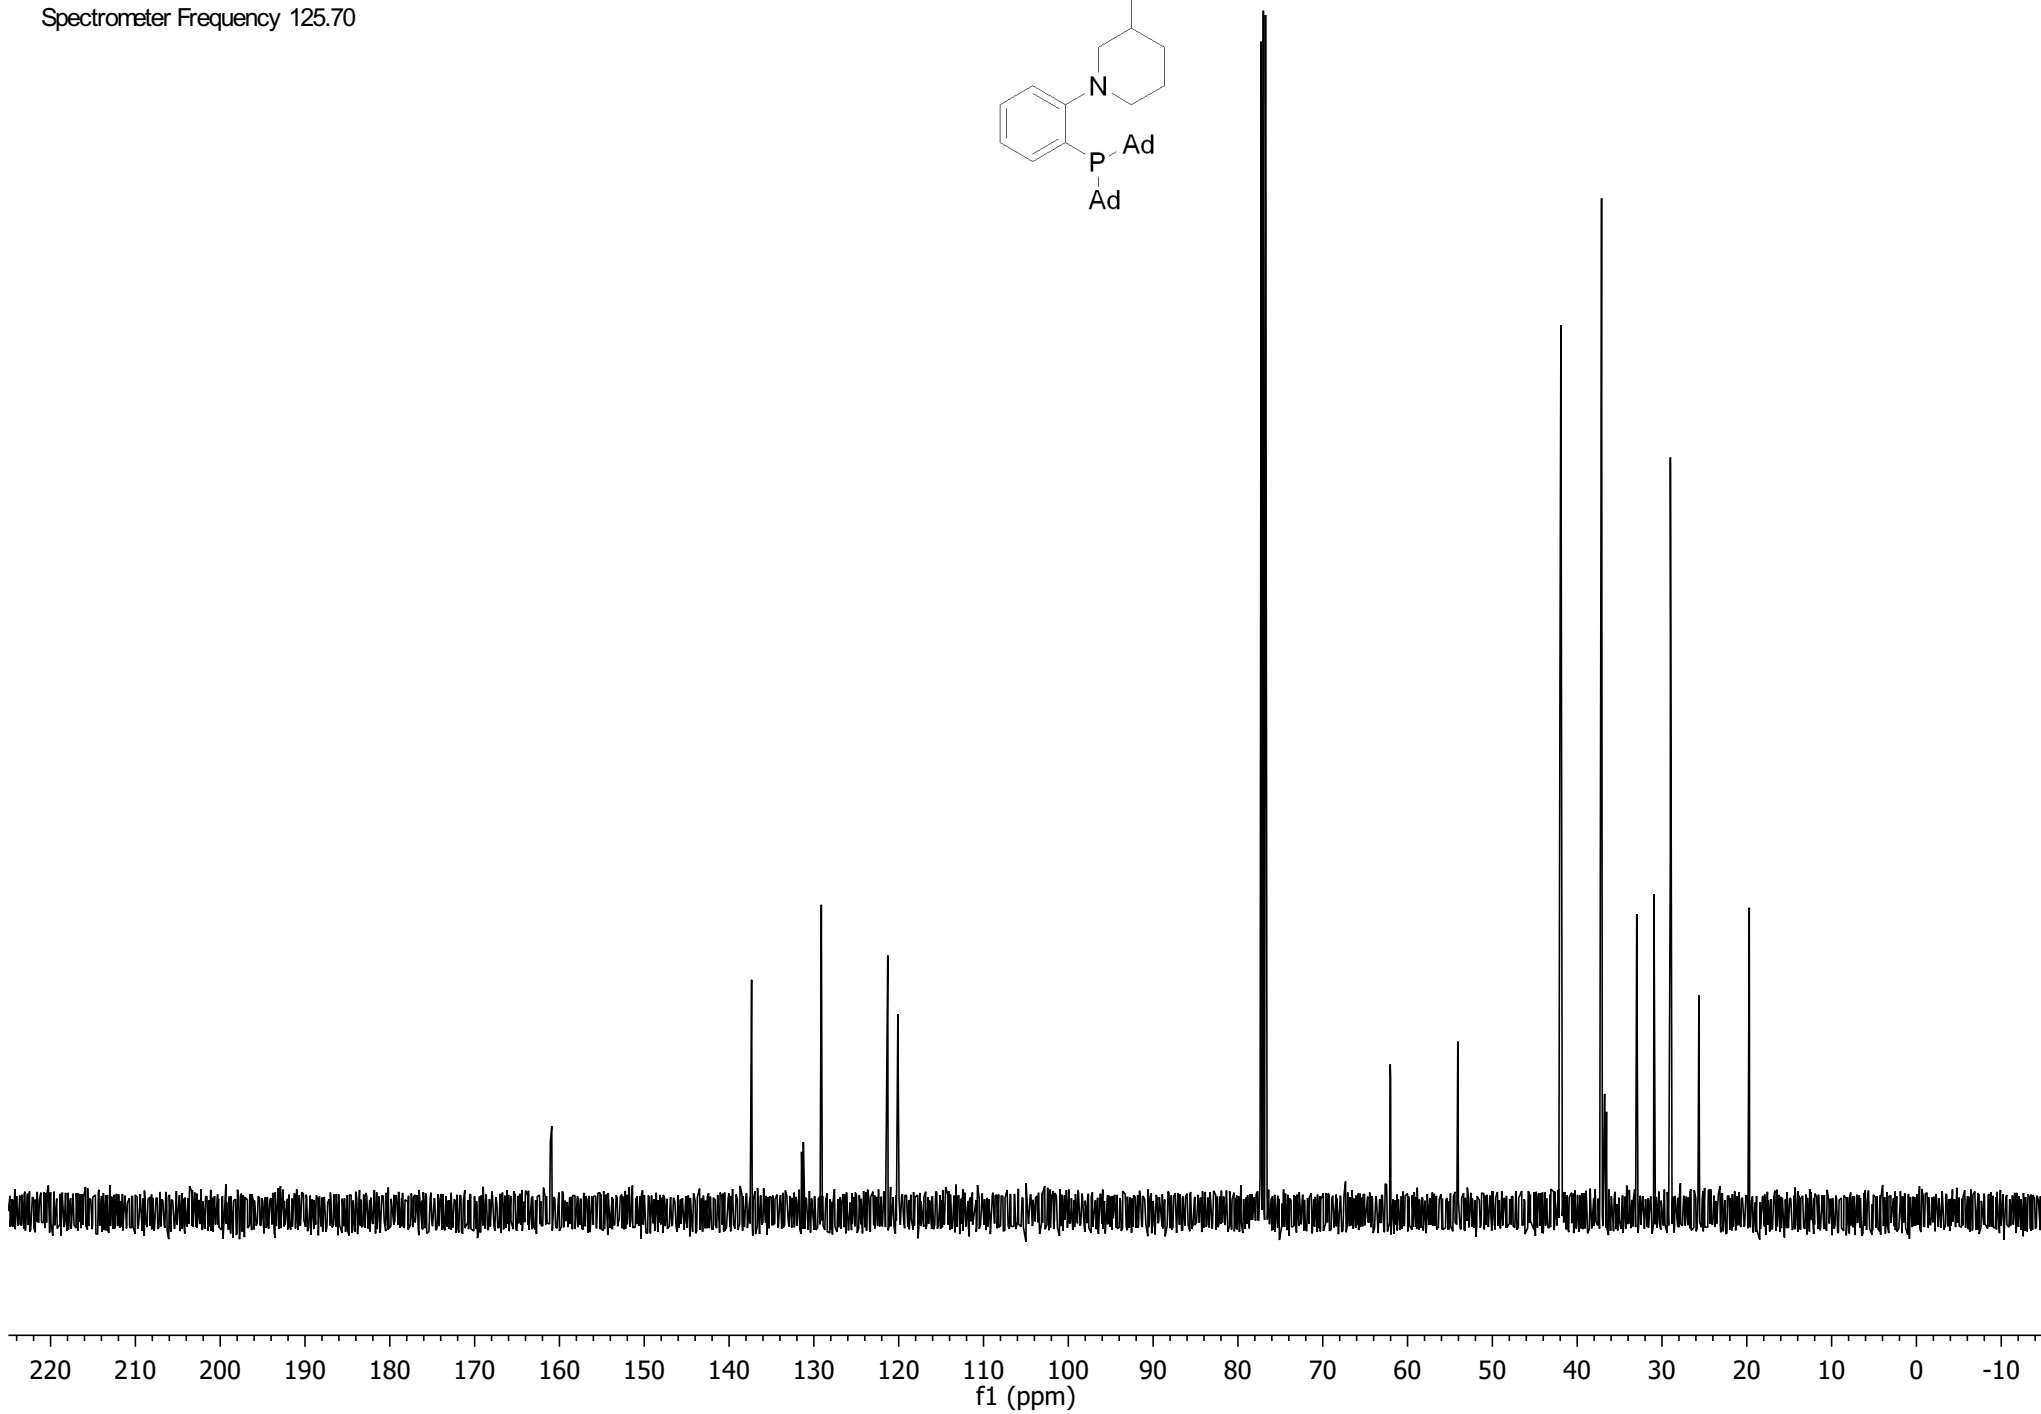

Title jkg-IV-138B-Ligand-P31  
Solvent cdcl3  
Spectrometer Frequency 161.90

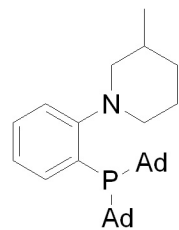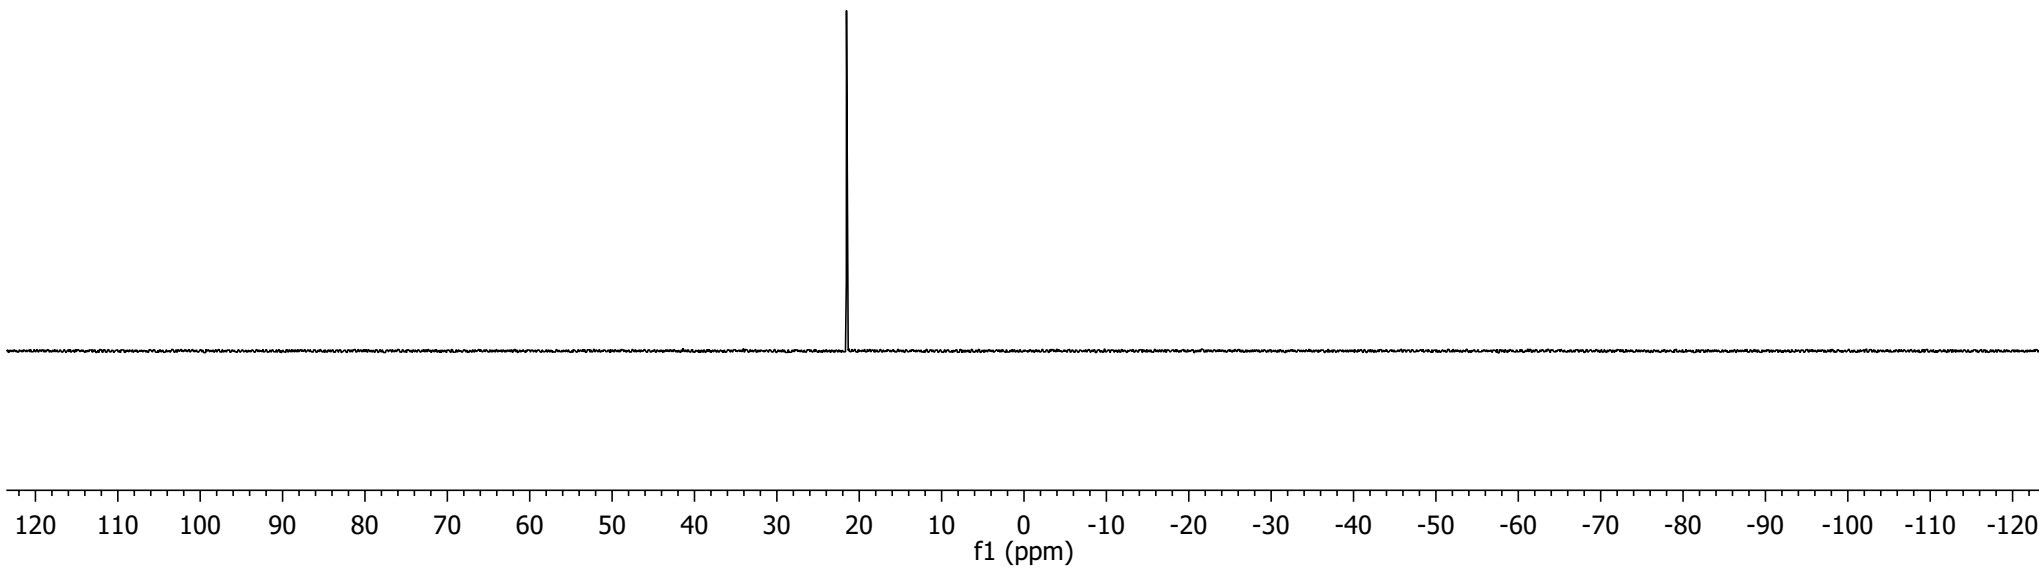

Title jkg-IV-140A-LAuCl-H  
Solvent CDCl3  
Spectrometer Frequency 499.86

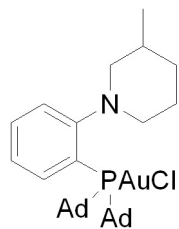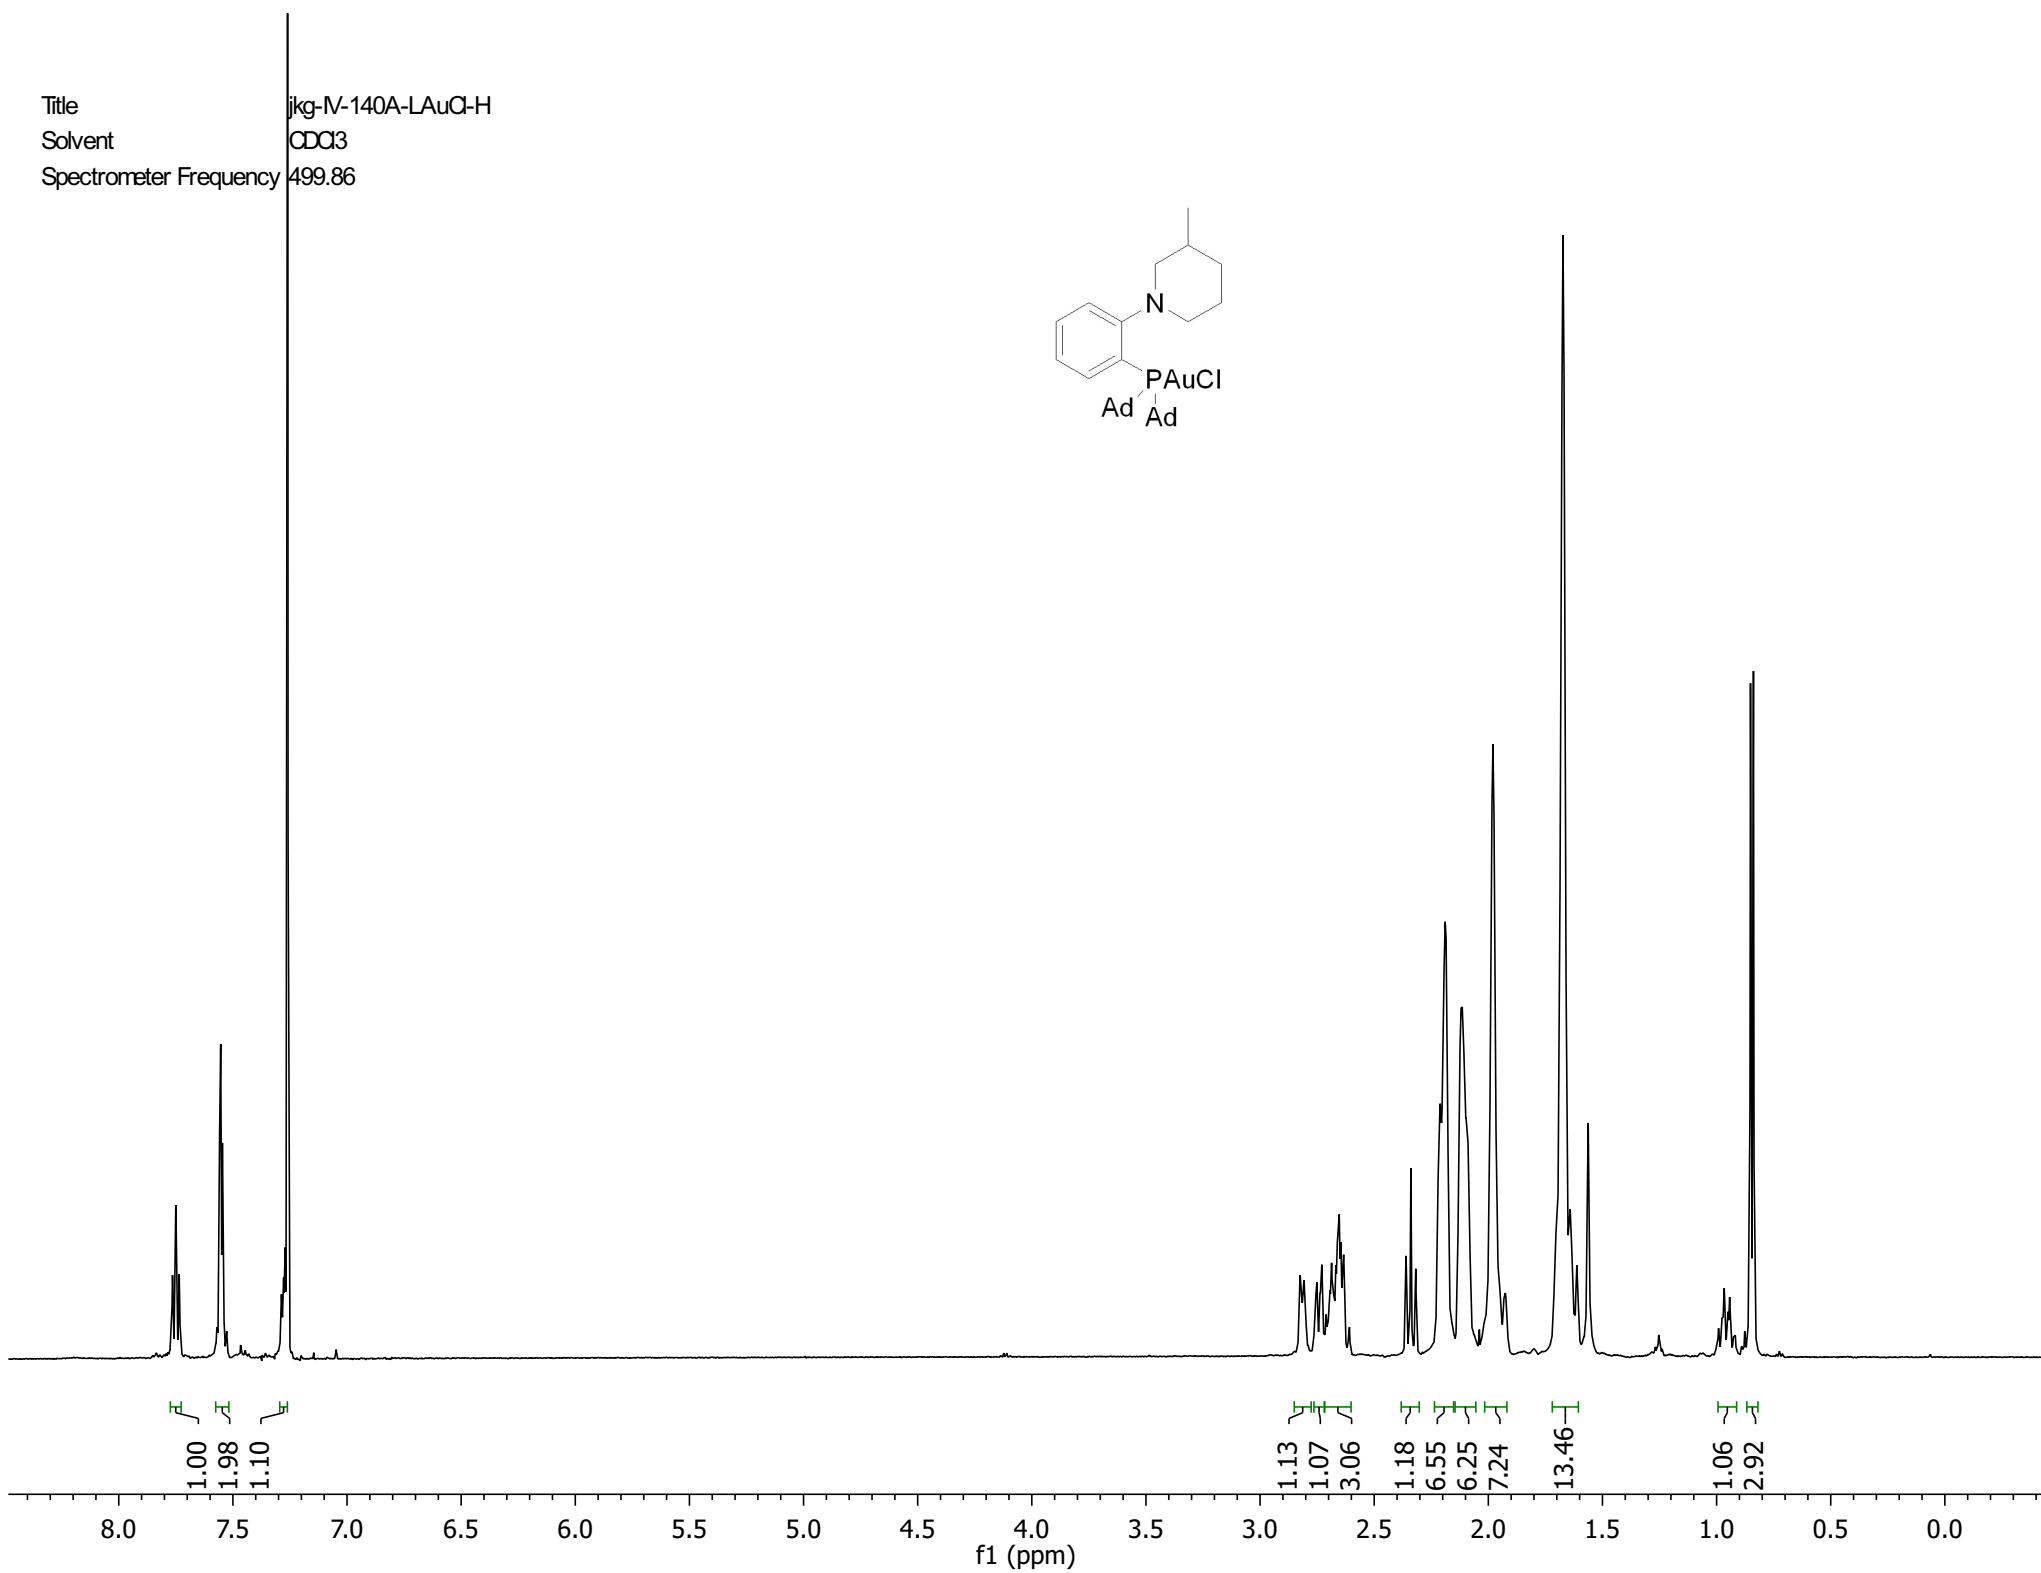



Title jkg-IV-140B-LAuCl-P31  
Solvent cdcl3  
Spectrometer Frequency 161.90

53.69

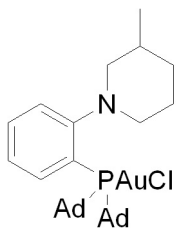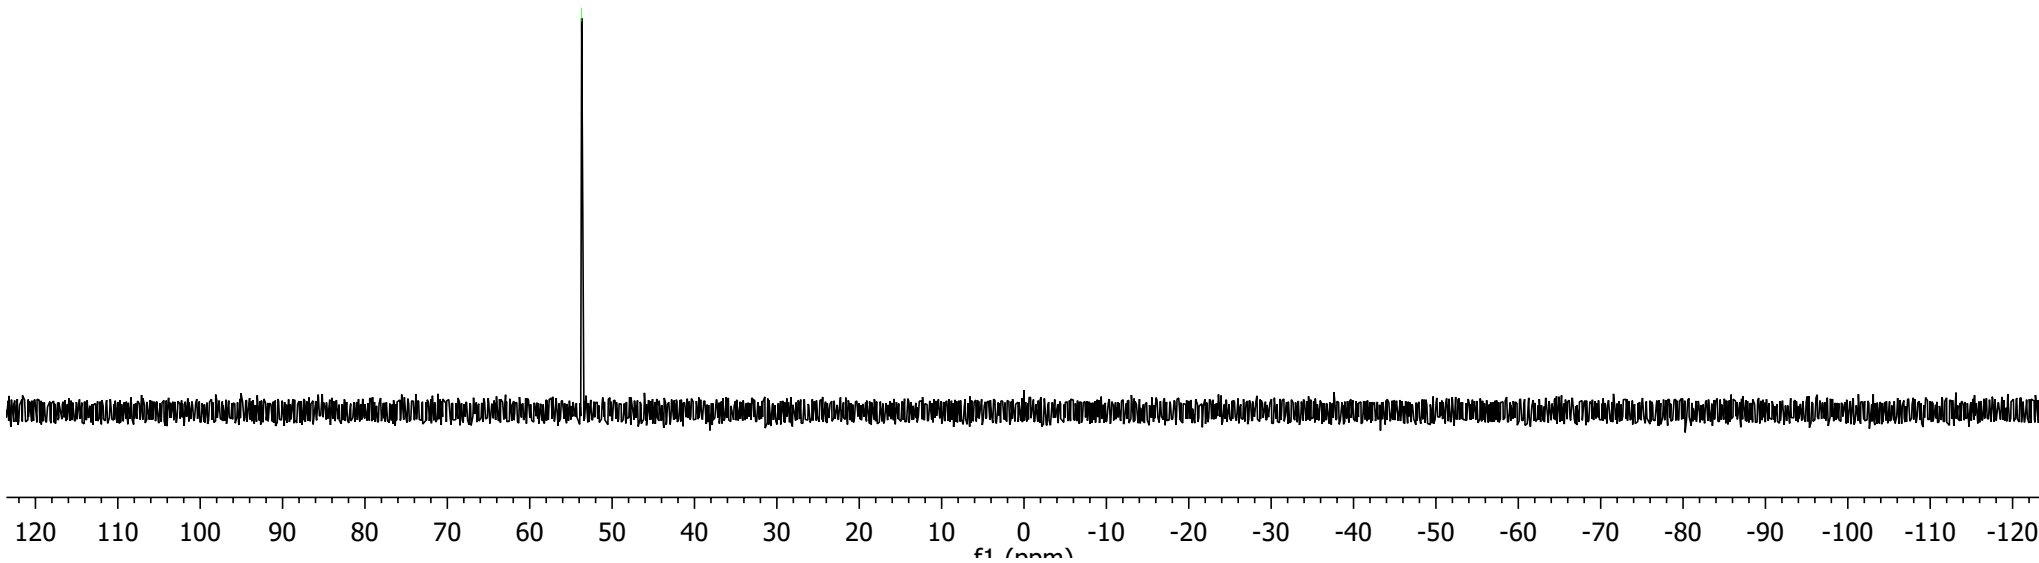

Title jkg-V-21B-Ligand-H  
Solvent CDCl<sub>3</sub>  
Spectrometer Frequency 499.86

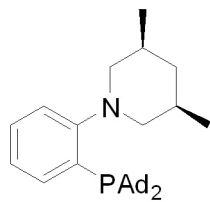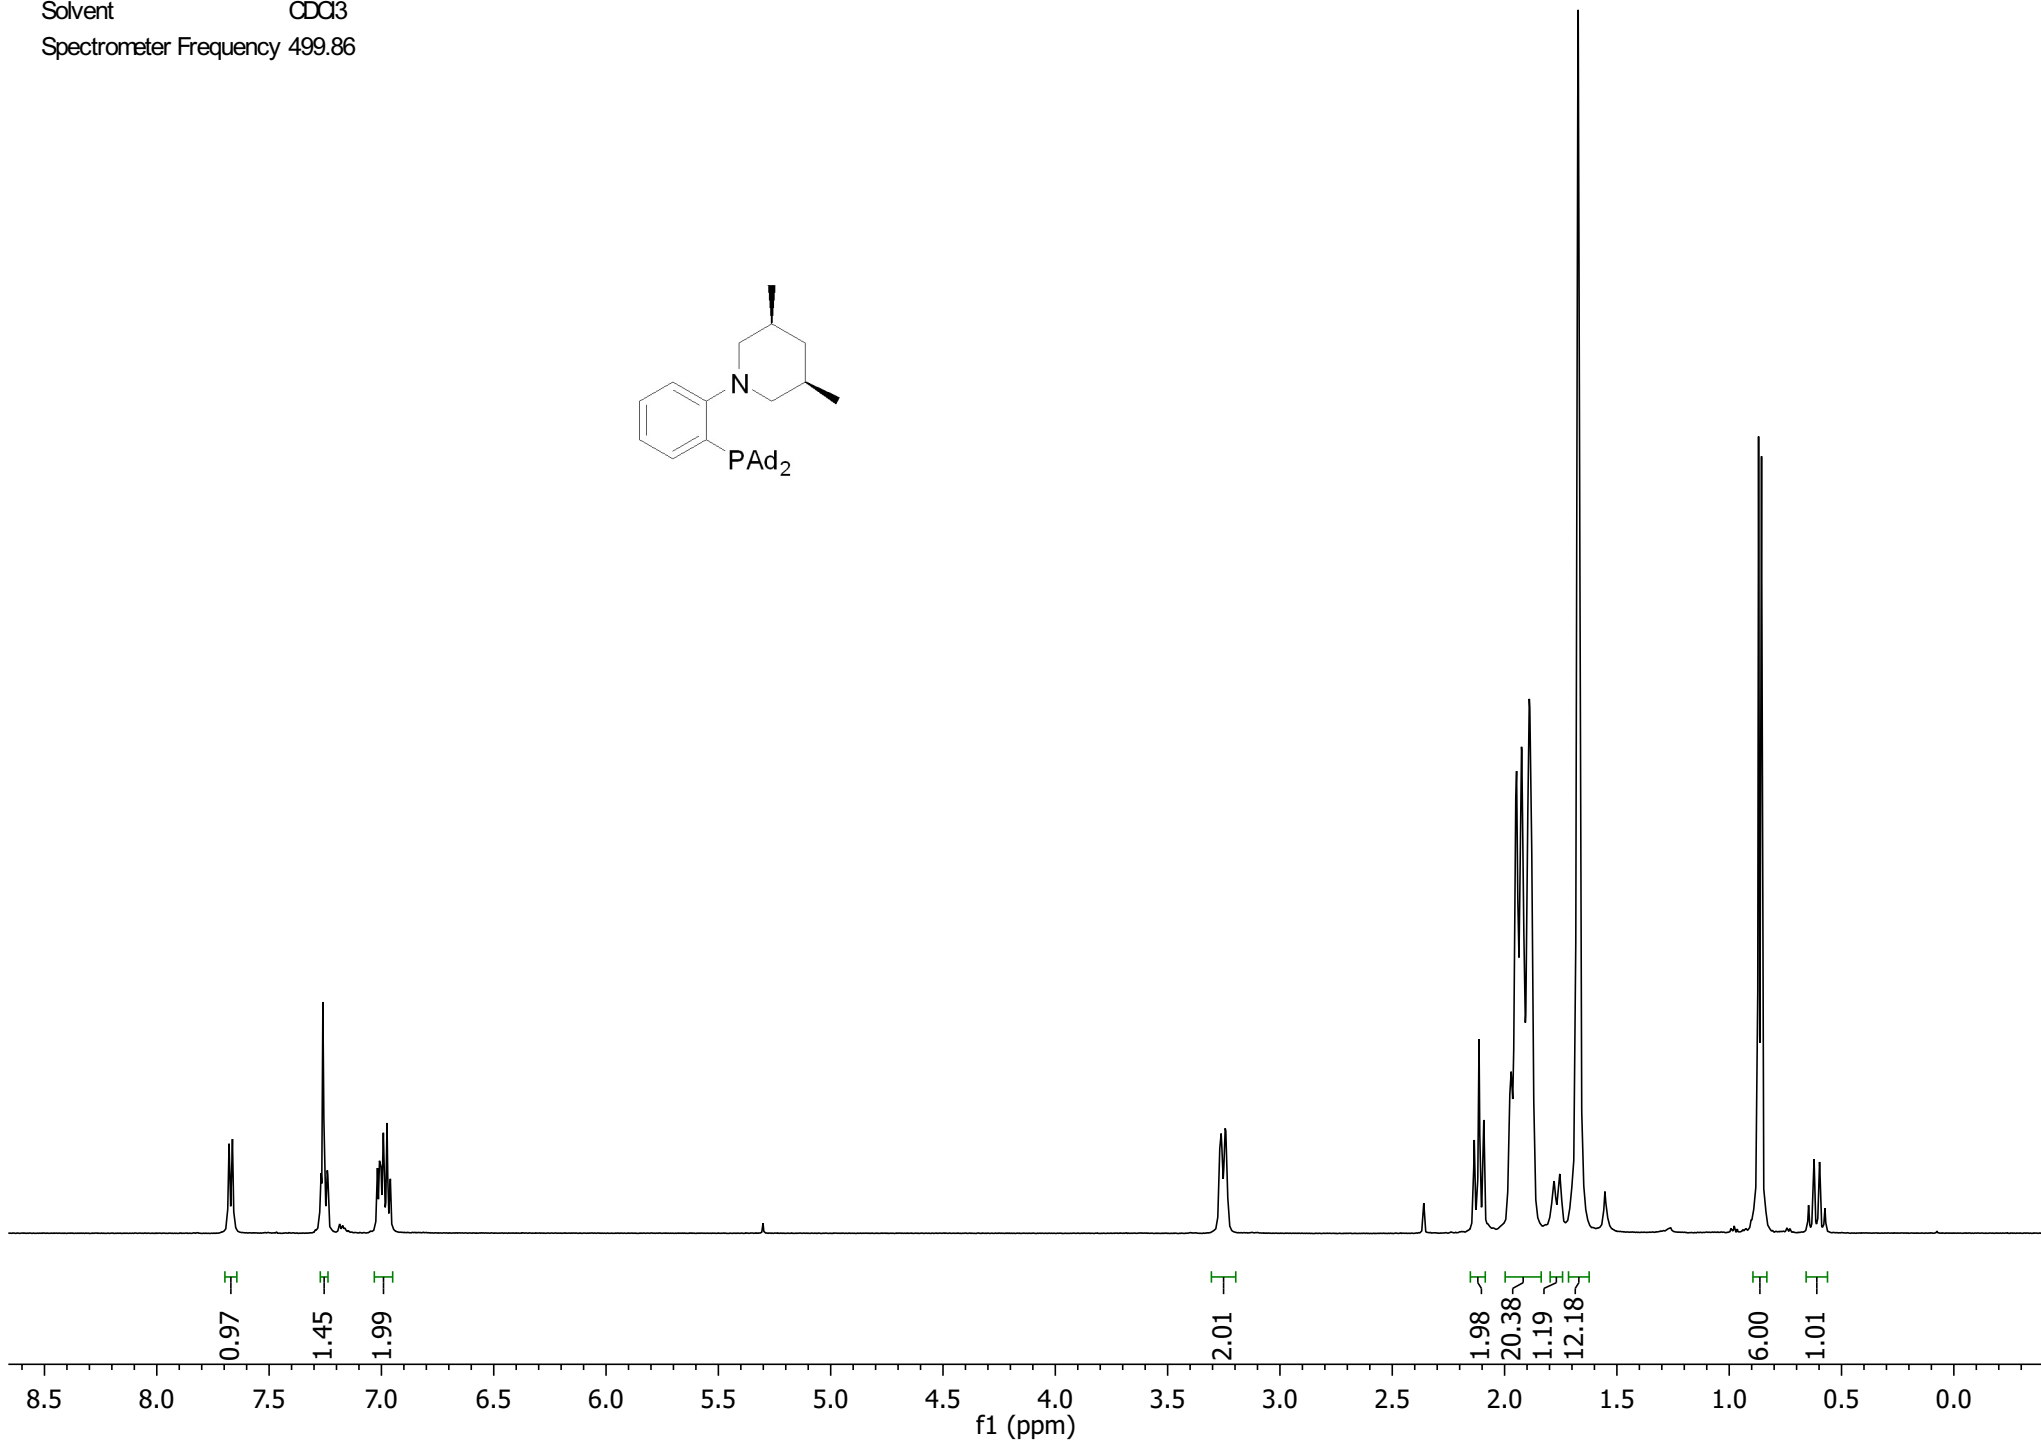

Title jkg-V-21B-Ligand-C13  
Solvent CDCl3  
Spectrometer Frequency 125.70

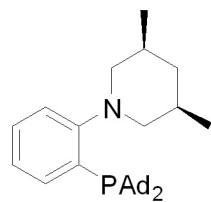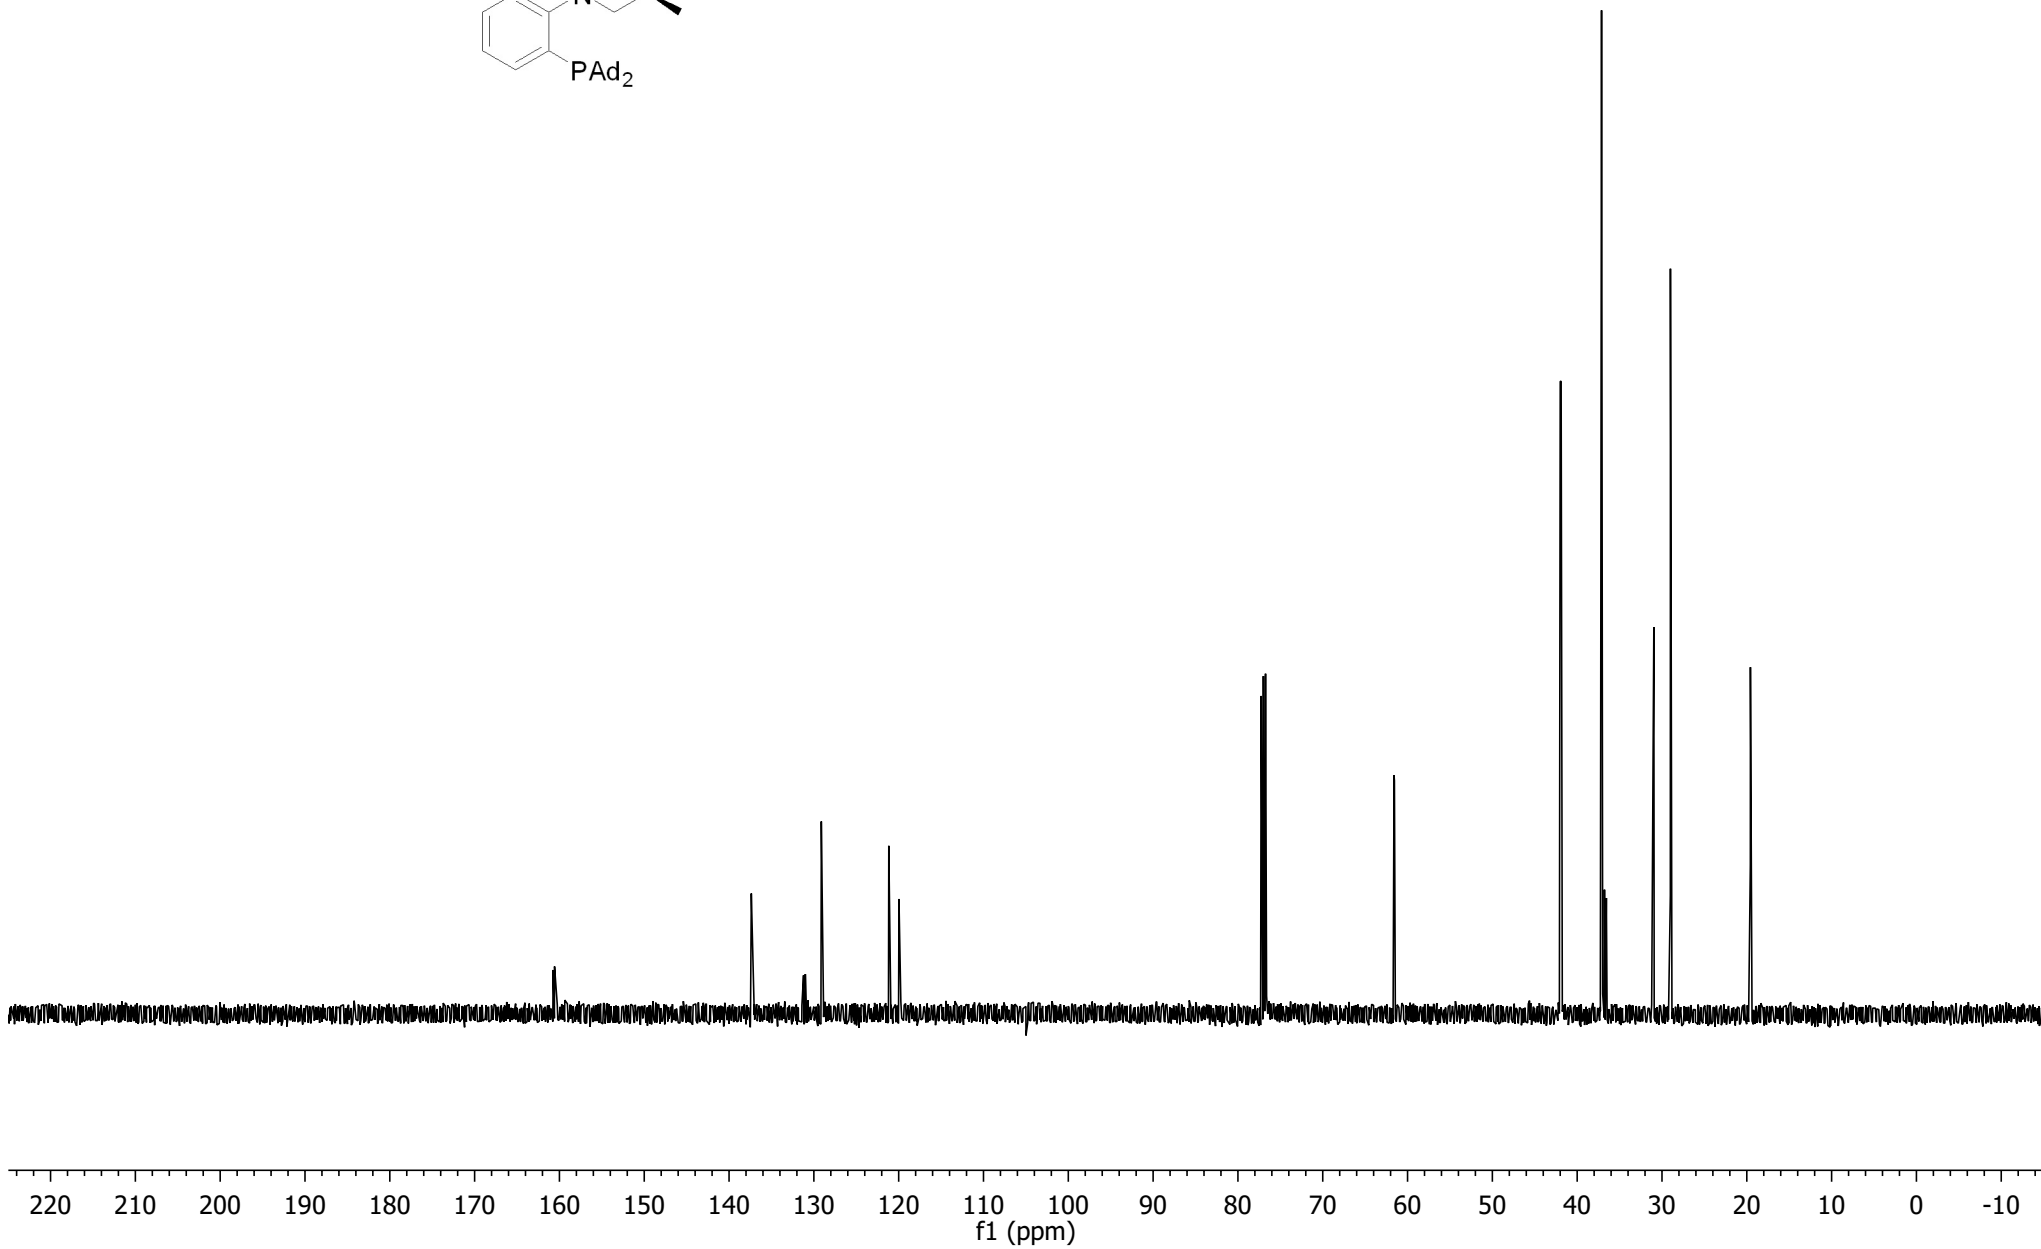

Title jkg-V-21b-P31  
Solvent cdcl3  
Spectrometer Frequency 161.90

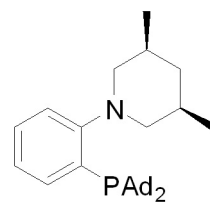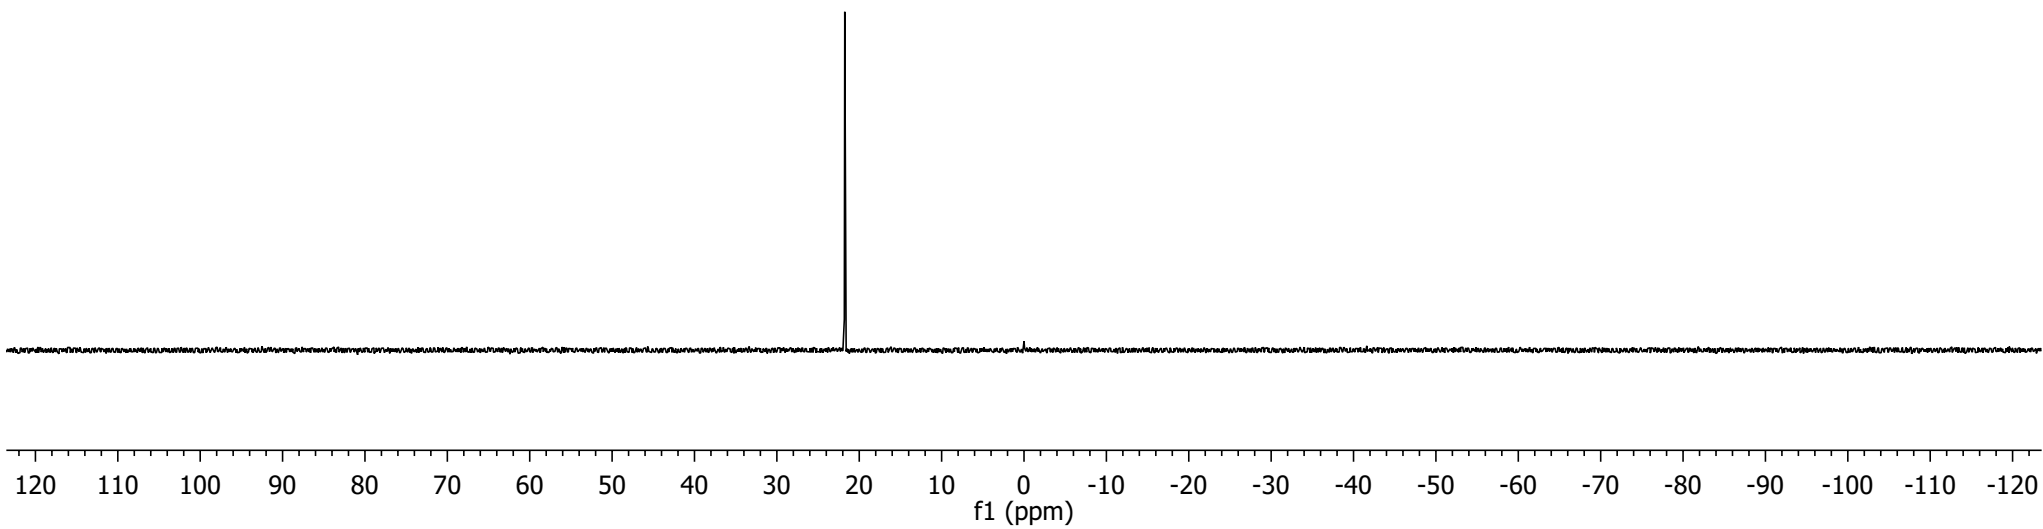



Title jkg-V-25-1-LAuCl-H  
Solvent CDCl3  
Spectrometer Frequency 499.86

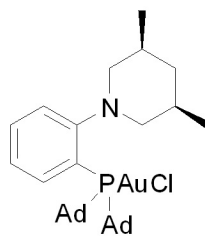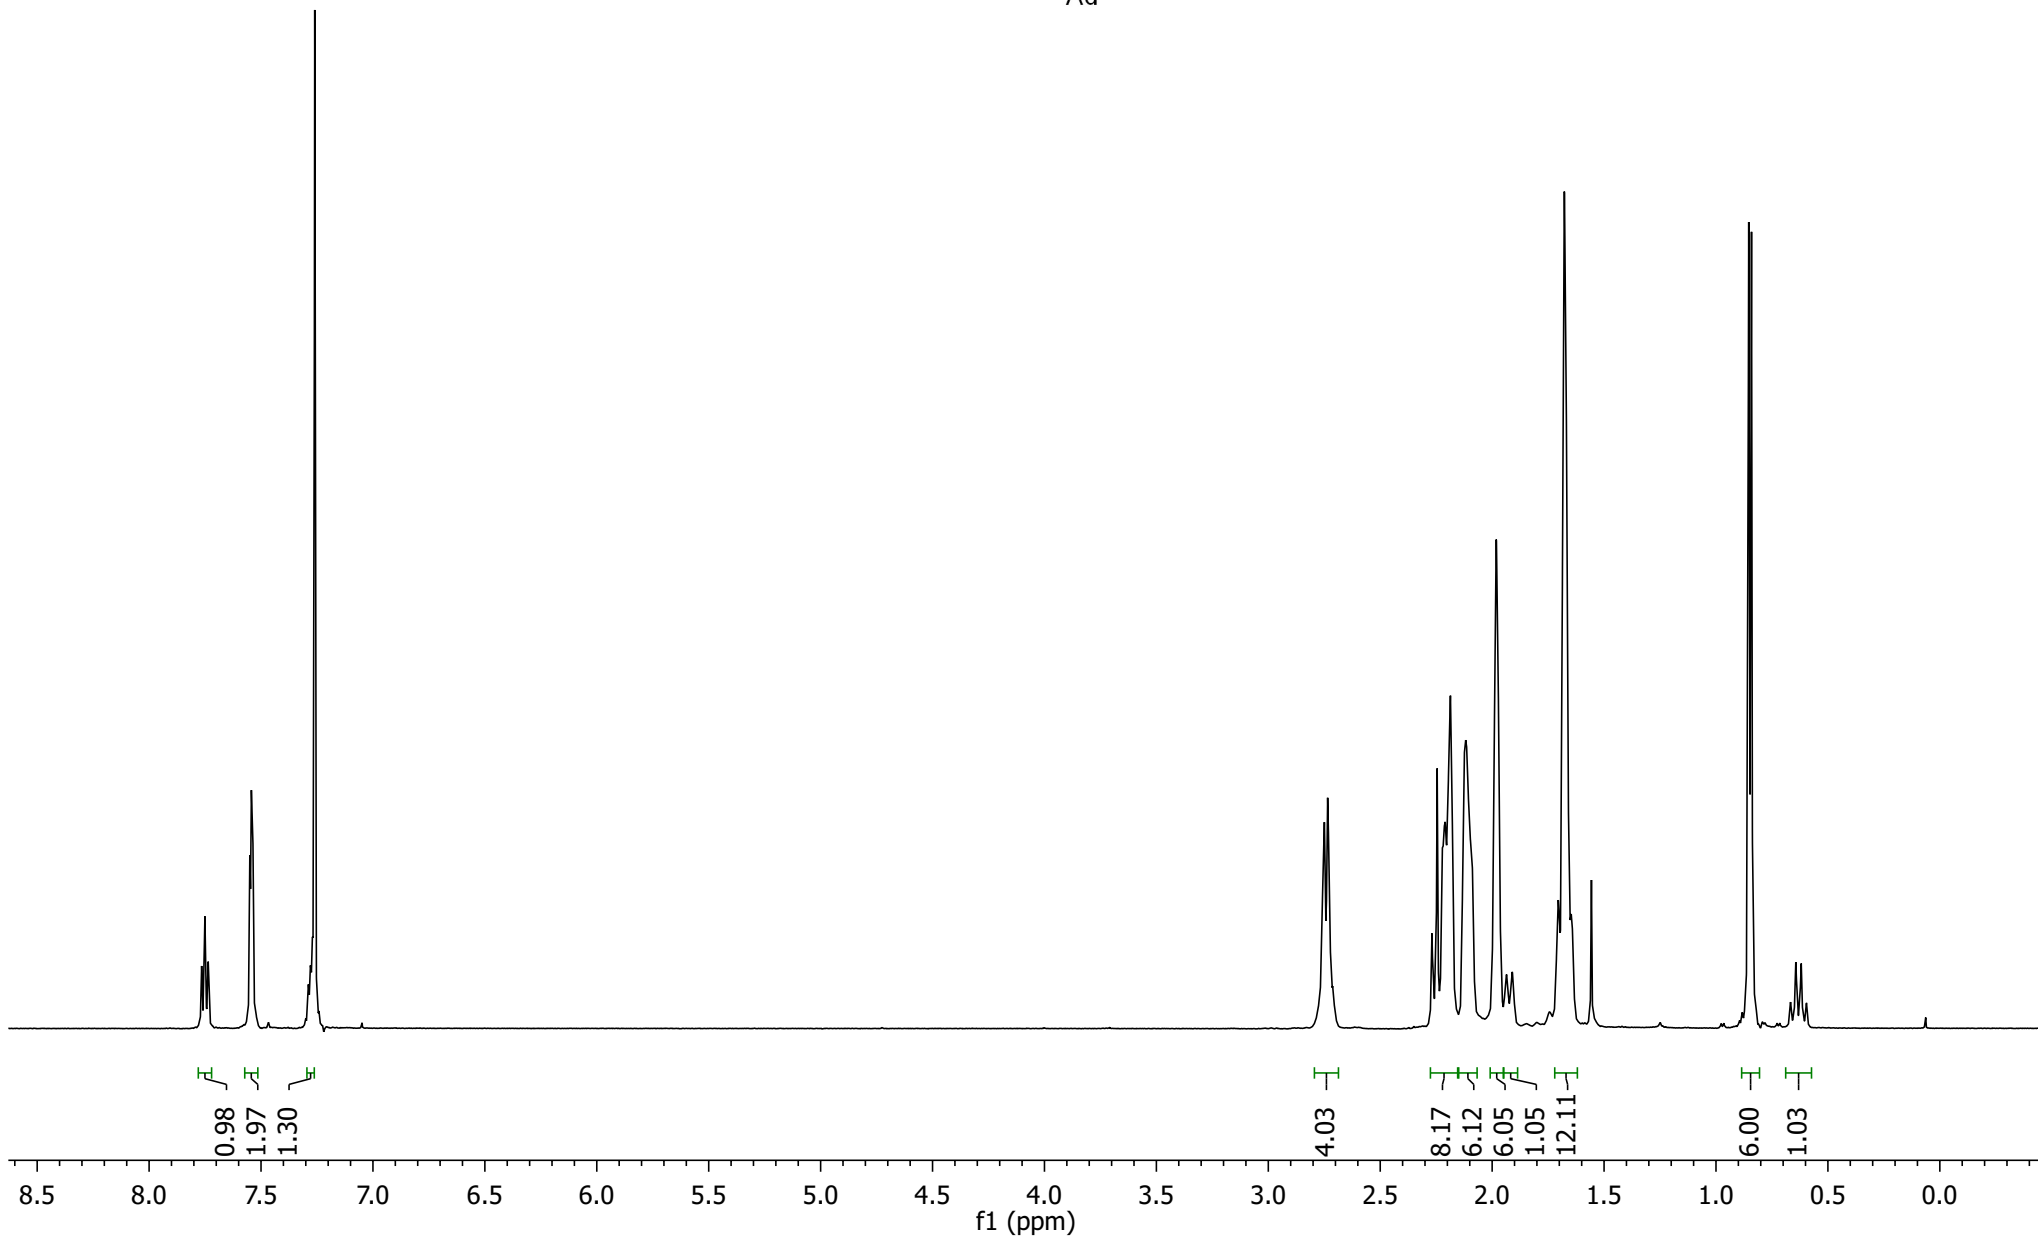

Title jkg-V-25-1-LAuCl-C13  
Solvent CDCl3  
Spectrometer Frequency 125.70

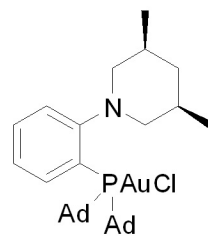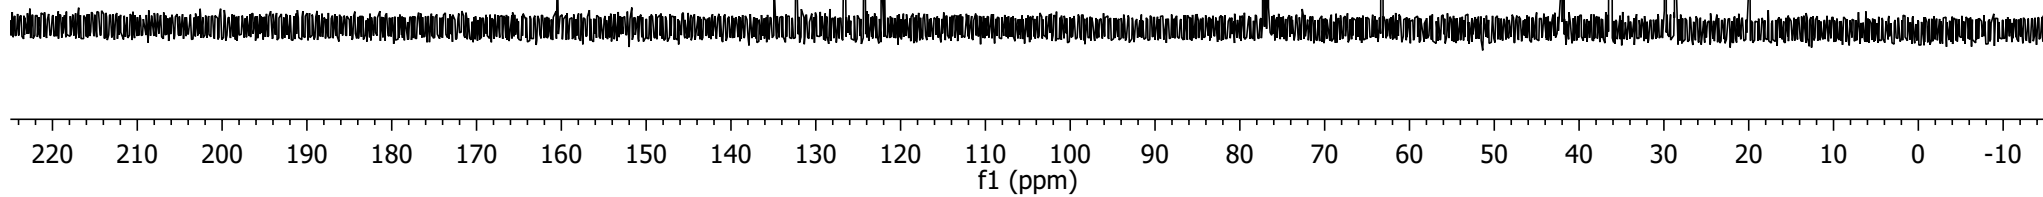

Title jkg-V-25-1-LAuCl-P31  
Solvent cdcl3  
Spectrometer Frequency 161.90

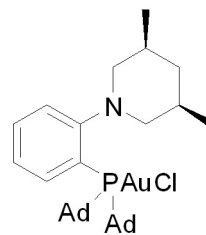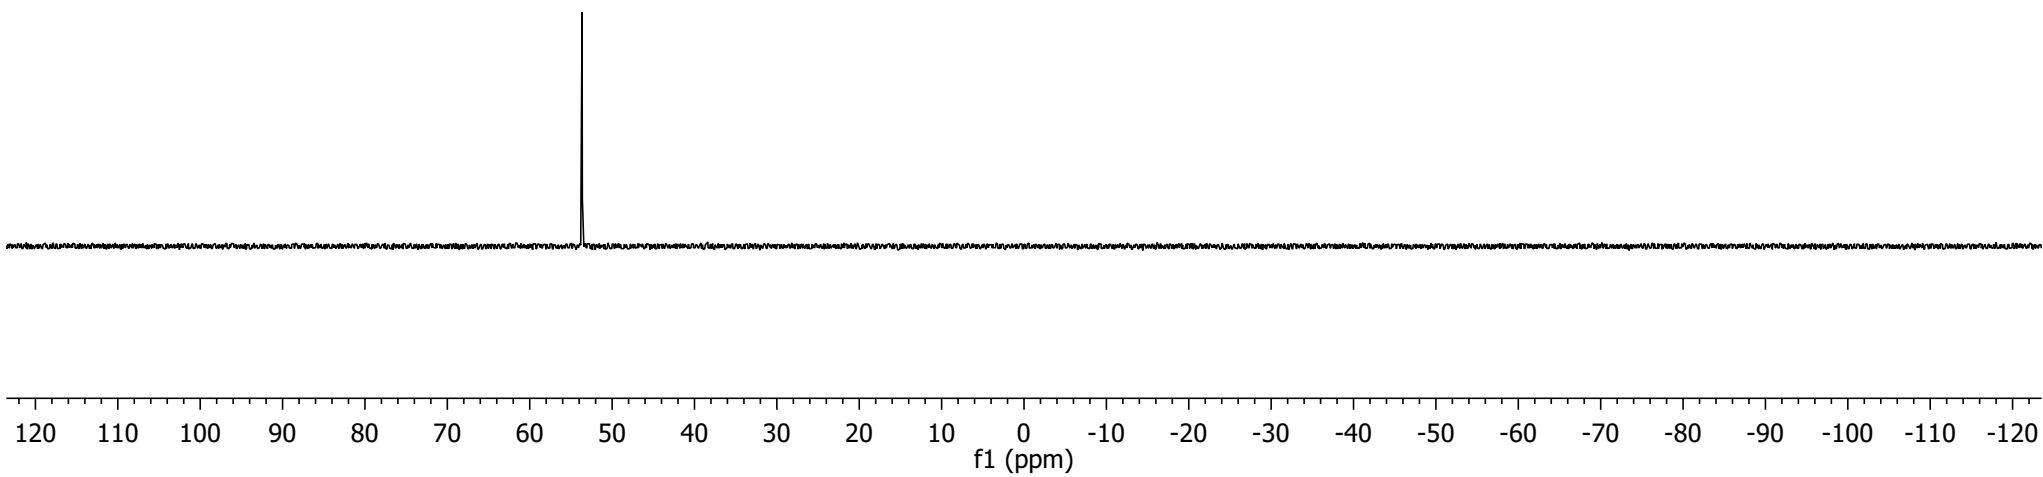

Title jkg-IV-113-Ligand-H  
Solvent CDCl3  
Spectrometer Frequency 499.86

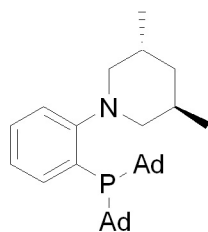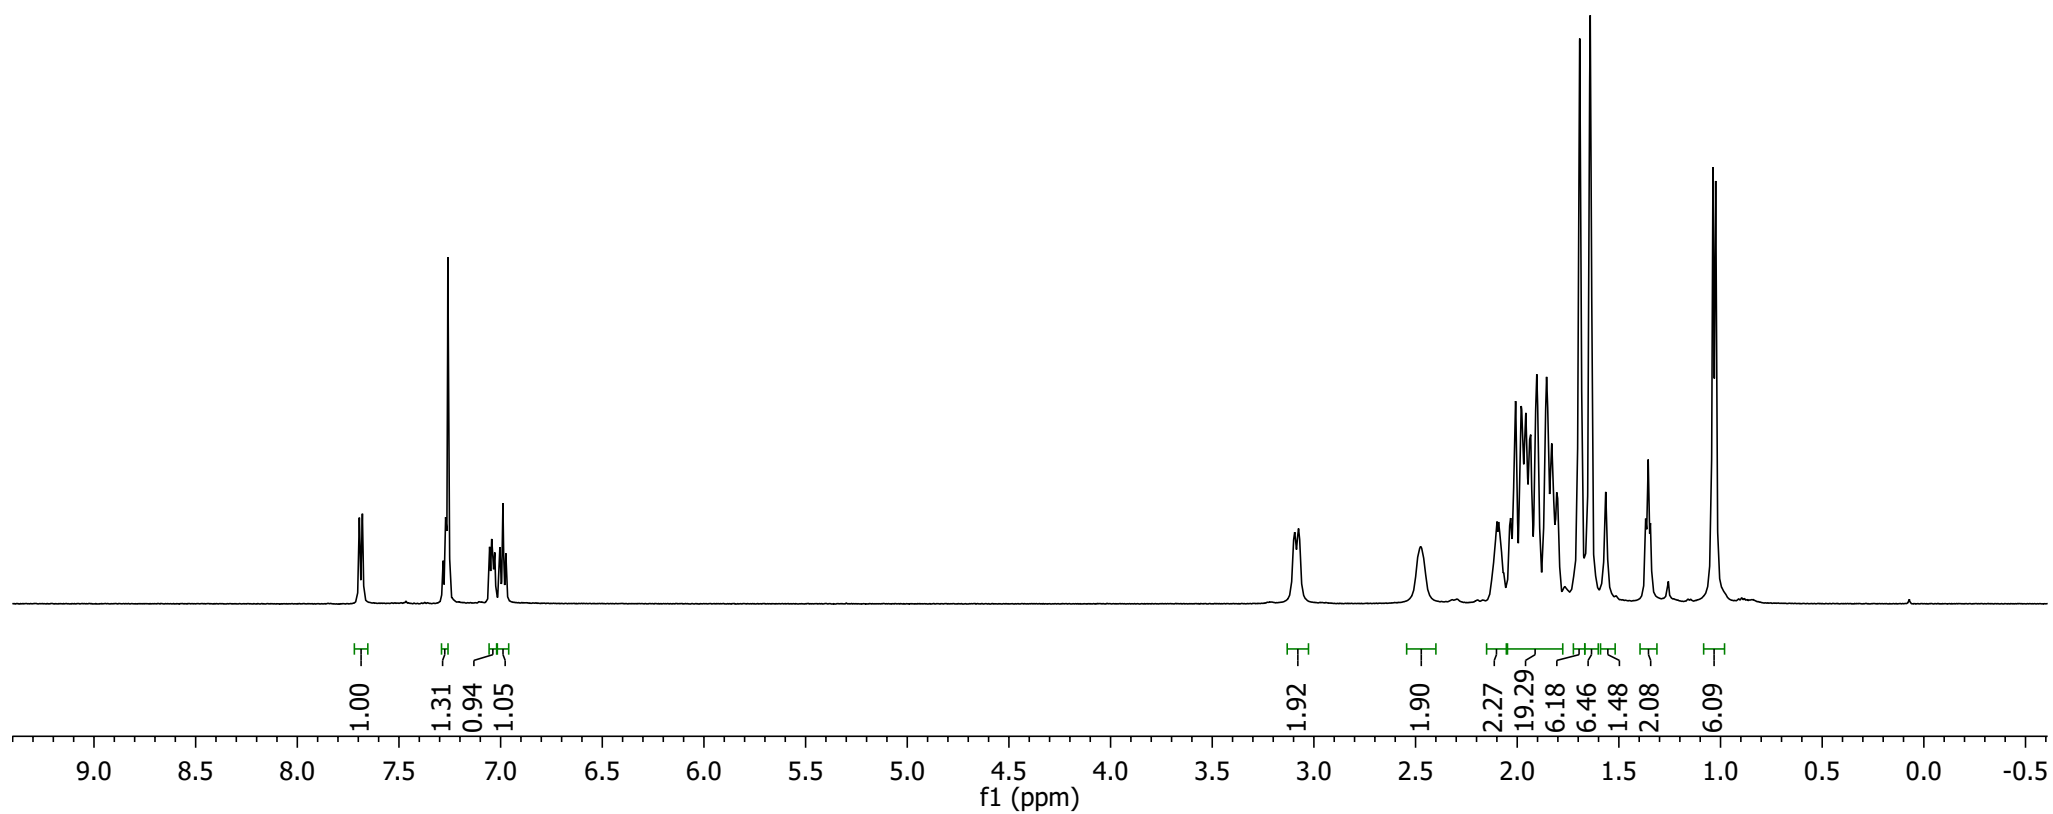

Title jkg-IV-113-Ligand-C  
Solvent CDCl3  
Spectrometer Frequency 125.70

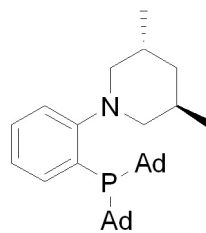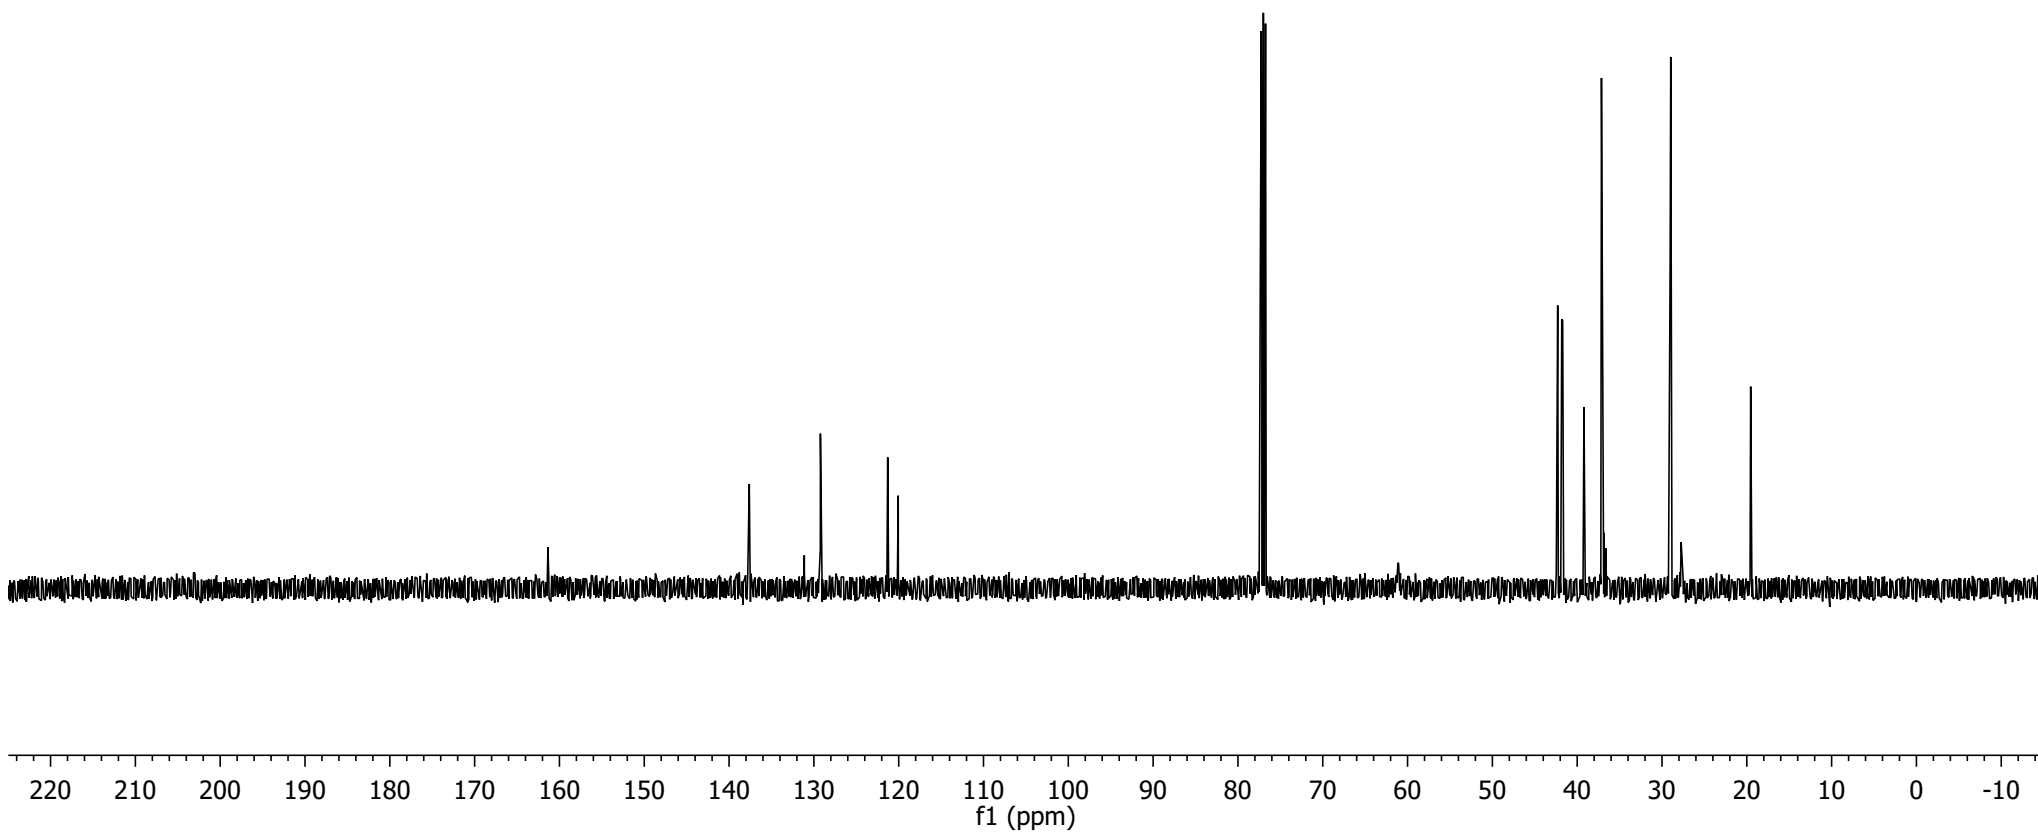

Title jkg-IV-113b-P31  
Solvent cdcl3  
Spectrometer Frequency 161.90

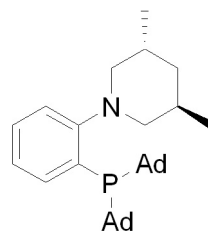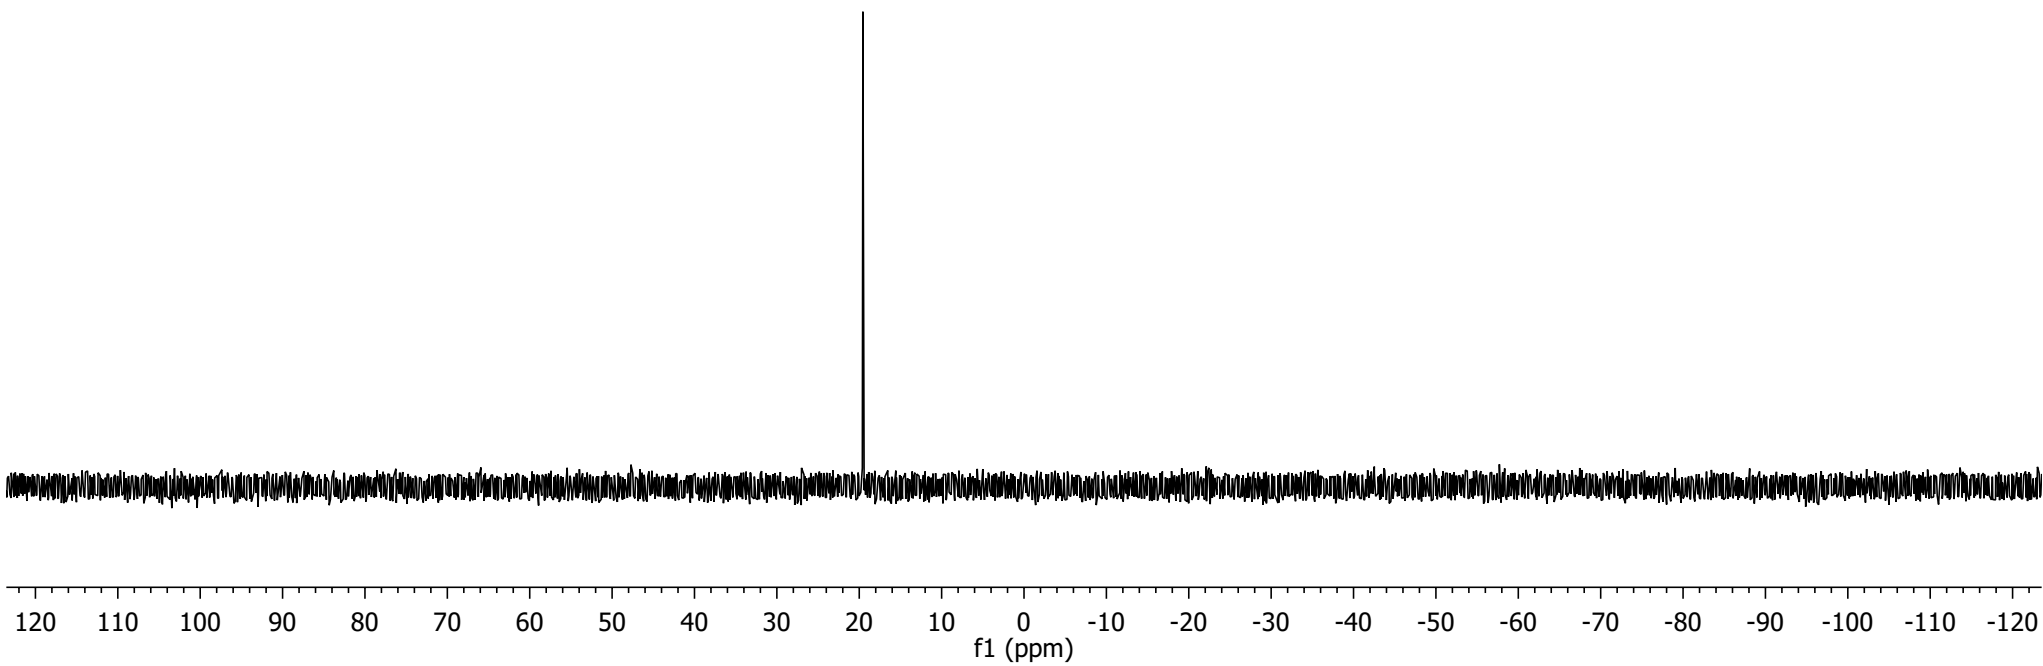

Title jkg-IV-114B-ligand-H  
Solvent cdcl3  
Spectrometer Frequency 599.64

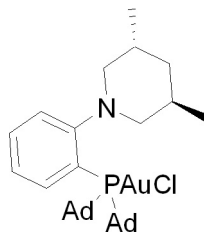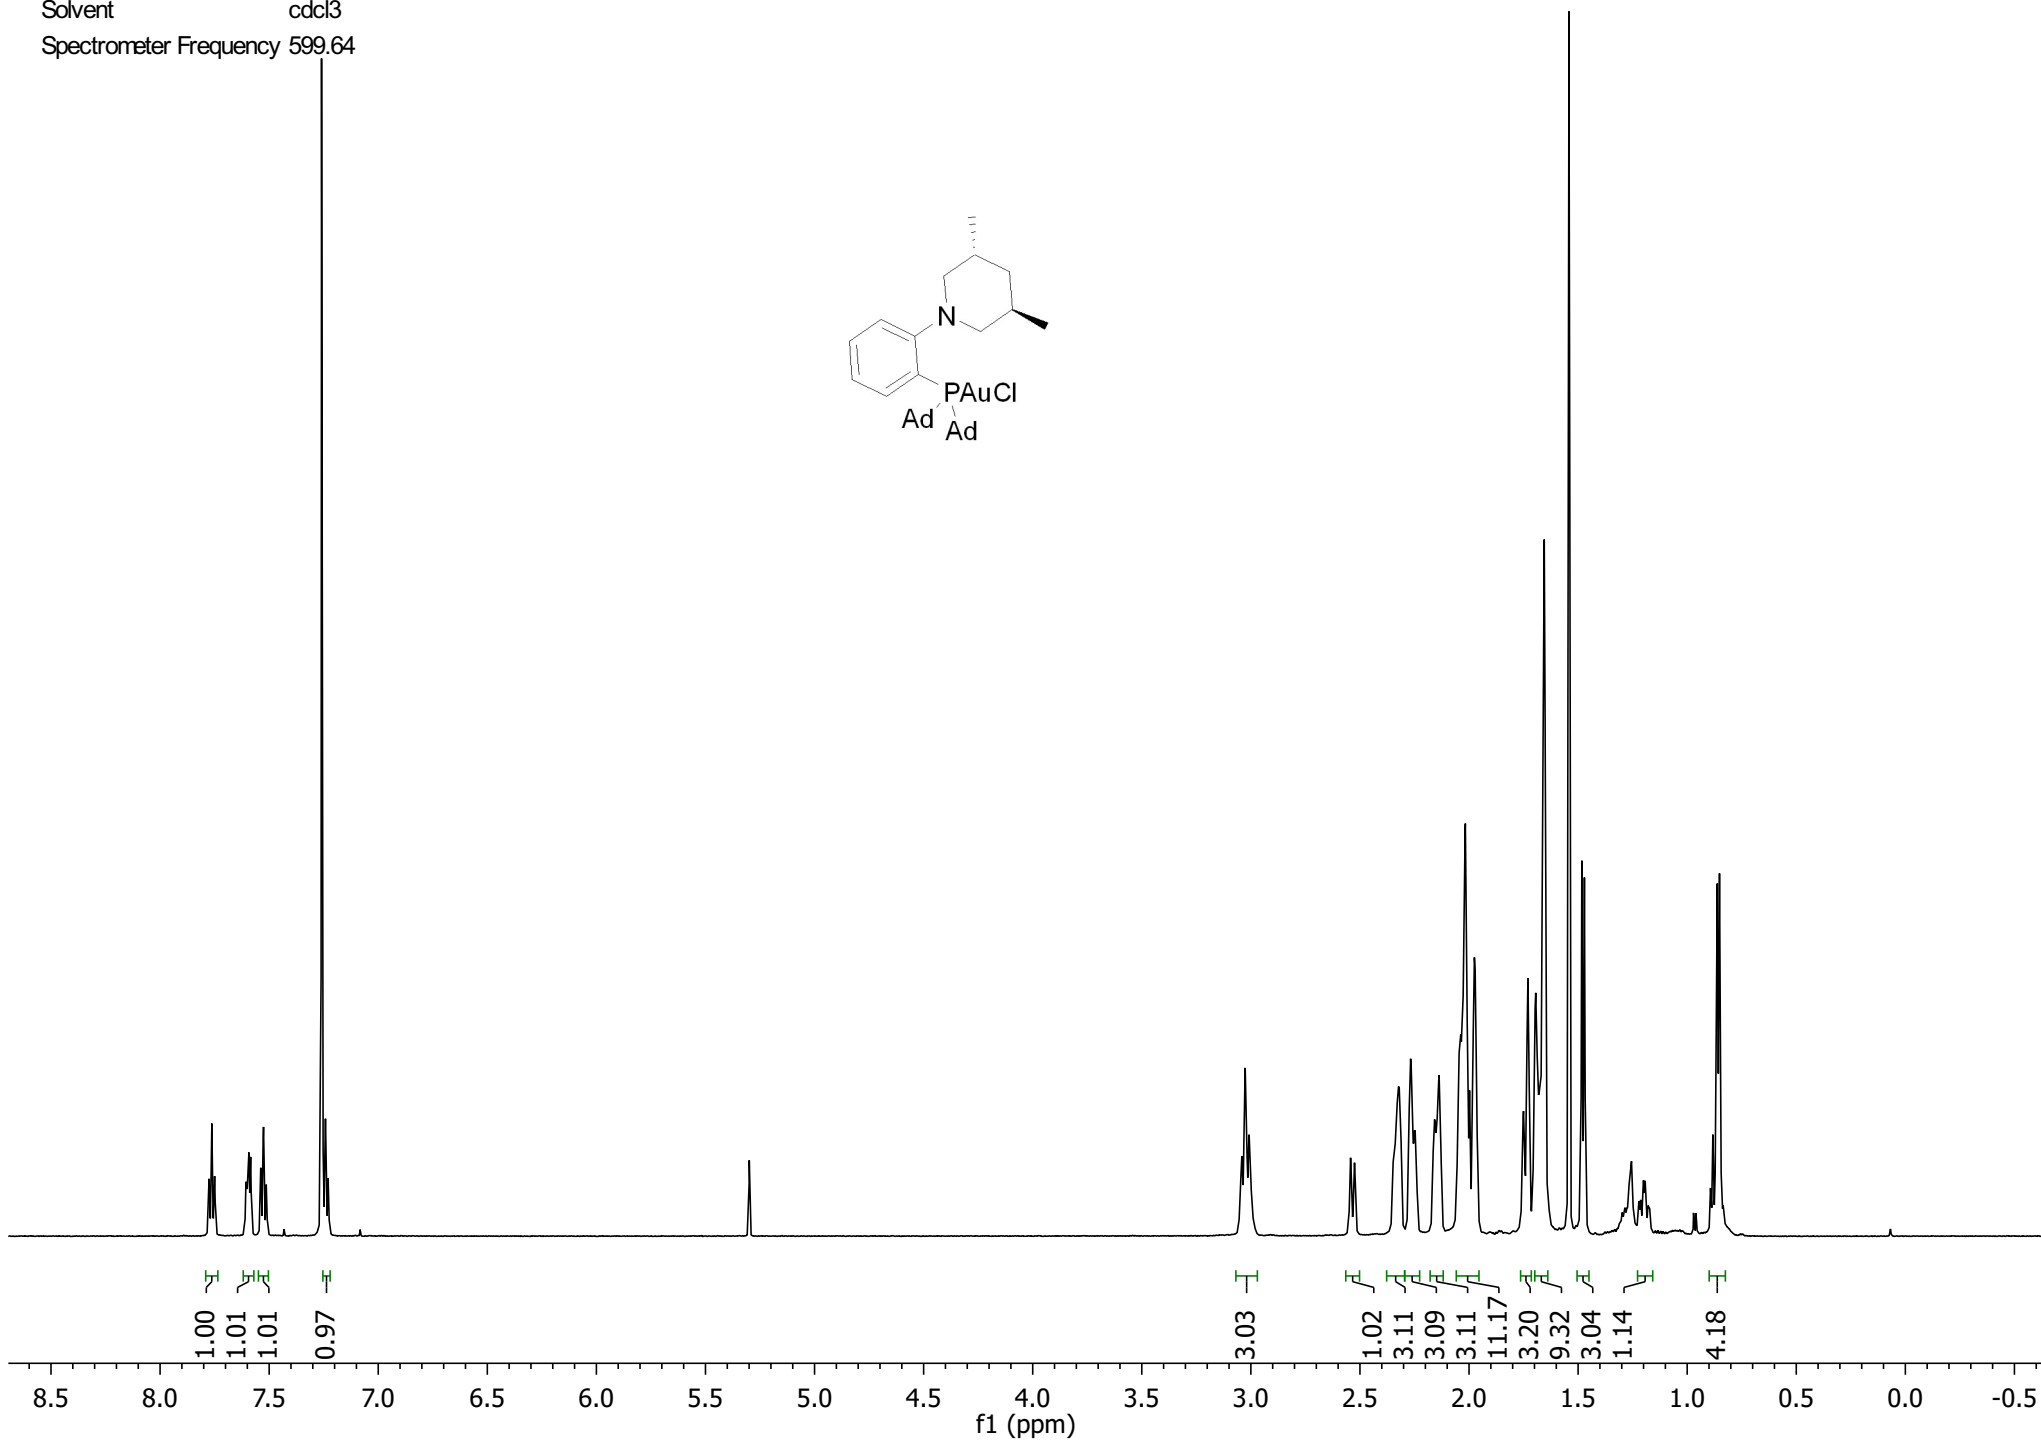

Title jkg-IV-114B-ligand-C  
Solvent cdcl3  
Spectrometer Frequency 150.79

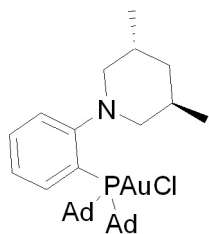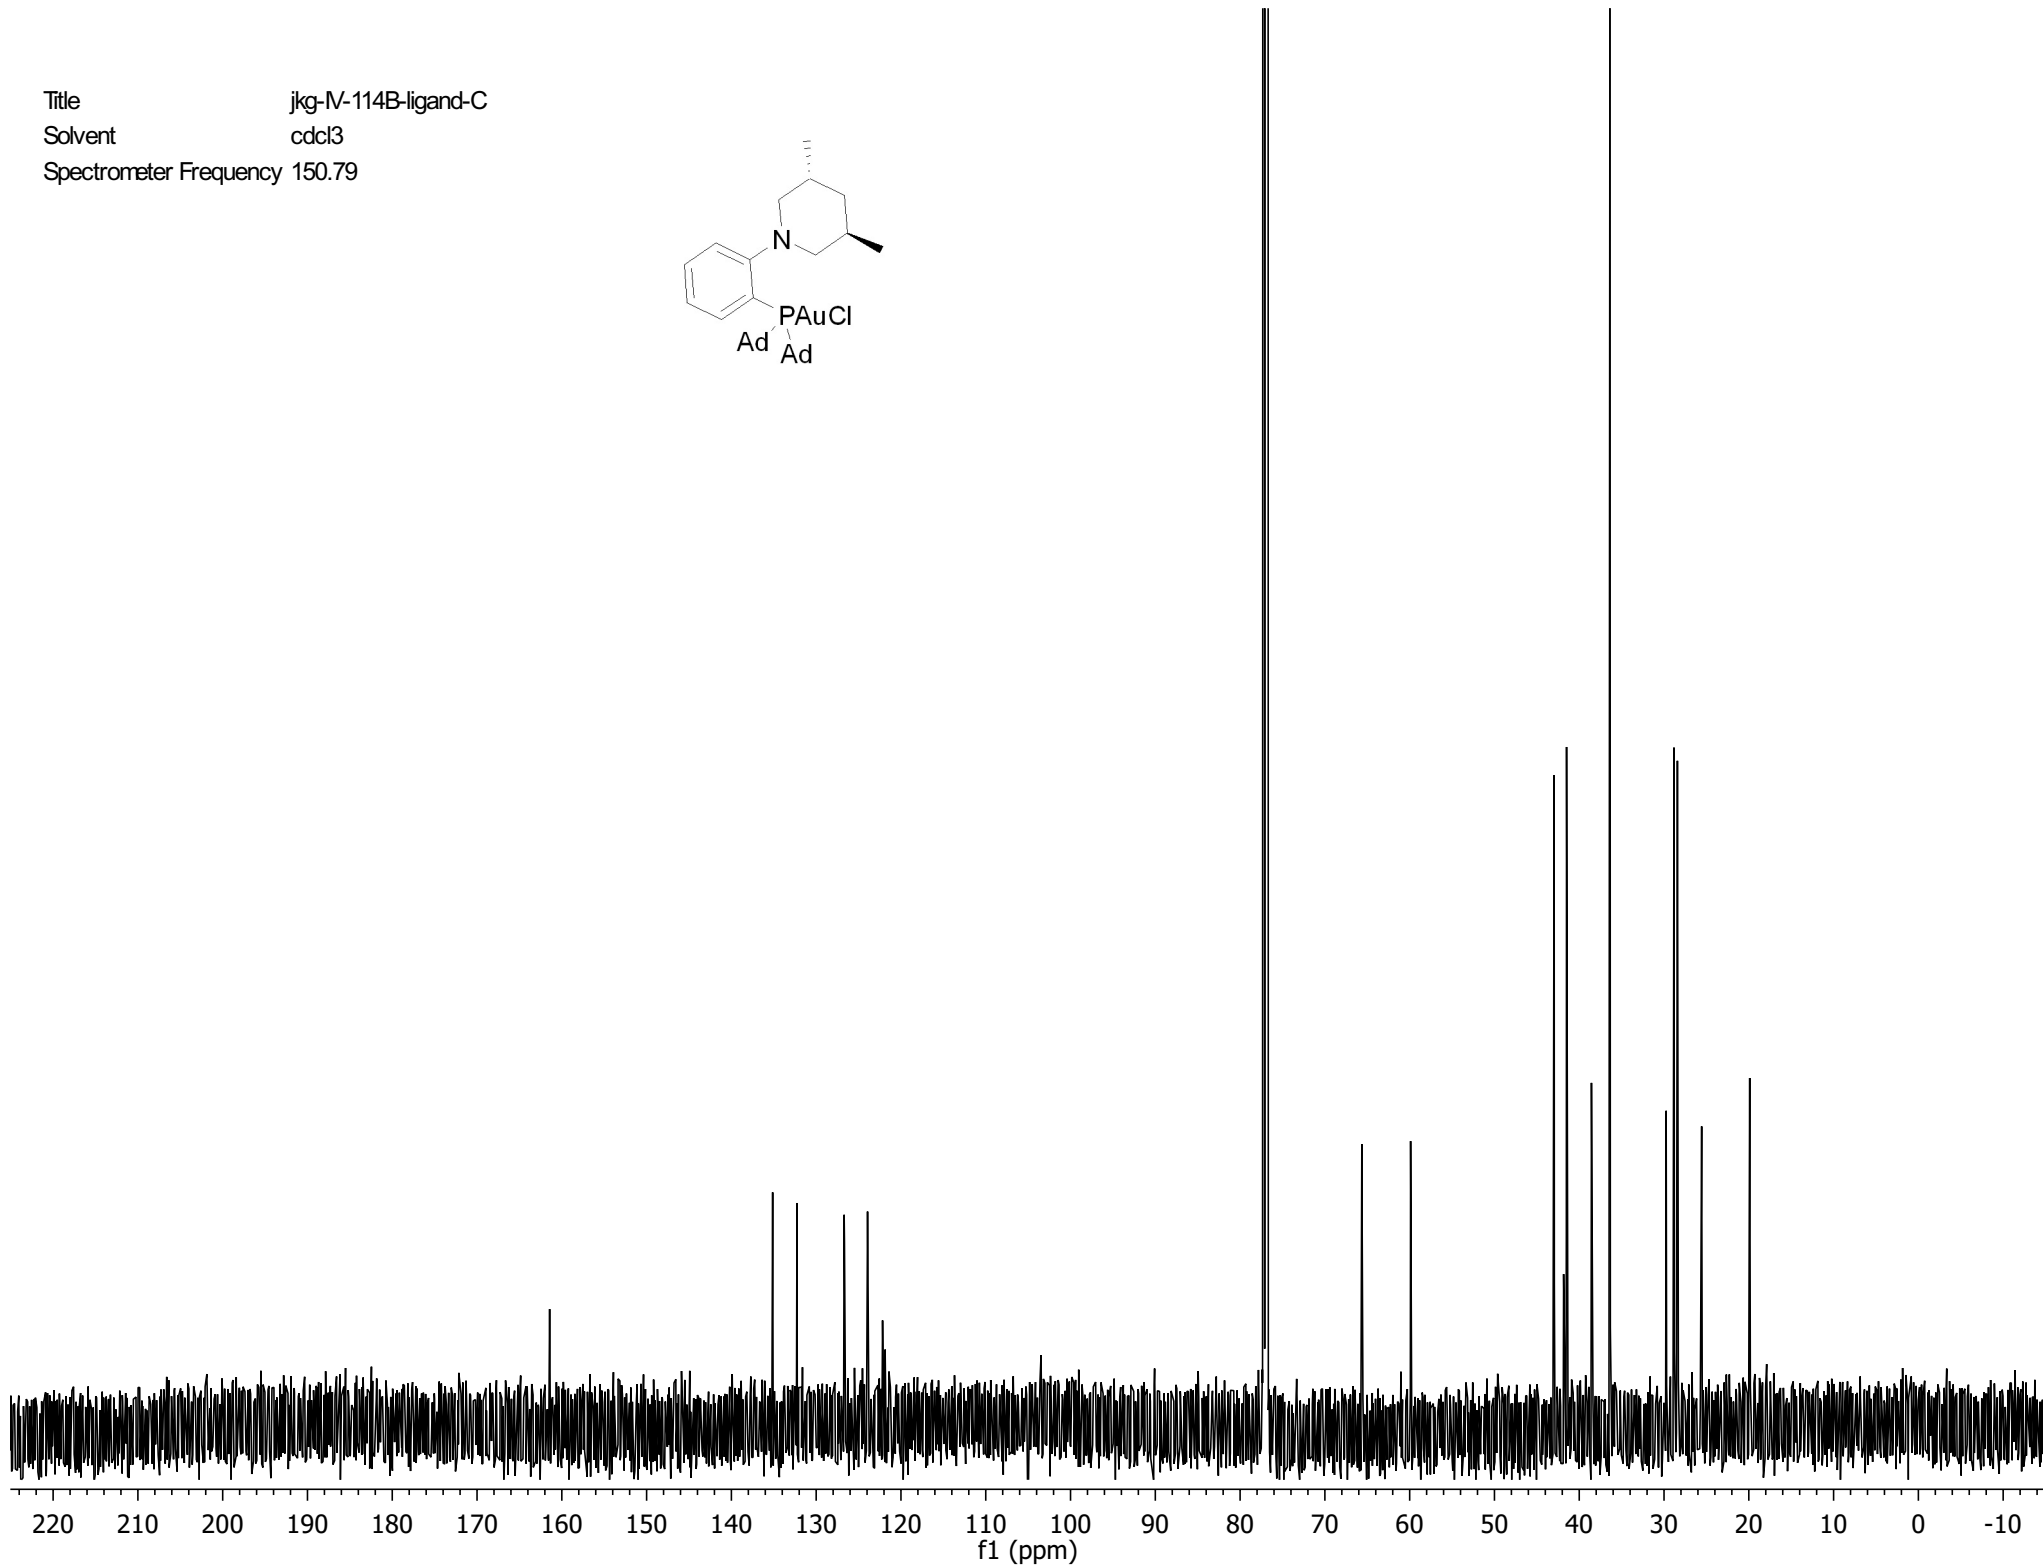



Title jkg-IV-114b-P31  
Solvent cdcl3  
Spectrometer Frequency 161.90

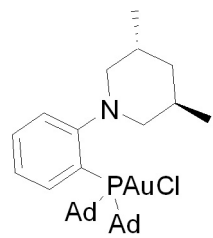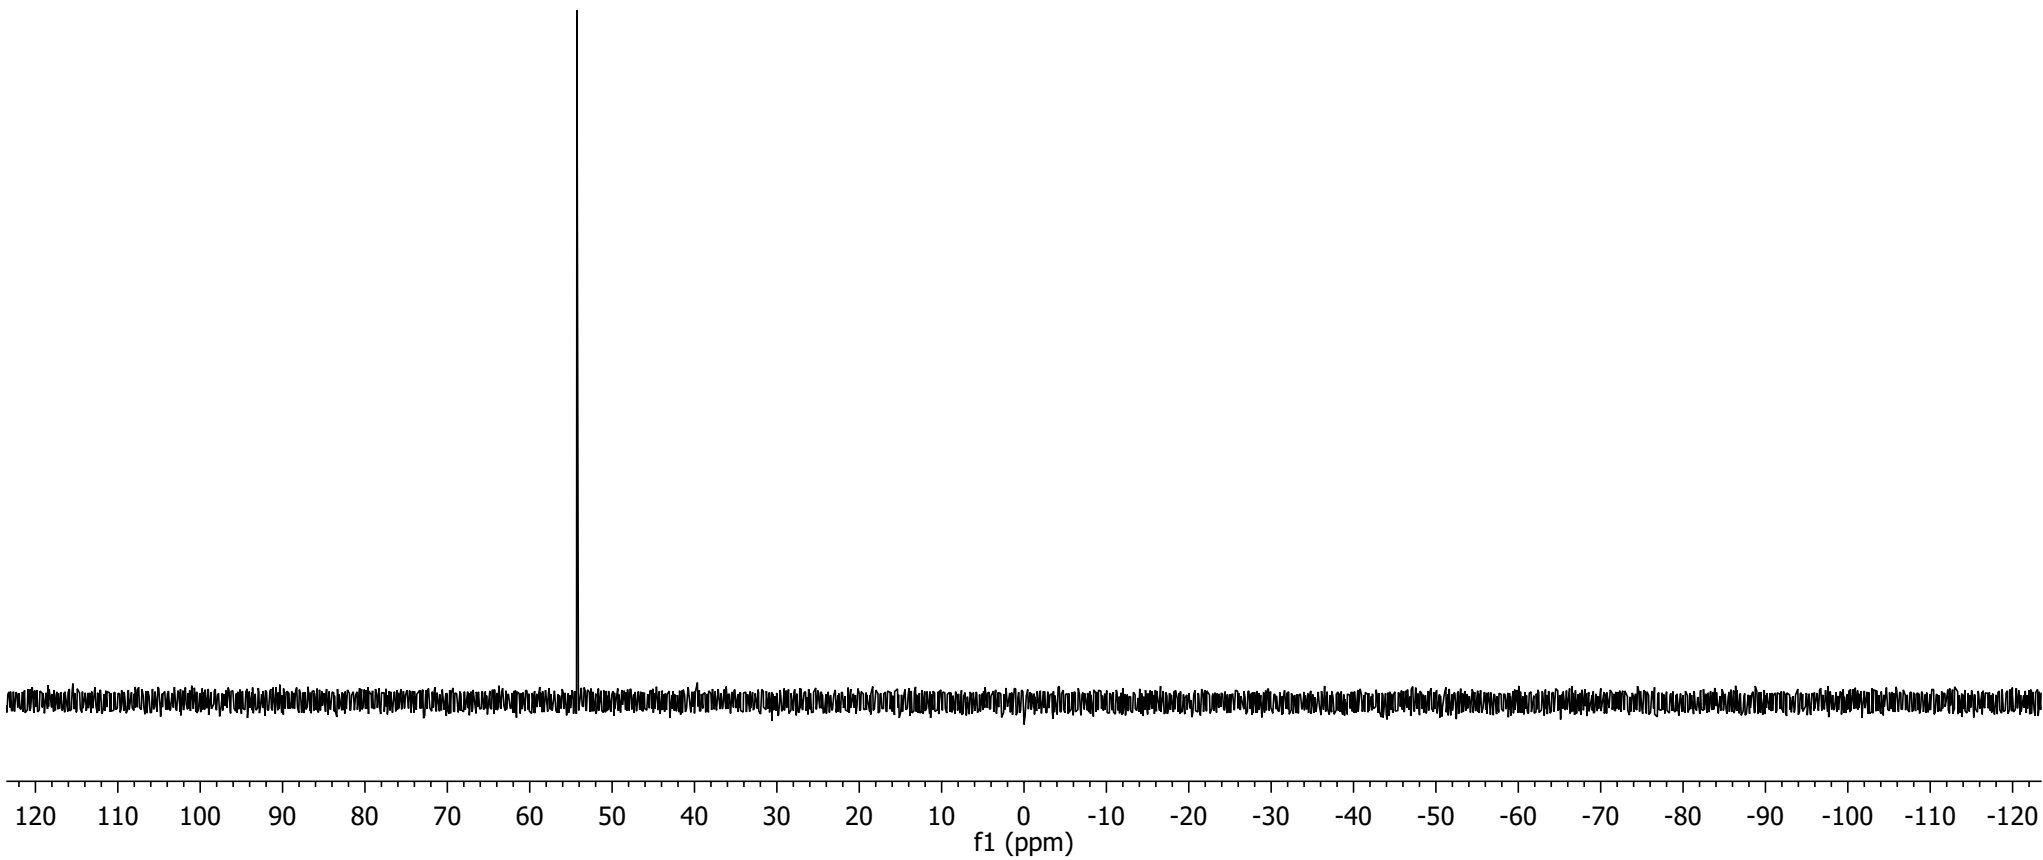

Title jkg-IV-84-ligand-H  
Solvent CDCl3  
Spectrometer Frequency 499.86

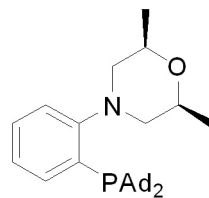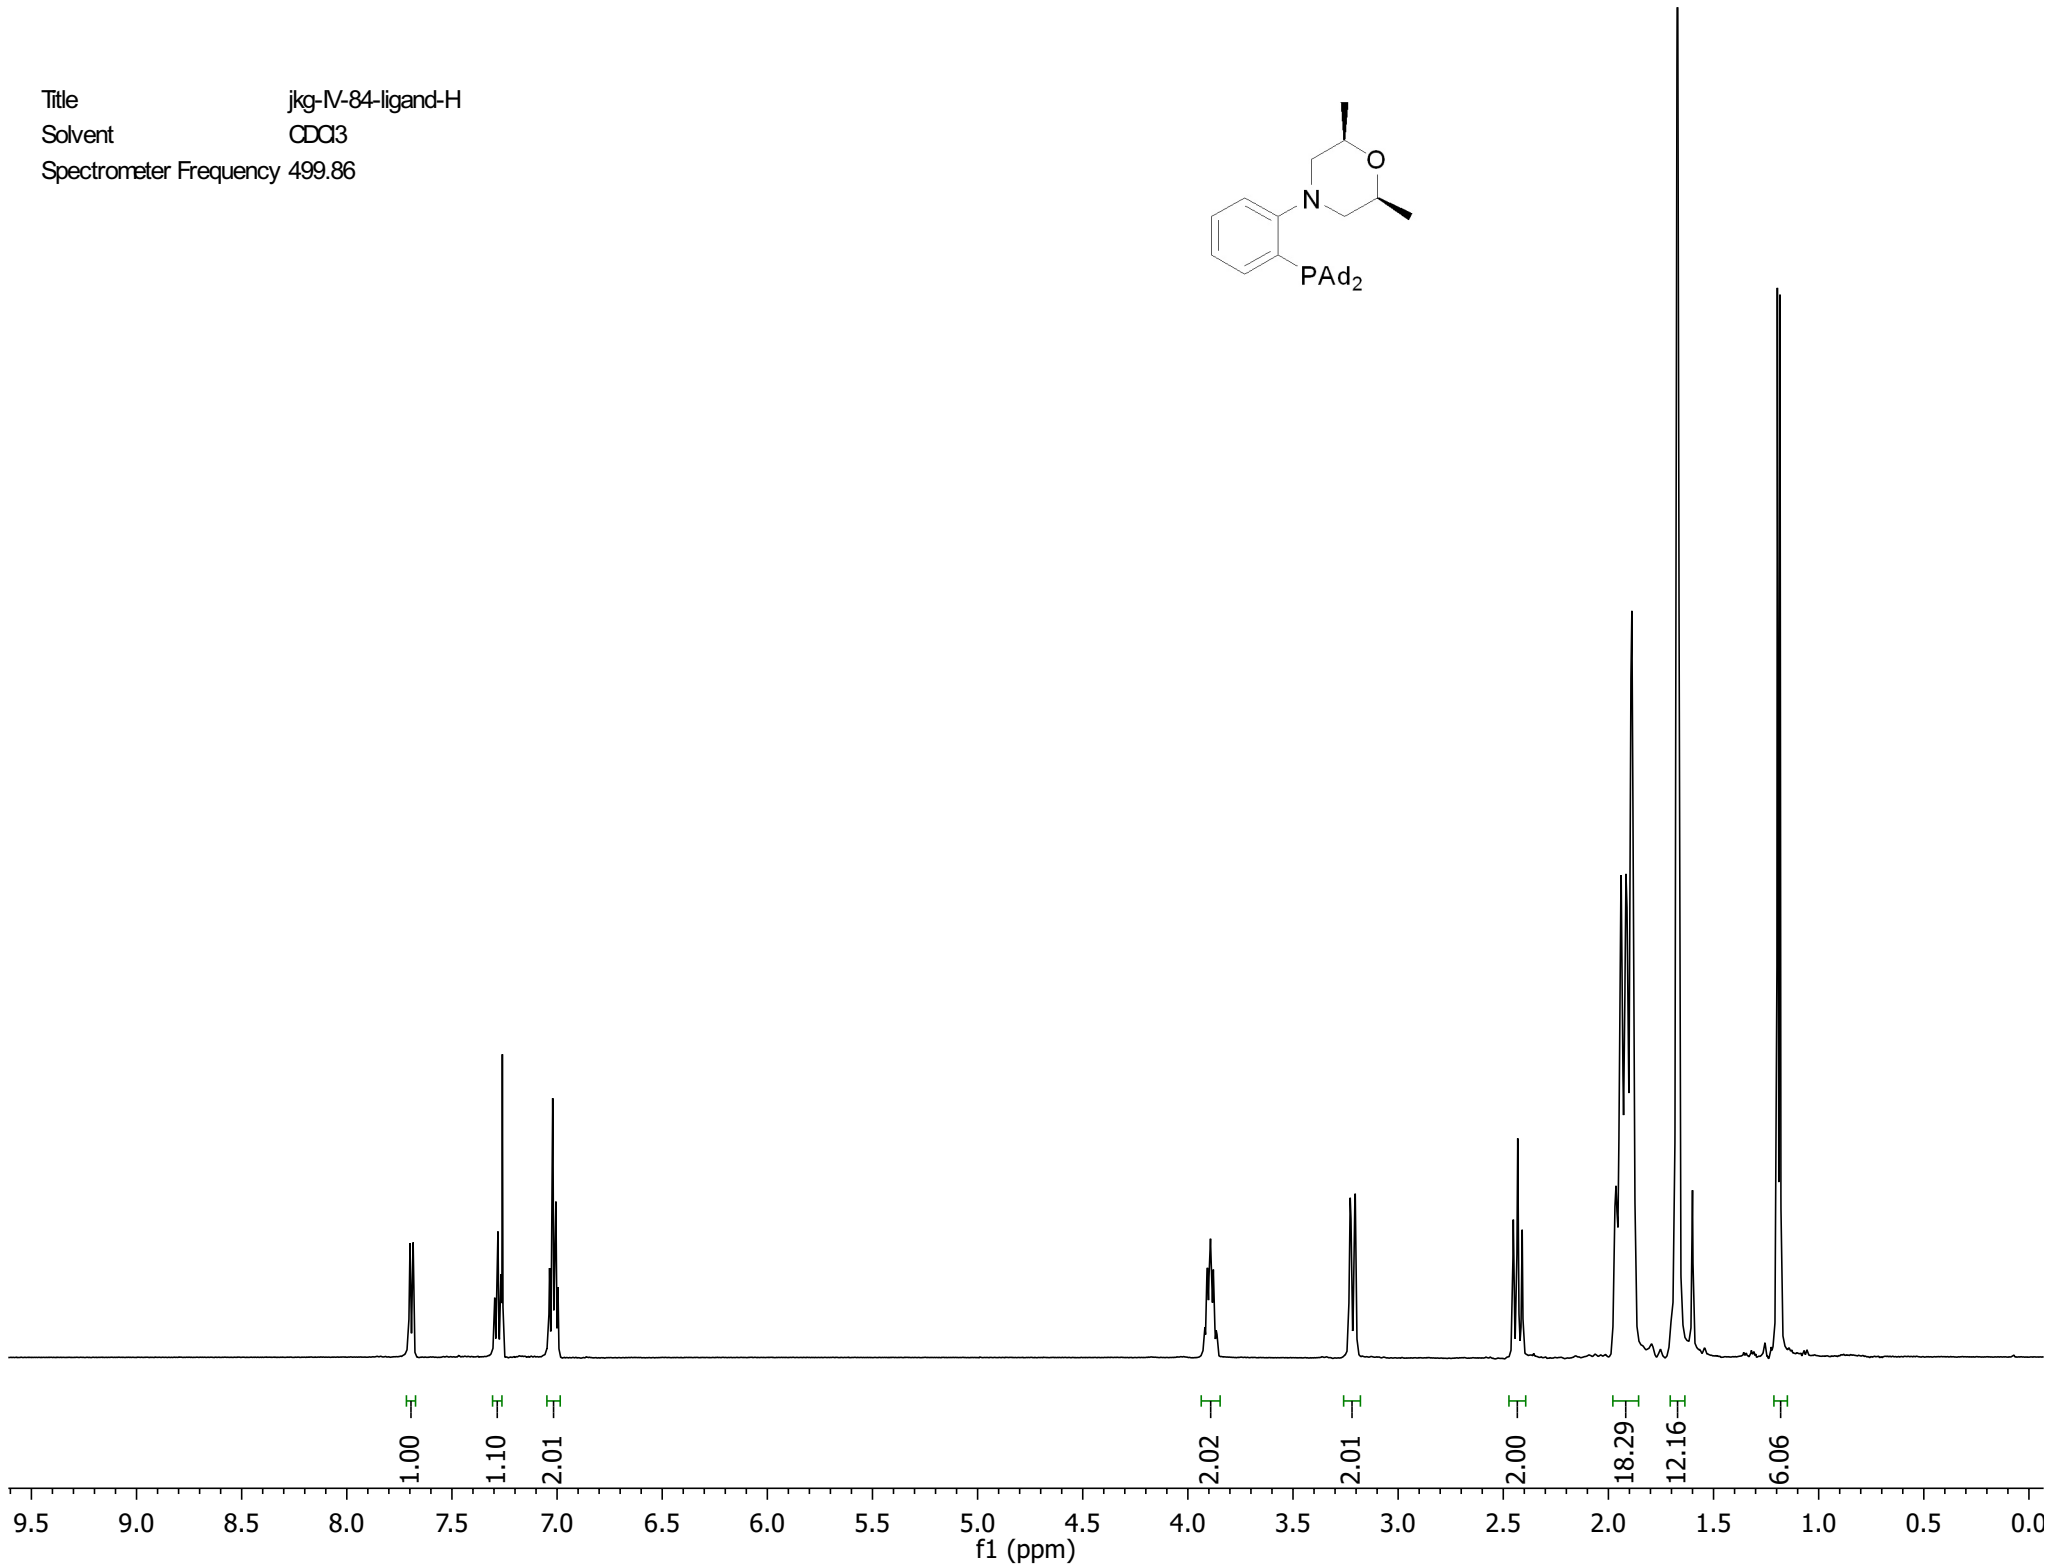

Title jkg-IV-84-ligand-C  
Solvent CDCl3  
Spectrometer Frequency 125.70

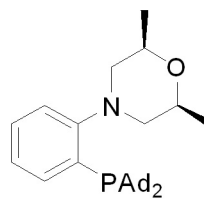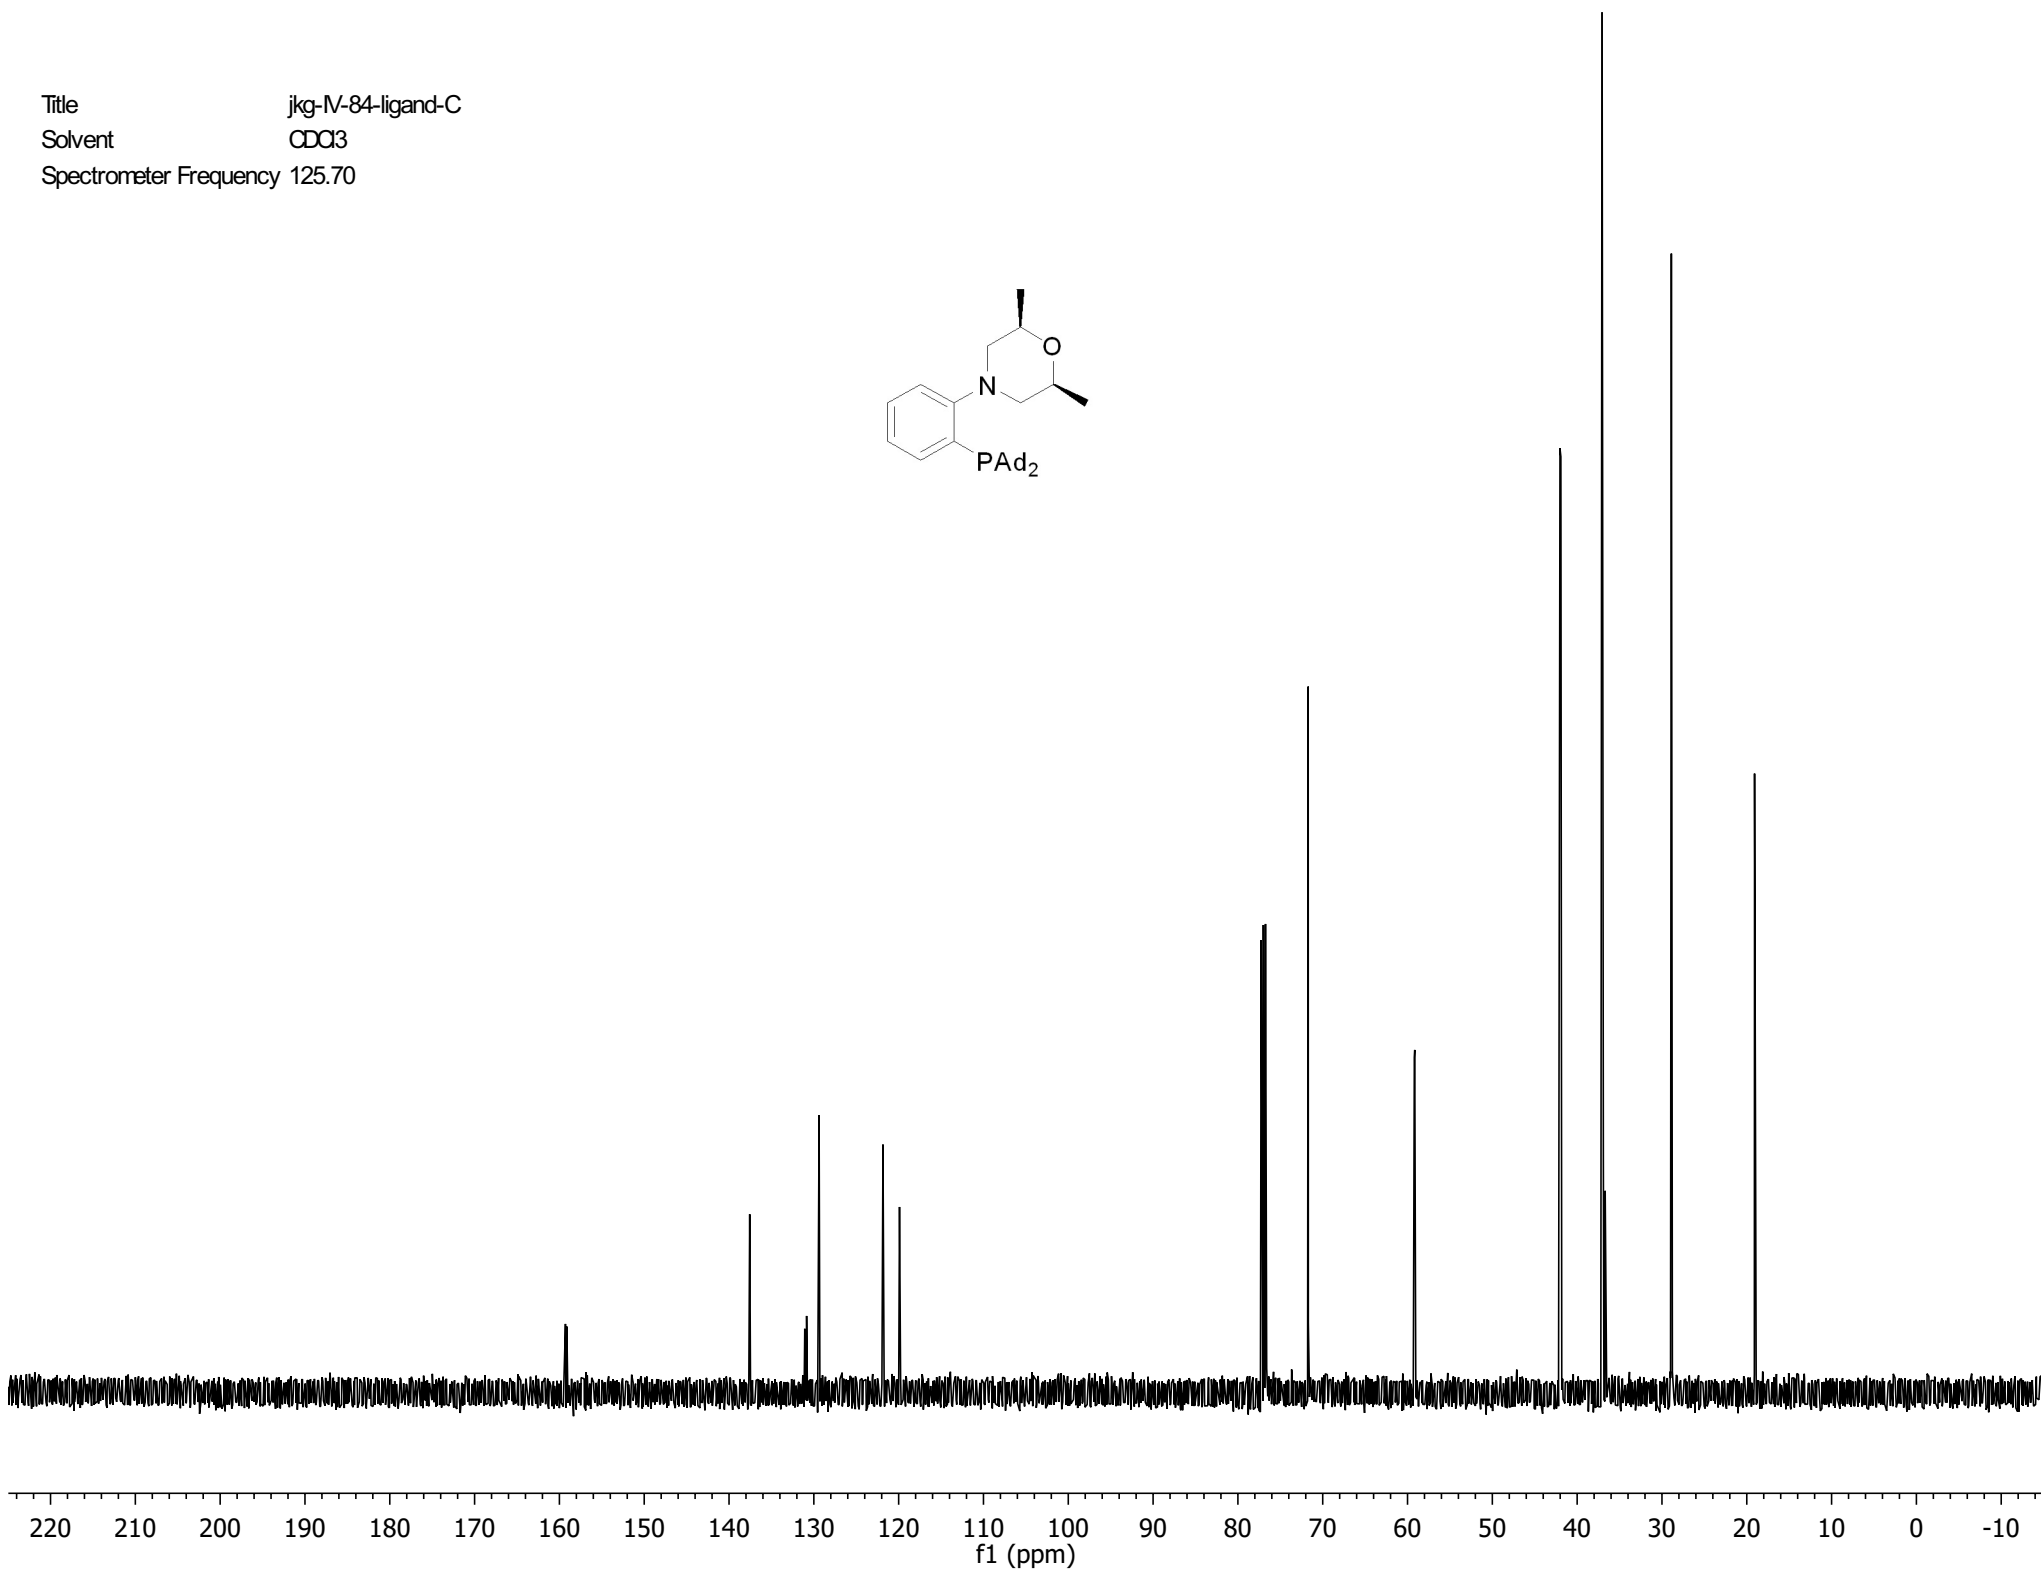

Title jkg-IV-84B-P31  
Solvent cdcl3  
Spectrometer Frequency 161.90

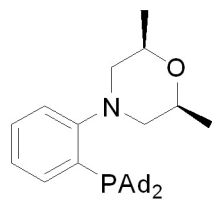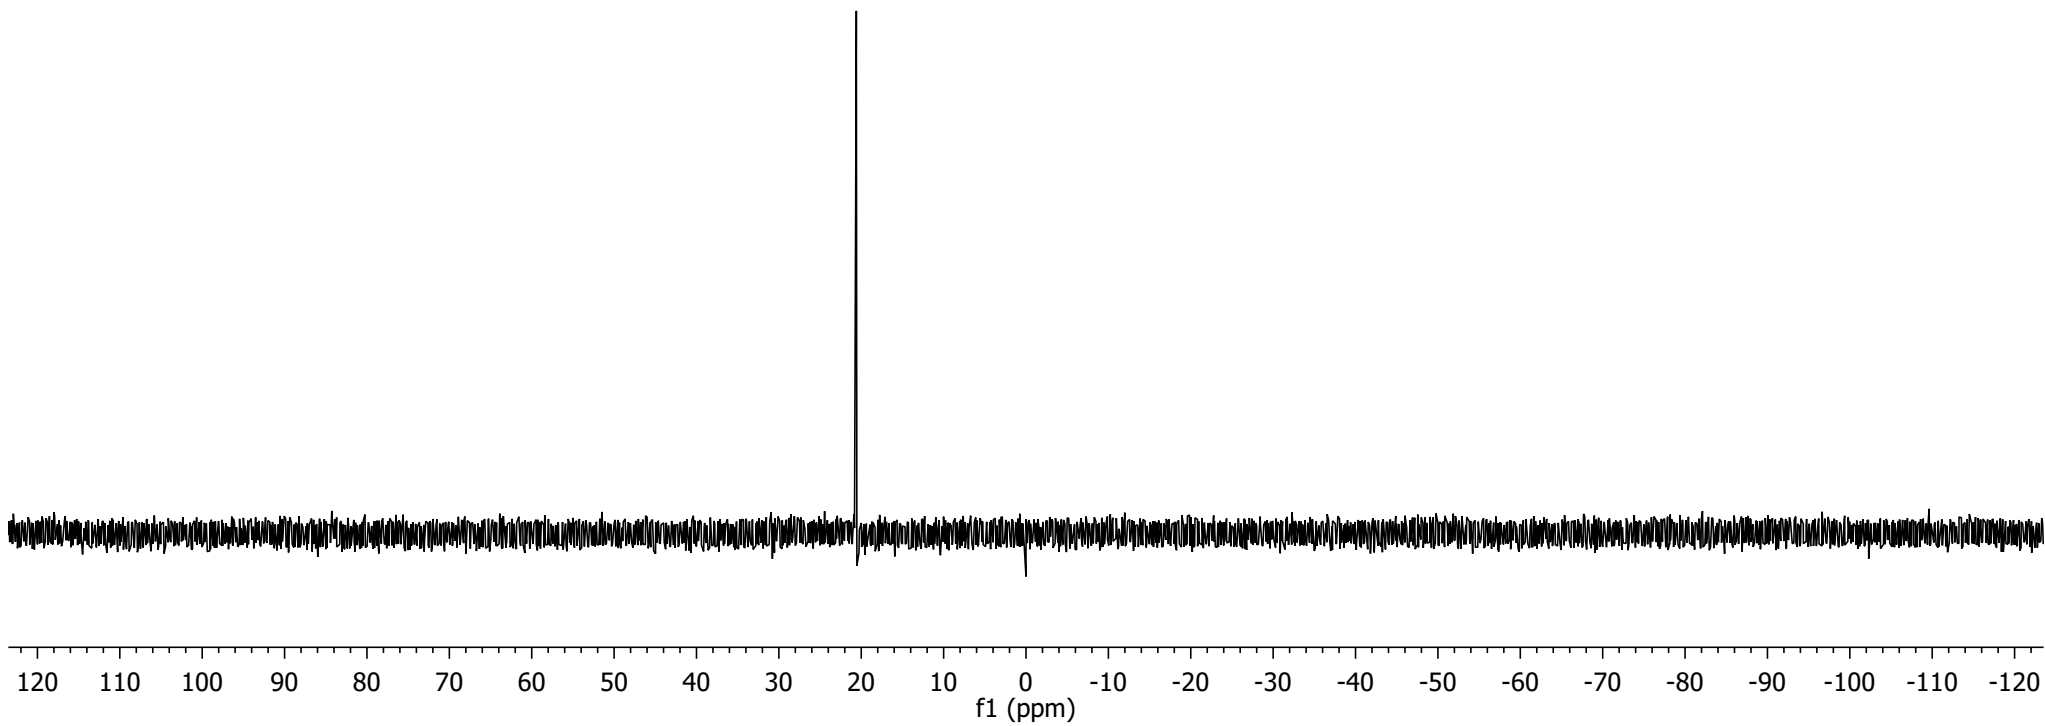

Title jkg-IV-85-LAuCl-H  
Solvent CDCl3  
Spectrometer Frequency 499.86

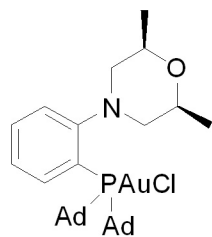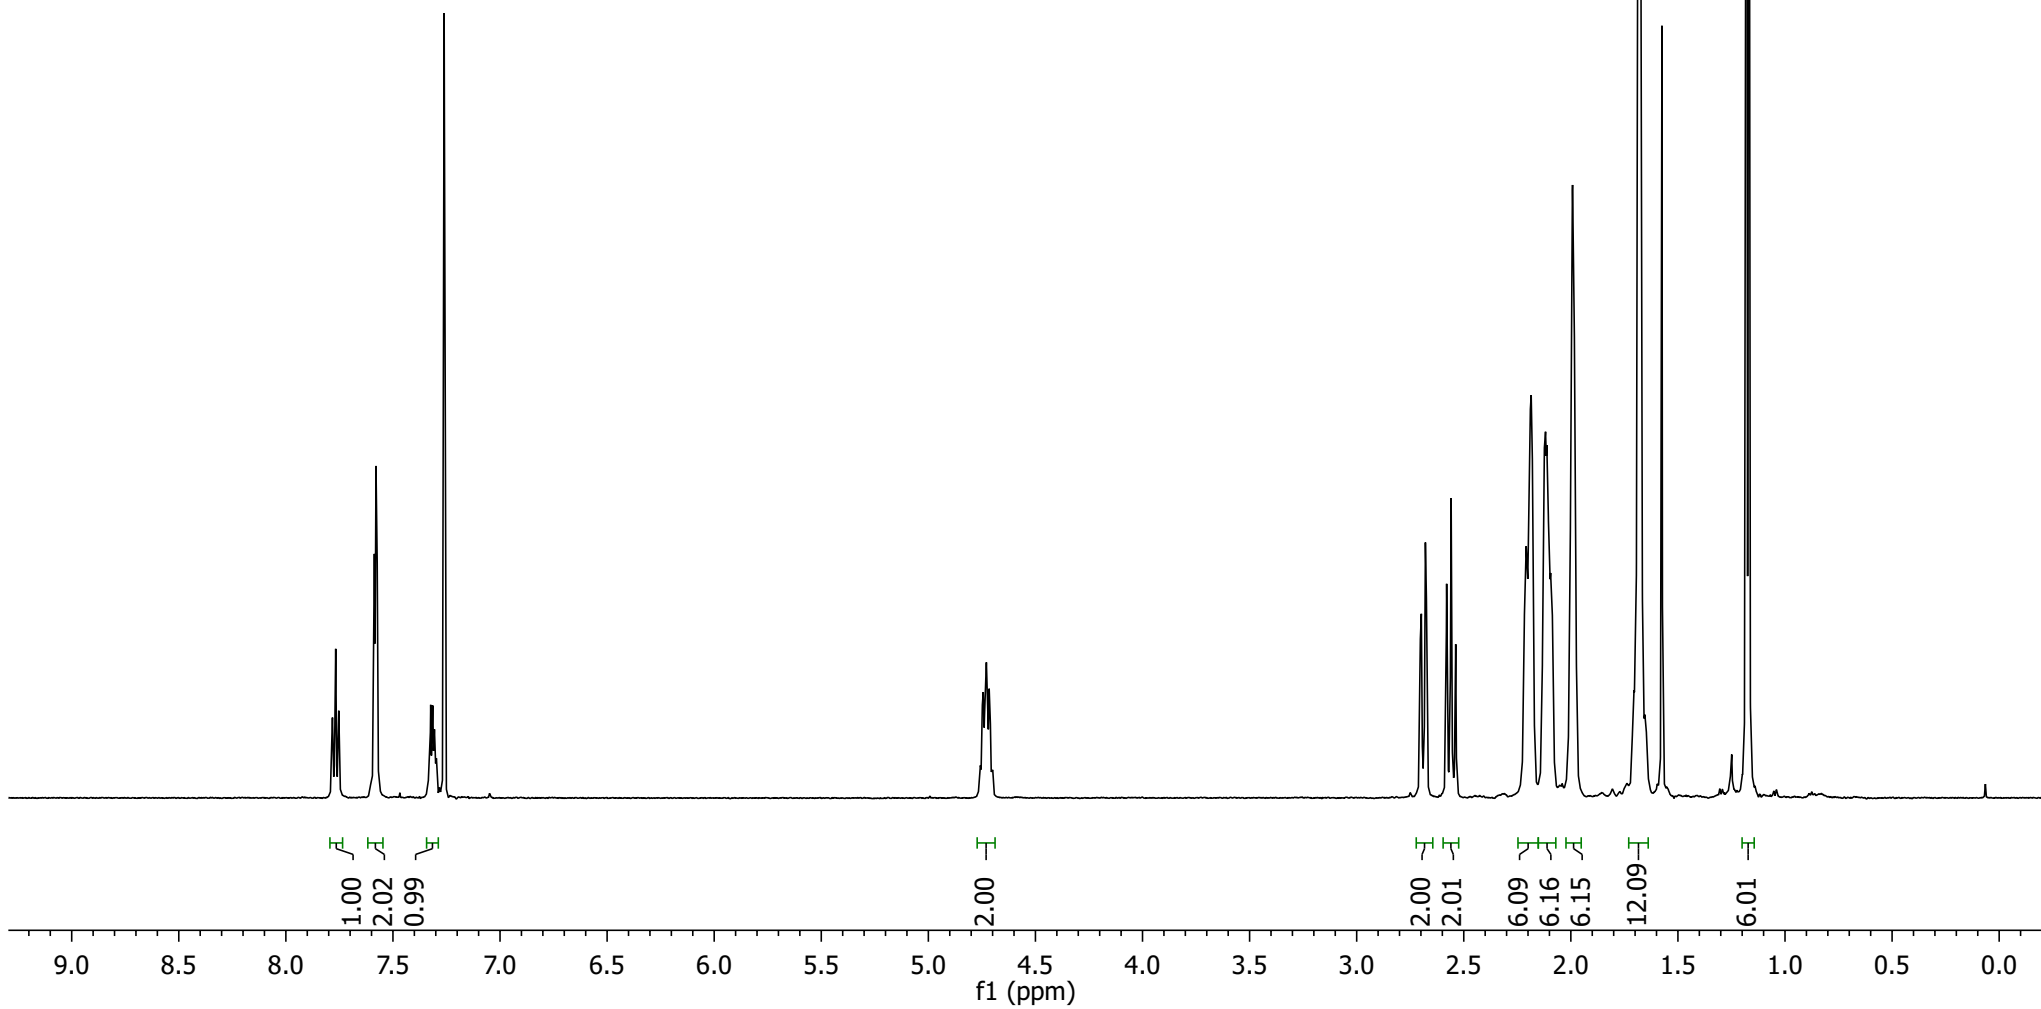

Title jkg-IV-85-LAuCl-C  
Solvent CDCl3  
Spectrometer Frequency 125.70

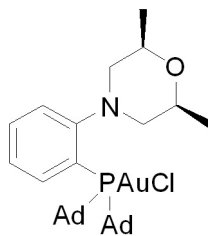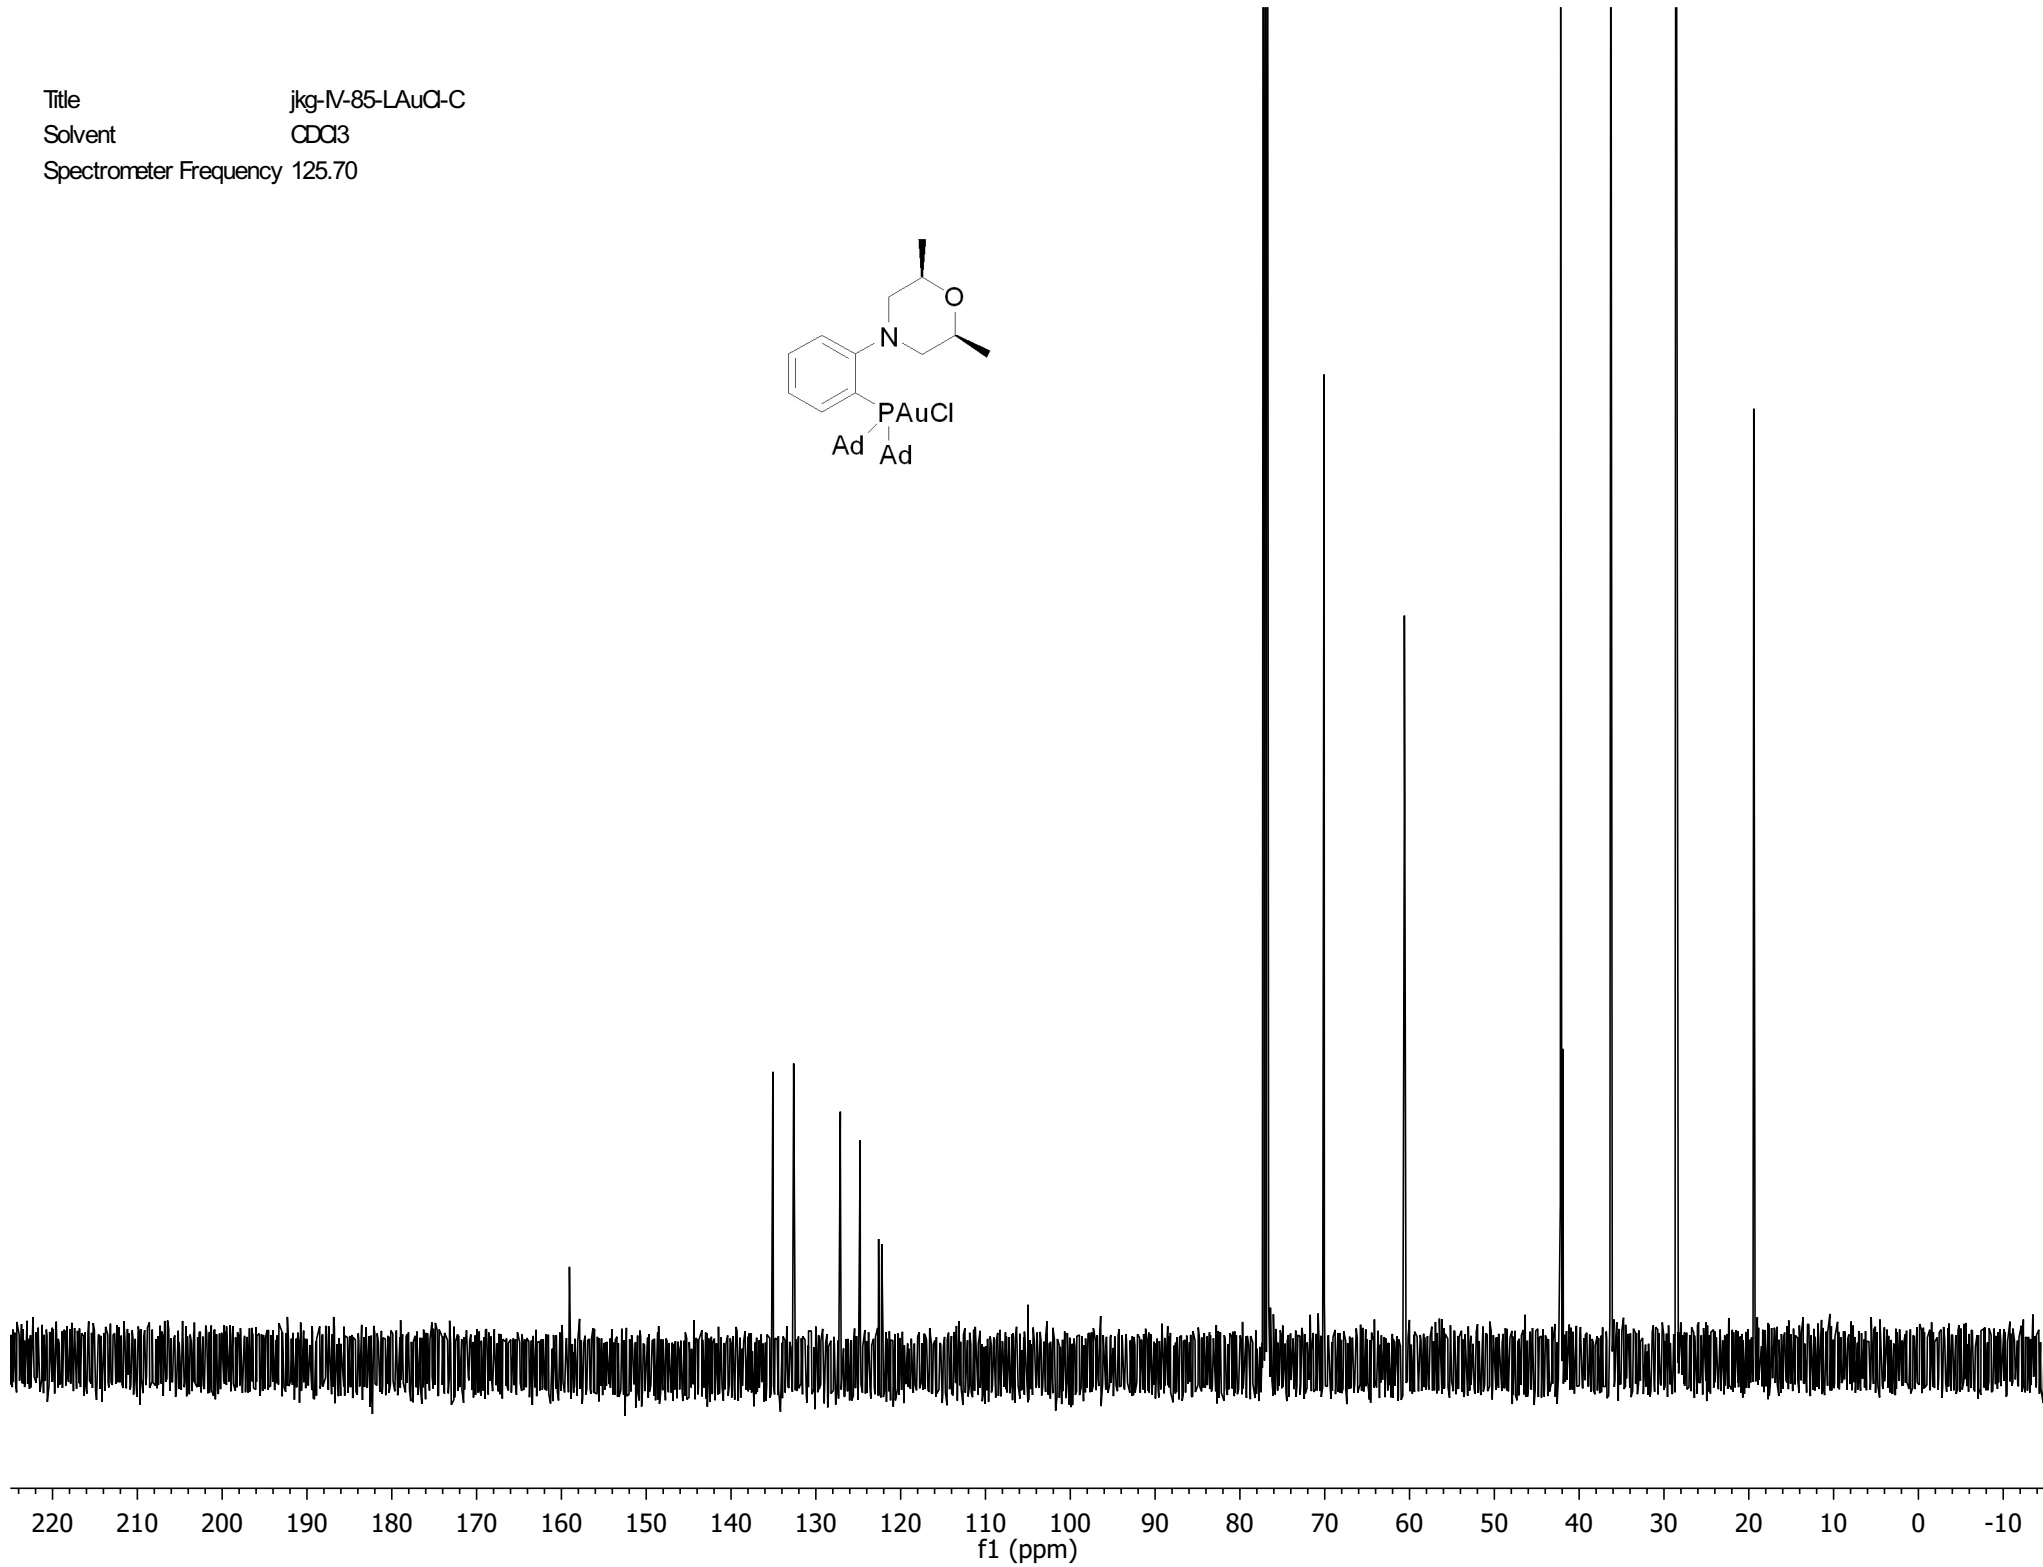

Title jkg-IV-85-P31  
Solvent cdcl3  
Spectrometer Frequency 161.90

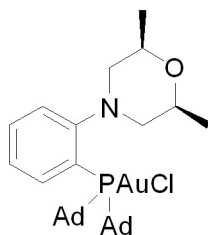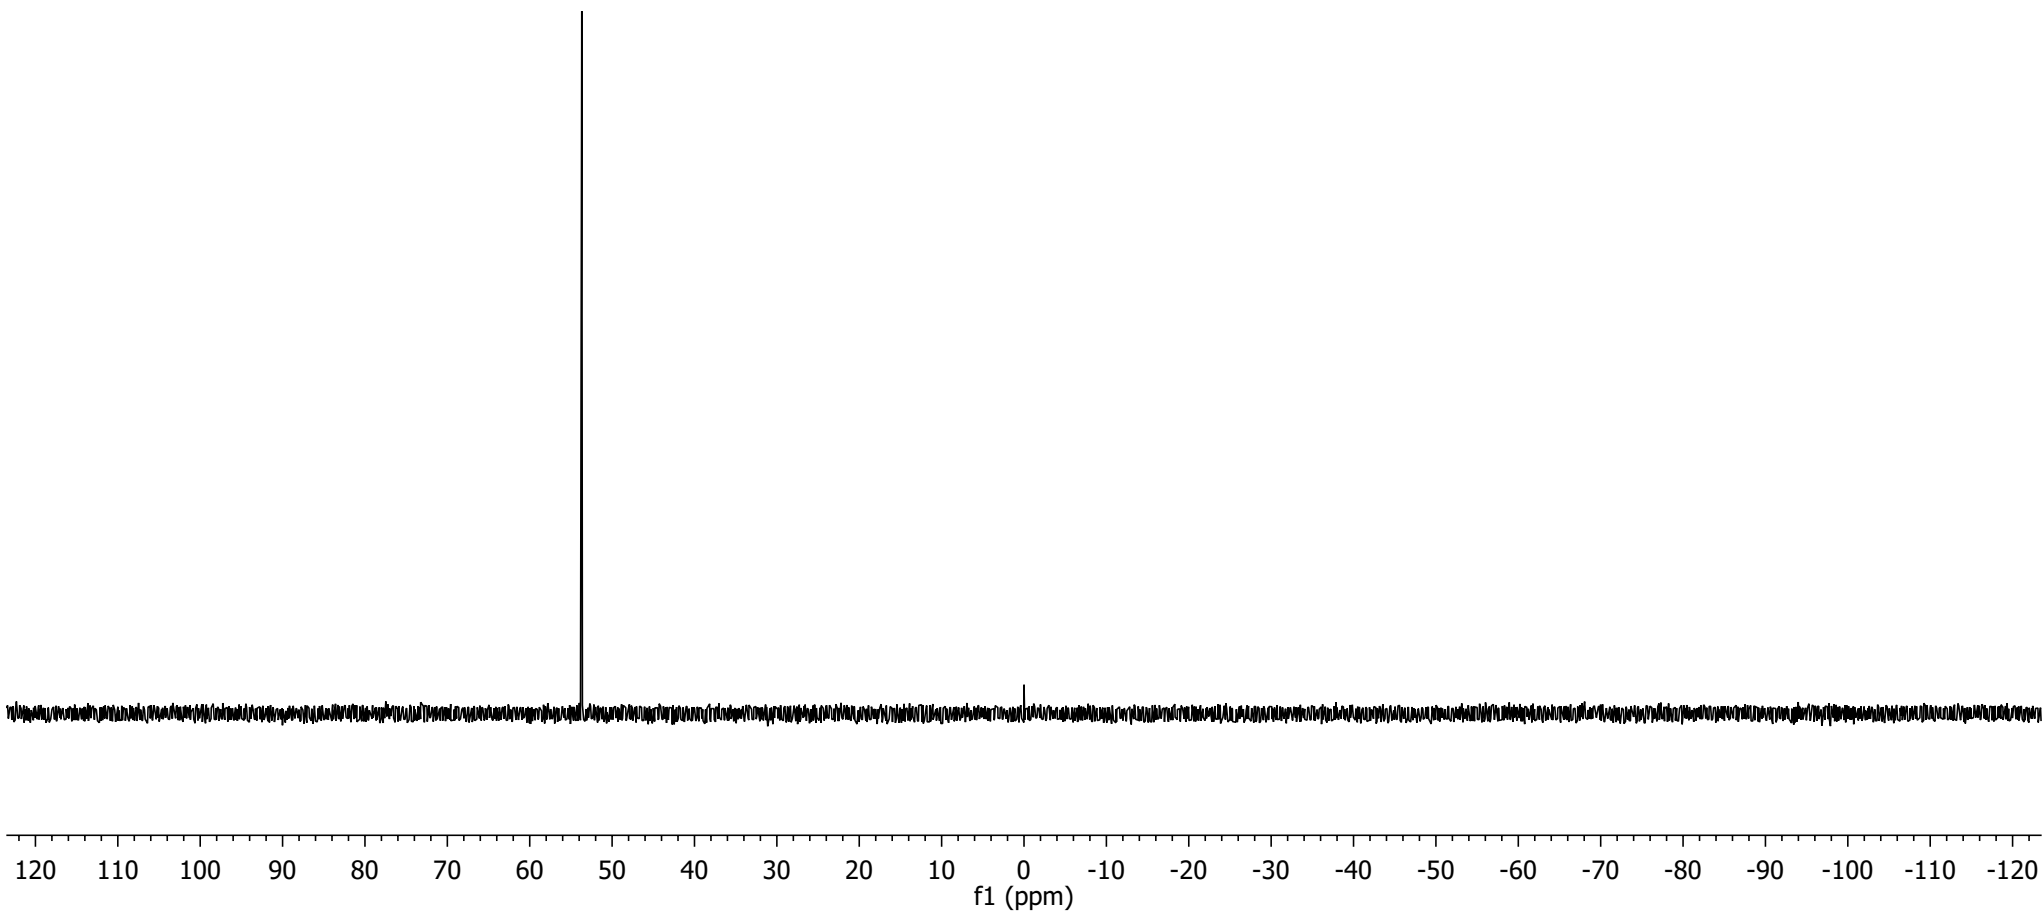

Title jkg-IV-108-ligand-H  
Solvent CDCl3  
Spectrometer Frequency 499.86

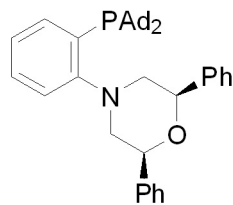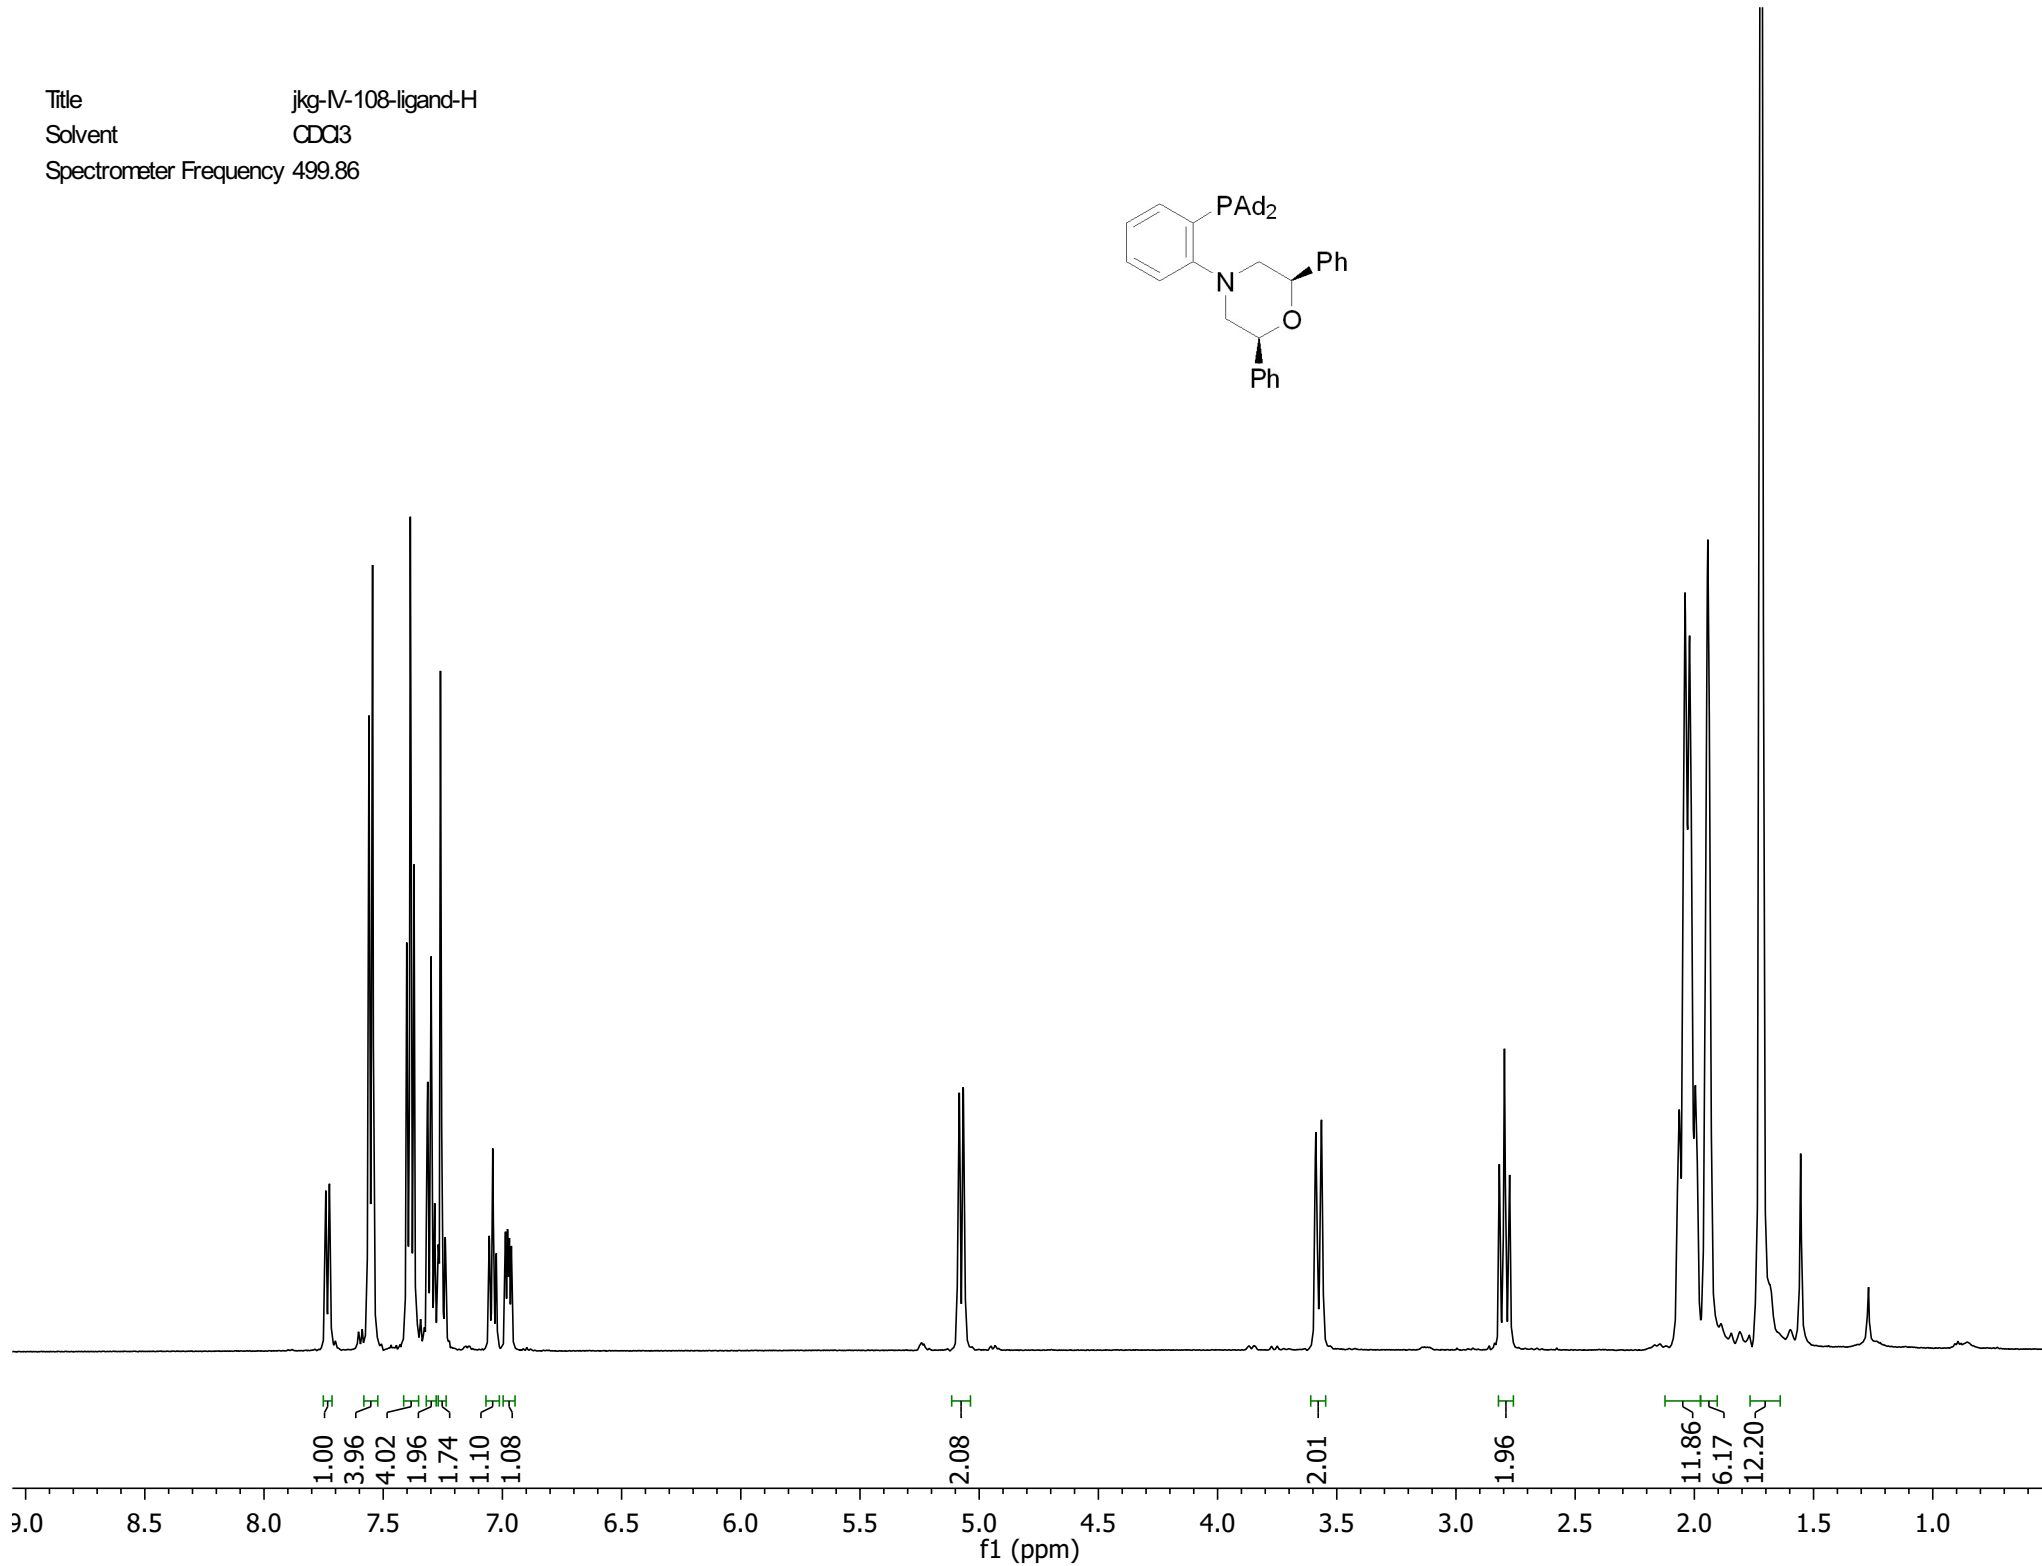



Title jkg-IV-108-ligand-C  
Solvent CDCl3  
Spectrometer Frequency 125.70

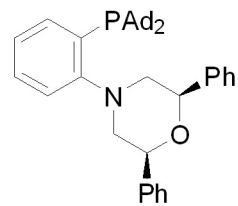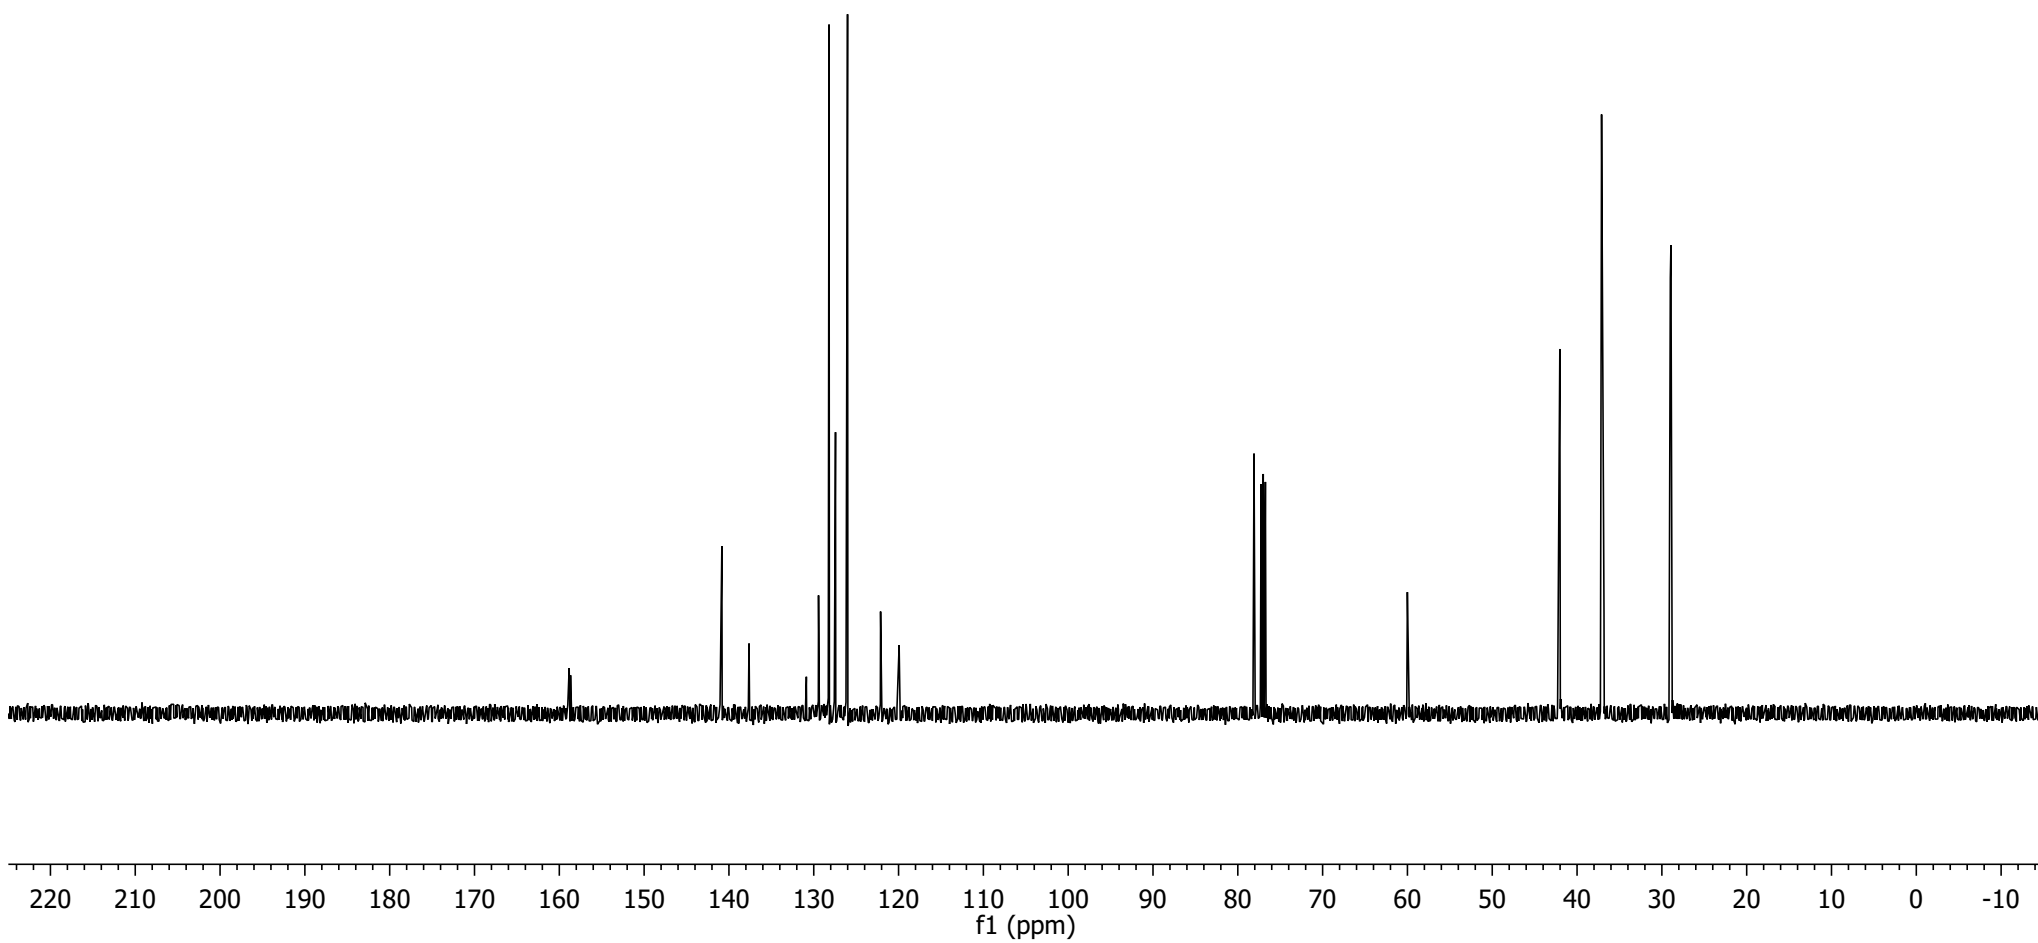

Title jkg-IV-108B-ligand-P31  
Solvent cdcl3  
Spectrometer Frequency 161.90

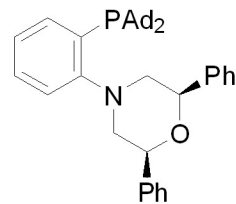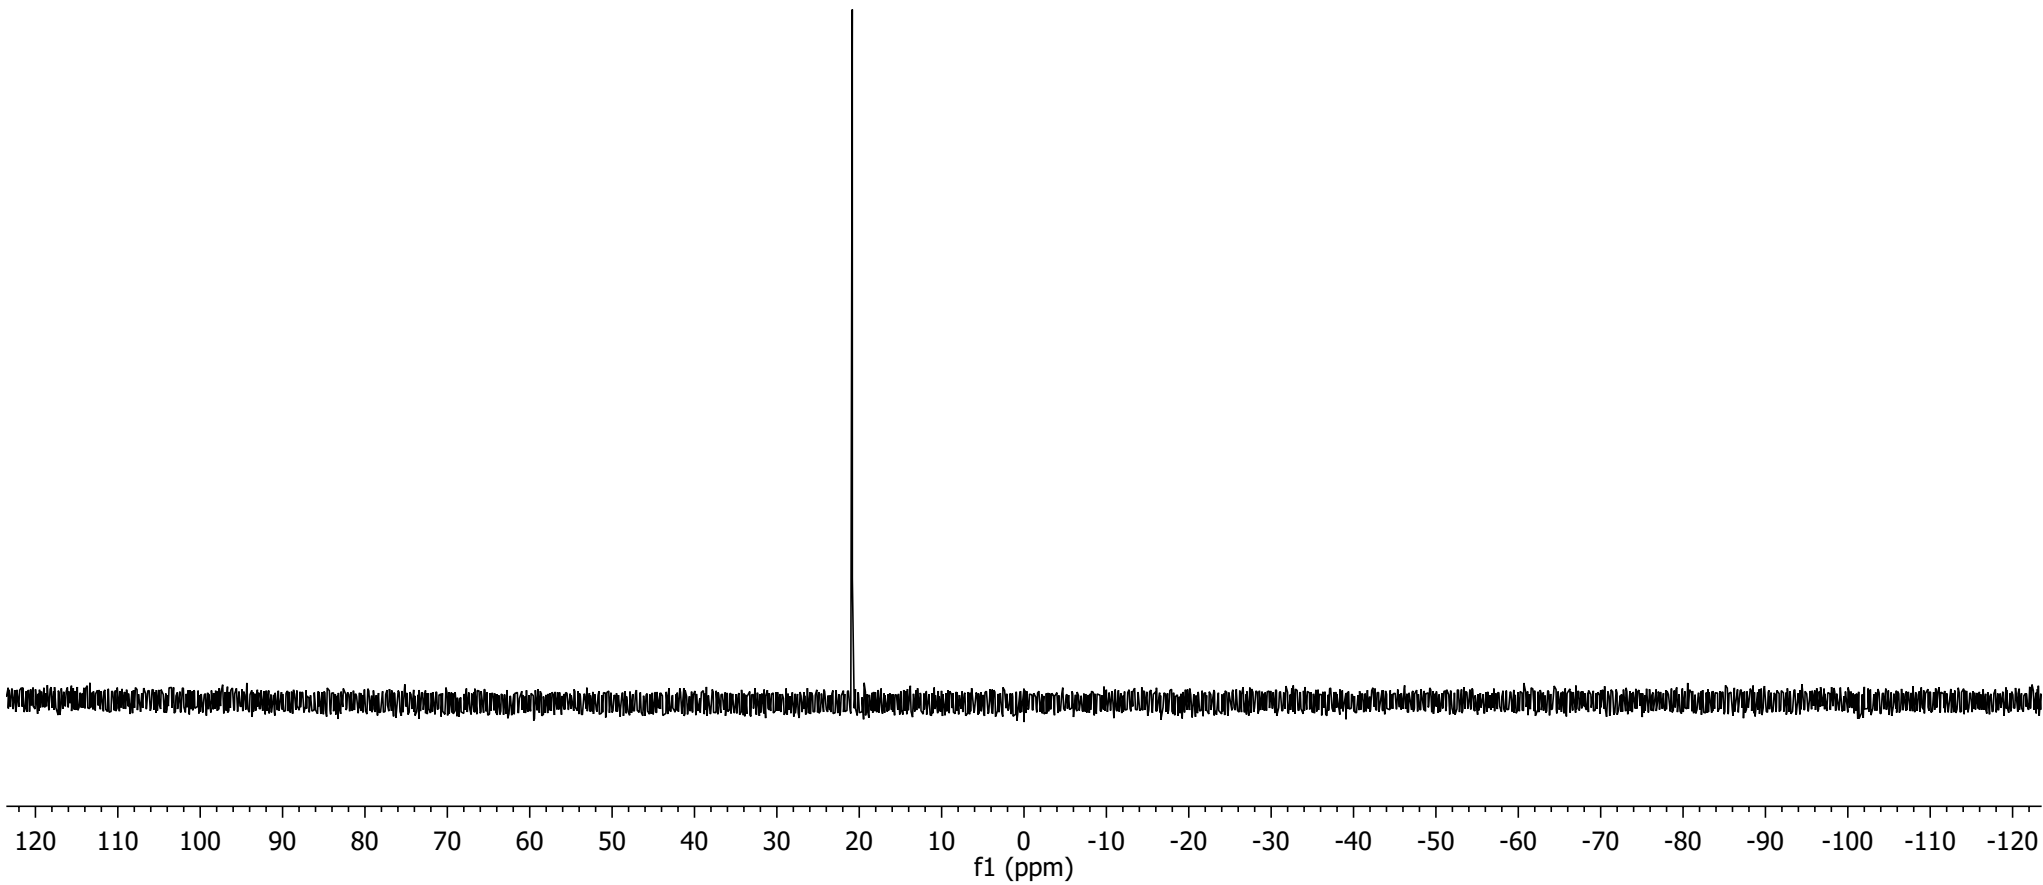

Title jkg-IV-110-LAuCl-H  
Solvent CDCl3  
Spectrometer Frequency 499.86

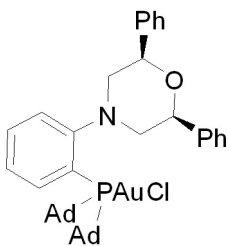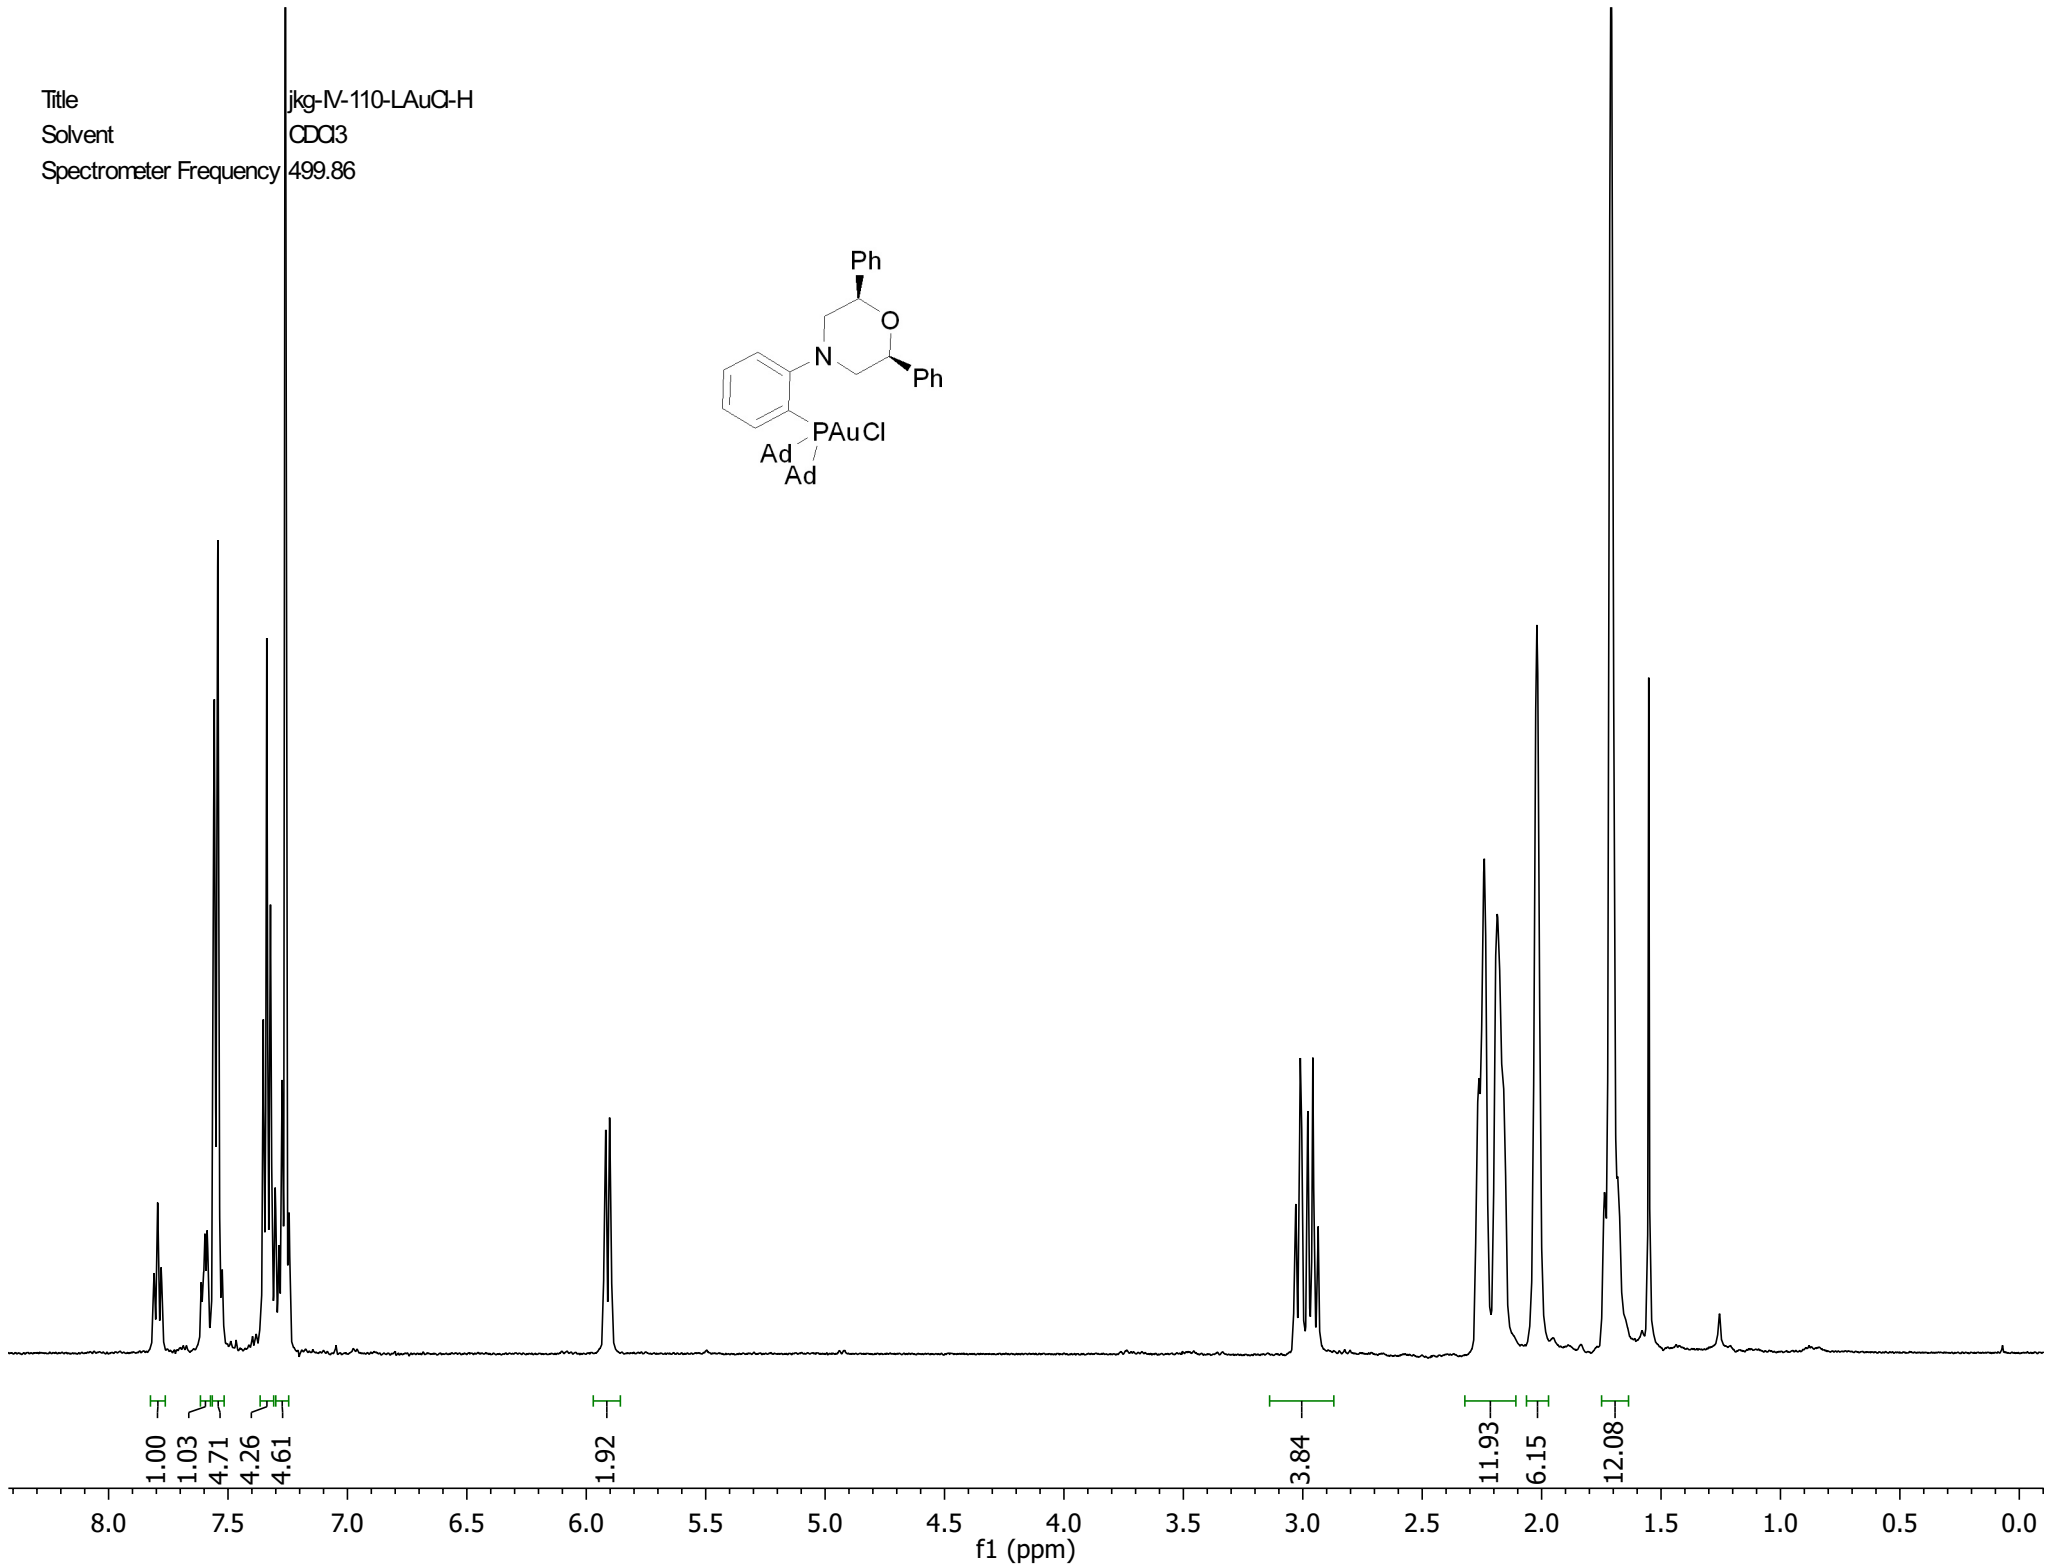

Title jkg-IV-110-LAuCl-C  
Solvent CDCl3  
Spectrometer Frequency 125.70

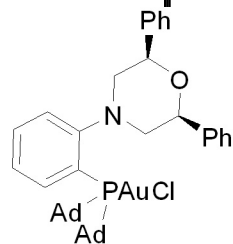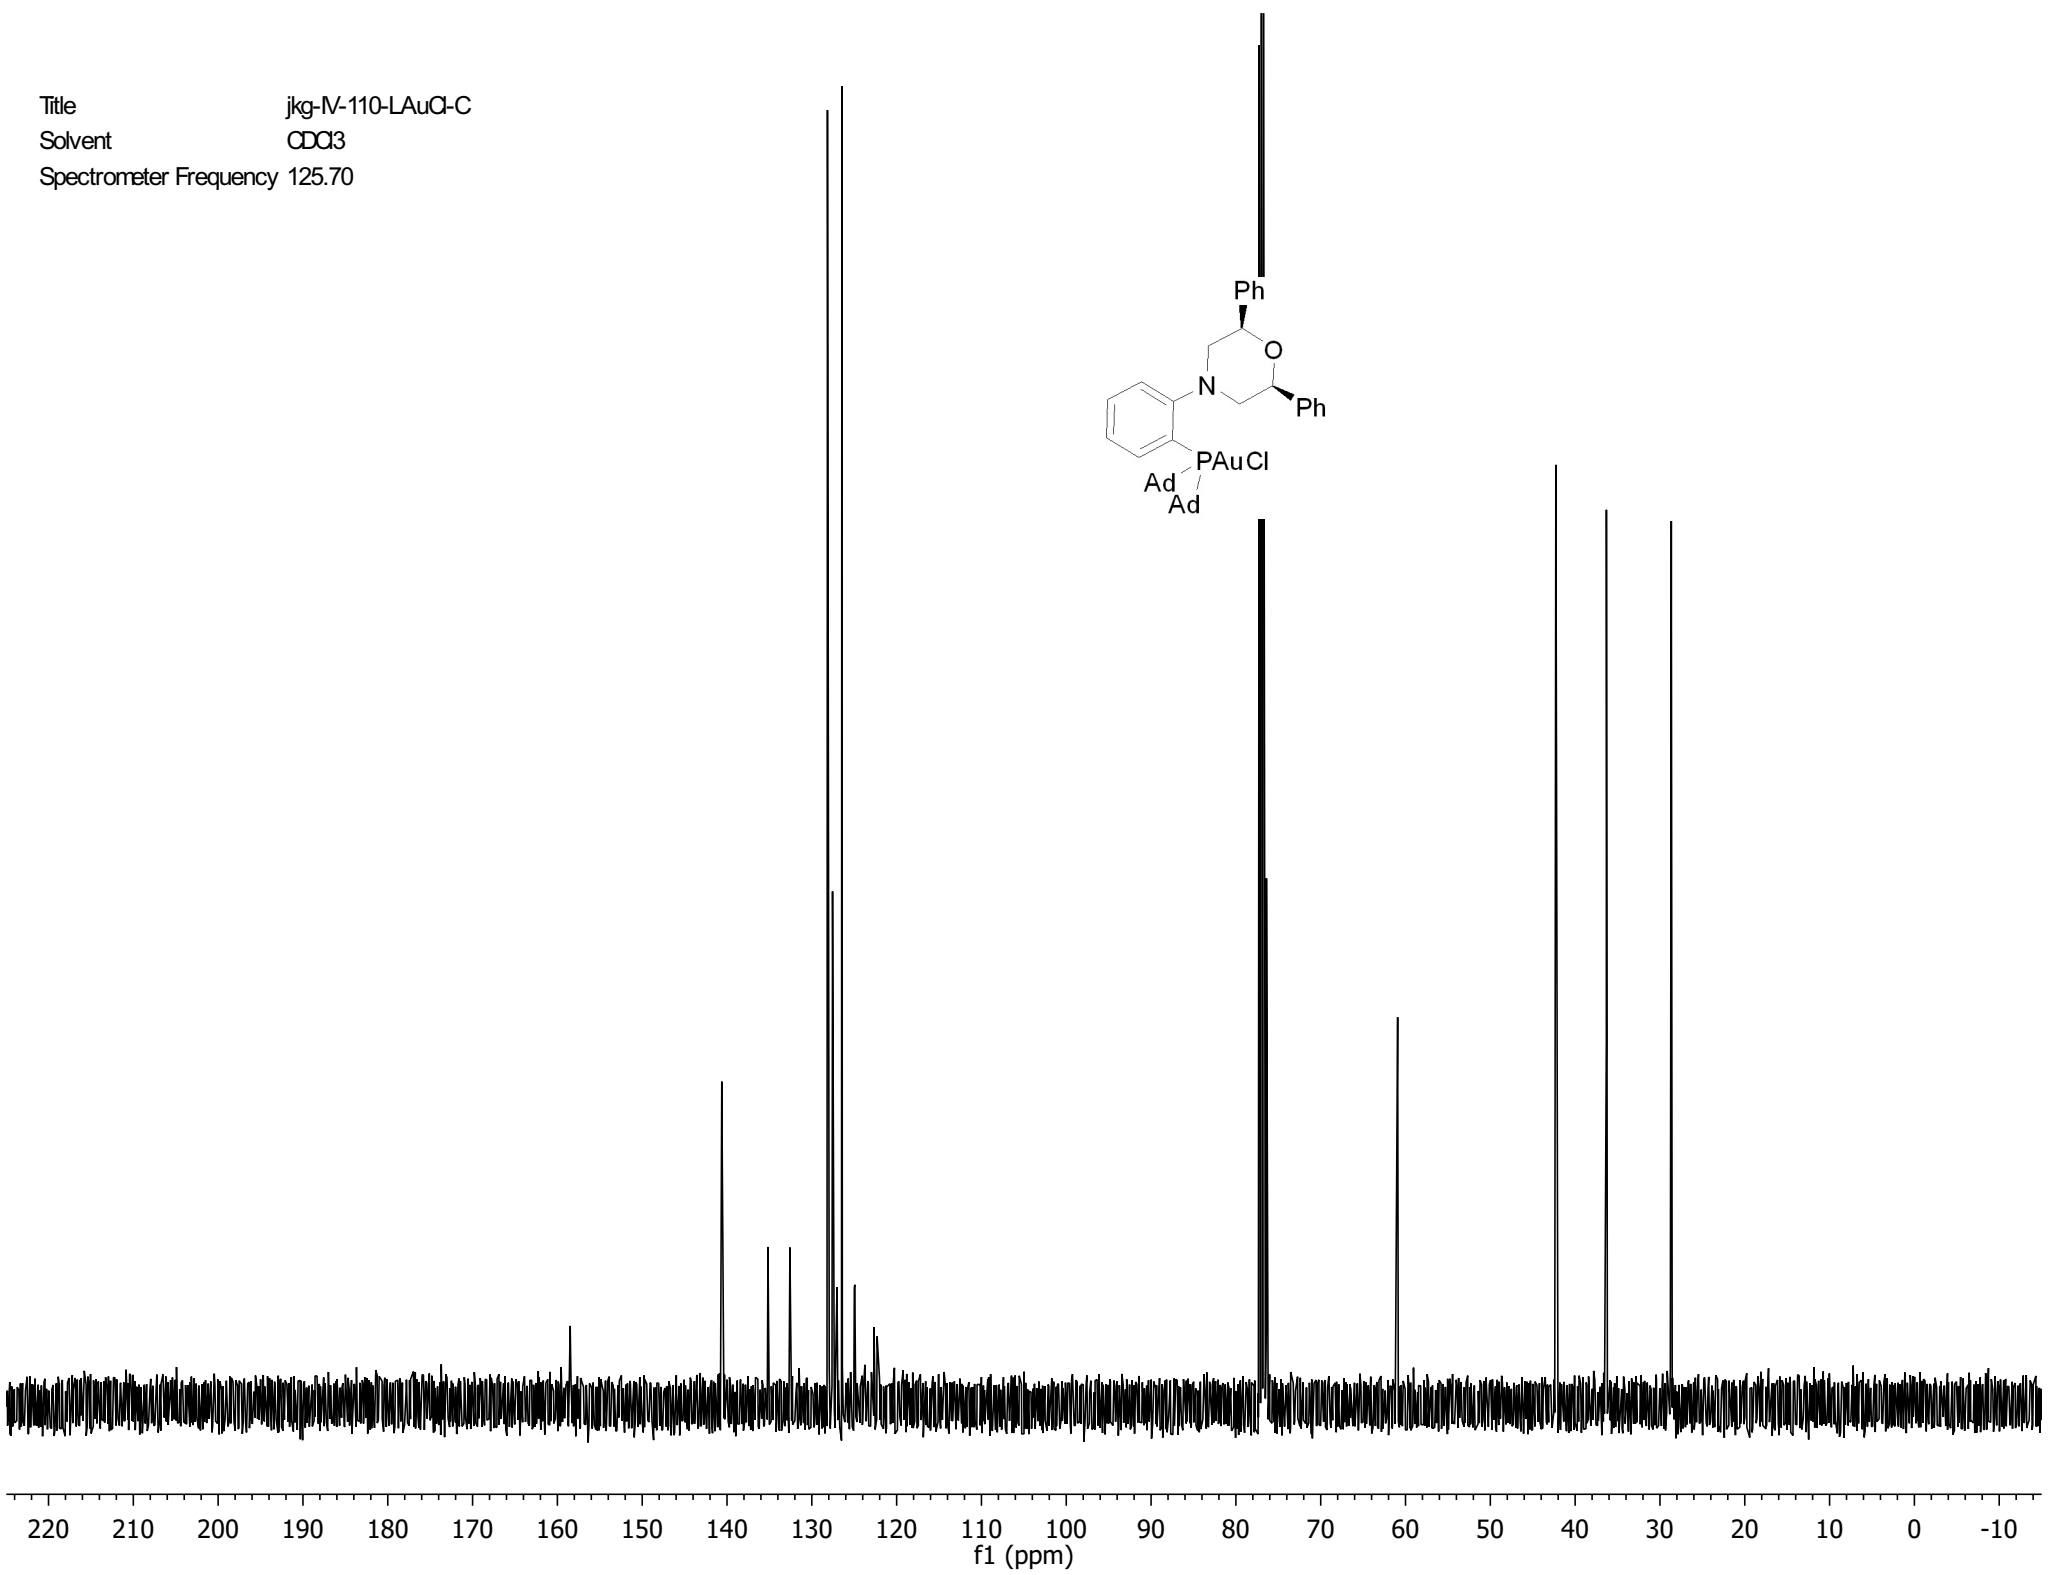

Title jkg-IV-110A-LAuCl-P31  
Solvent cdcl3  
Spectrometer Frequency 161.90

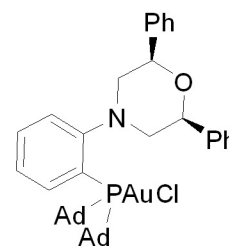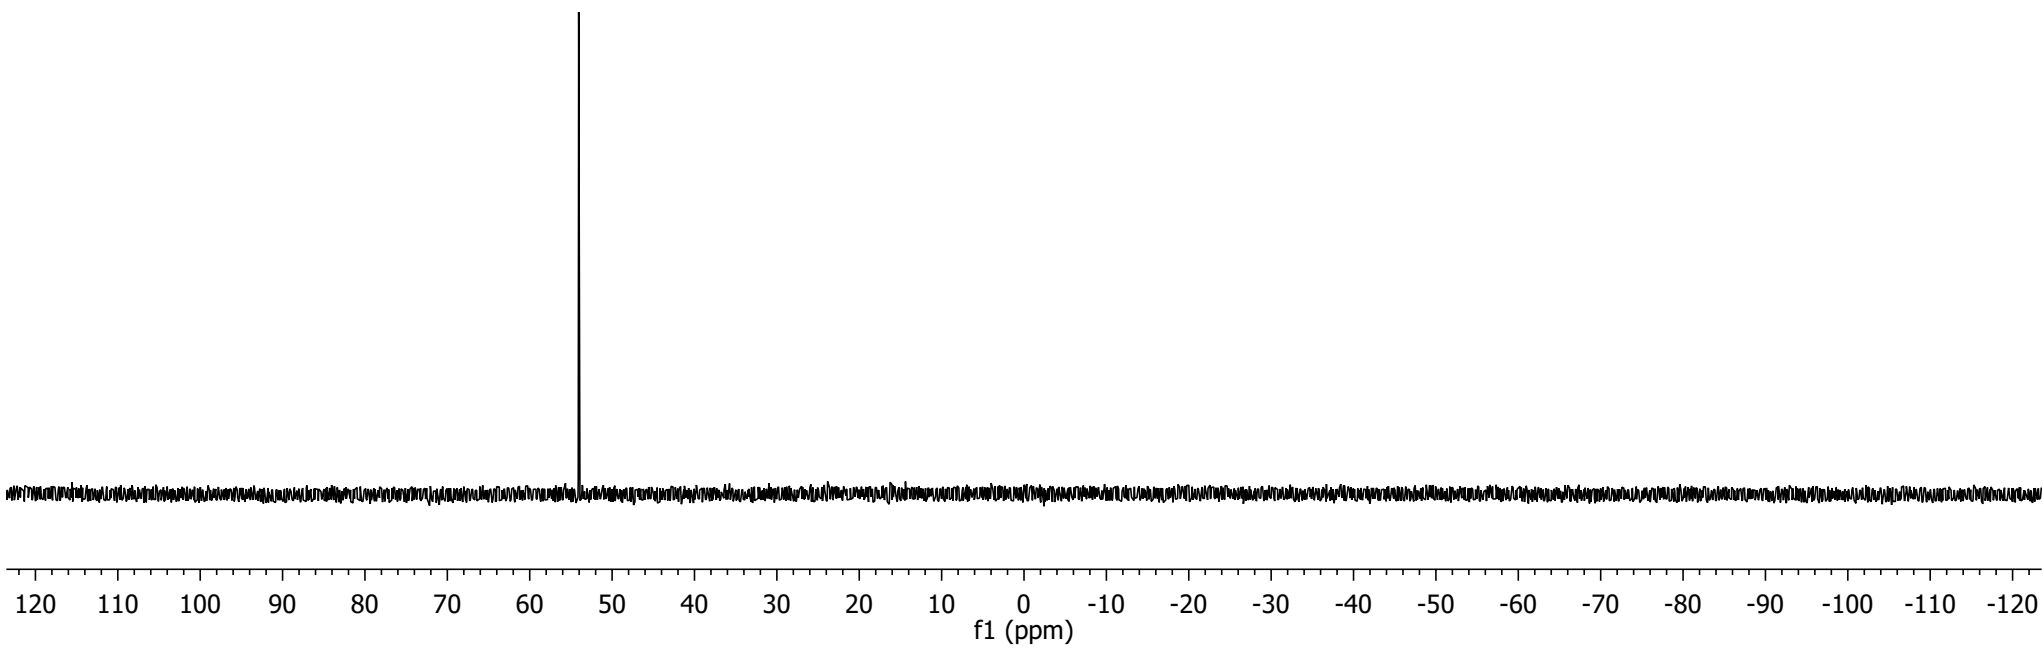

Title jkg-V-54-ligand-H  
Solvent CDCl3  
Spectrometer Frequency 499.86

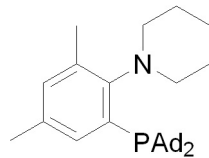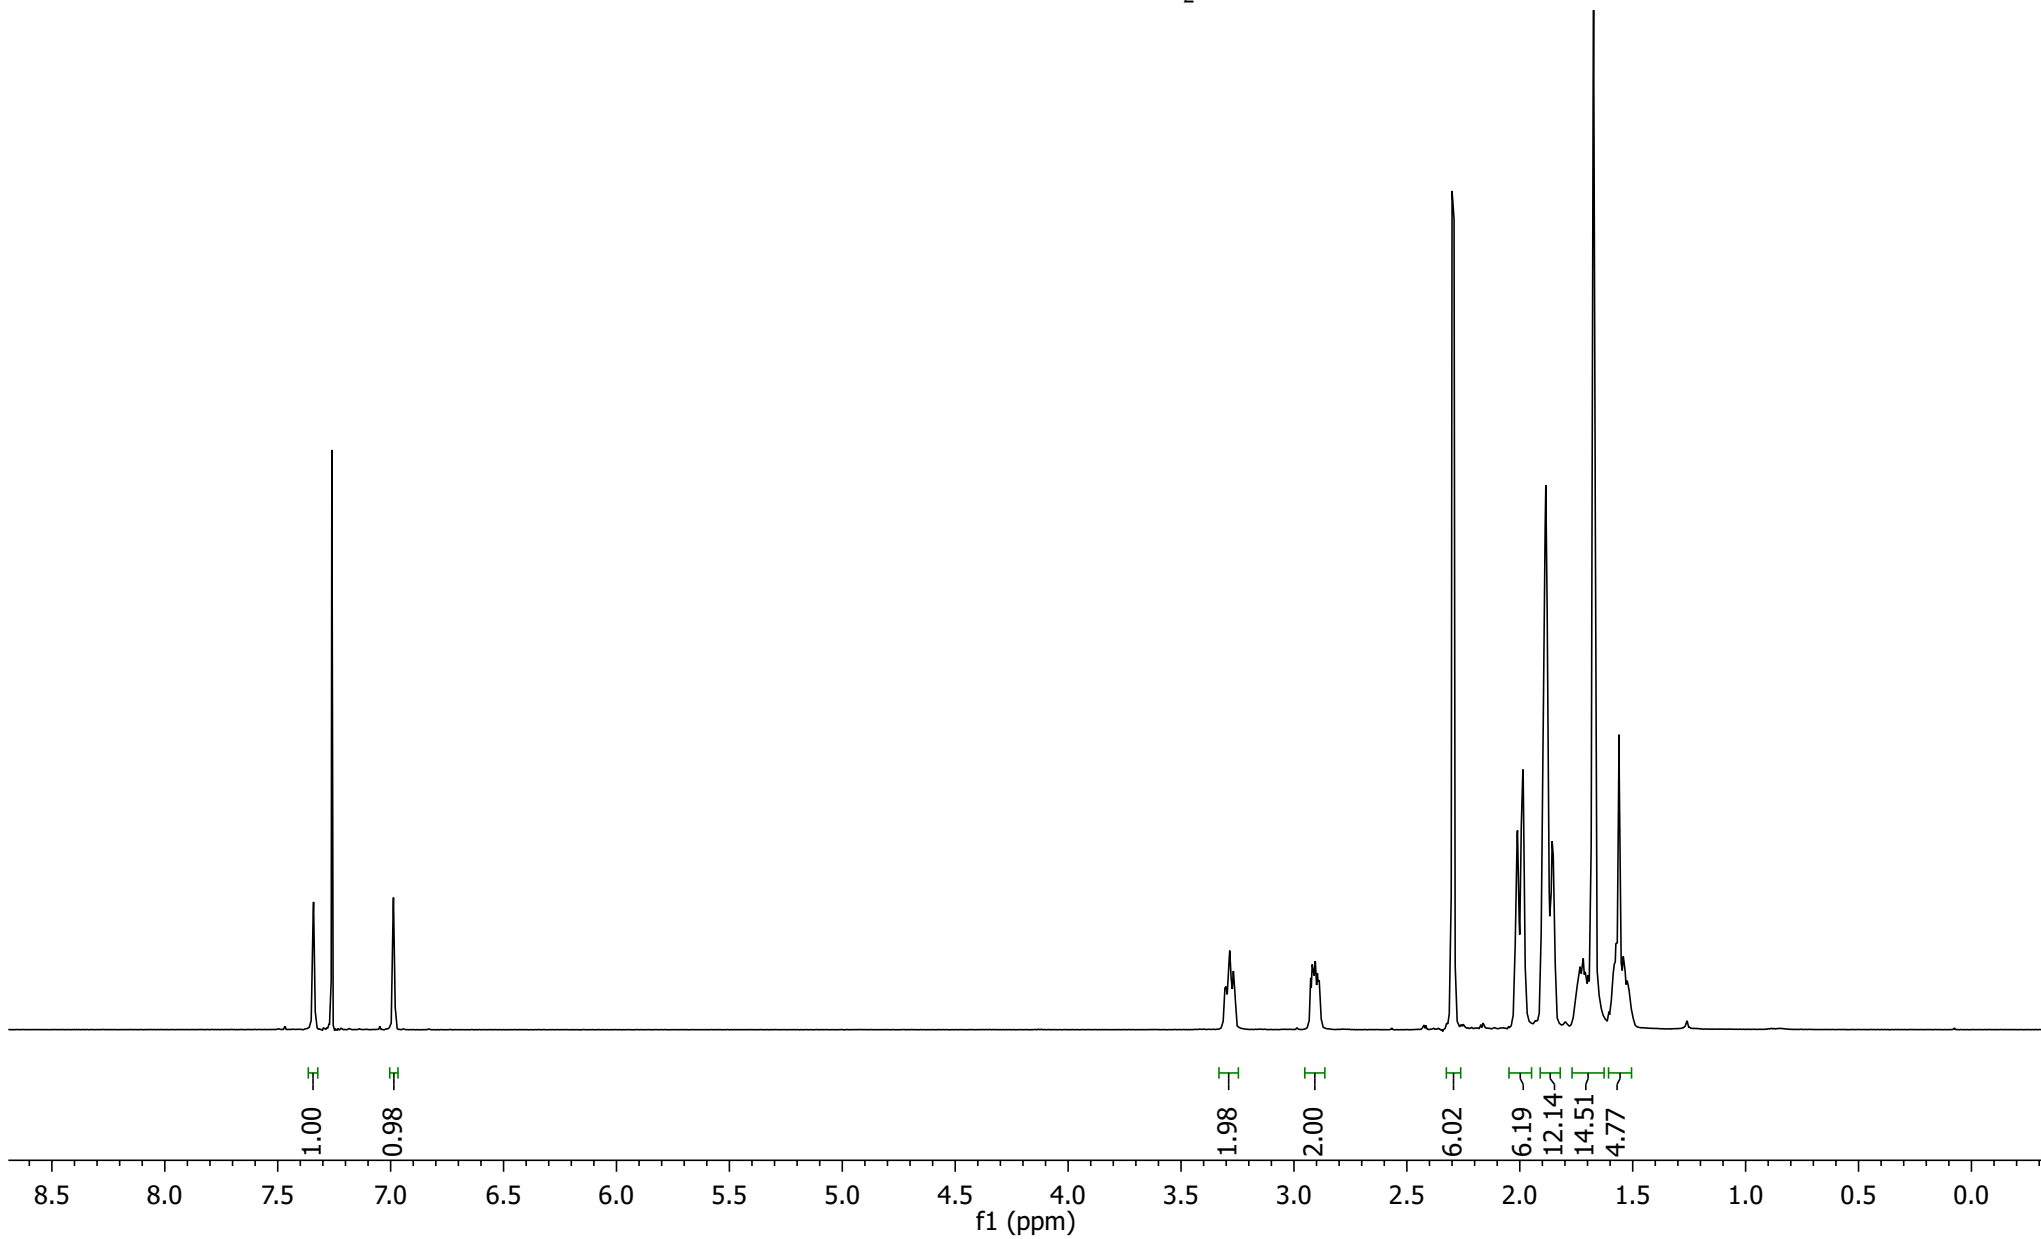

Title jkg-V-54-ligand-C  
Solvent CDCl3  
Spectrometer Frequency 125.70

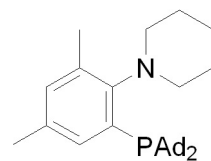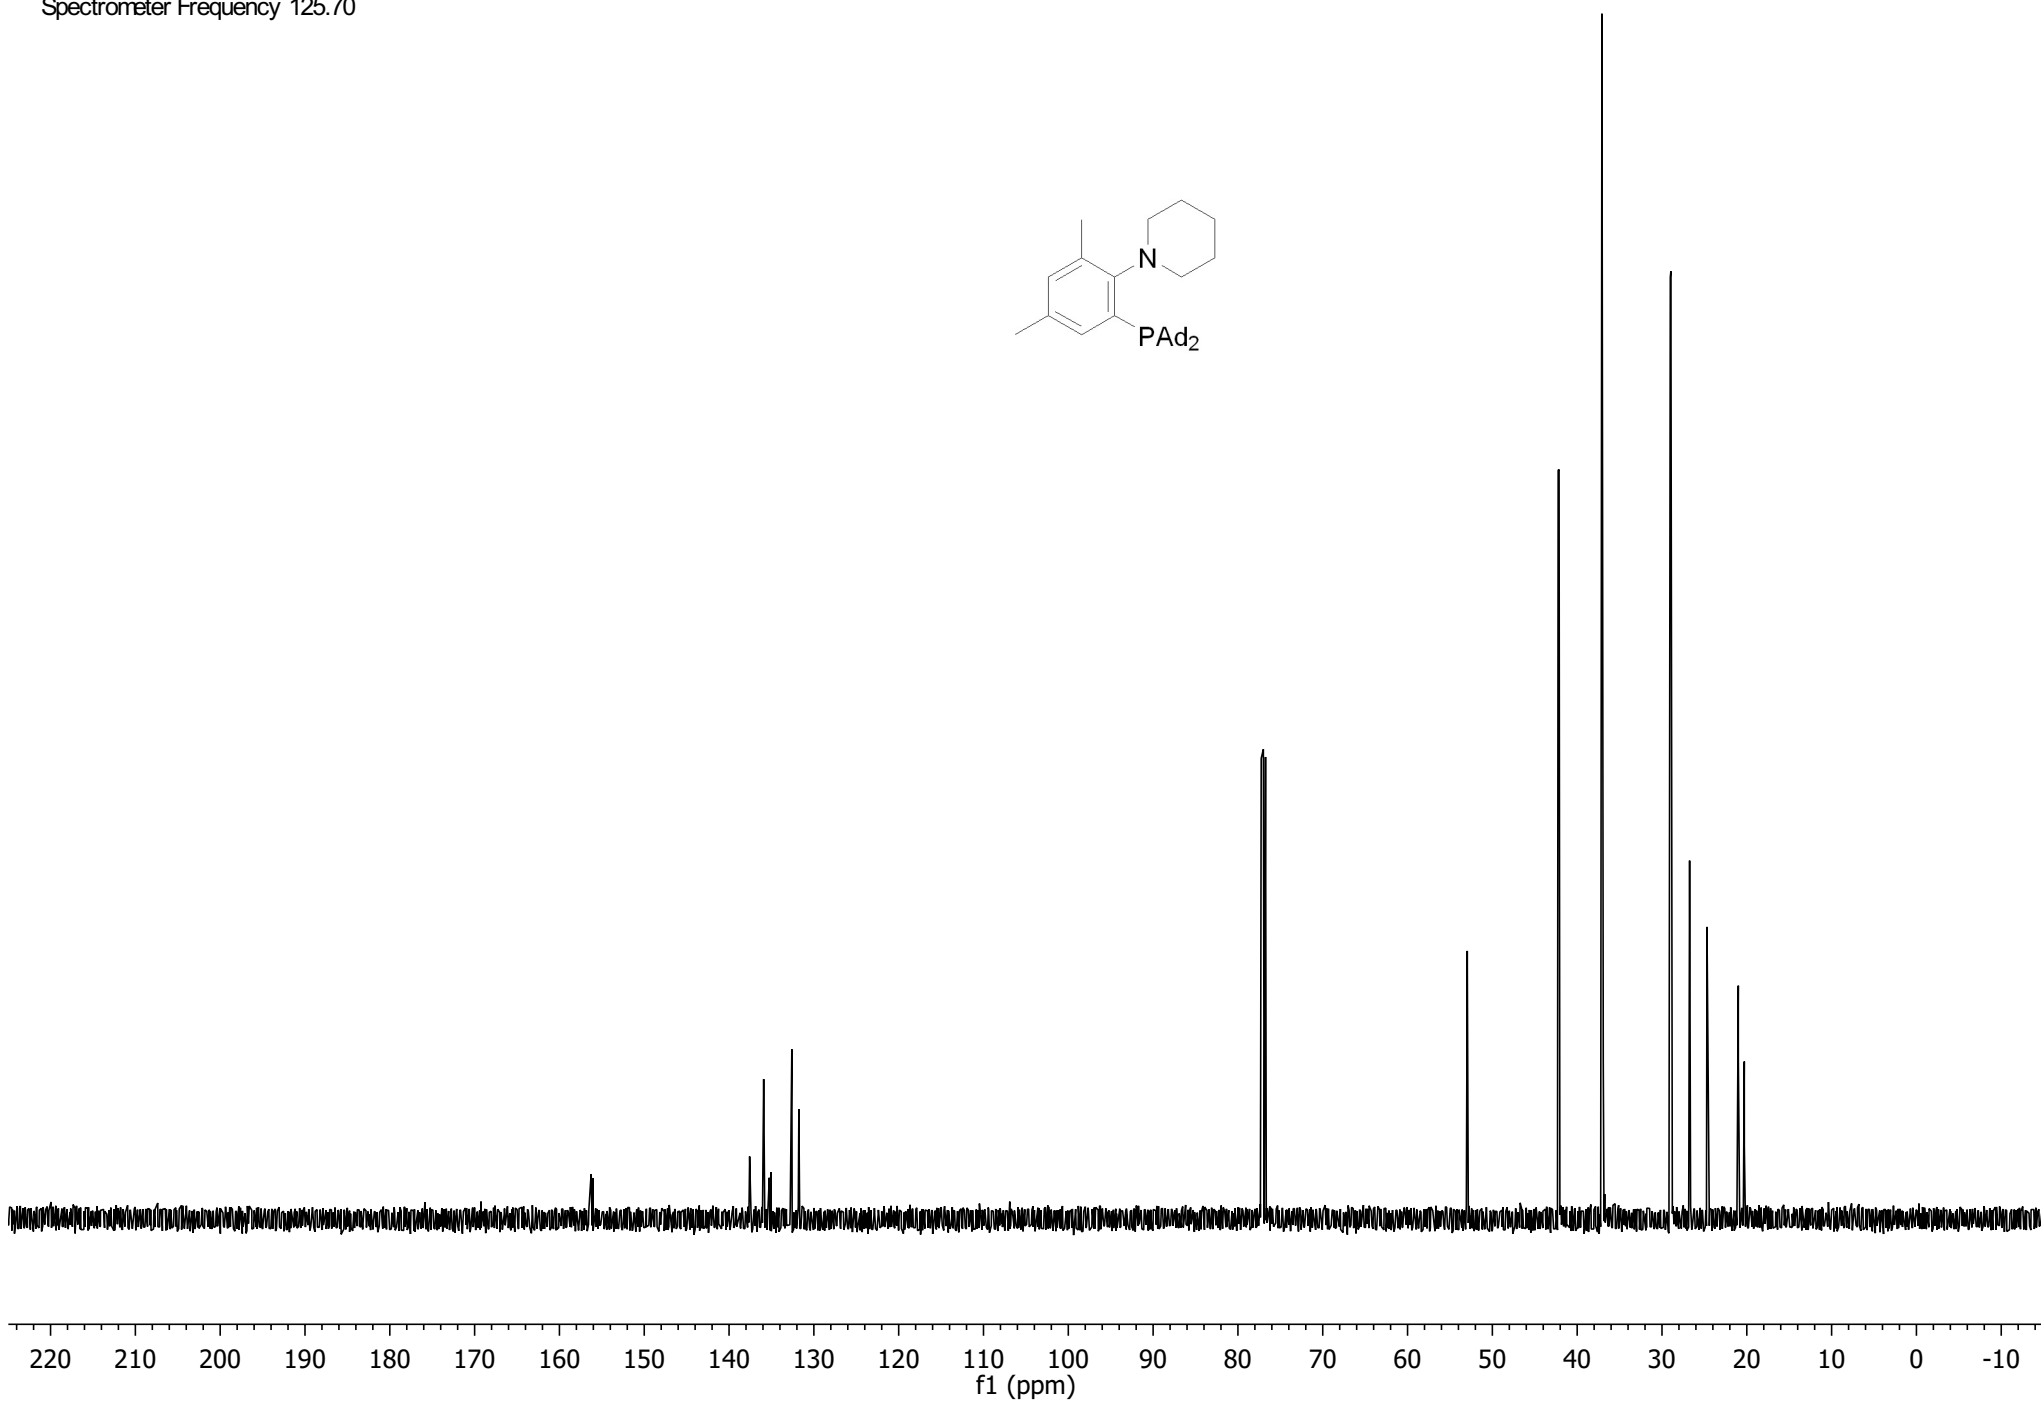

Title jkg-V-54-ligand-P31  
Solvent cdcl3  
Spectrometer Frequency 161.90

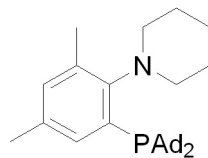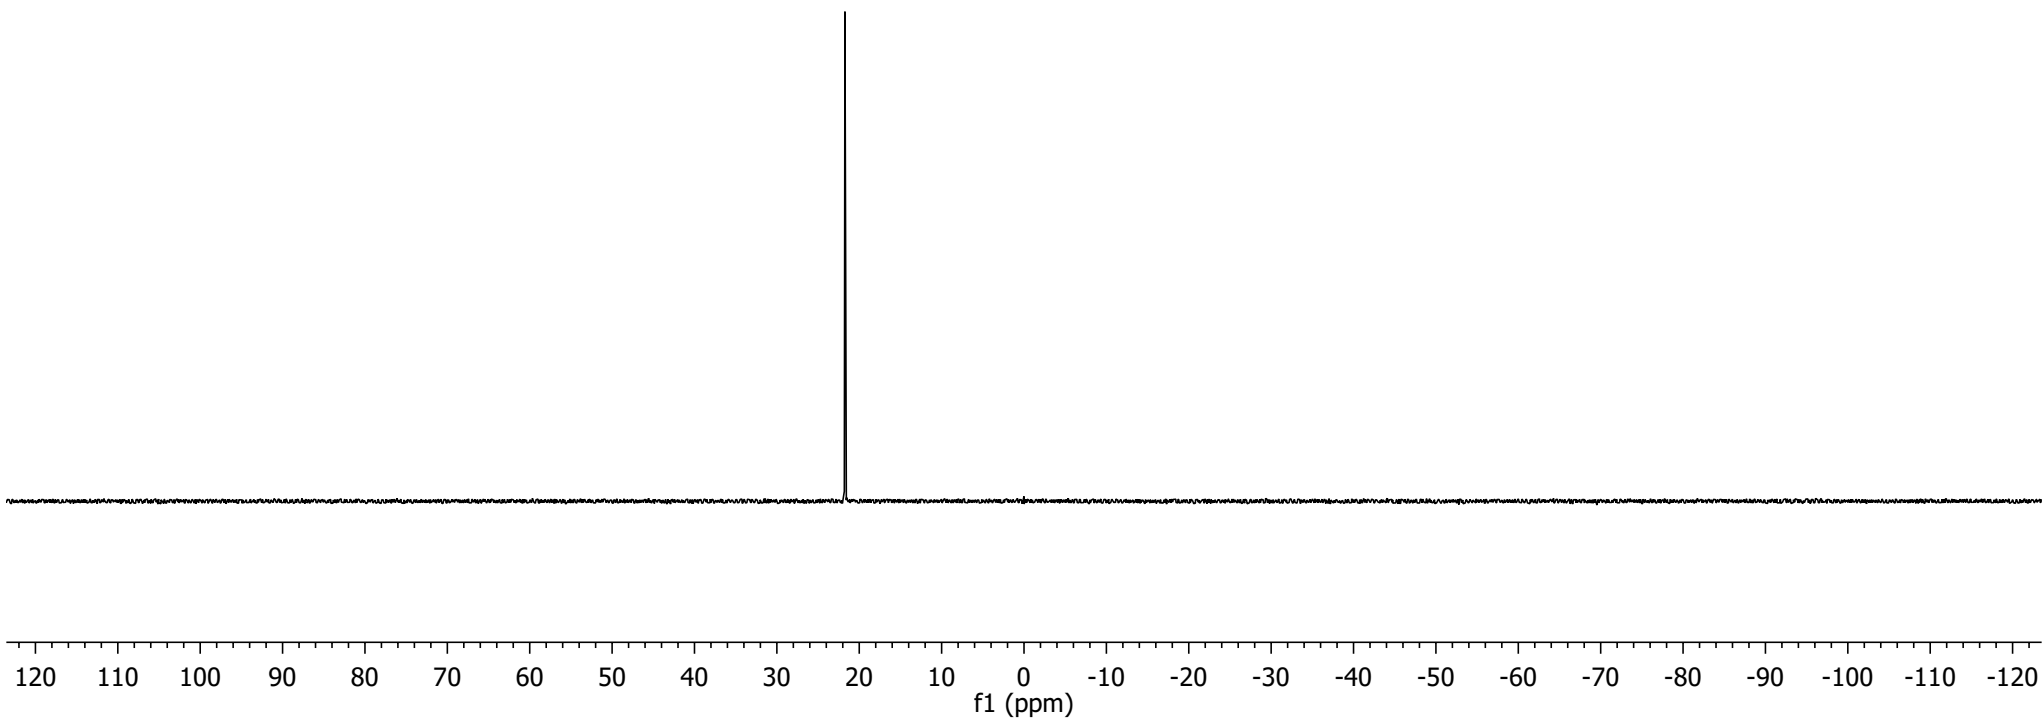



Title kg-V-54B-LAuCl-H  
Solvent CDCl3  
Spectrometer Frequency 499.86

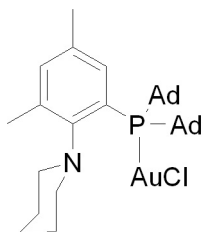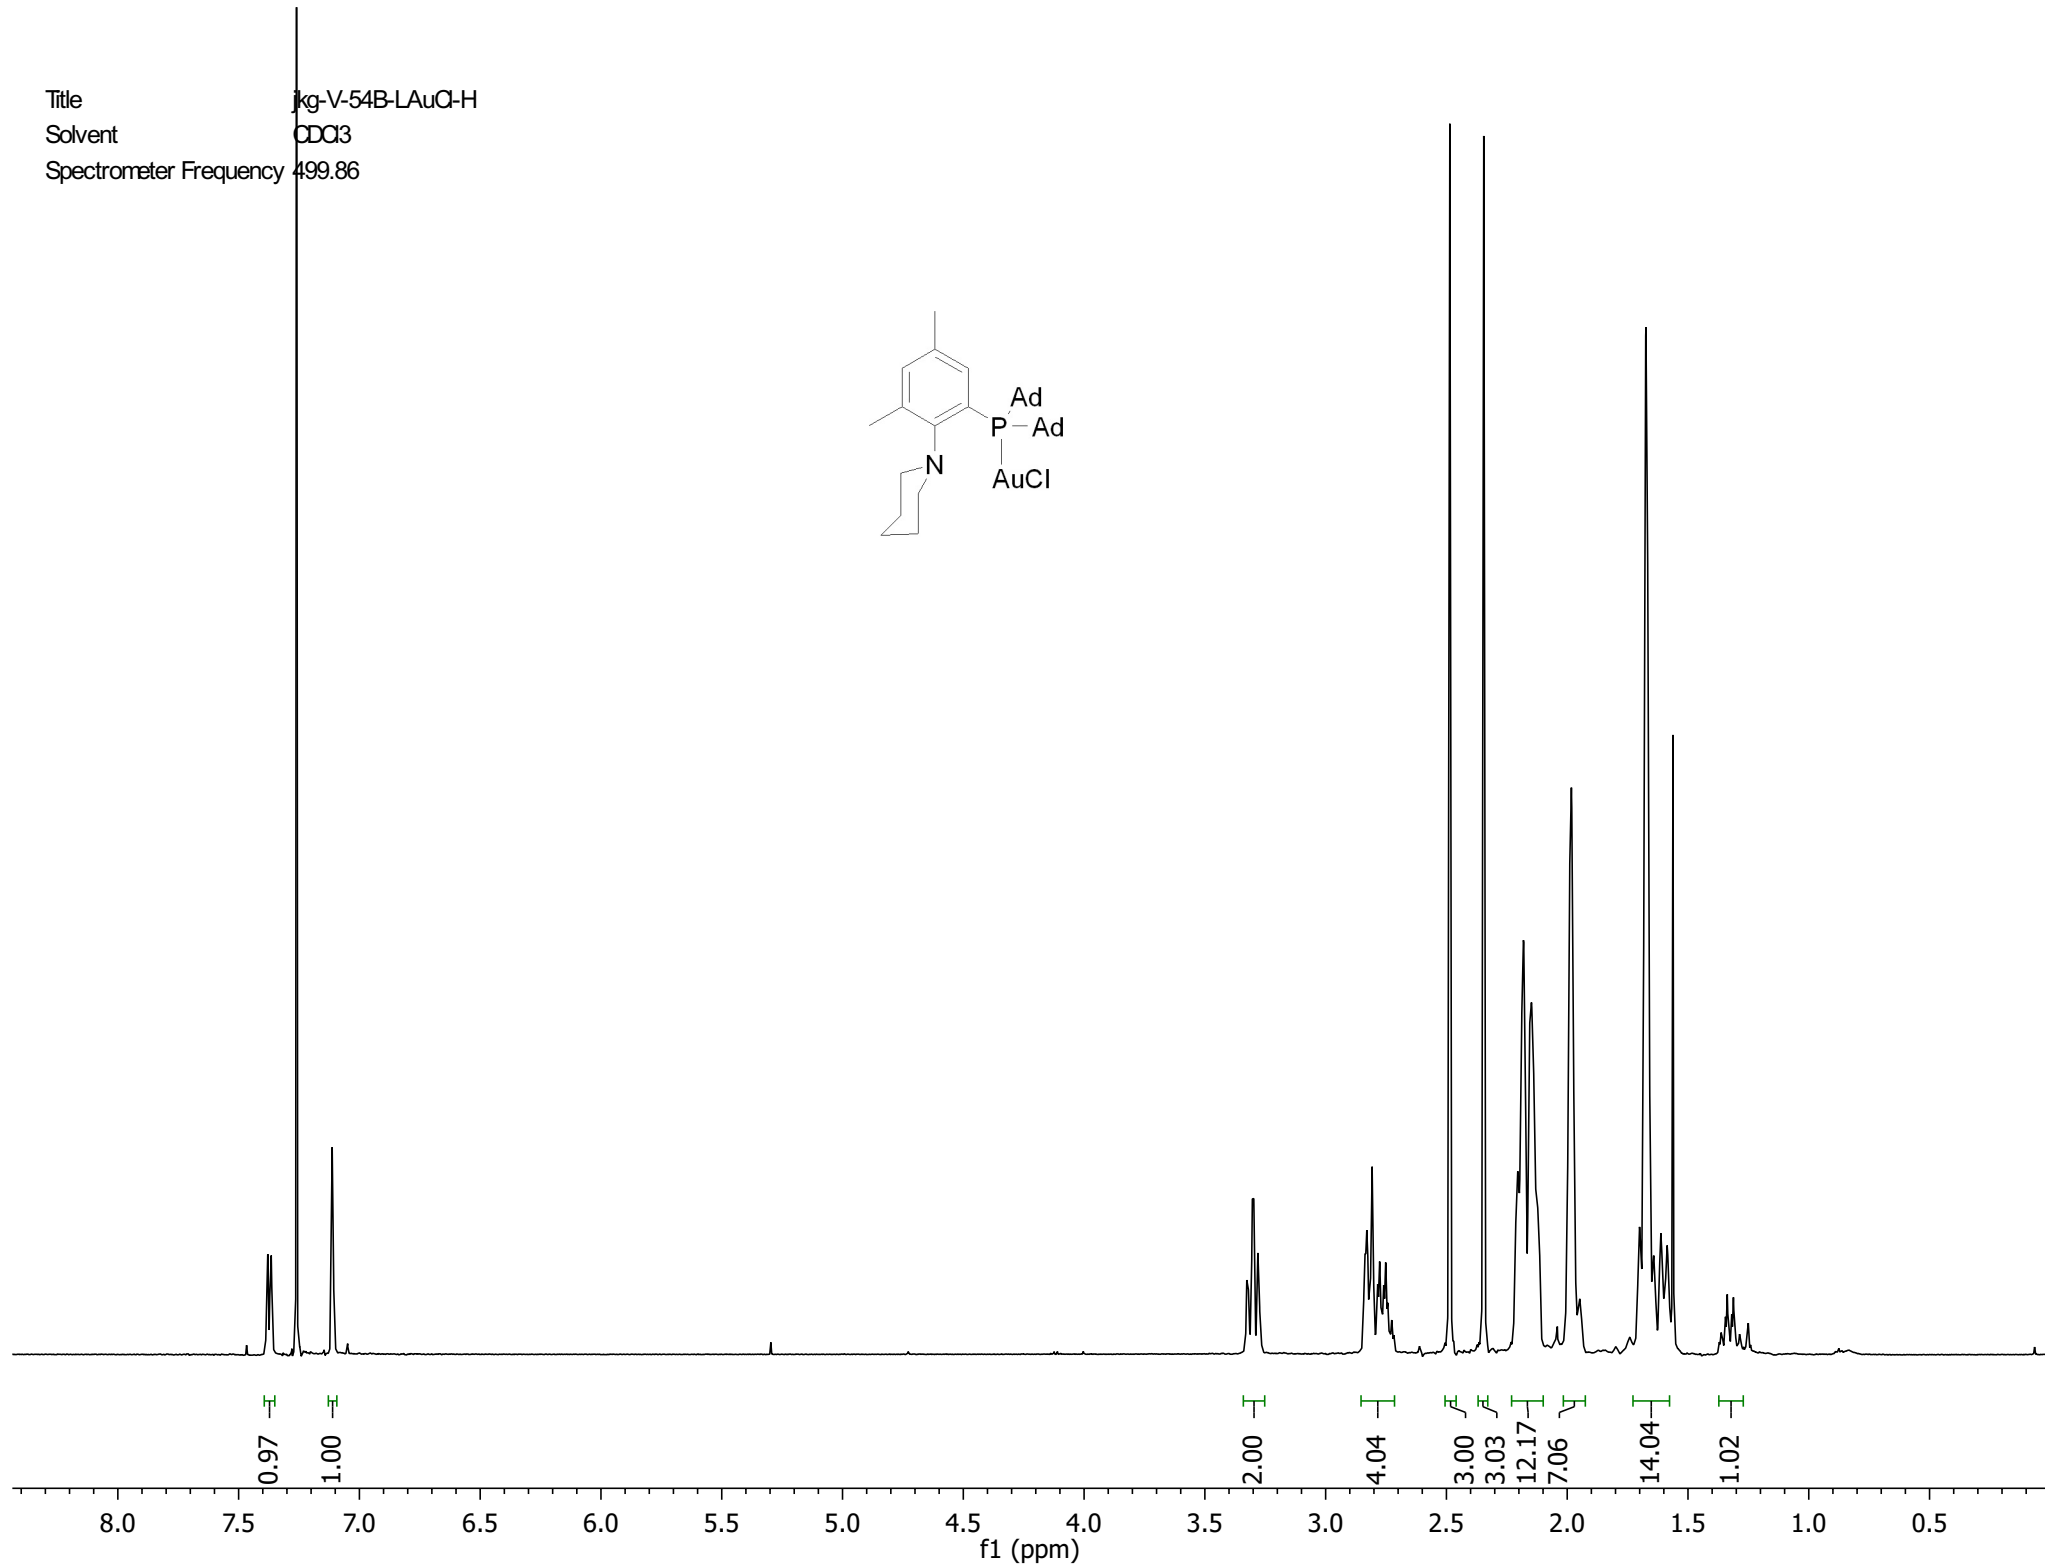

Title jkg-V-54B-LAuCl-C  
Solvent CDCl3  
Spectrometer Frequency 125.70

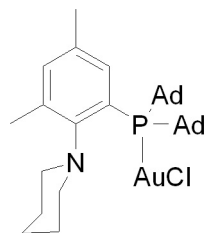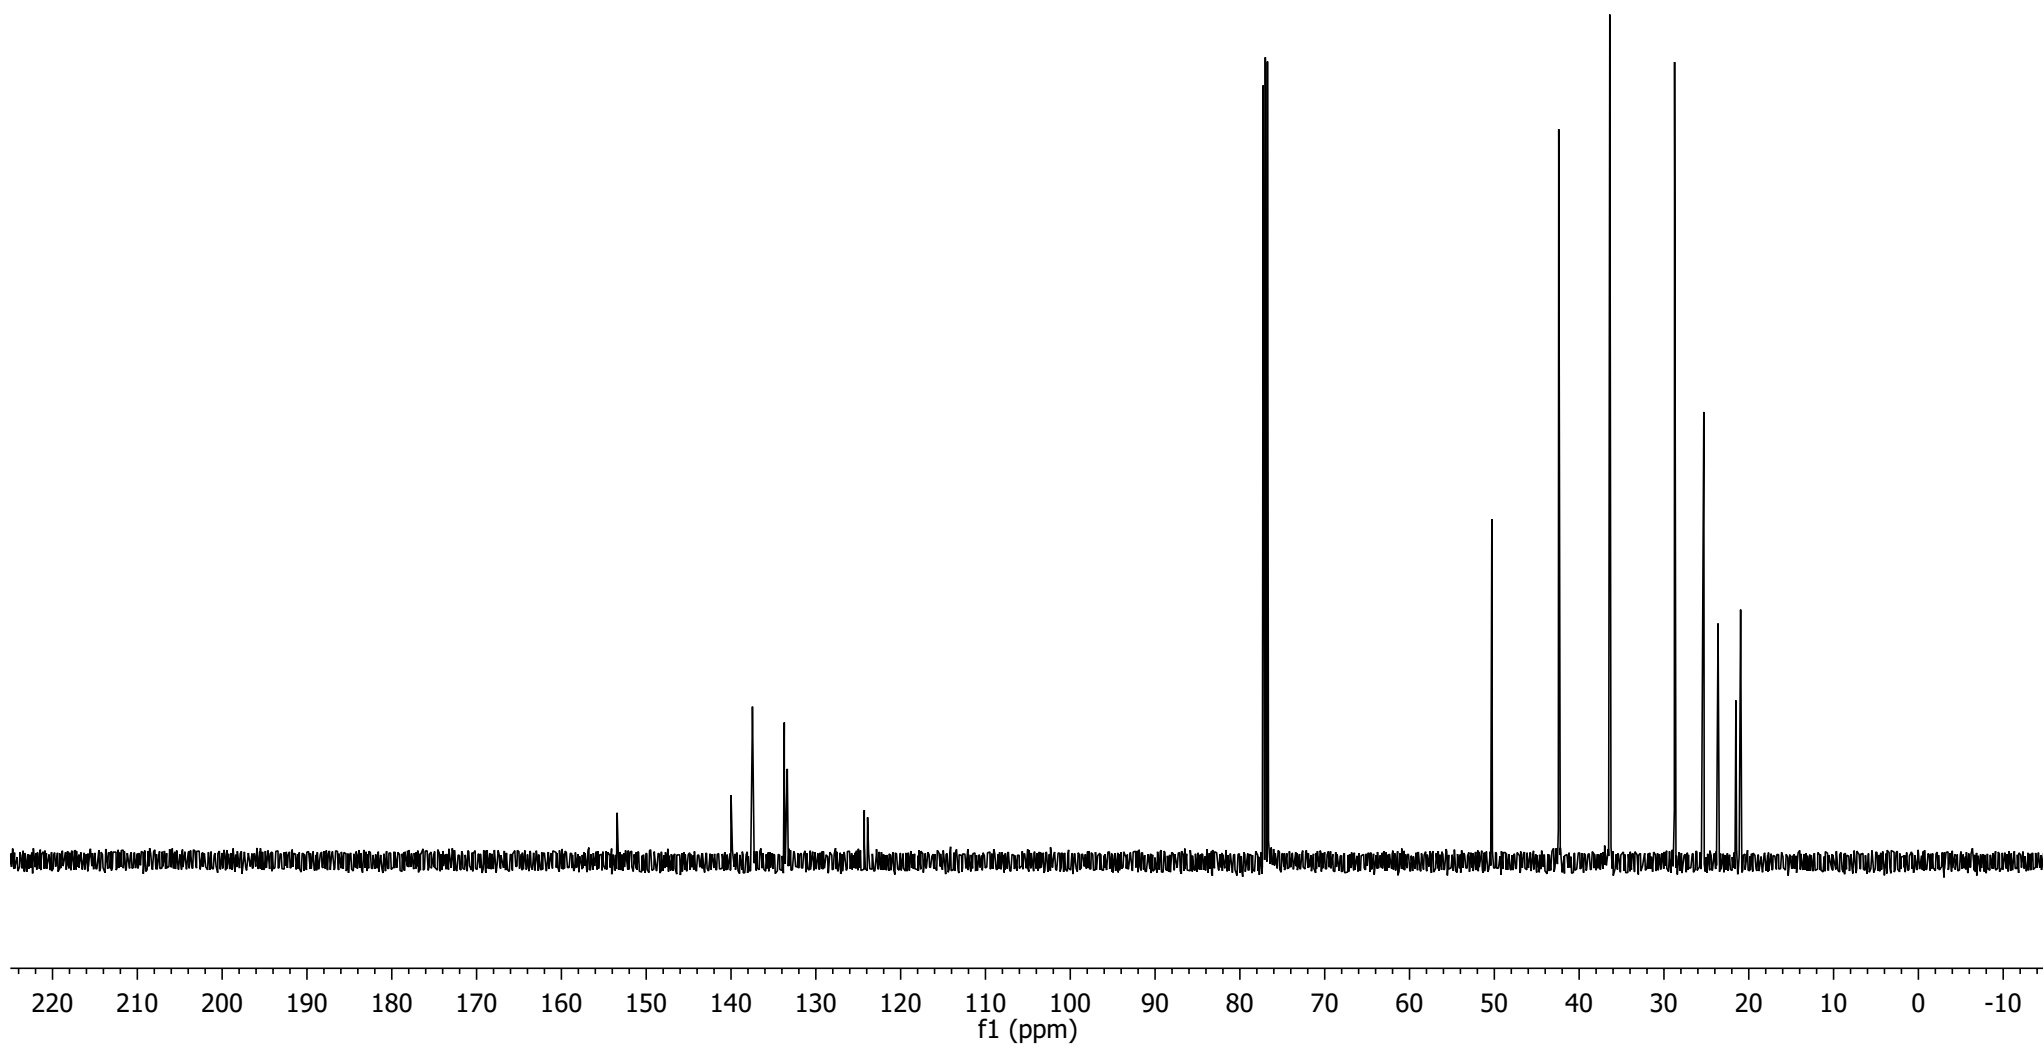

Title jkg-V-554B-LAuCl-P31  
Solvent cdcl3  
Spectrometer Frequency 161.90

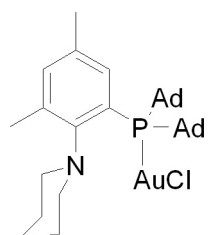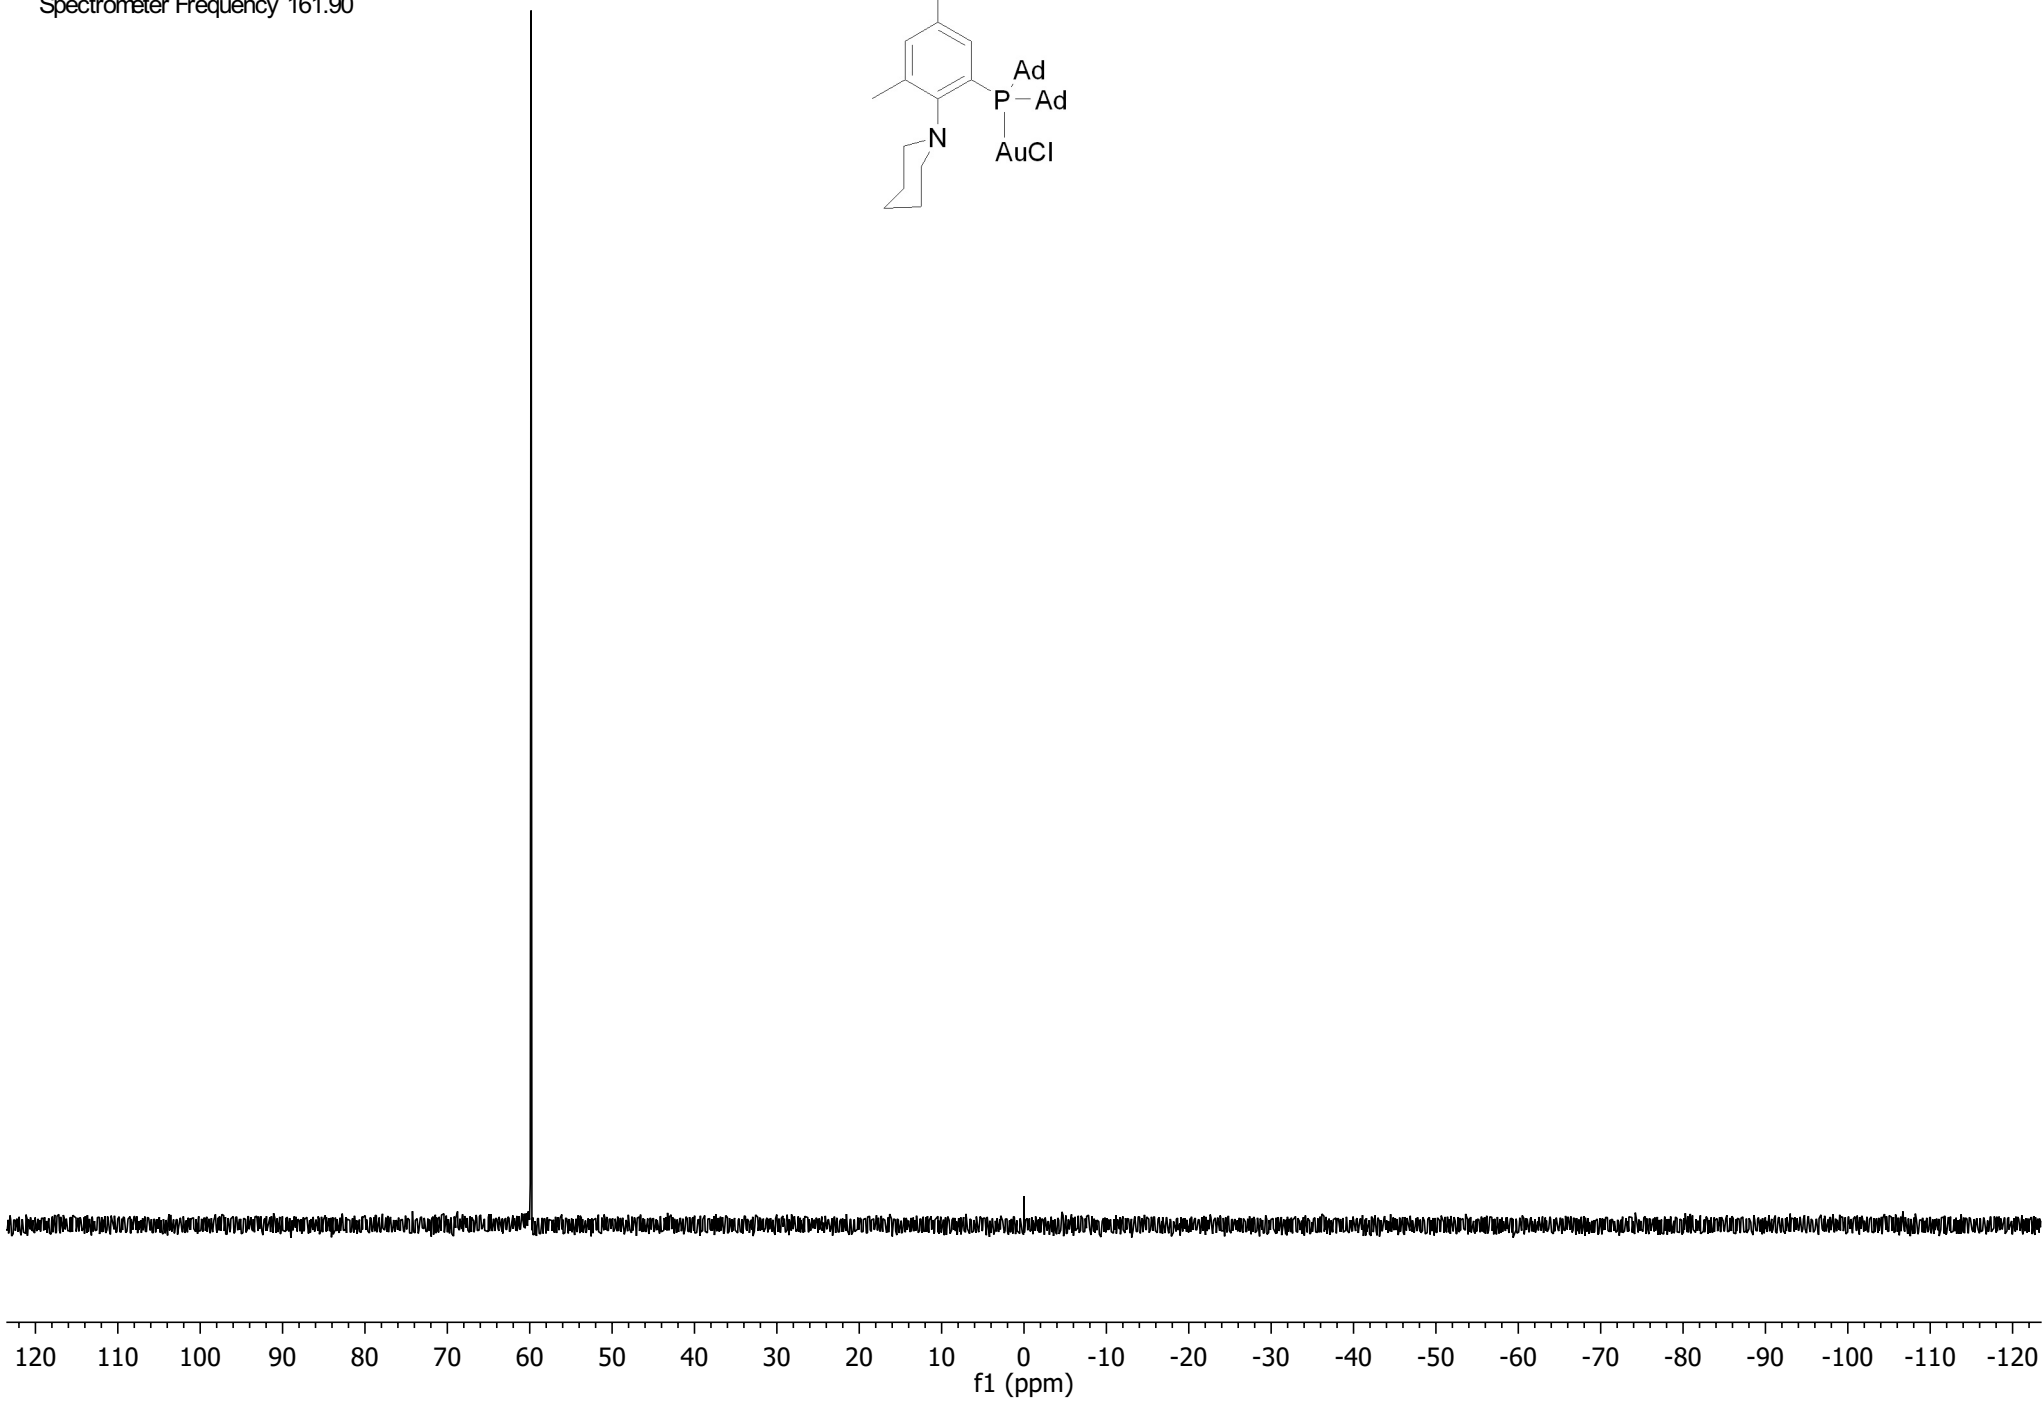

Title jkg-V-66A-Ligand-H  
Solvent CDCl3  
Spectrometer Frequency 499.86

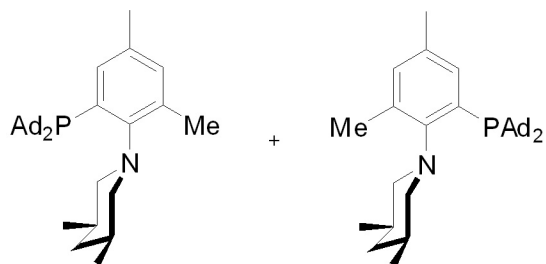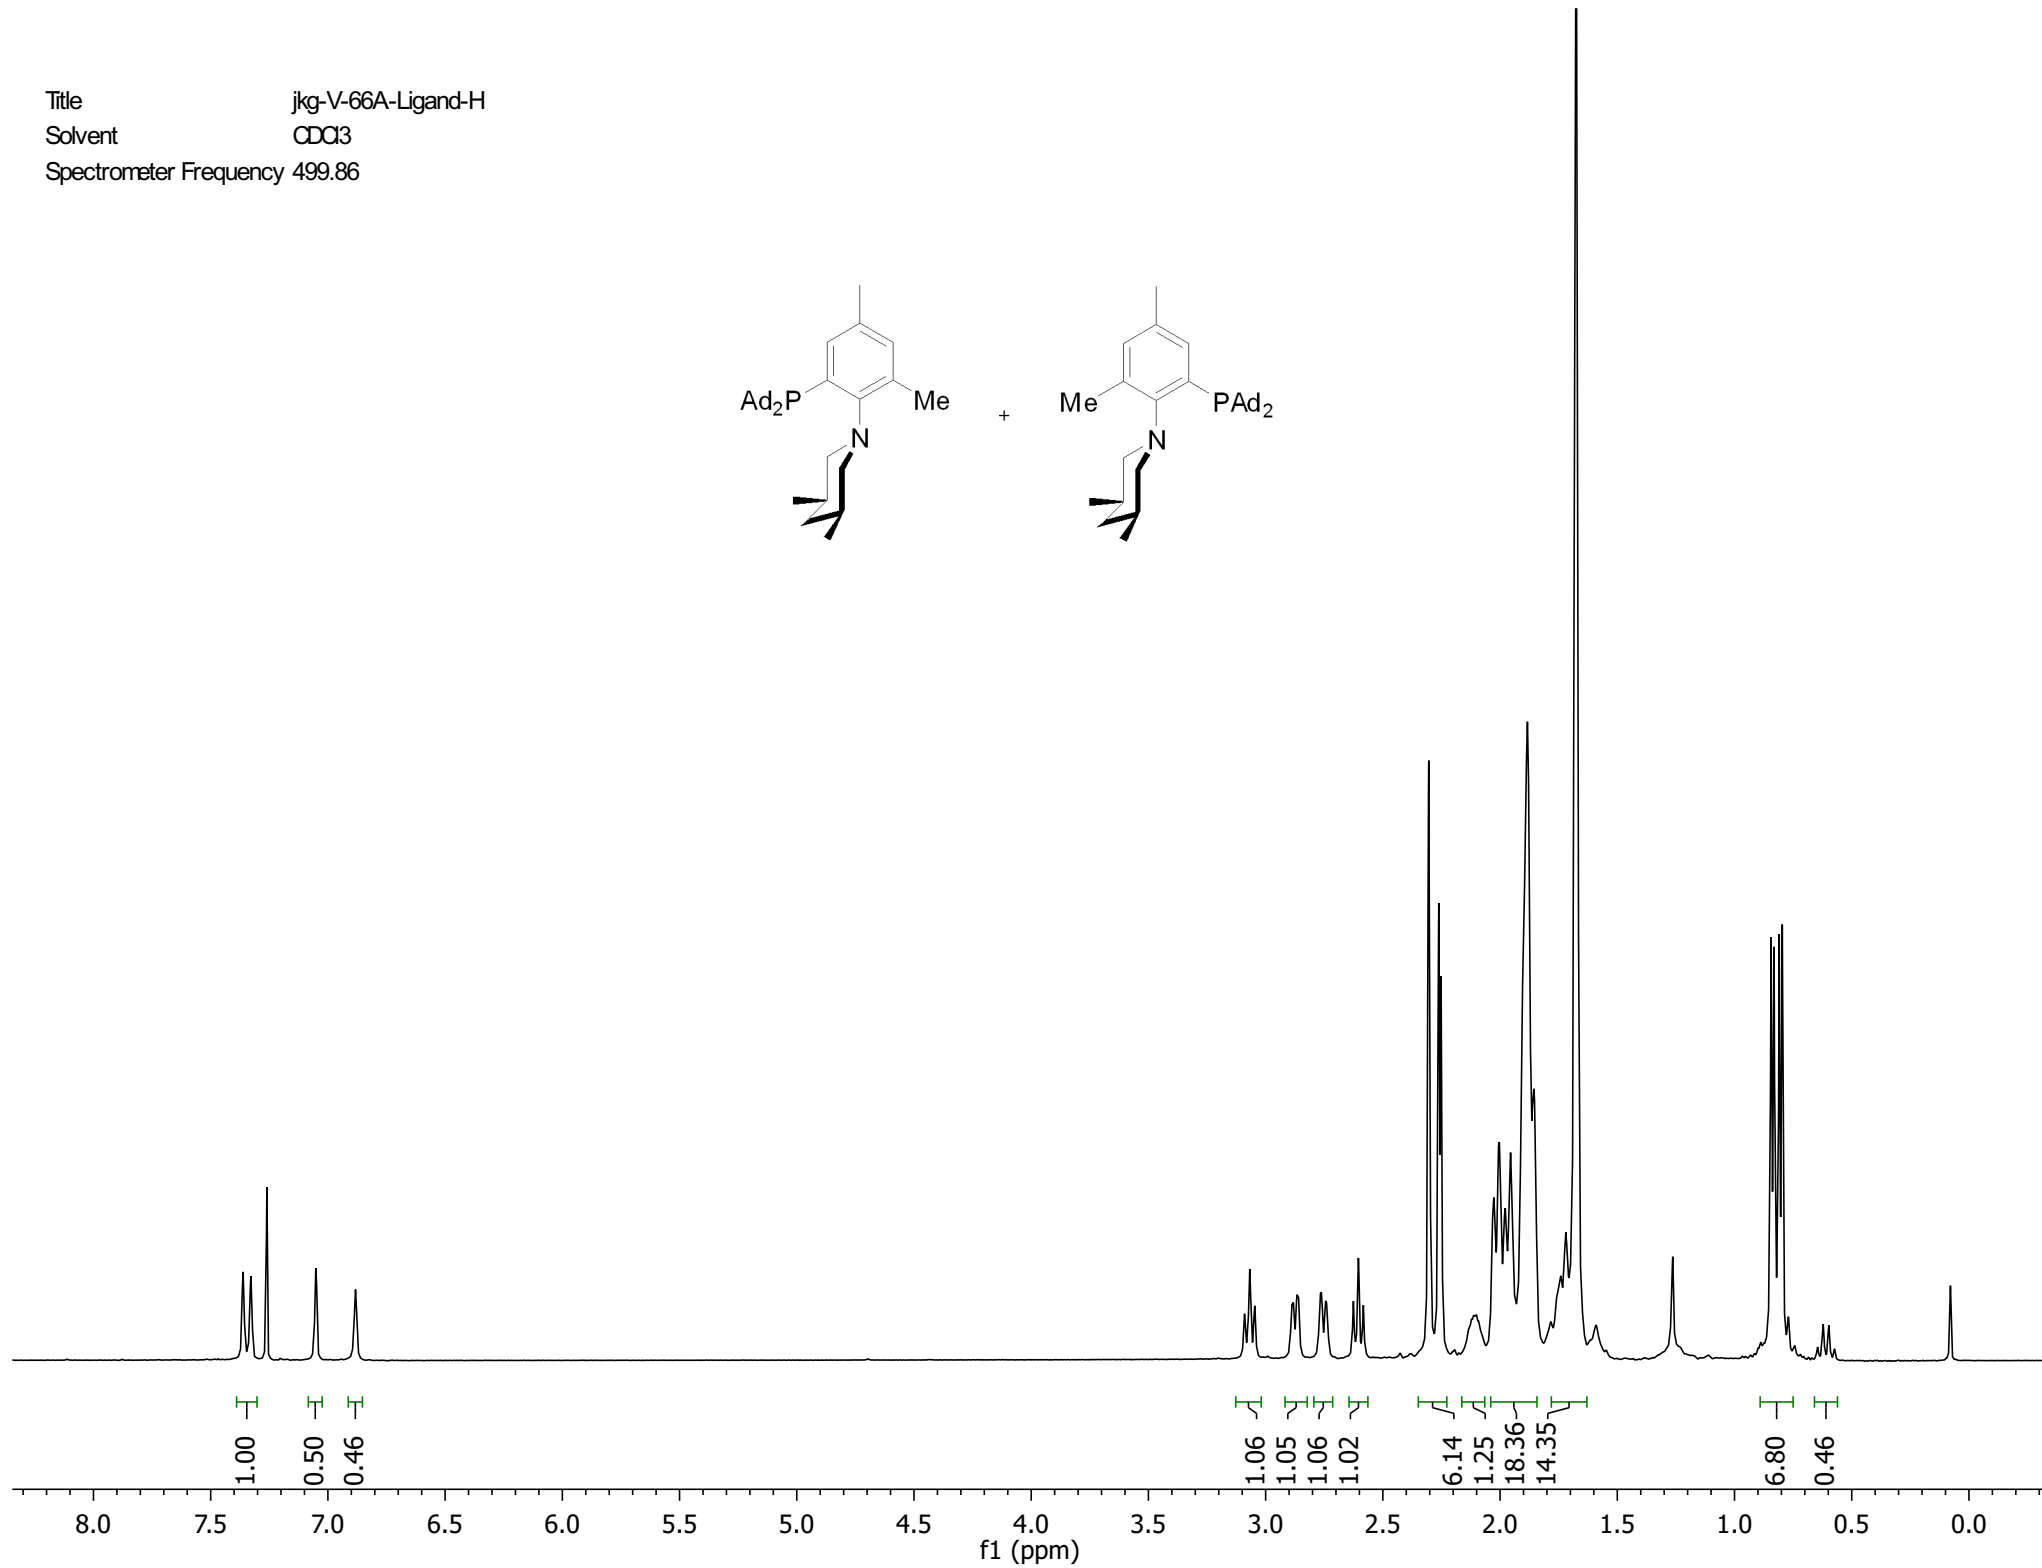

Title jkg-V-66A-Ligand-C  
Solvent CDCl3  
Spectrometer Frequency 125.70

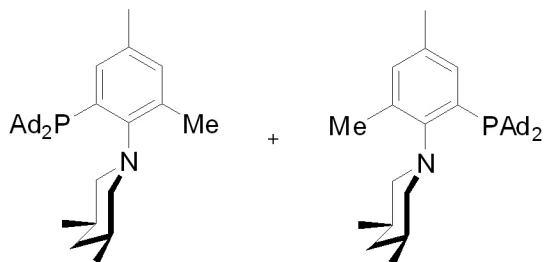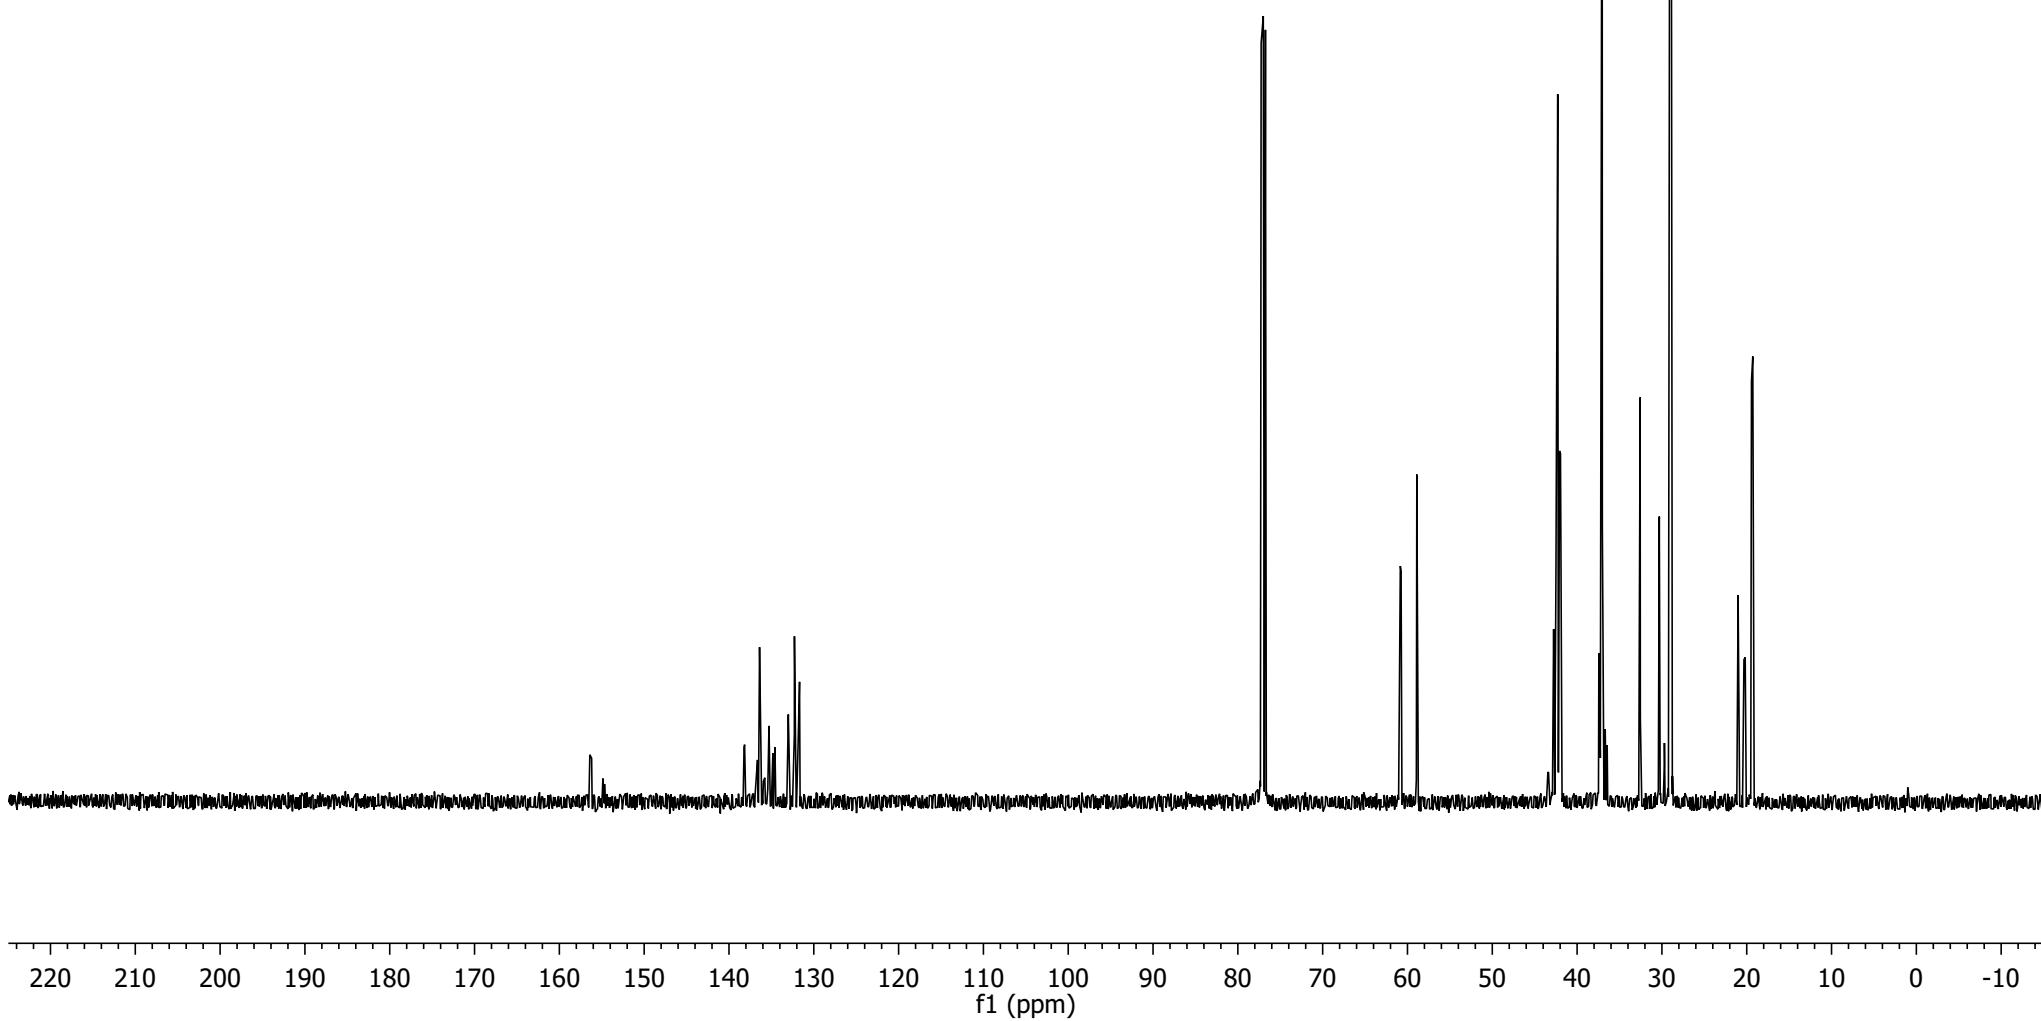

Title jkg-V-66A-Ligand-P31  
Solvent cdcl3  
Spectrometer Frequency 161.90

21.86  
21.59

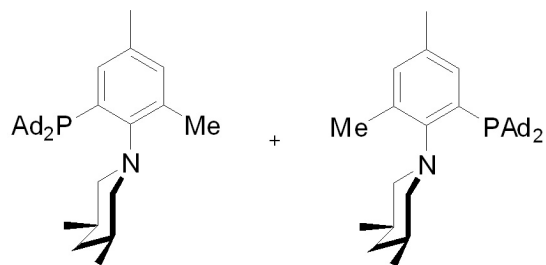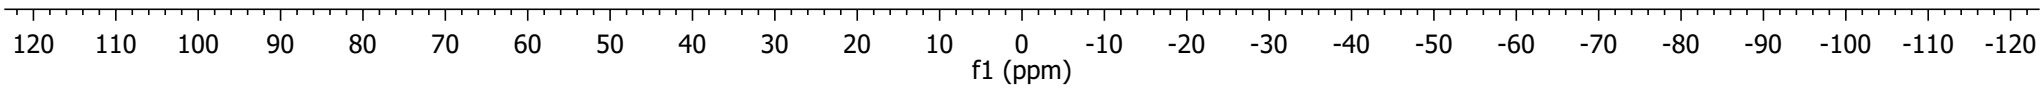

Title jkg-V-67-LAuCl-H  
Solvent CDCl3  
Spectrometer Frequency 499.86

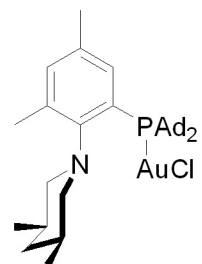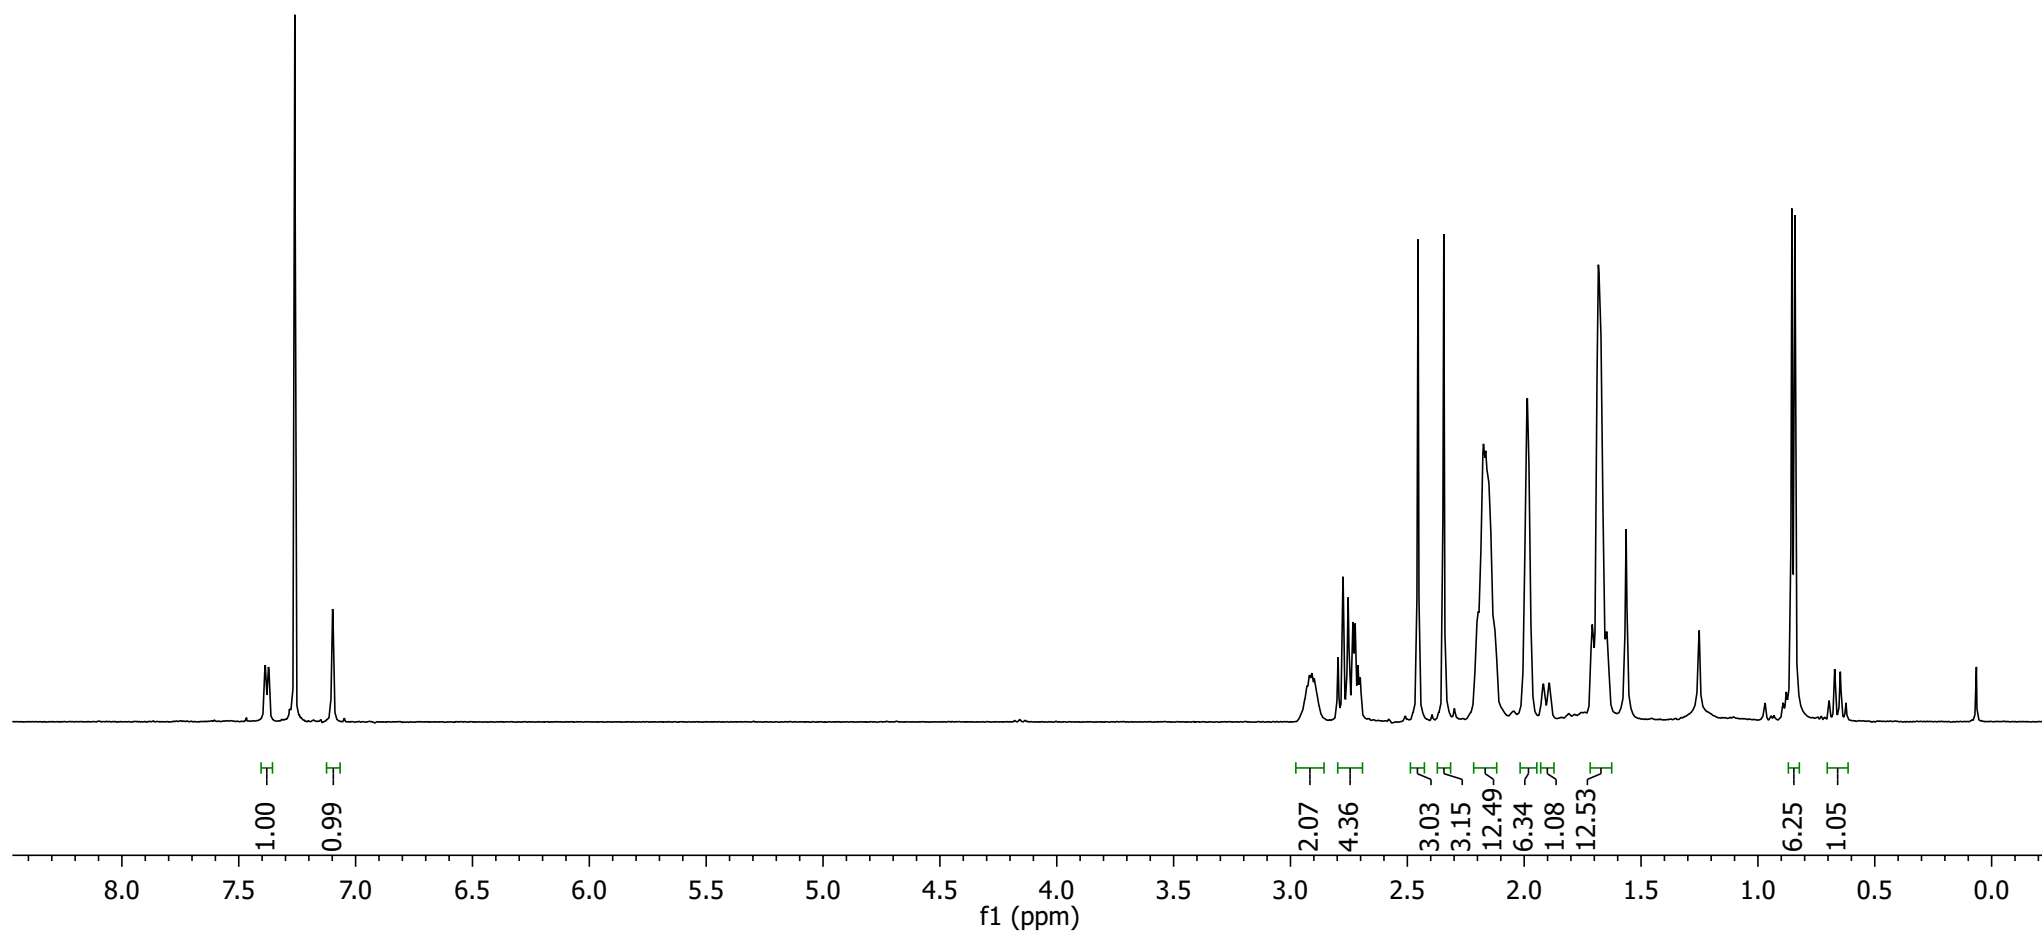

Title jkg-V-67-LAuCl-C  
Solvent CDCl3  
Spectrometer Frequency 125.70

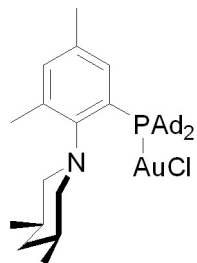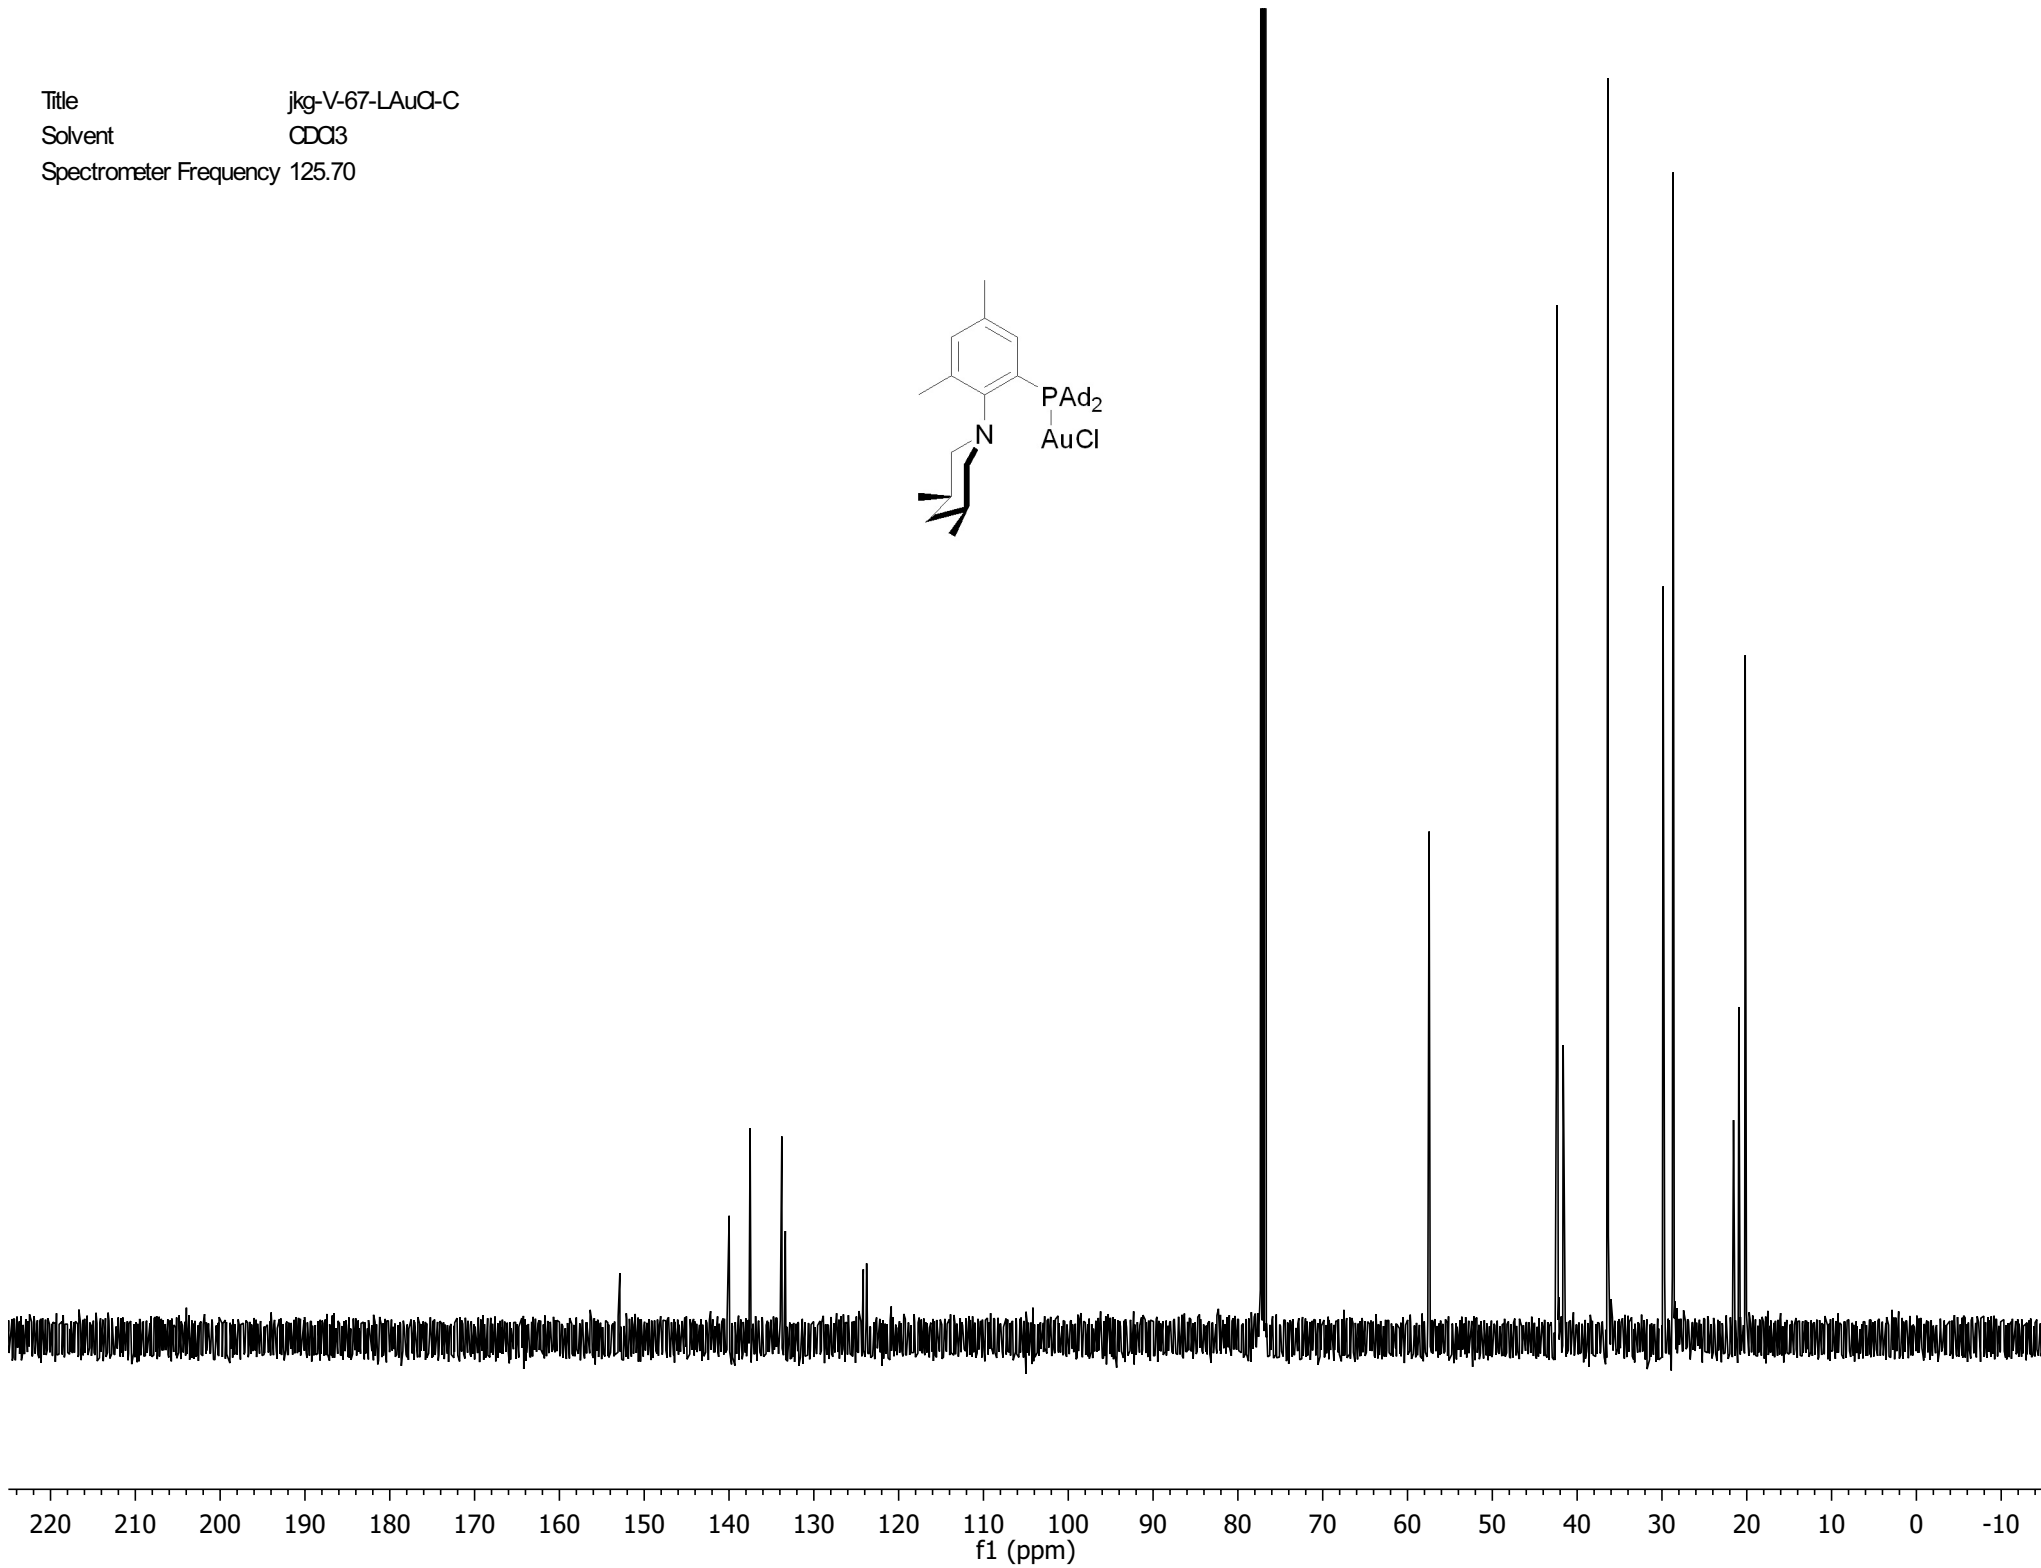



Title jkg-V-67V-P31  
Solvent cdcl3  
Spectrometer Frequency 161.90

59.64

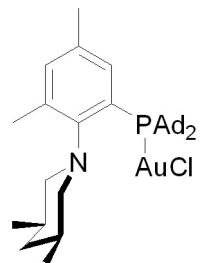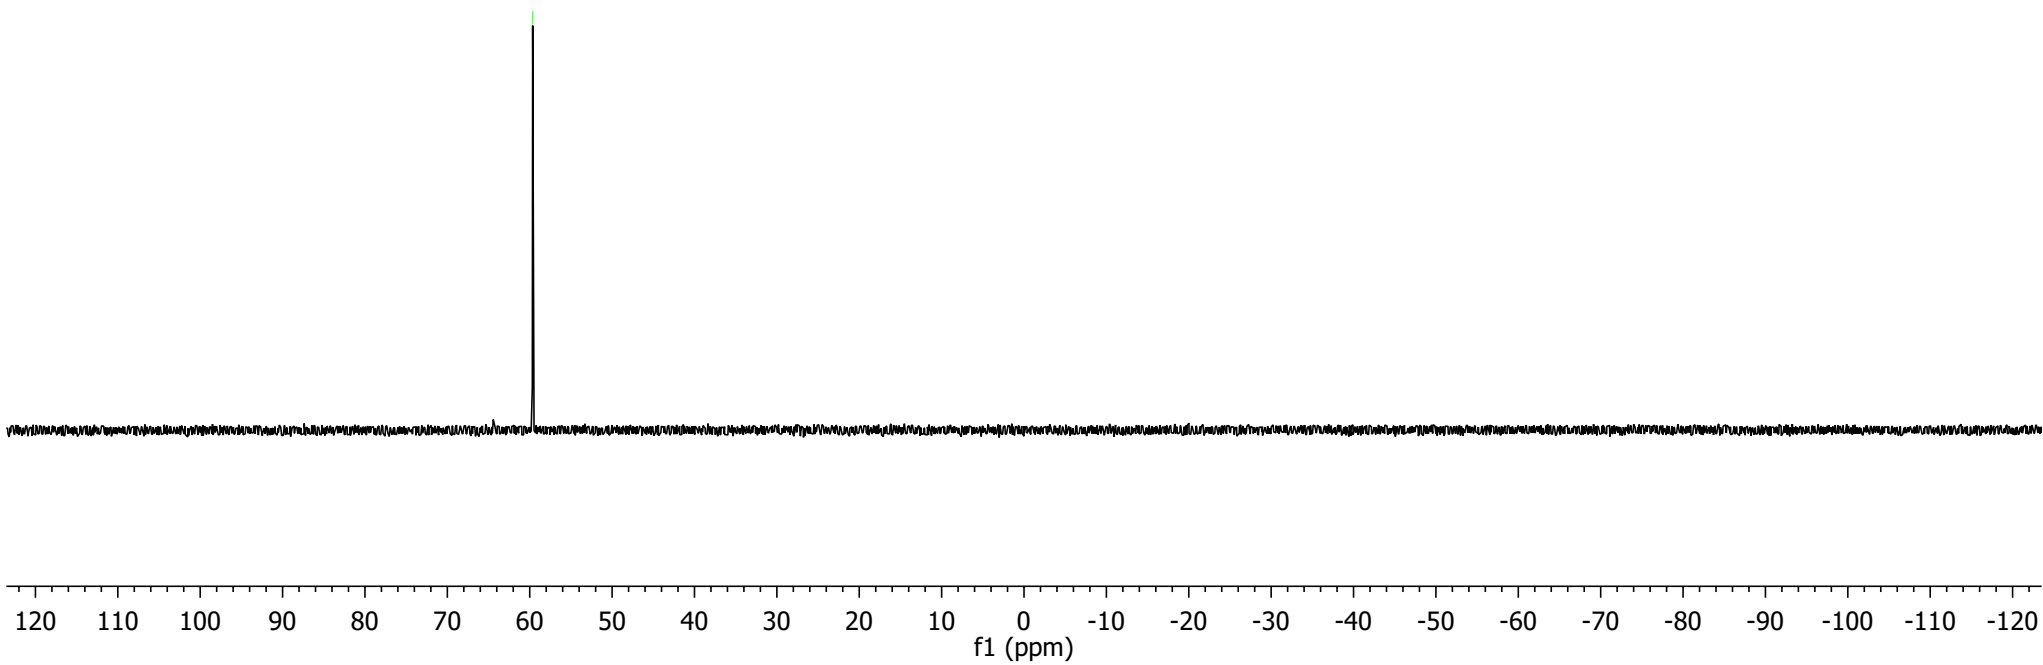

Title zhaoyl-1-856  
Solvent CDCl3  
Spectrometer Frequency 499.86

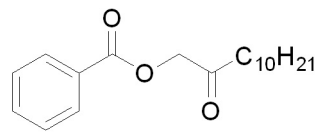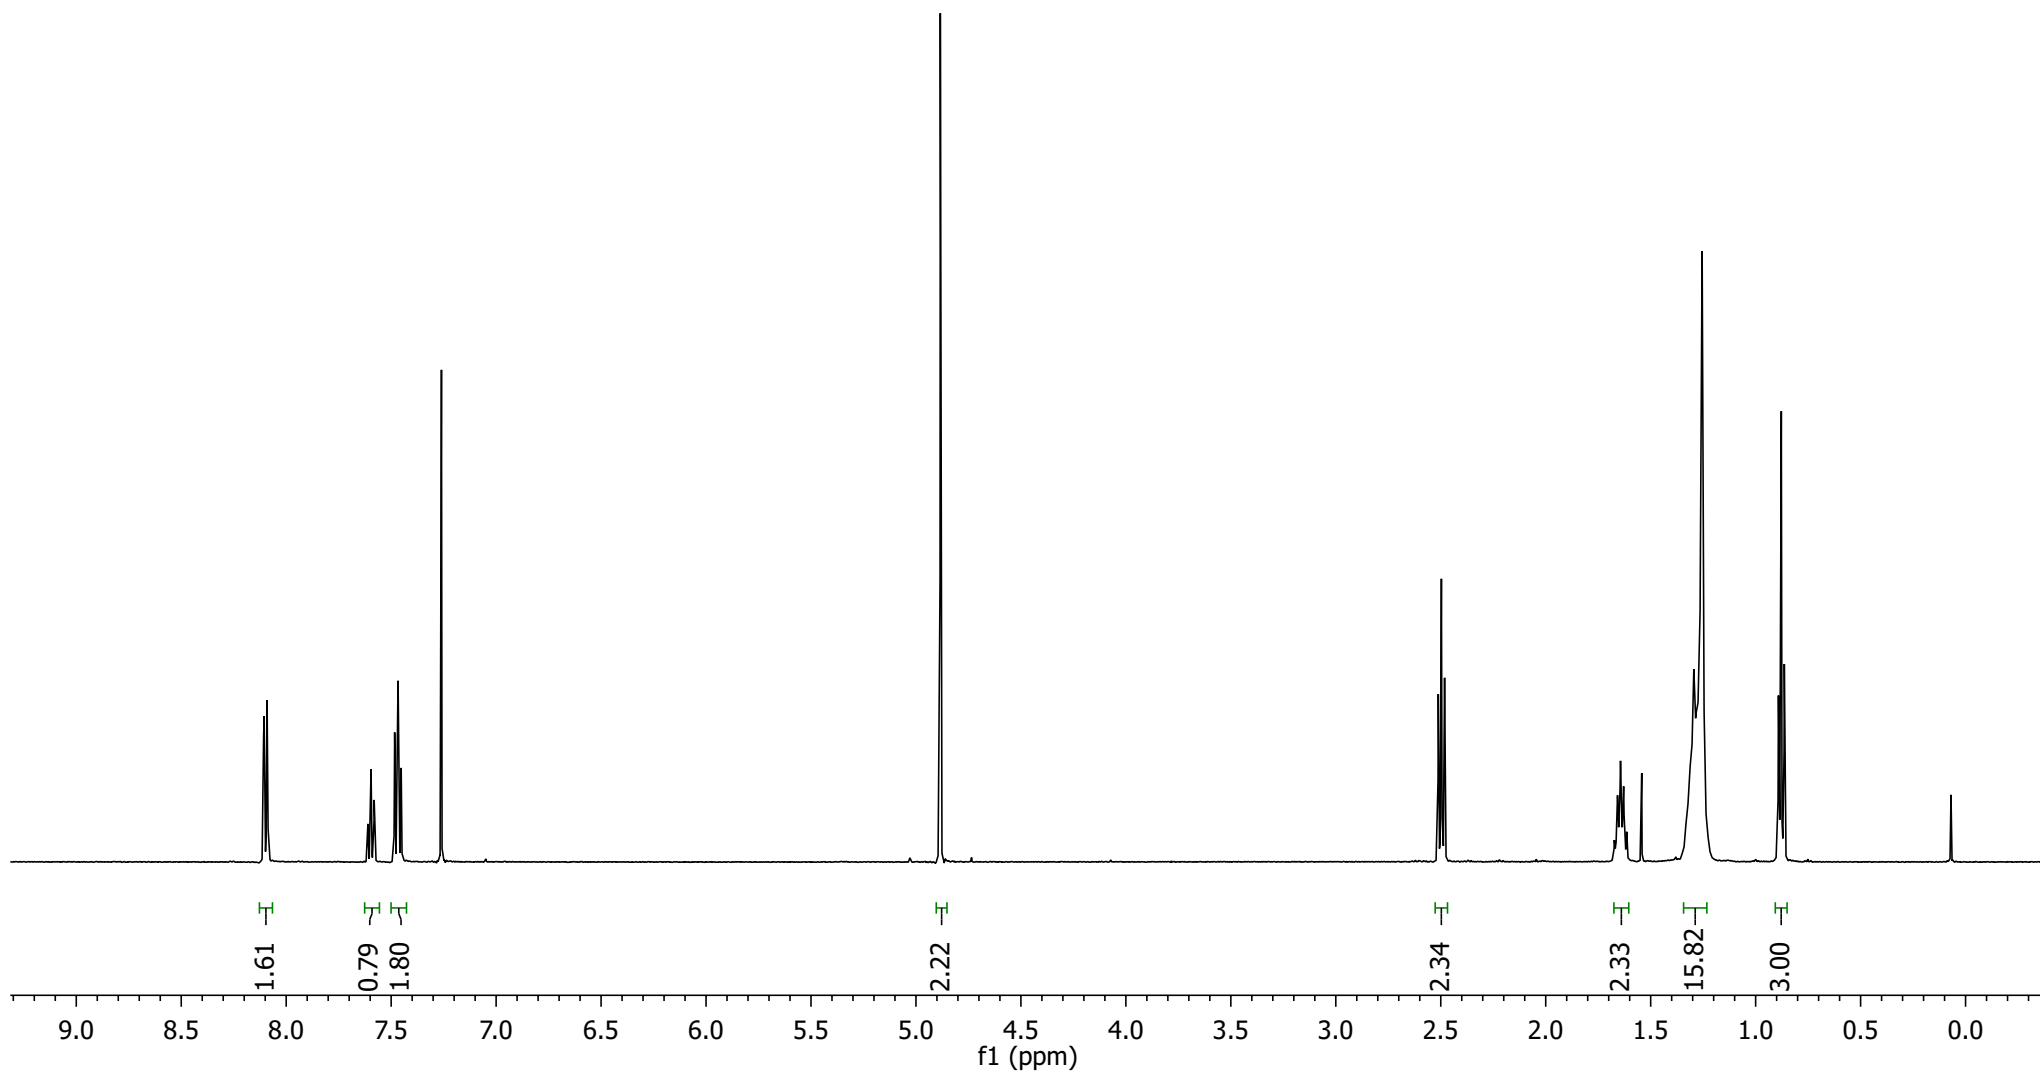

Title zhaoyl-1-86-C  
Solvent CDCl3  
Spectrometer Frequency 125.70

204.17

165.86

133.37

129.86

129.27

128.45

68.38

38.93

31.86

29.52

29.41

29.33

29.27

29.15

27.09

14.09

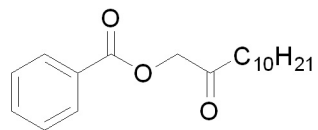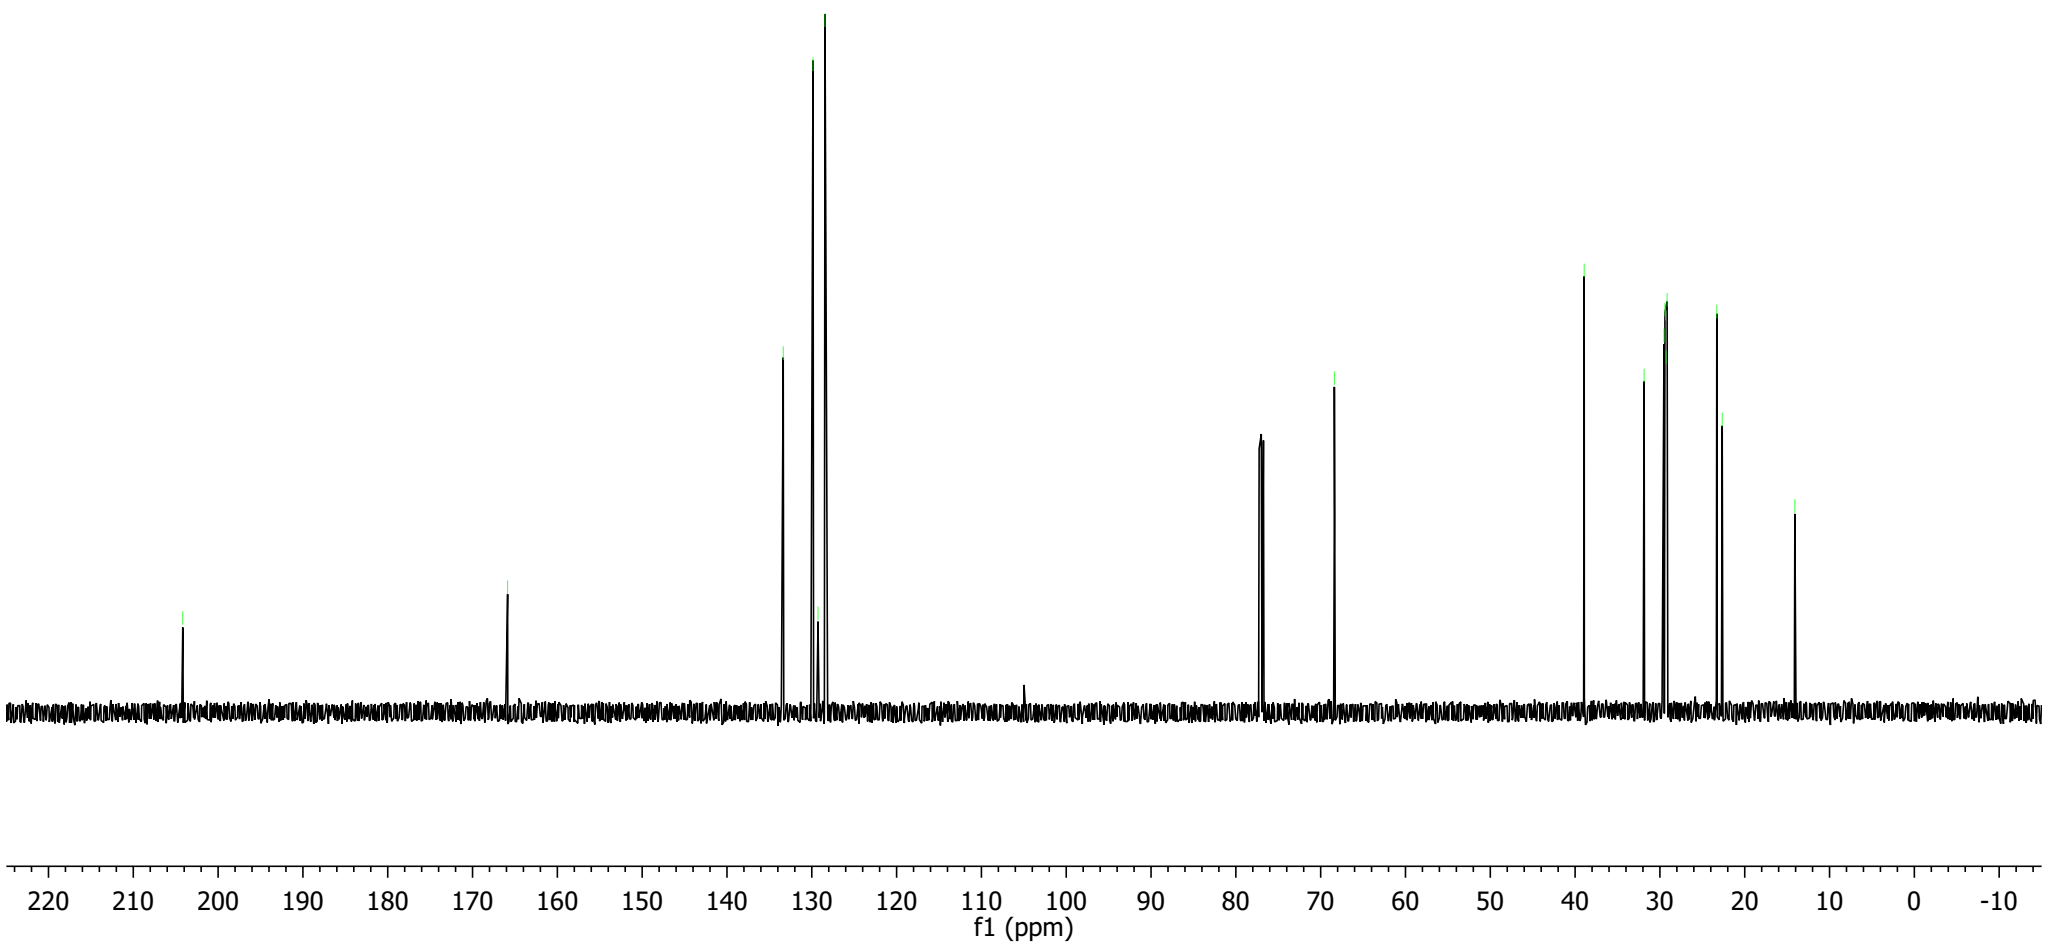

Title zhaoyl-1-88-1  
Solvent CDCl3  
Spectrometer Frequency 499.86

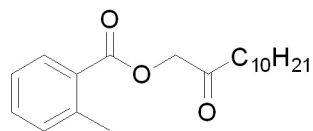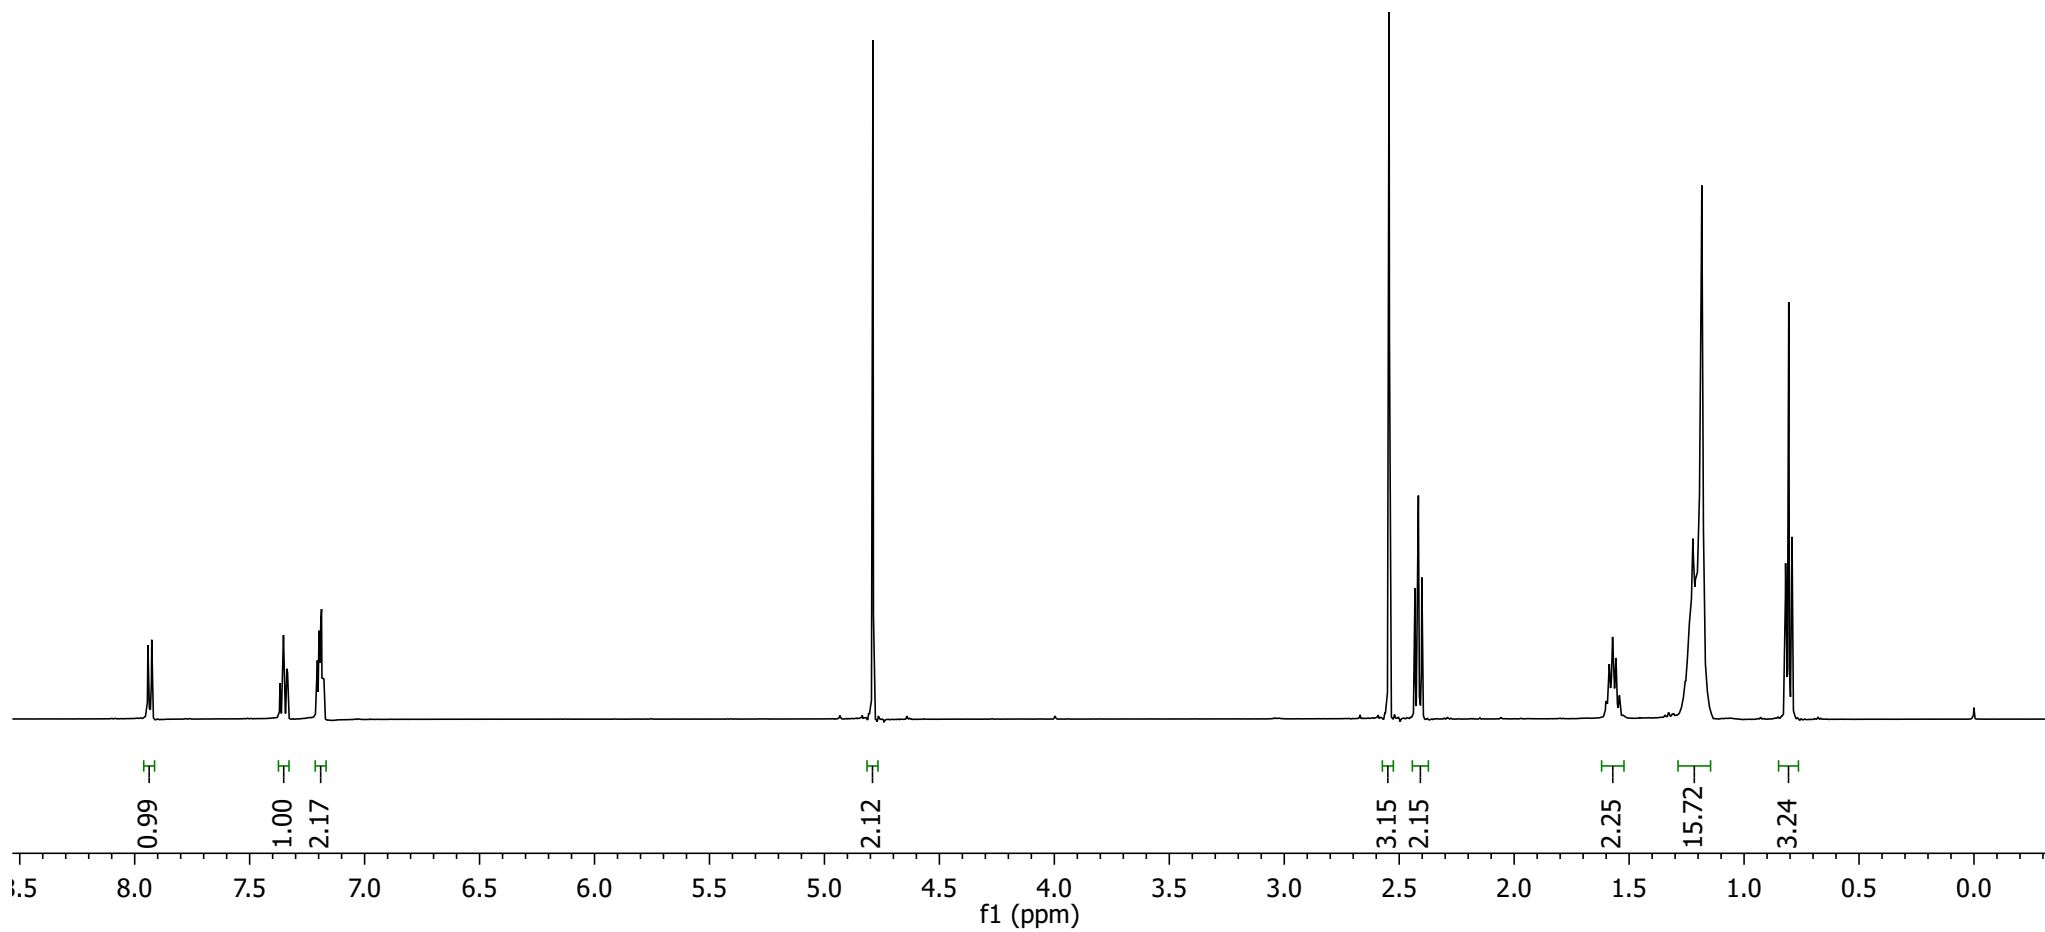

Title zhaoyl-1-88-C  
Solvent cdcl3  
Spectrometer Frequency 150.79

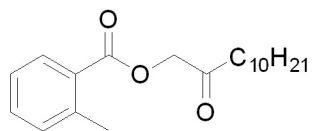

204.16  
166.69  
140.64  
132.36  
131.69  
130.81  
125.75  
68.18  
38.92  
31.86  
29.52  
29.41  
29.33  
29.27  
29.15  
27.09  
14.09

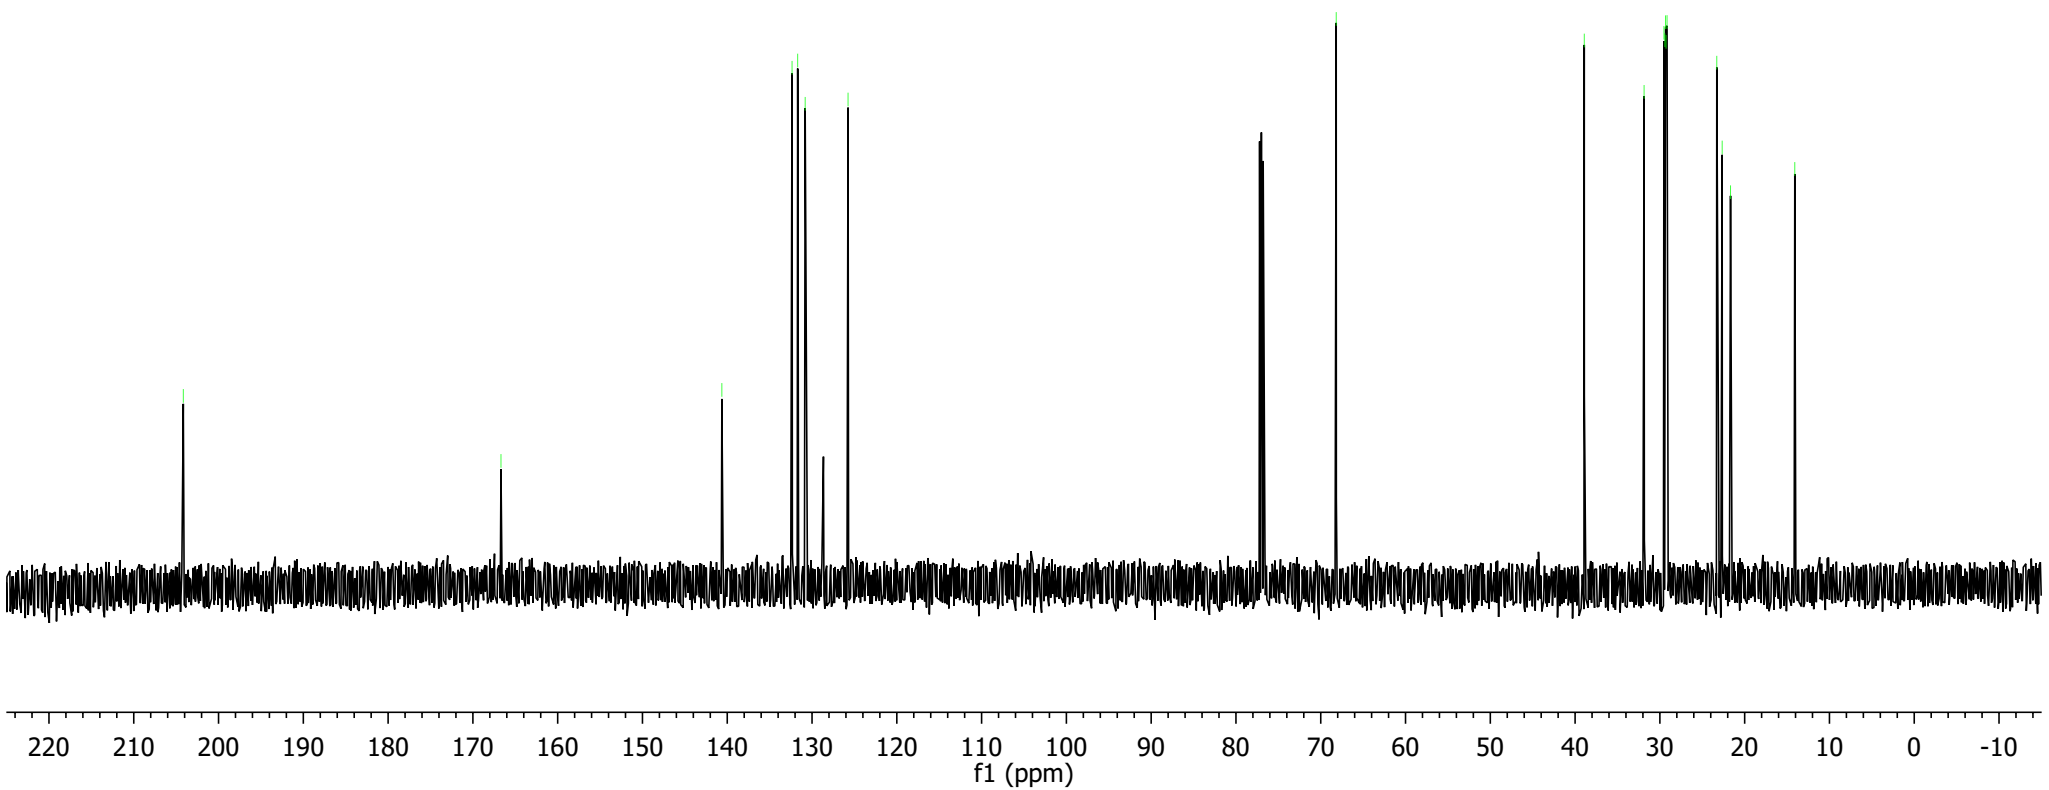

Title zhaoyl-1-83  
Solvent CDCl3  
Spectrometer Frequency 499.86

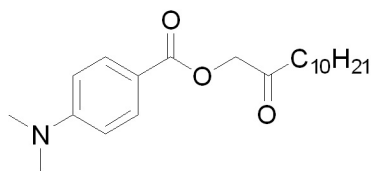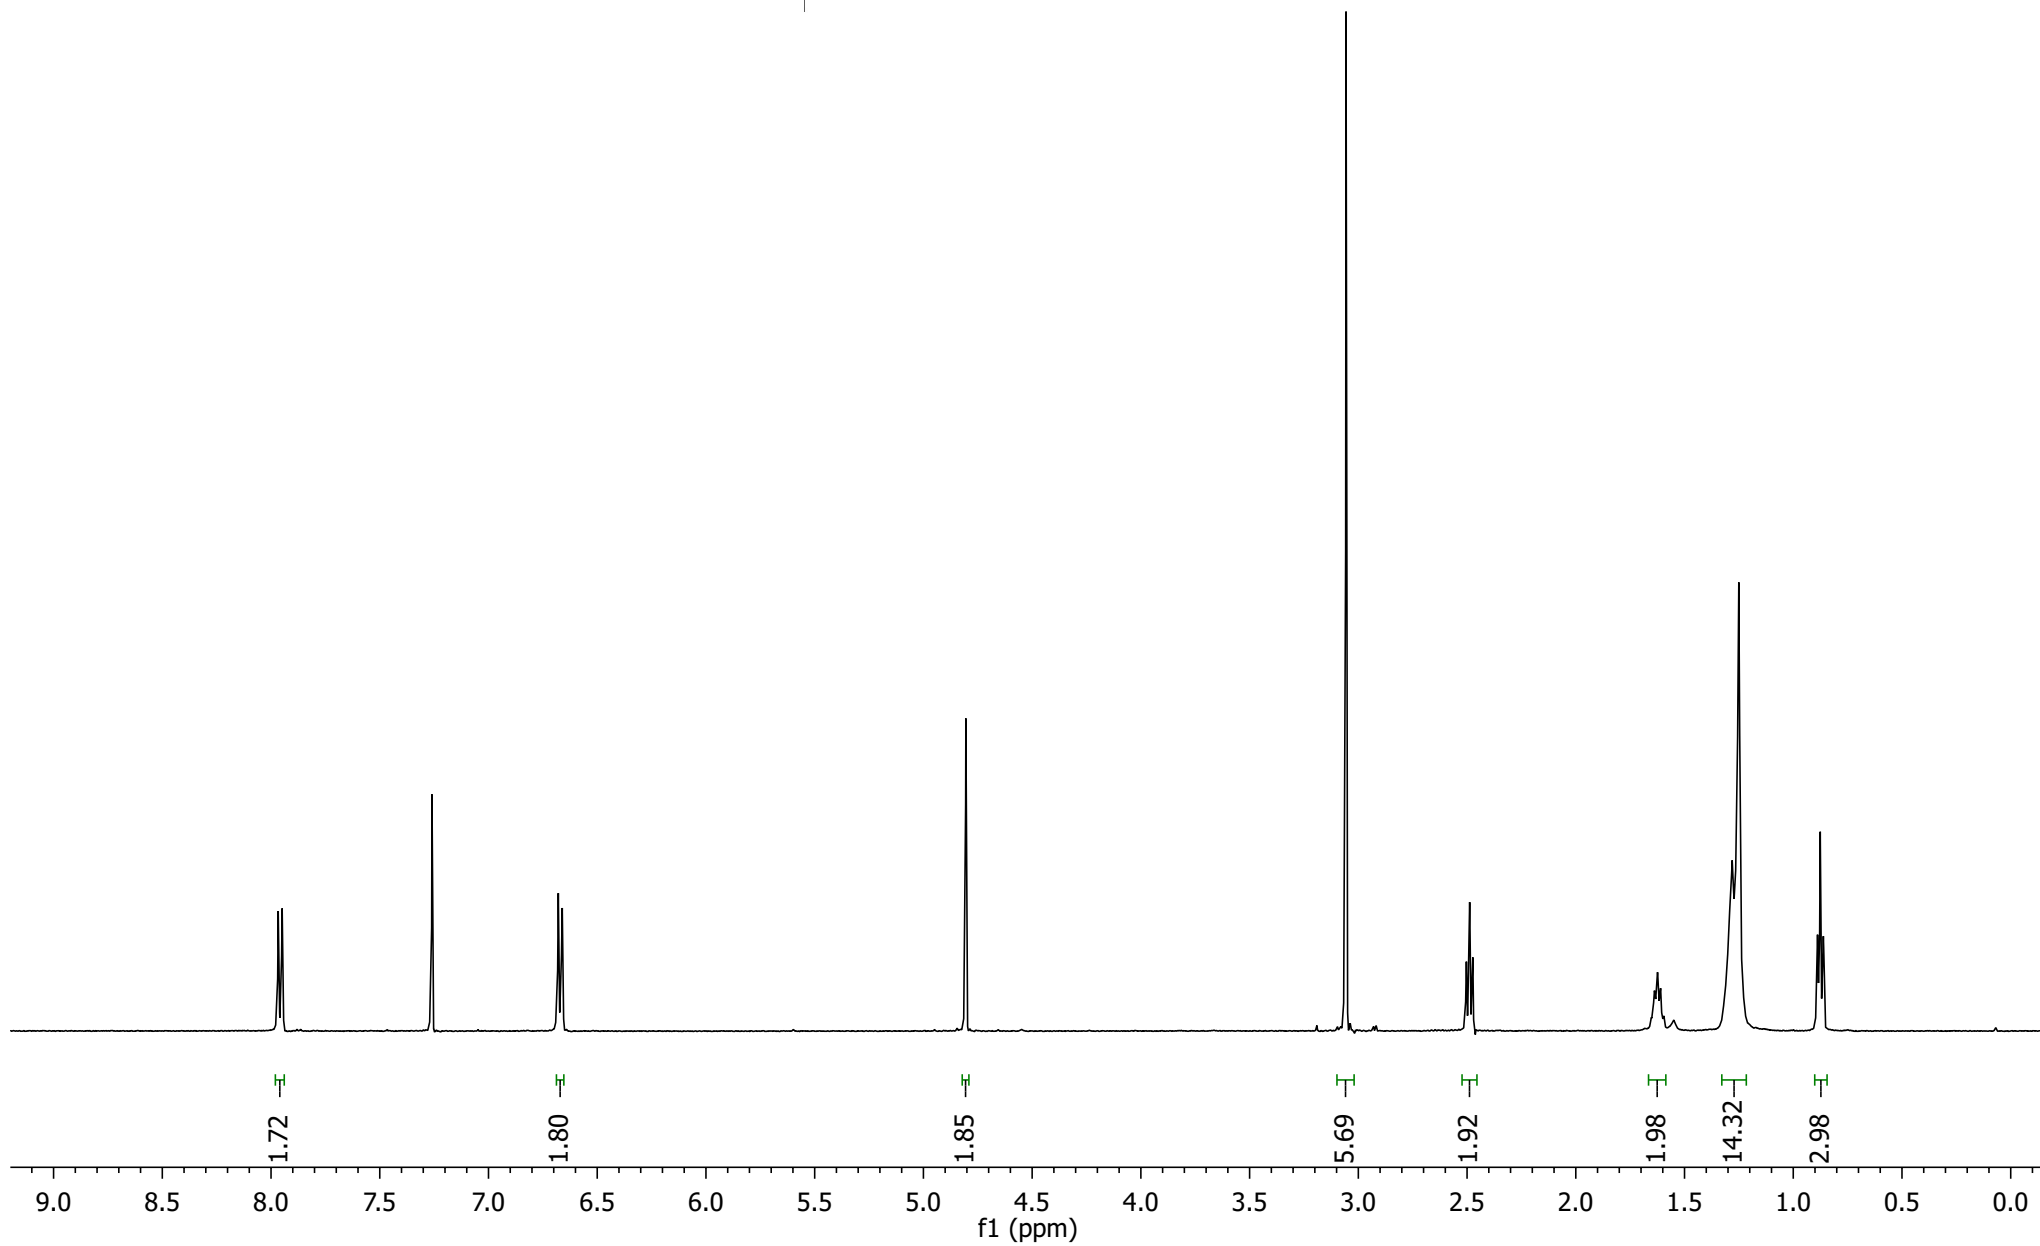

Title zhaoyl-1-83-C  
Solvent CDCl3  
Spectrometer Frequency 125.70

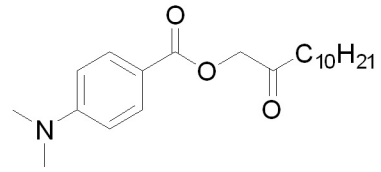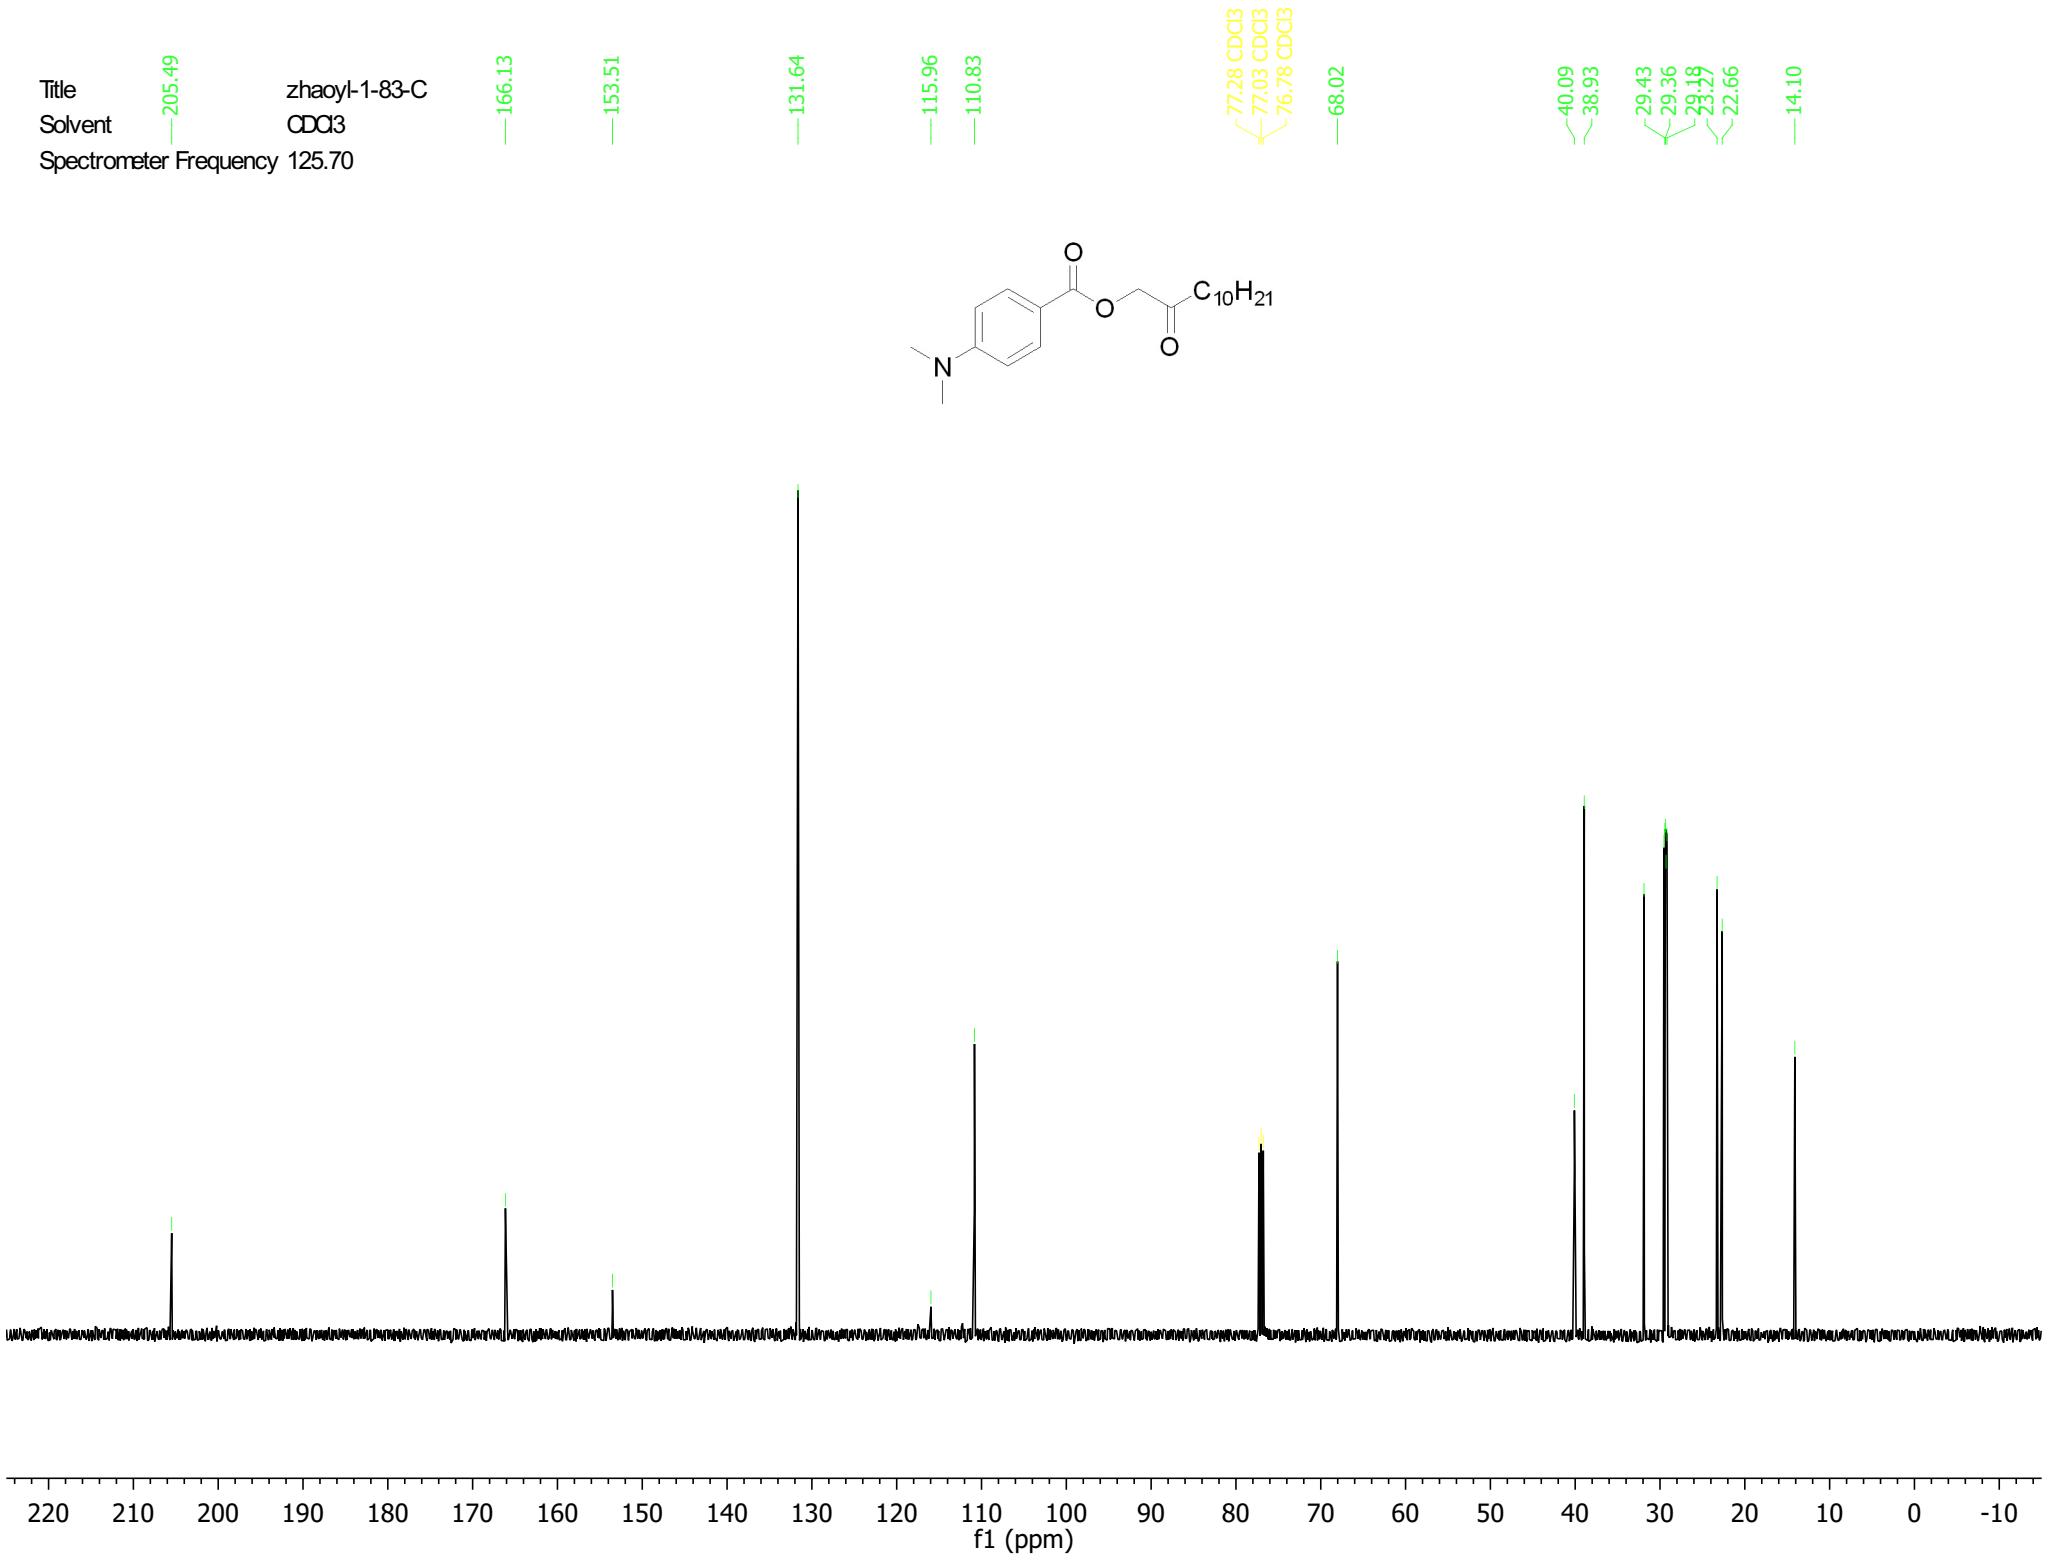

Title zhaoyl-1-89-1  
Solvent CDCl3  
Spectrometer Frequency 499.86

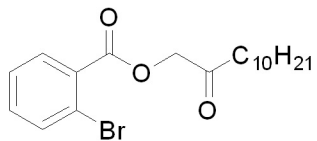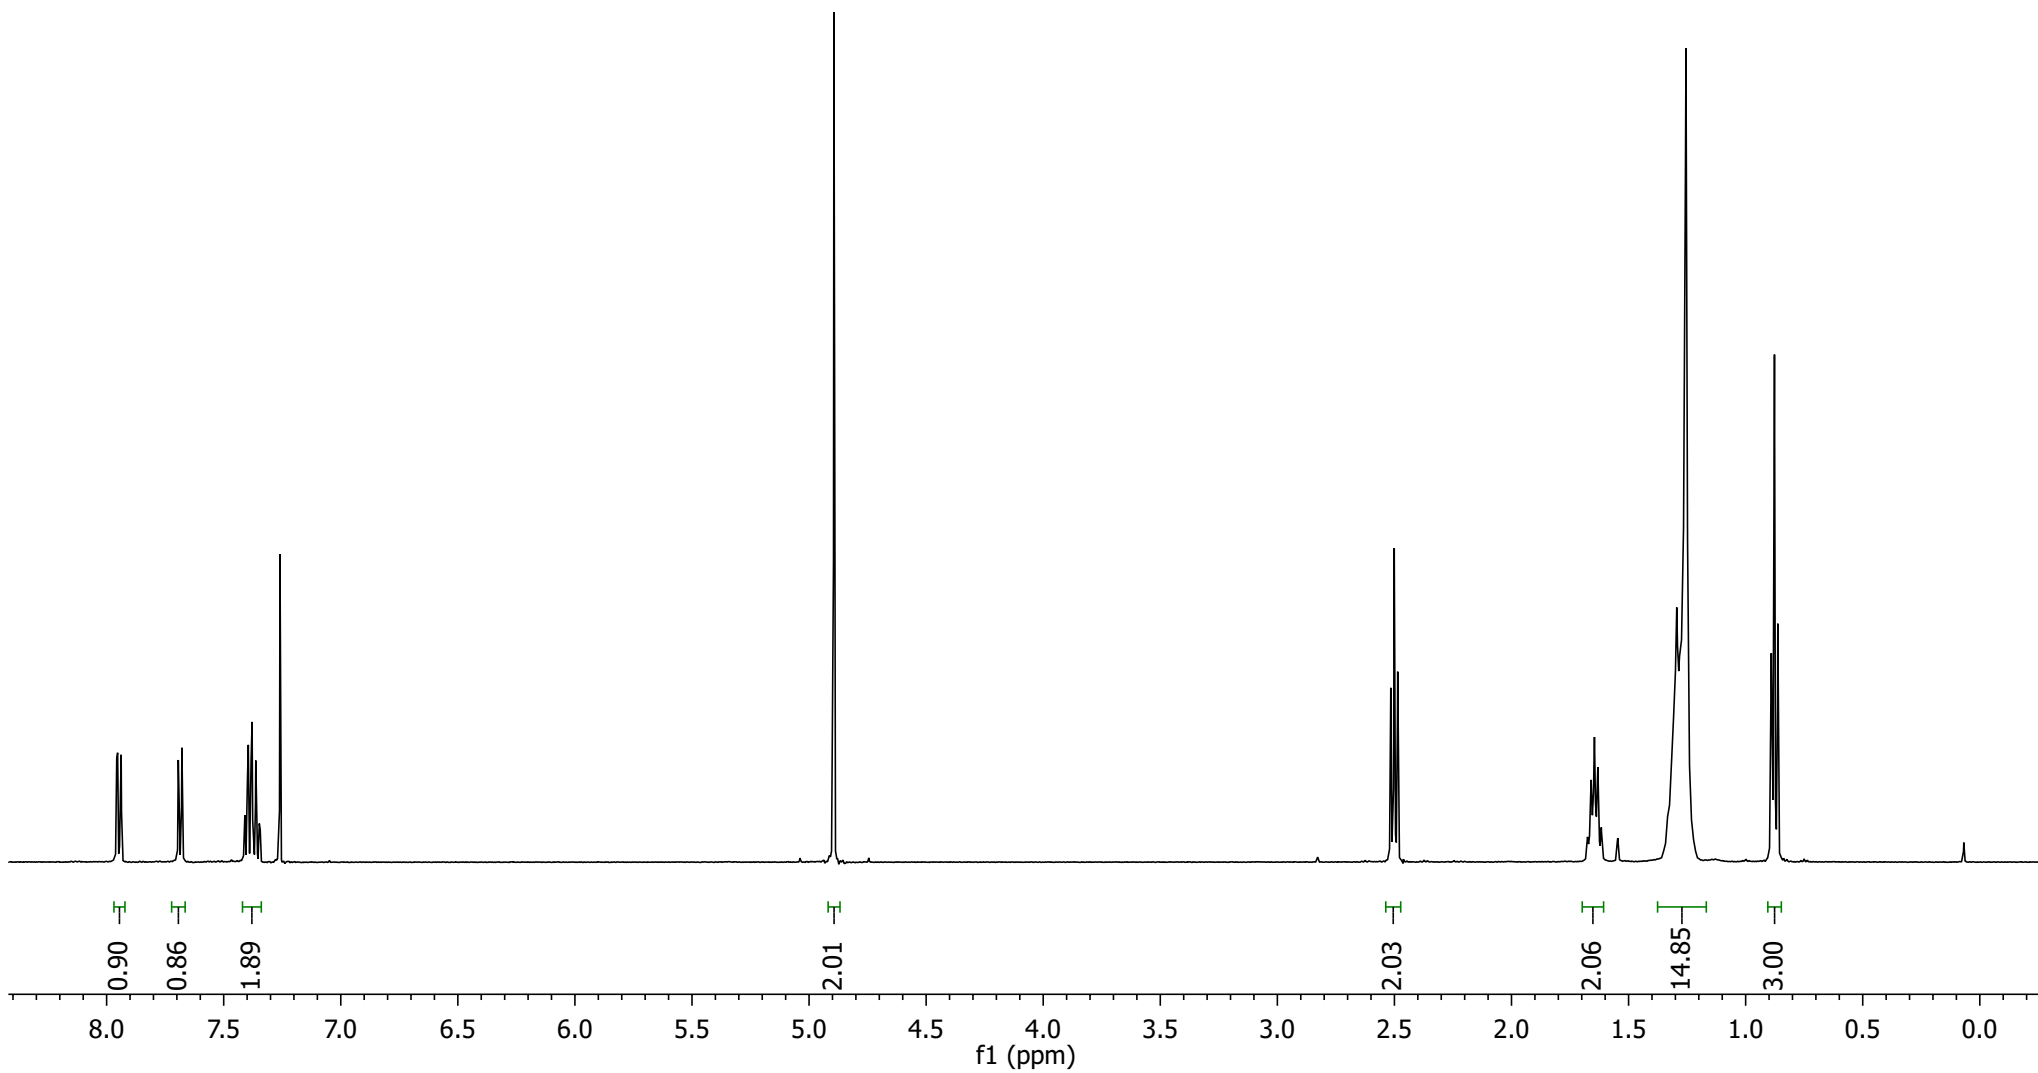



Title zhaoyl-1-89-1-C  
Solvent CDCl3  
Spectrometer Frequency 125.70

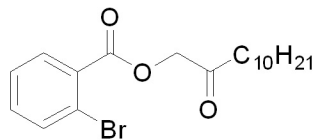

203.58

165.26

134.44

132.98

131.82

131.12

127.23

121.99

68.60

38.99

29.41

29.33

29.15

23.27

22.67

14.10

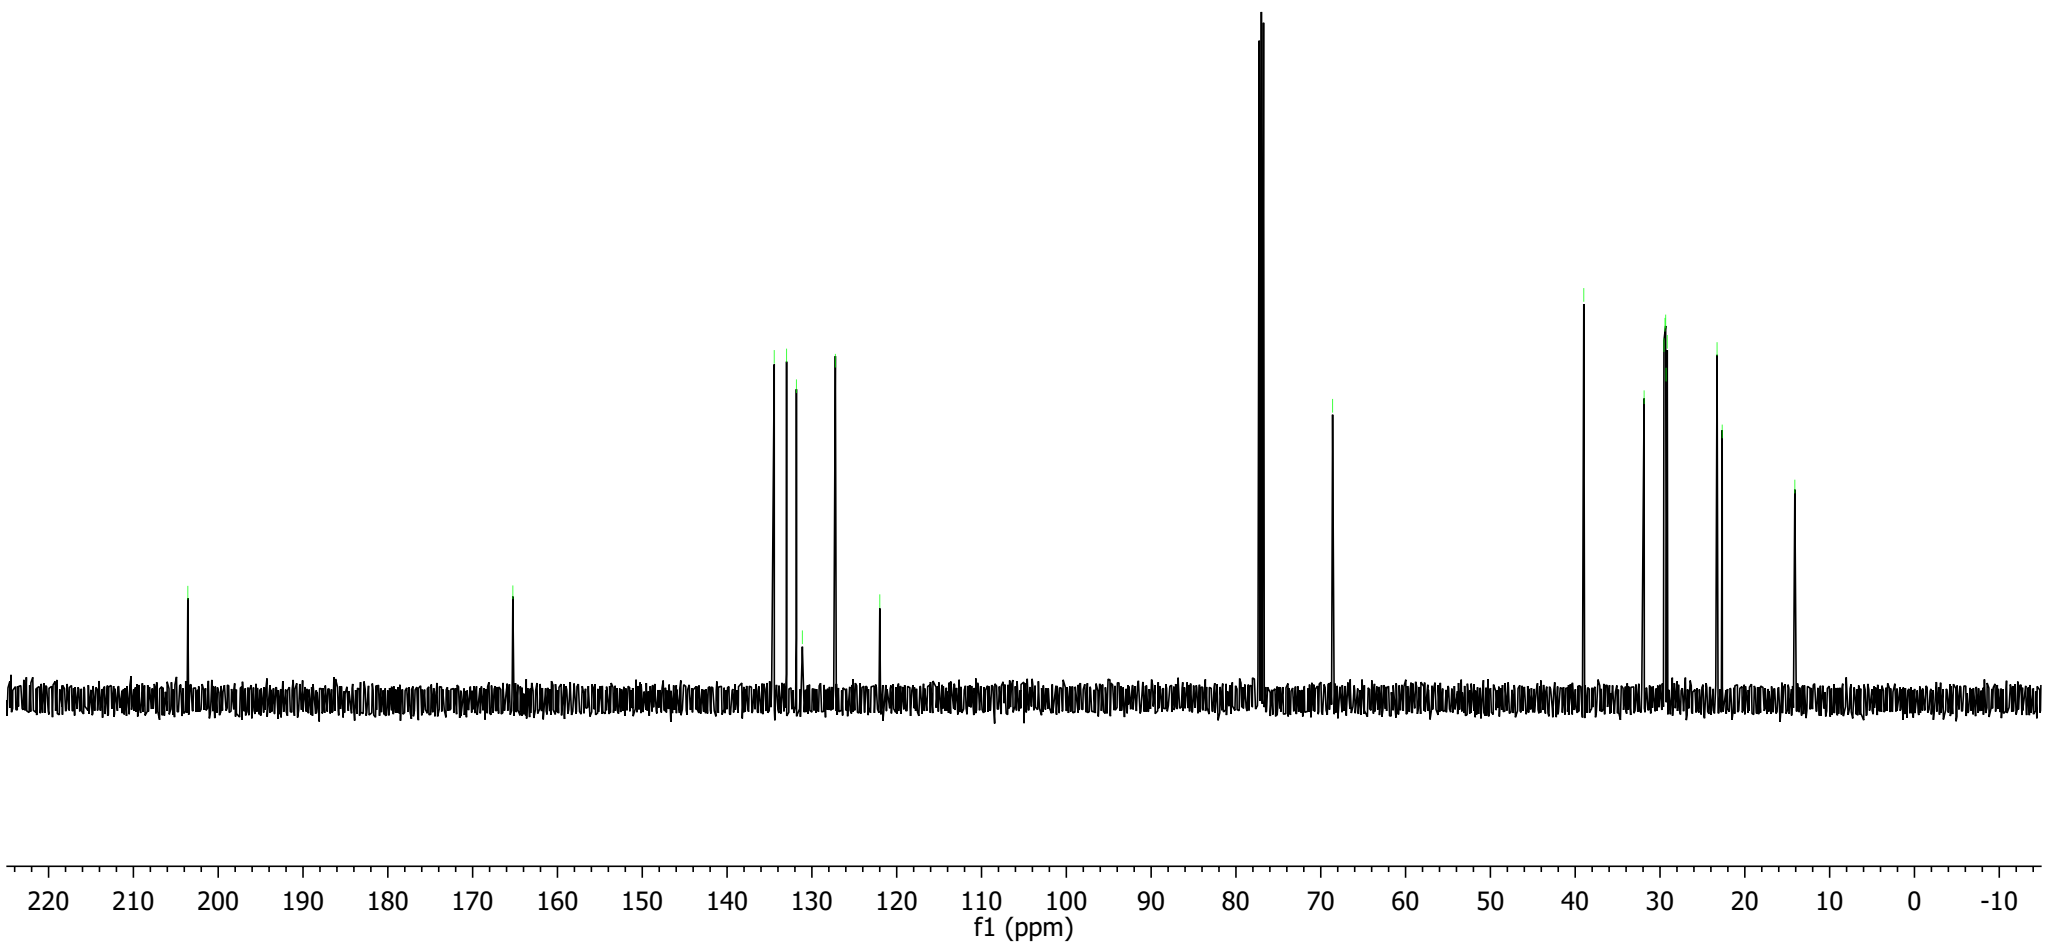

Title zhaoyl-1-92  
Solvent CDCl3  
Spectrometer Frequency 499.86

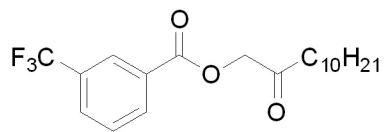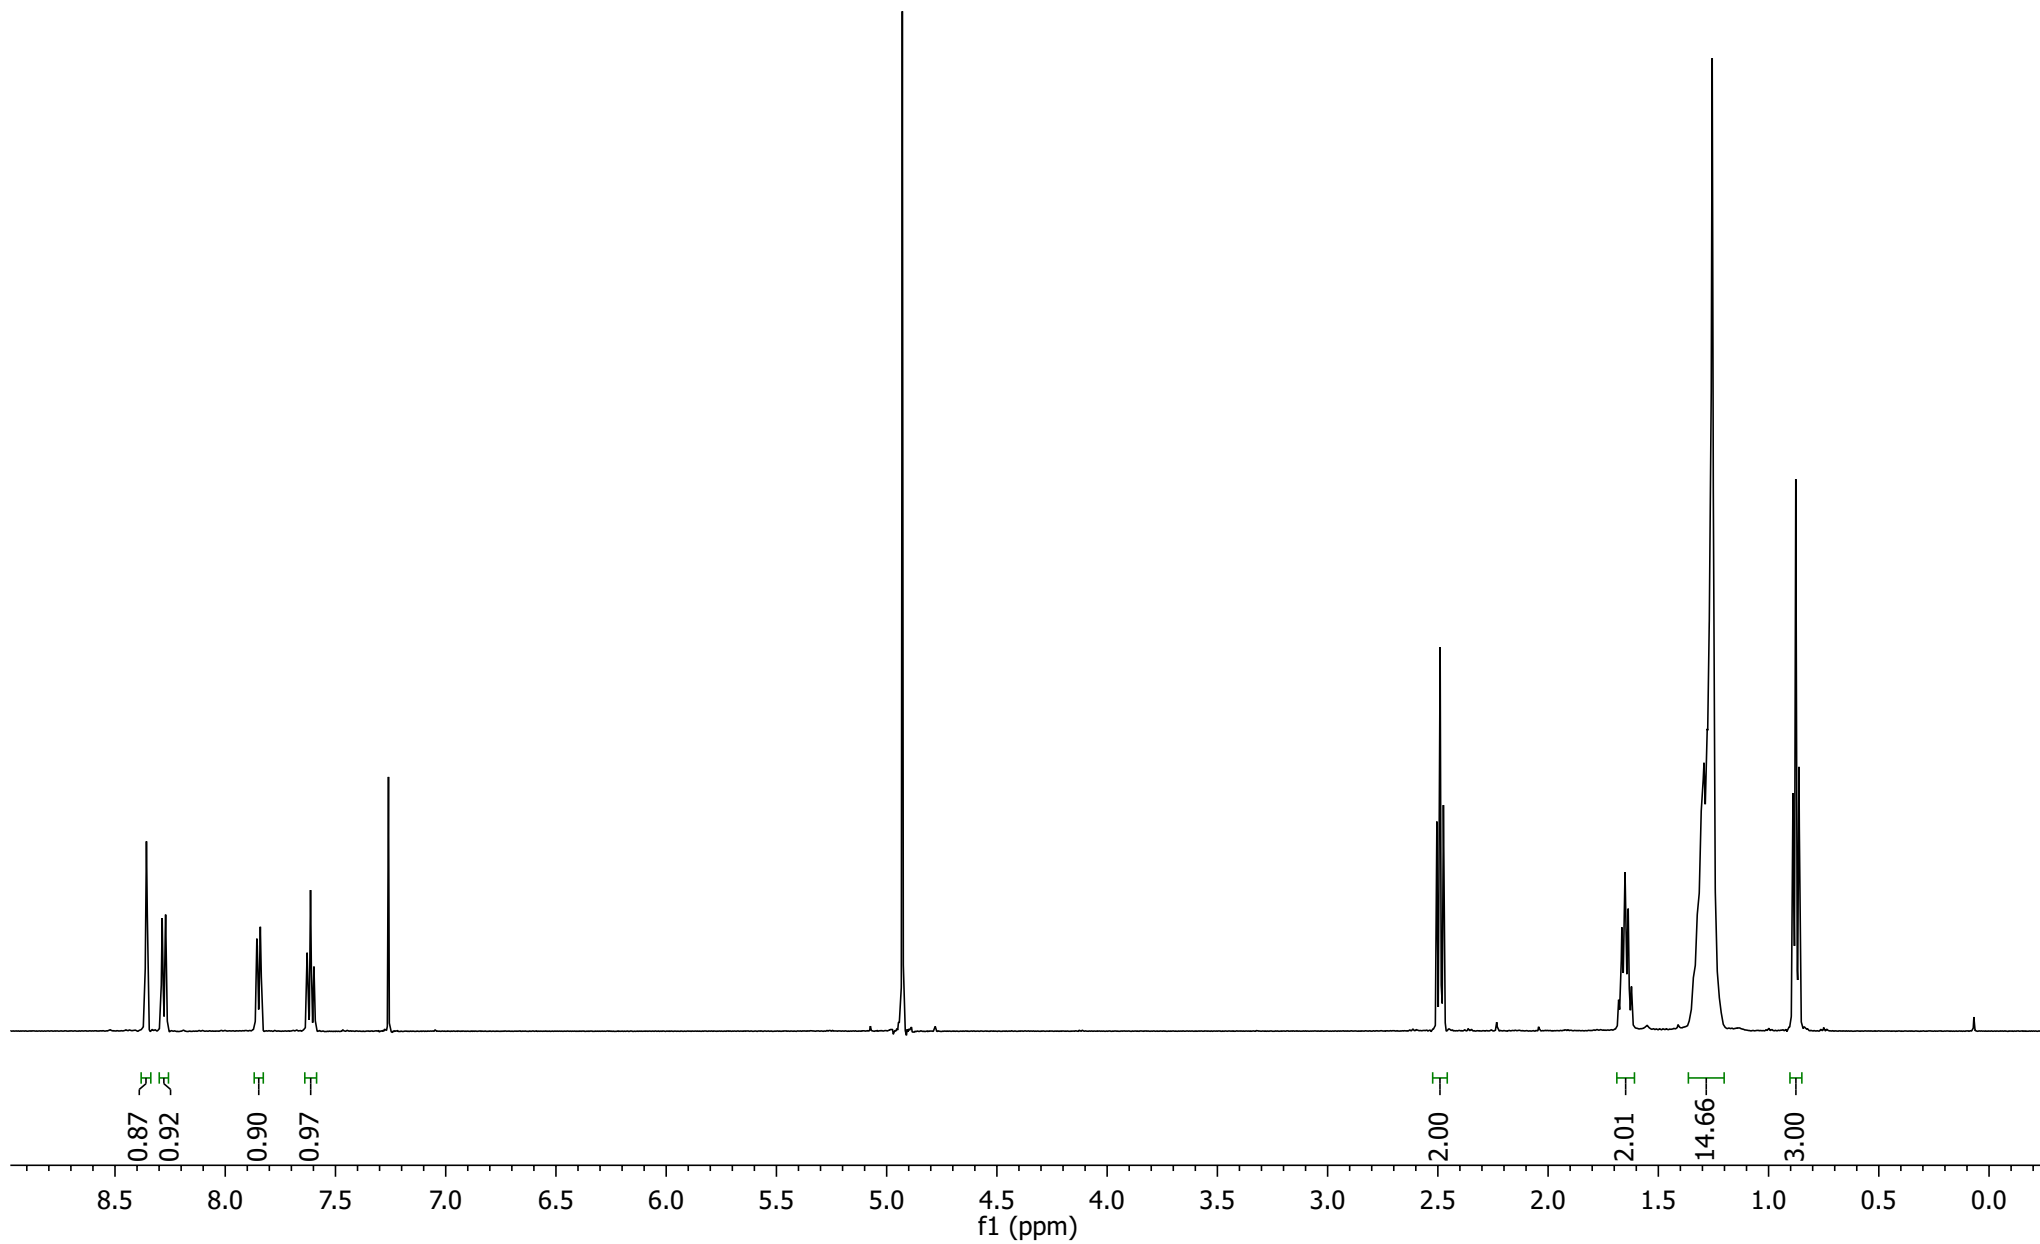

Title zhaoyl-1-92-C-1  
Solvent CDCl3  
Spectrometer Frequency 125.70

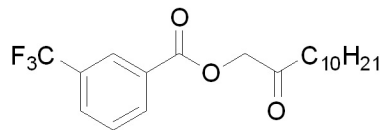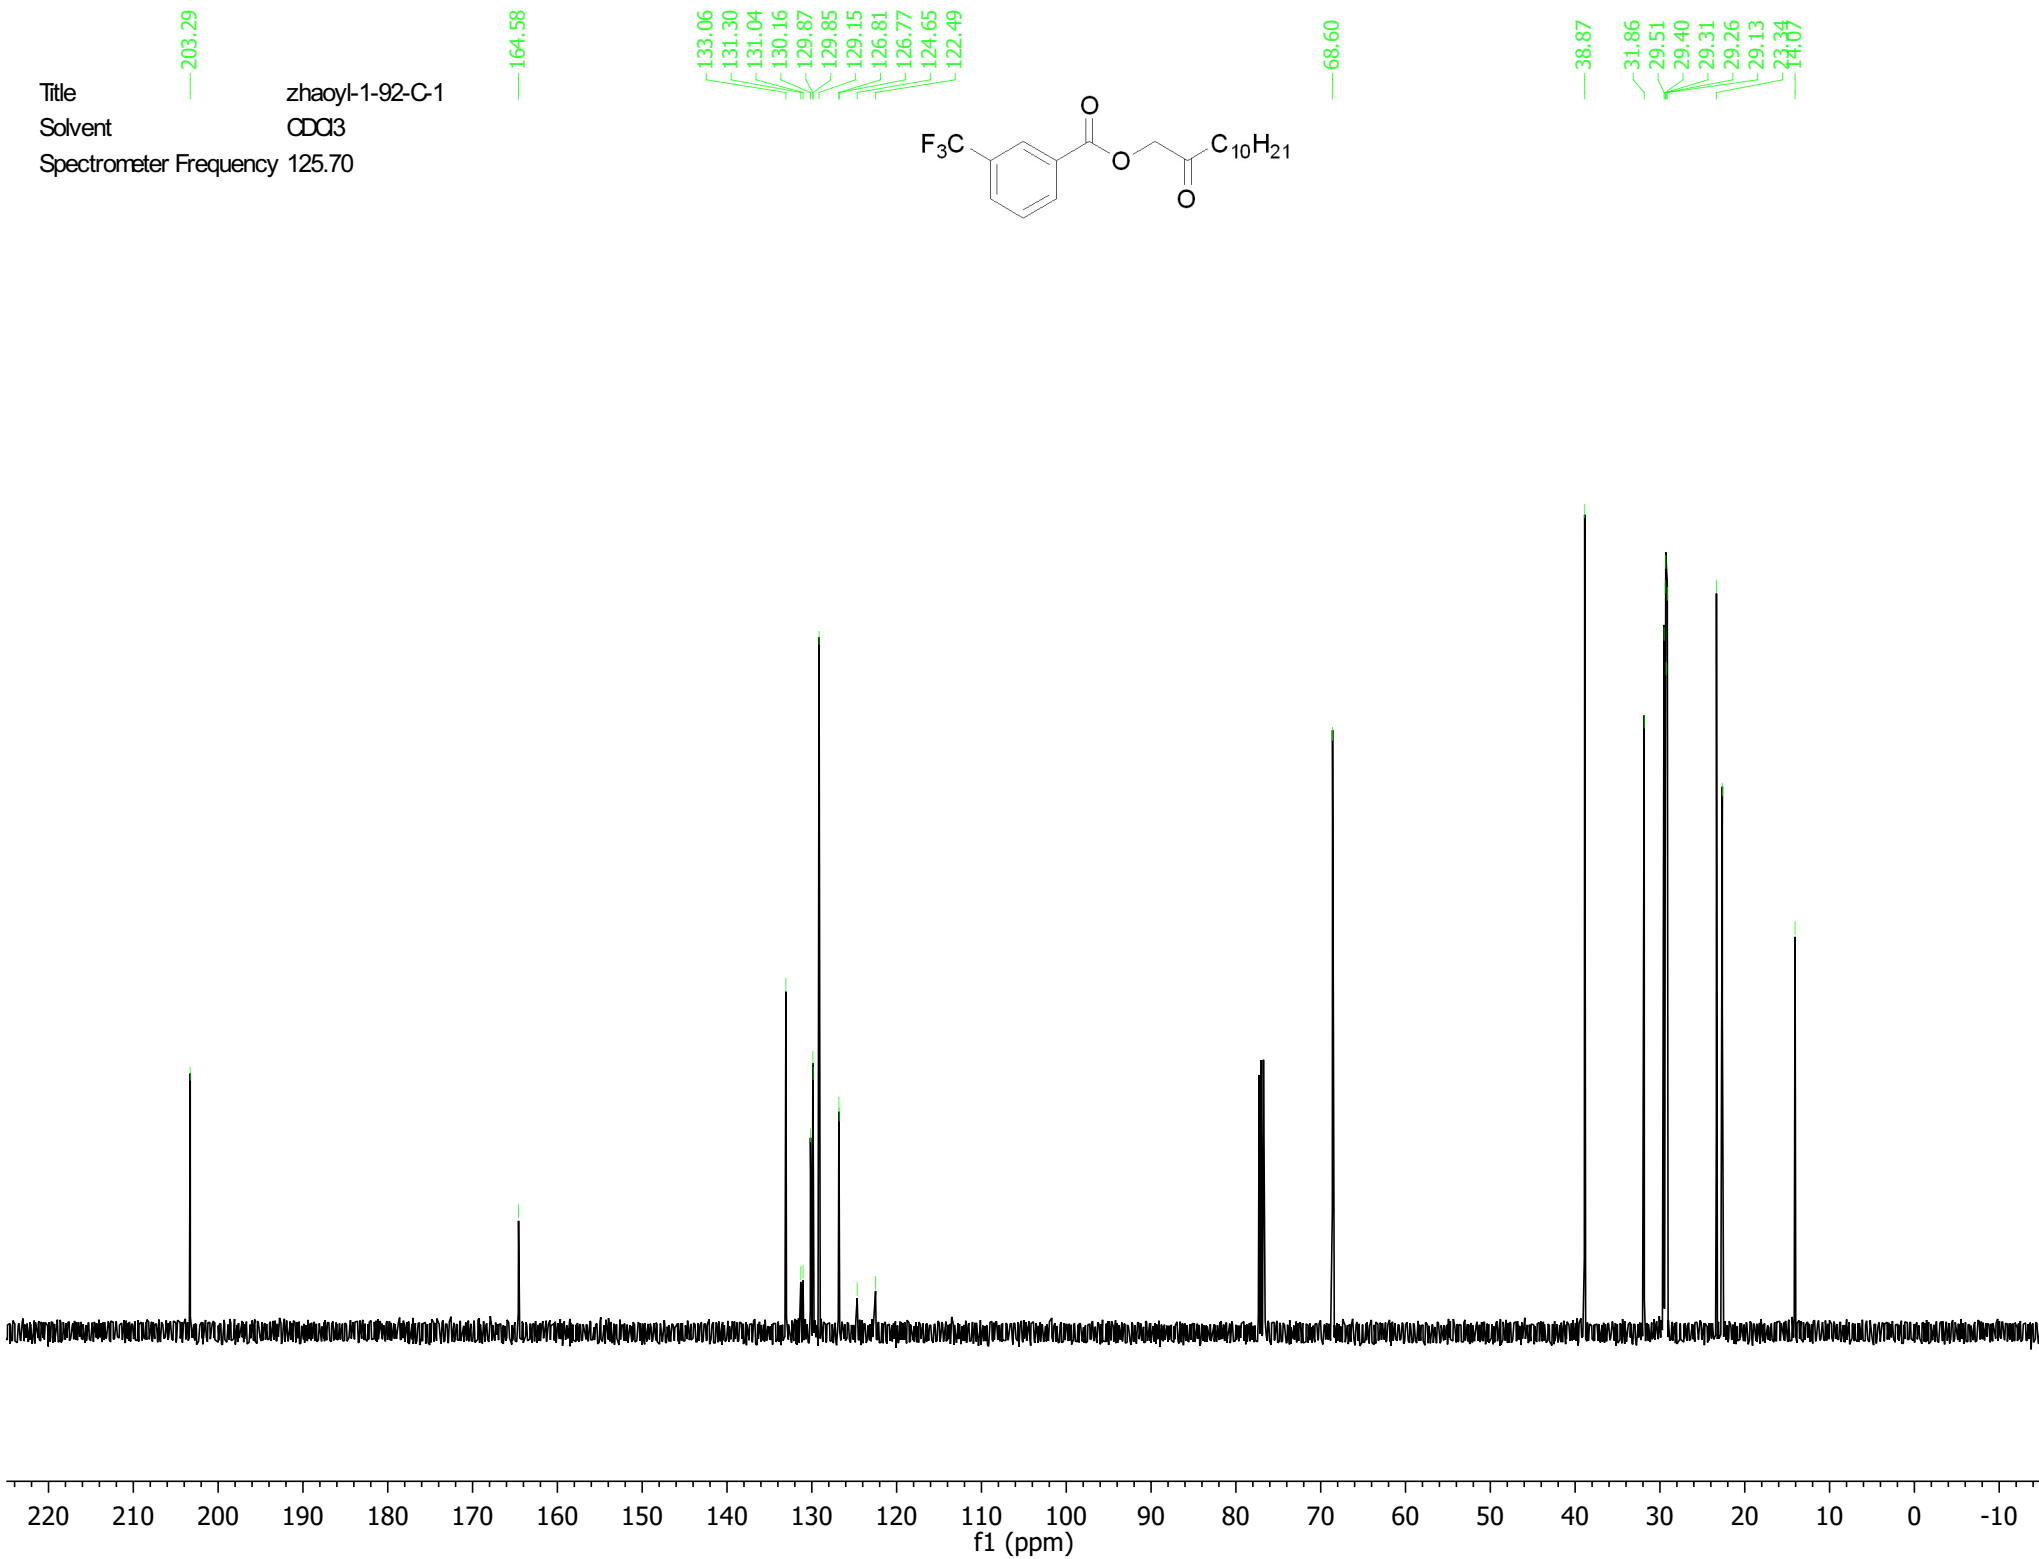

Title zhaoyl-1-91-8  
Solvent CDCl3  
Spectrometer Frequency 499.86

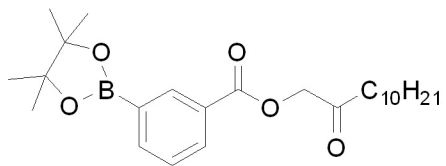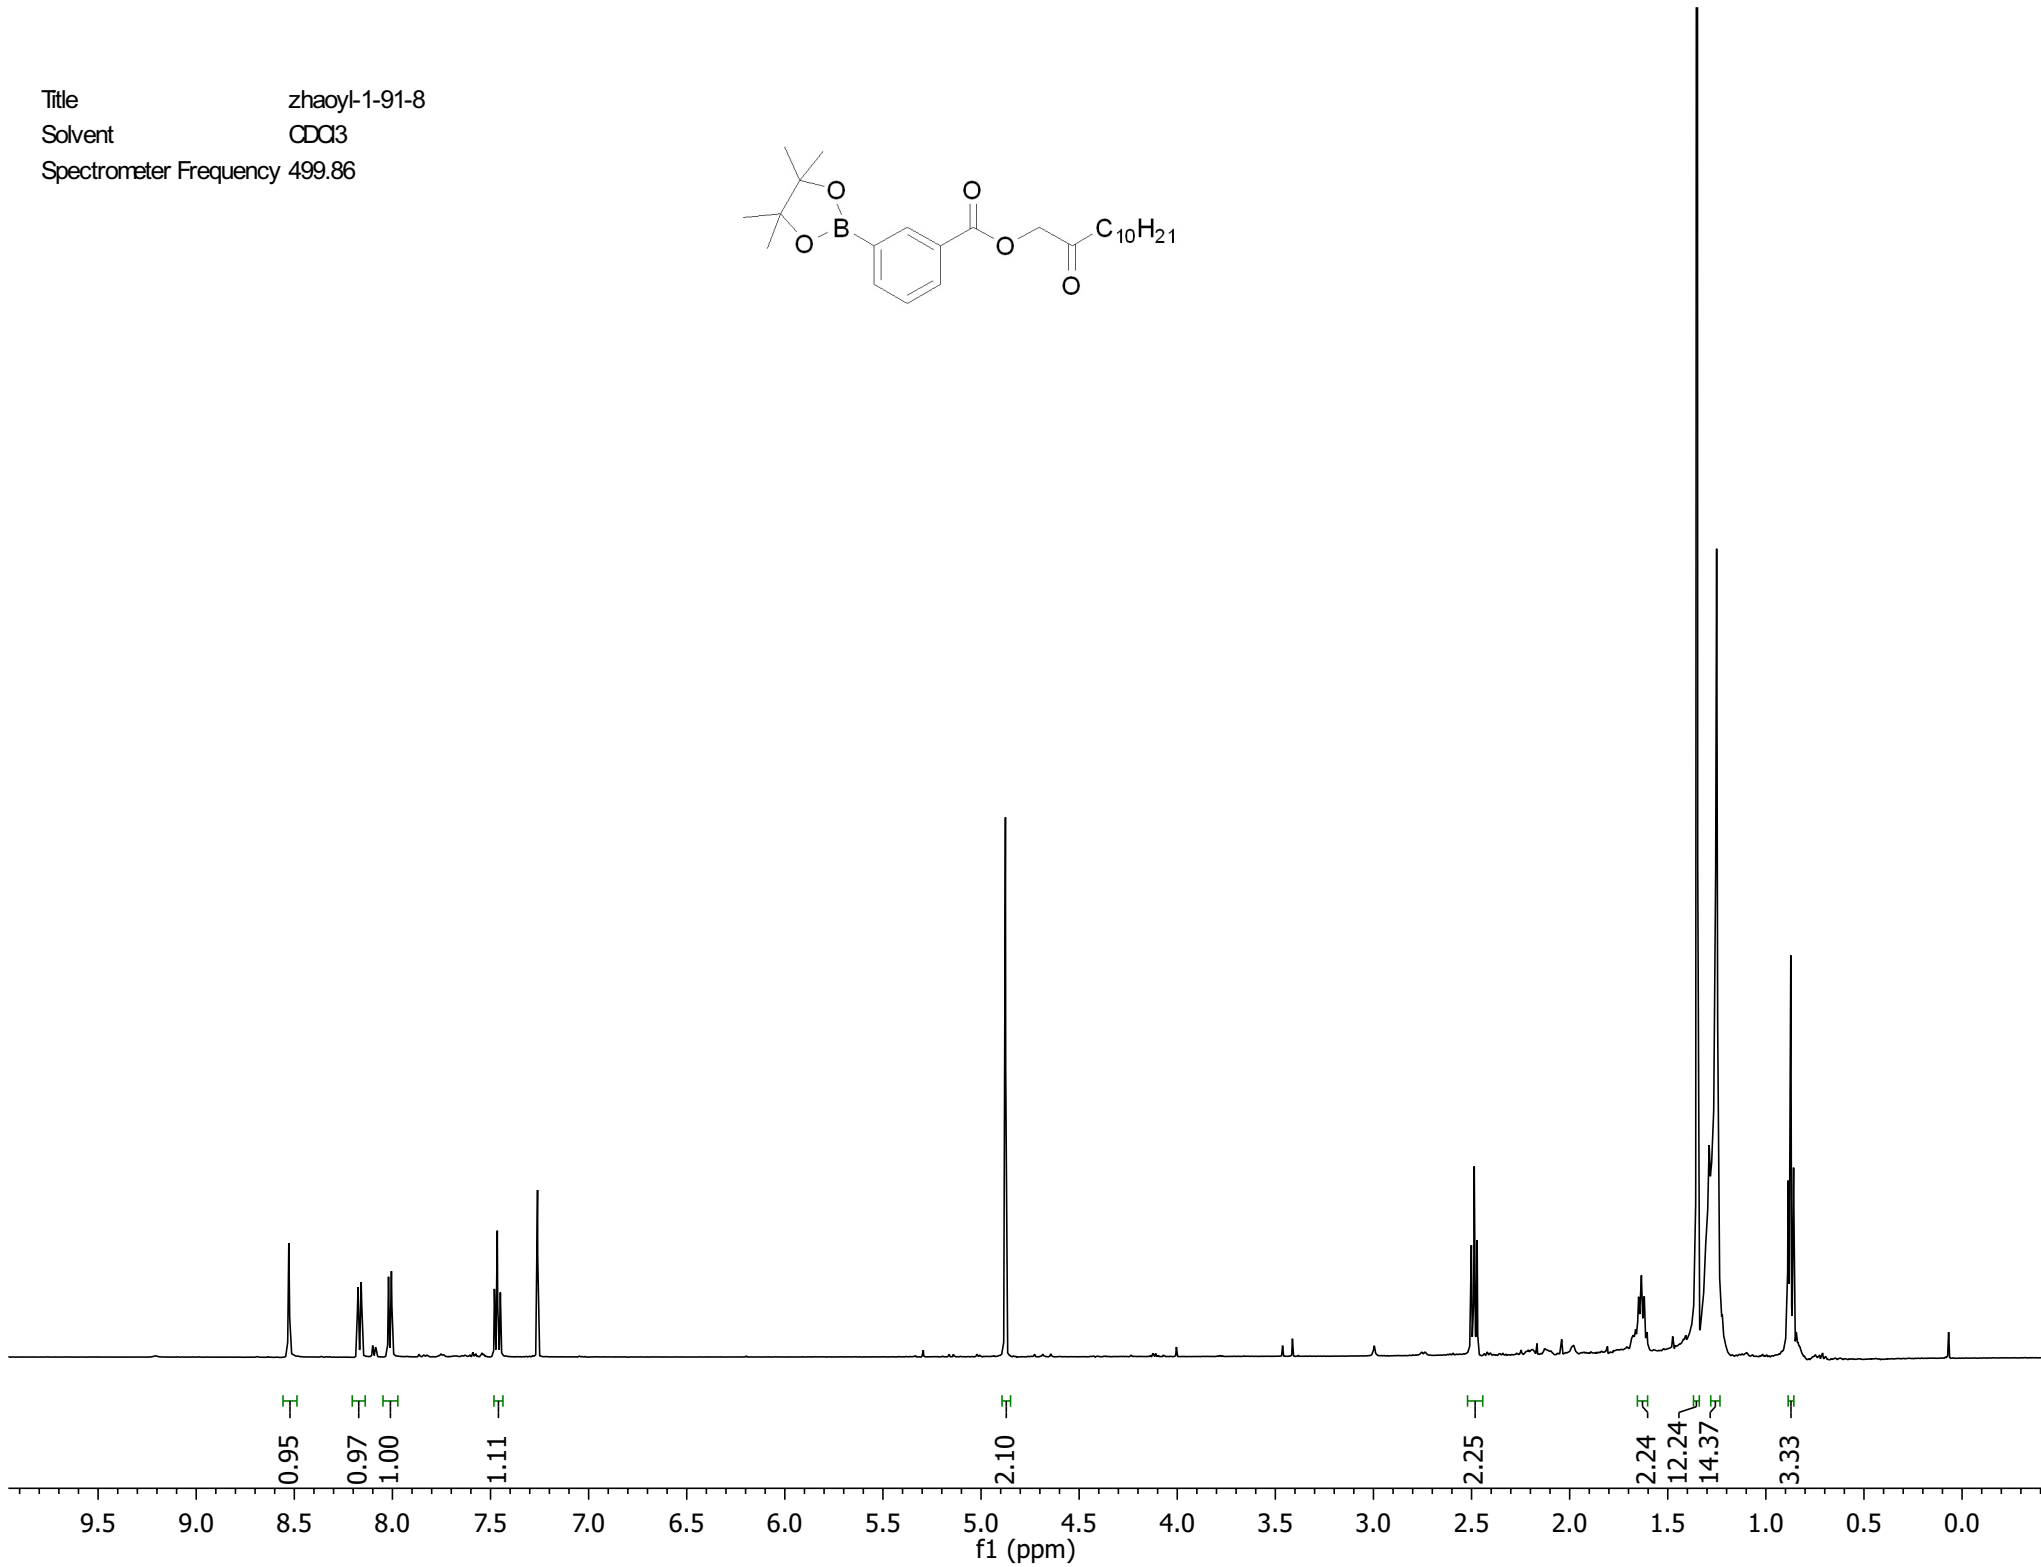

Title zhaoyl-1-91-8-C  
Solvent CDCl3  
Spectrometer Frequency 125.70

204.26

165.94

139.60

136.17

132.53

128.64

128.44

127.87

84.10

68.36

38.89

29.52

29.41

29.33

29.27

29.14

24.86

17.09

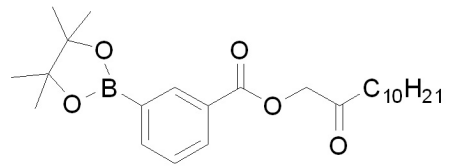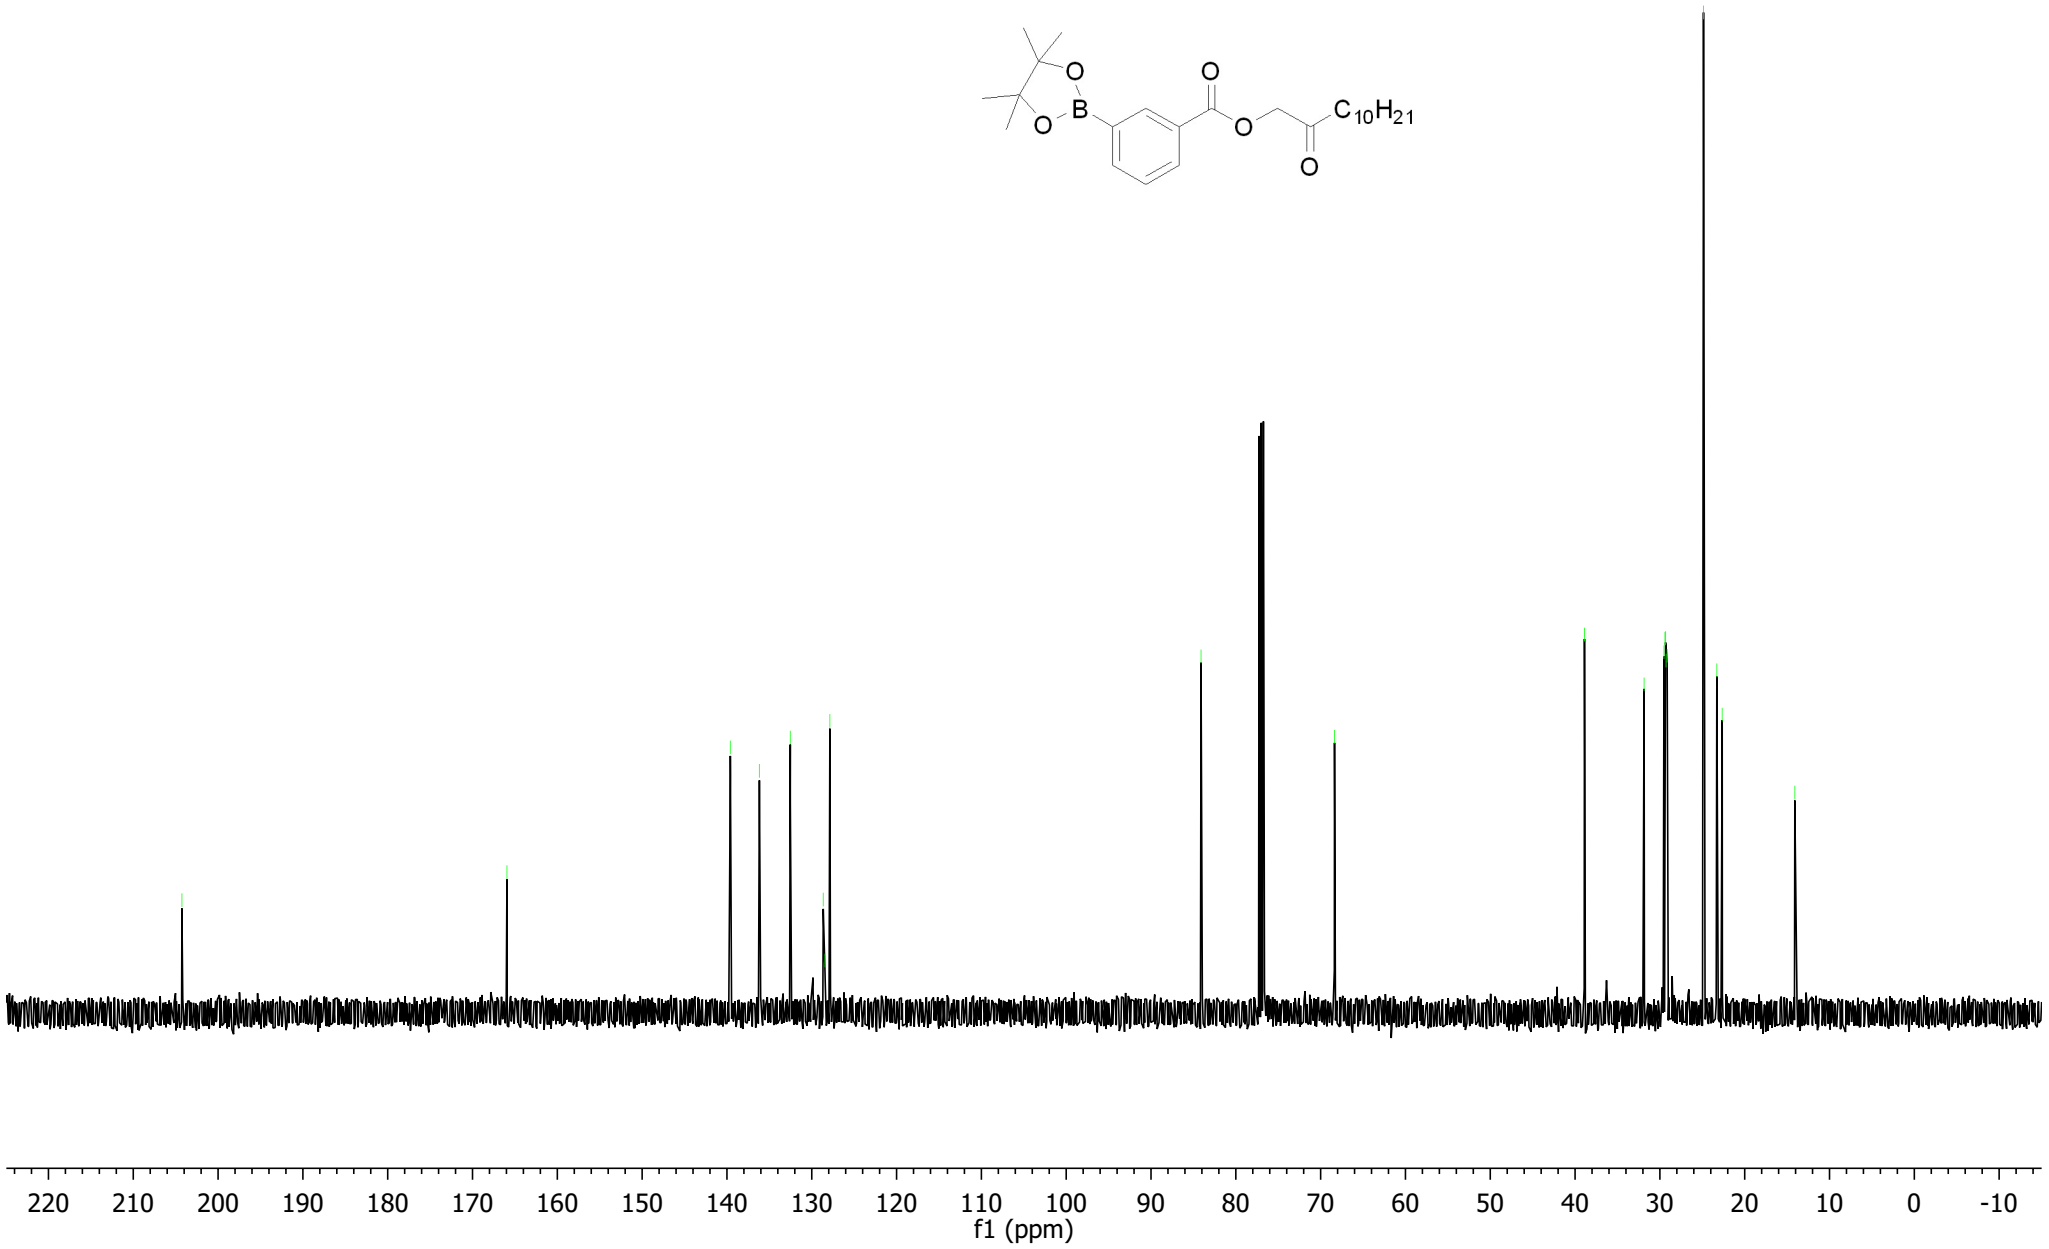

Title zhaoyl-1-126-1  
Solvent CDCl3  
Number of Scans 8  
Relaxation Delay 5.0000  
Acquisition Date 2013-03-31T15:34:42  
Spectrometer Frequency 499.86

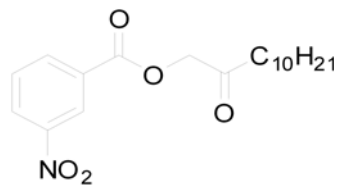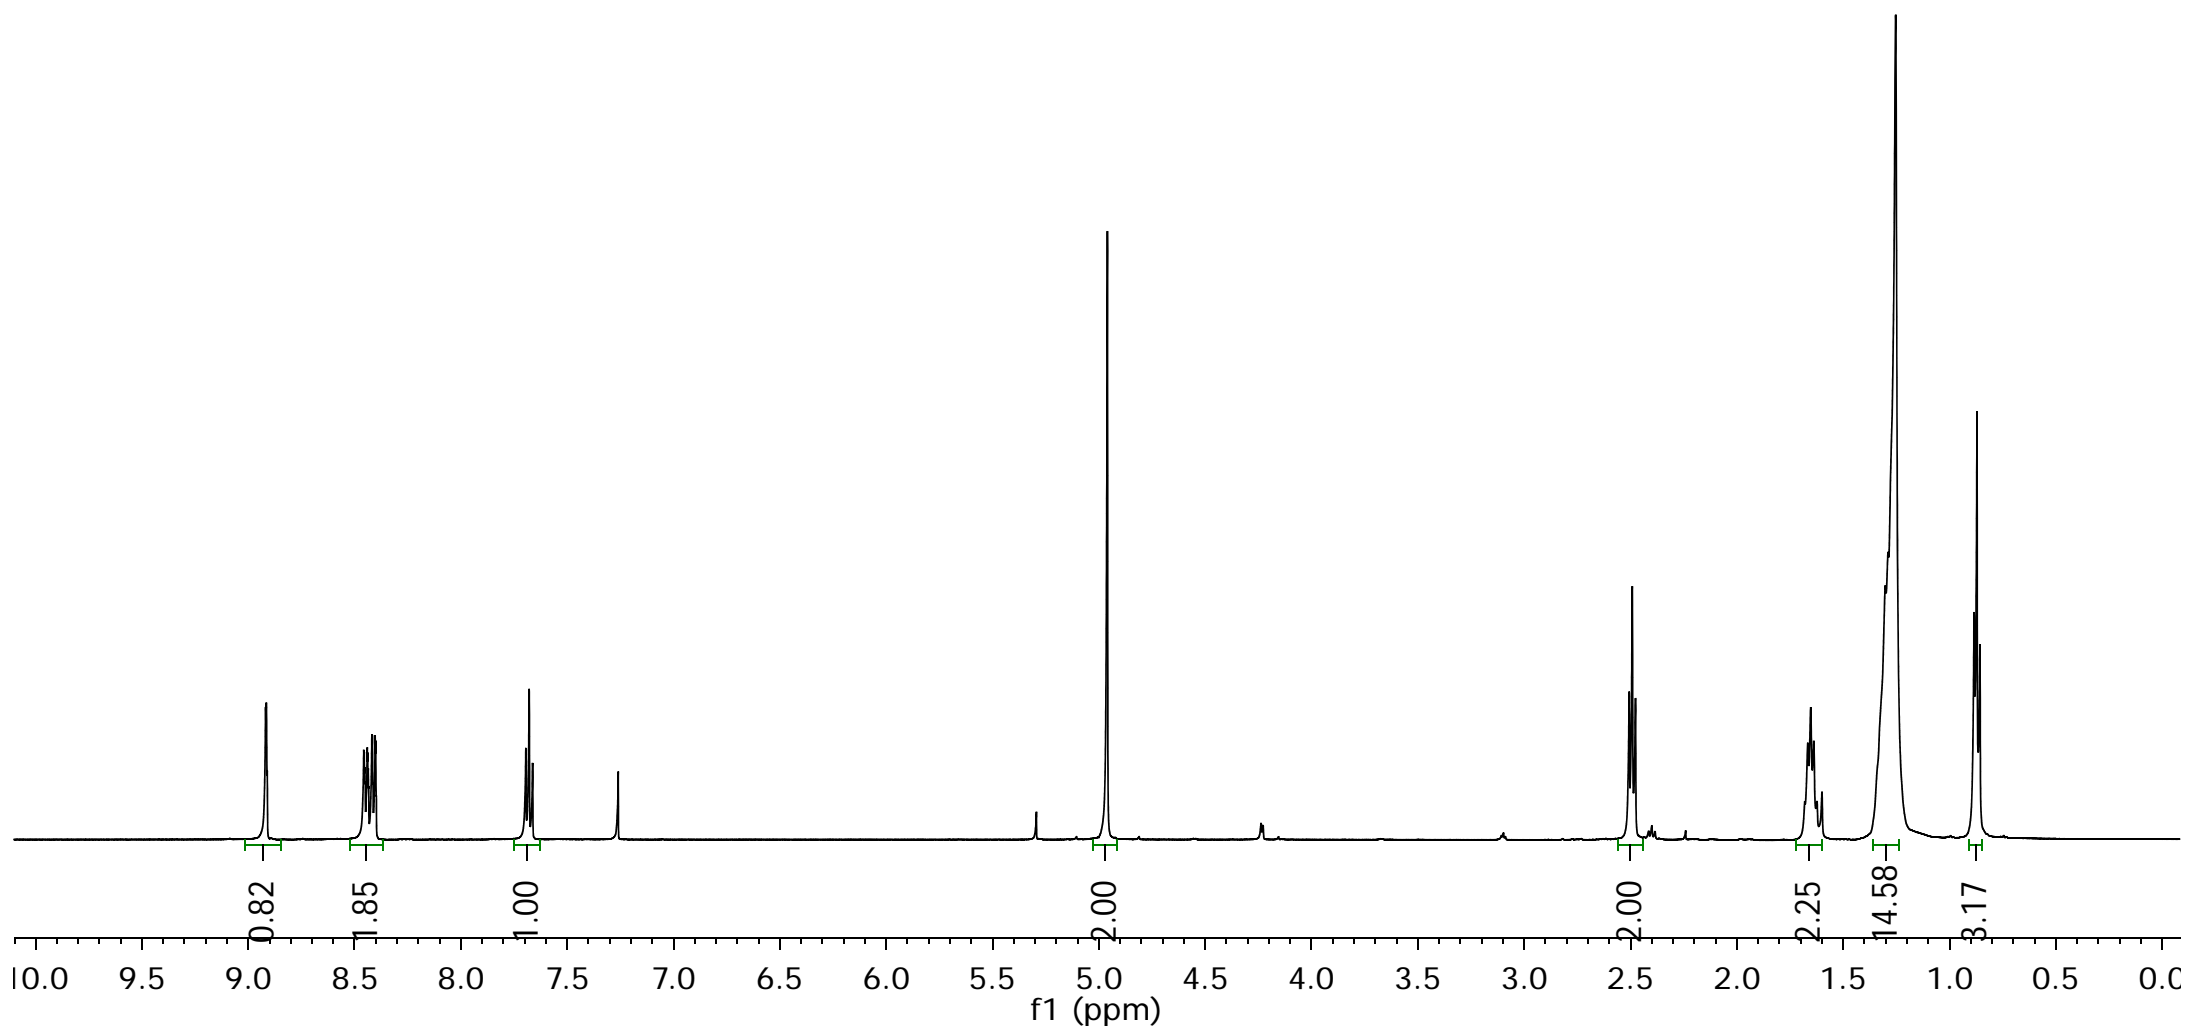

Title zhaoyl-1-126-1-C13  
Solvent CDCl3  
Number of Scans 124  
Relaxation Delay 1.0000  
Acquisition Date 2013-03-31T15:37:03  
Spectrometer Frequency 125.70

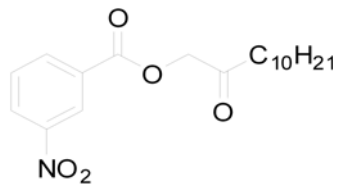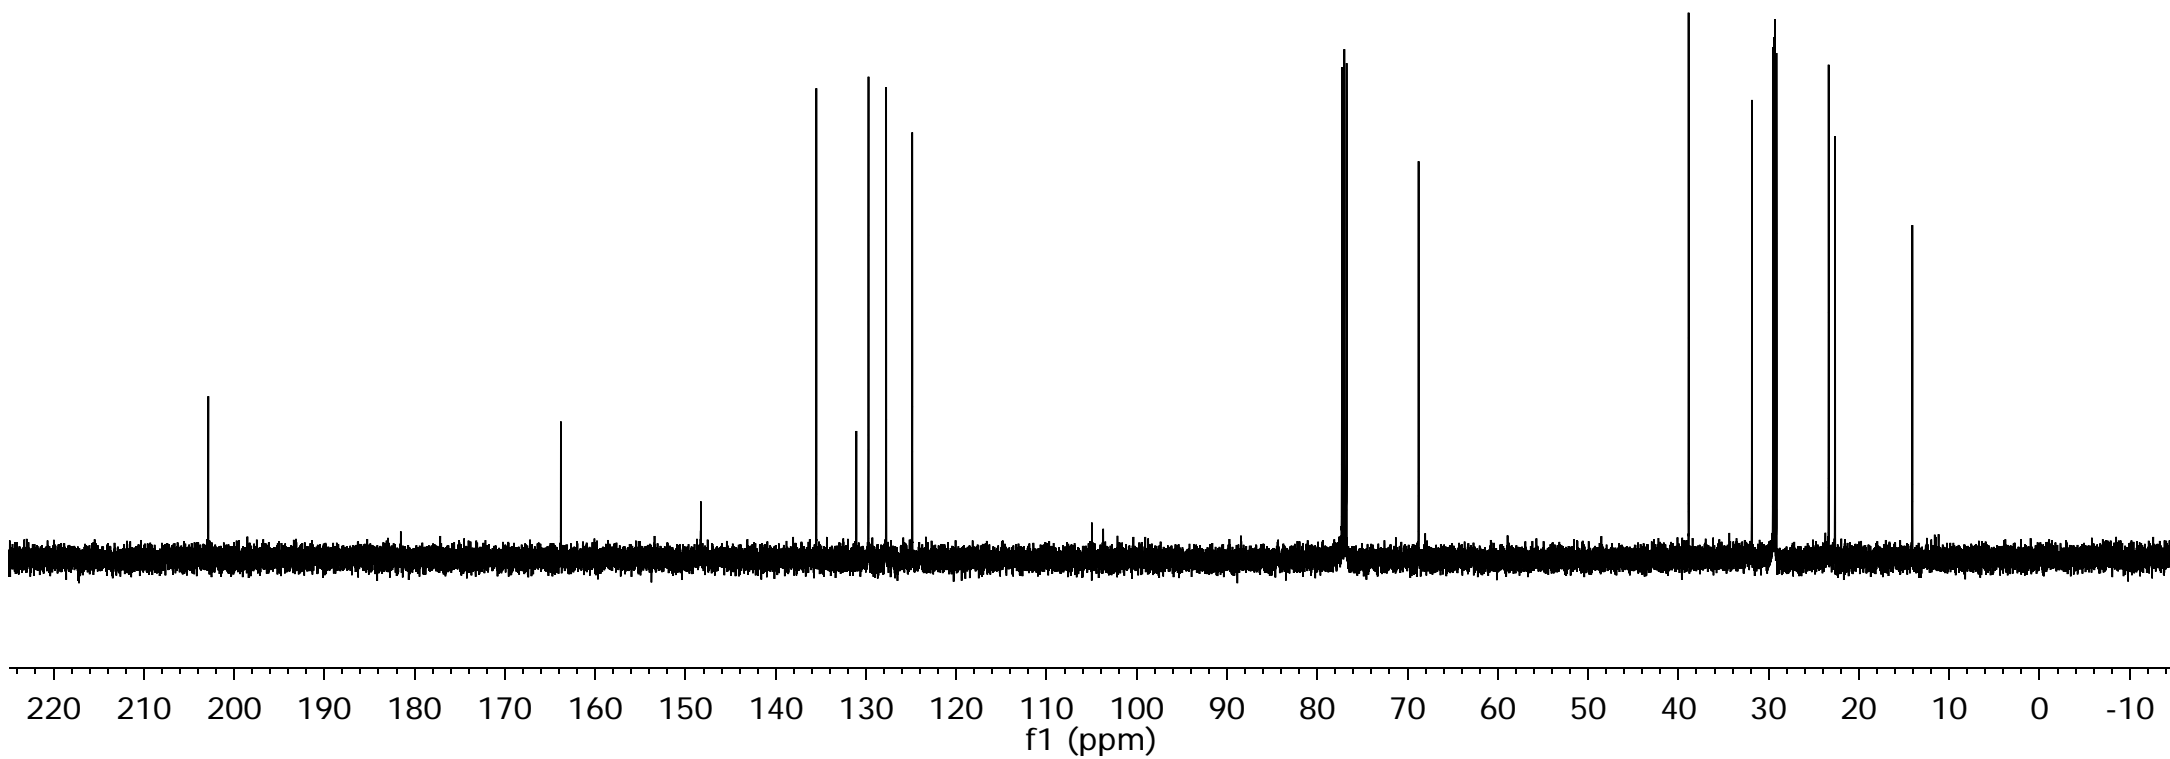

Title zhaoyl-1-90  
Solvent CDCl3  
Spectrometer Frequency 499.86

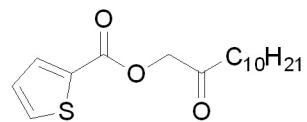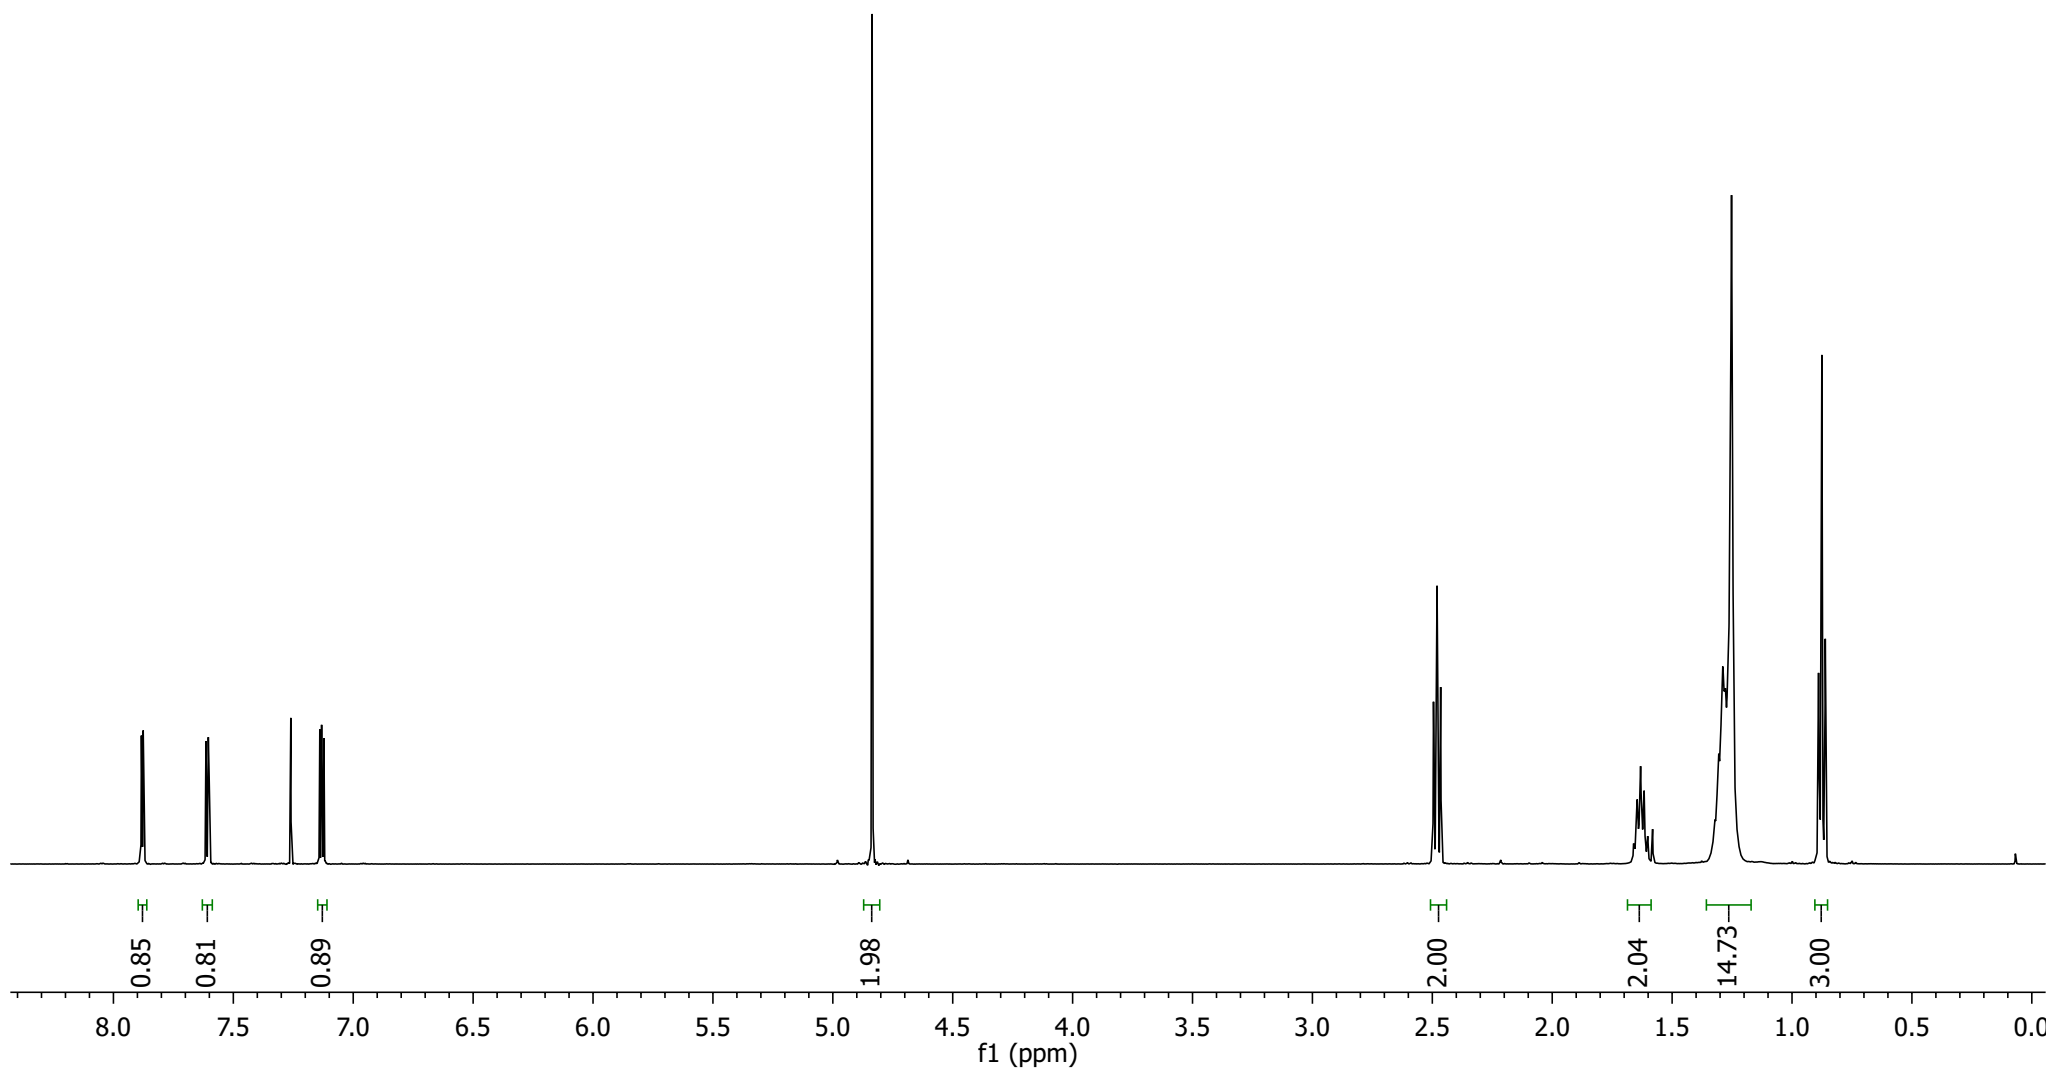



Title zhaoyl-1-90-C13  
Solvent CDCl3  
Spectrometer Frequency 125.70

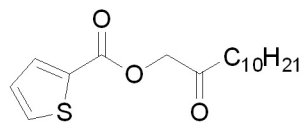

204.02

161.38

134.25

133.09

132.50

127.89

68.34

38.88

29.40

29.33

29.14

23.27

22.66

14.10

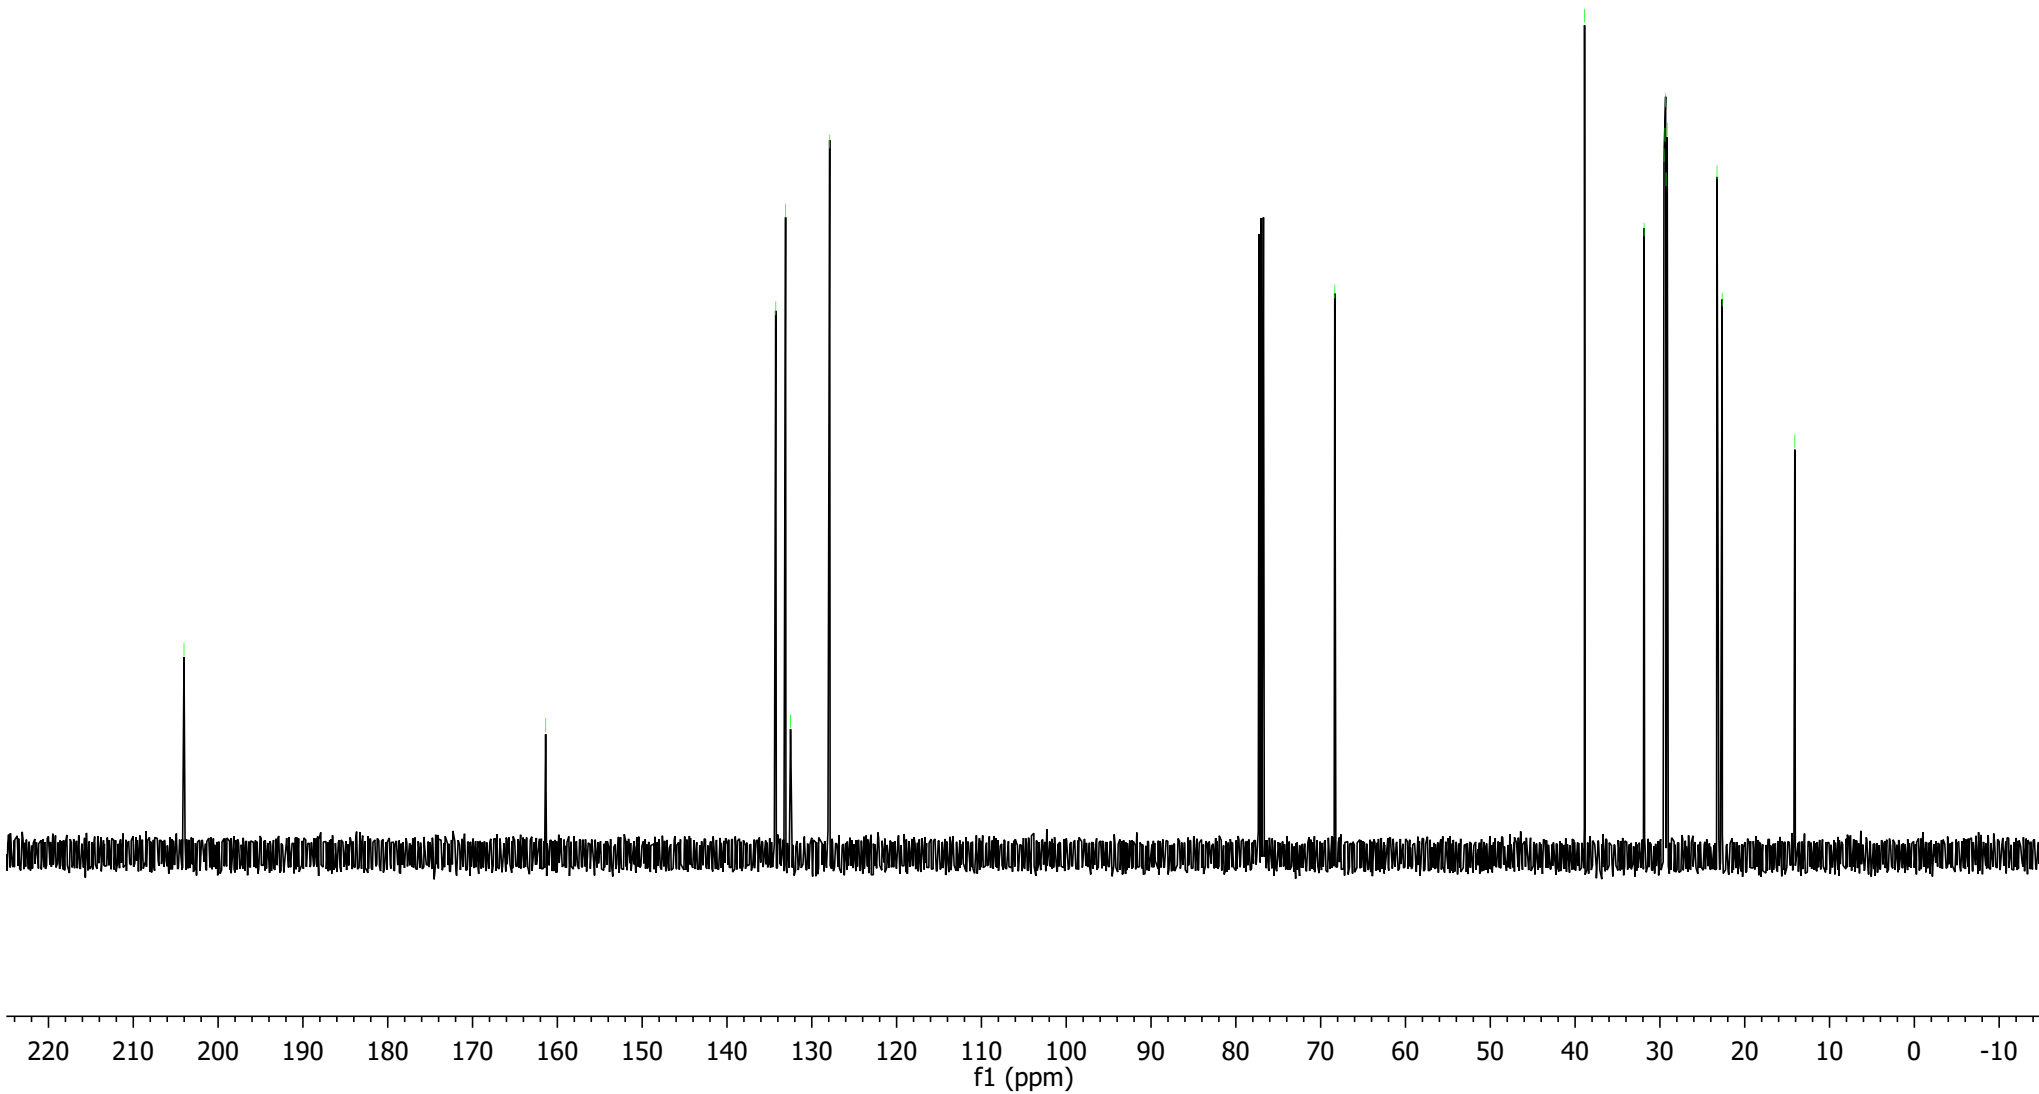

Title zhaoyl-1-85  
Solvent CDCl3  
Spectrometer Frequency 499.86

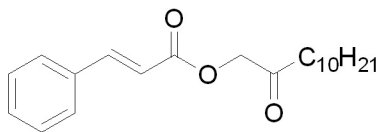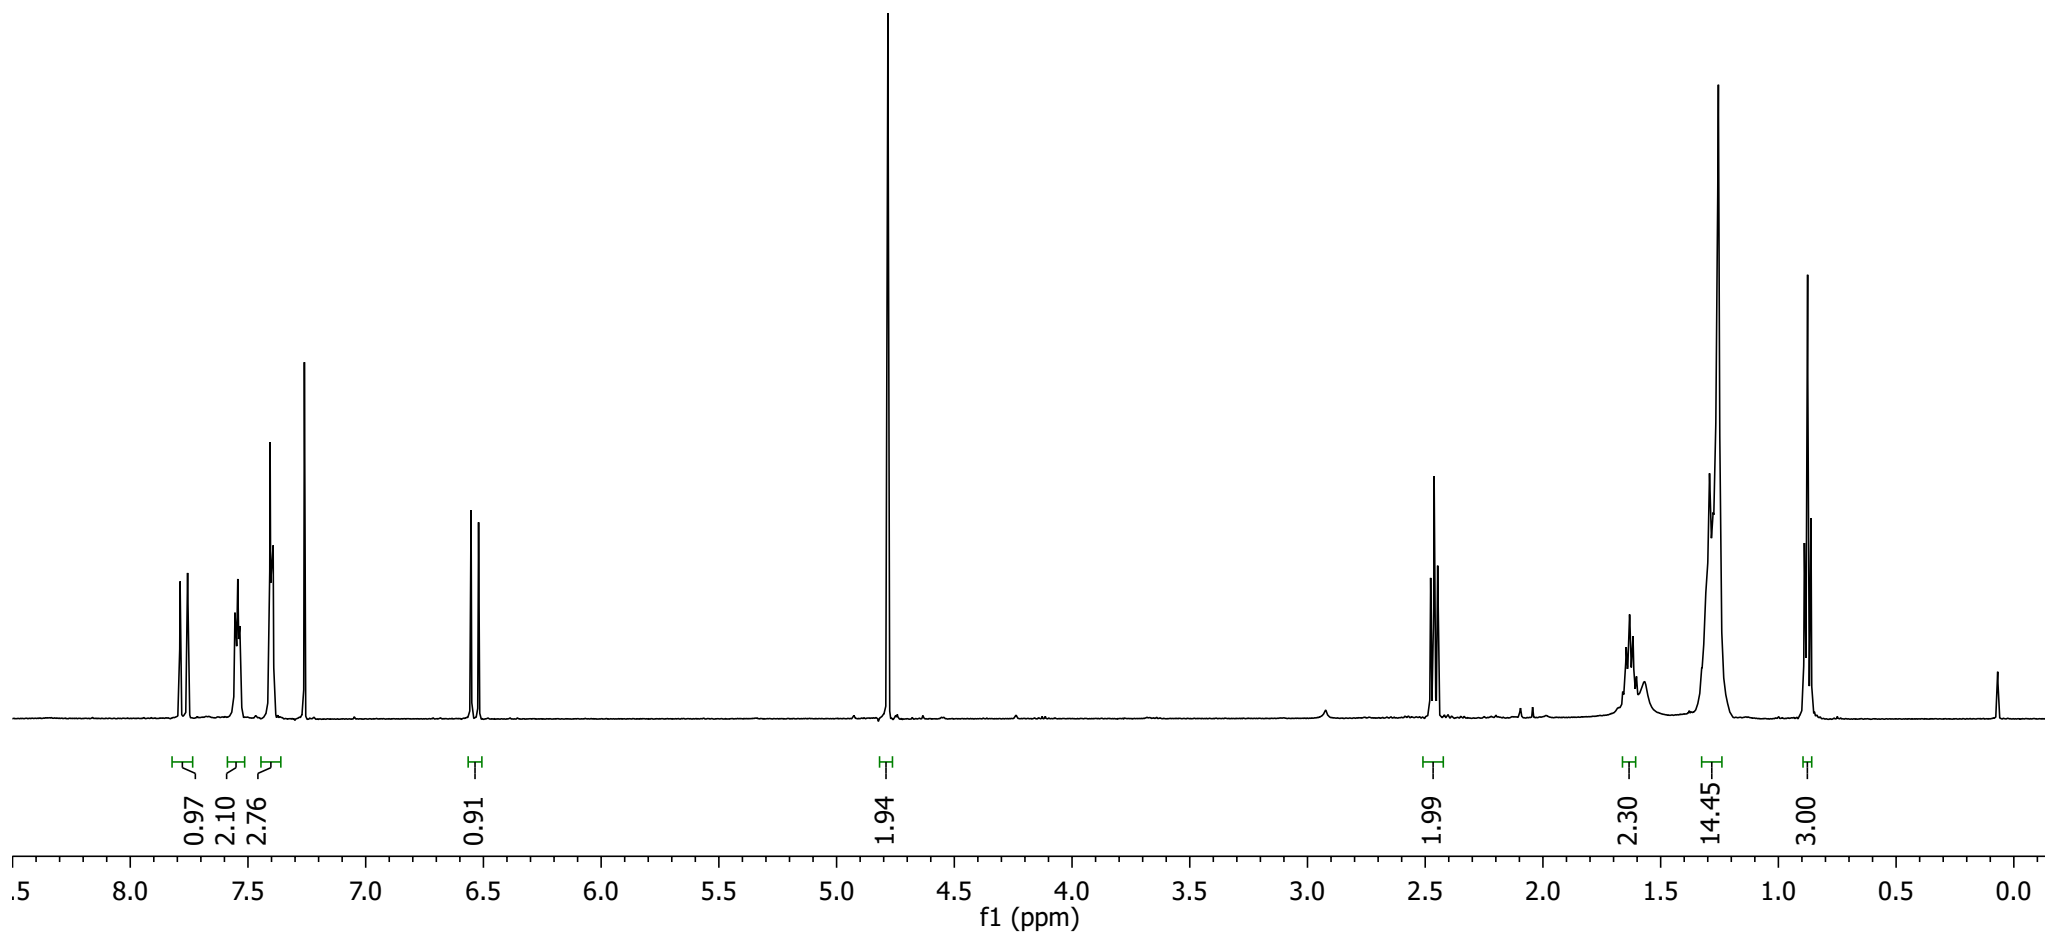

Title zhaoyl-1-85-C  
Solvent CDCl3  
Spectrometer Frequency 125.70

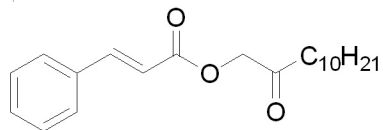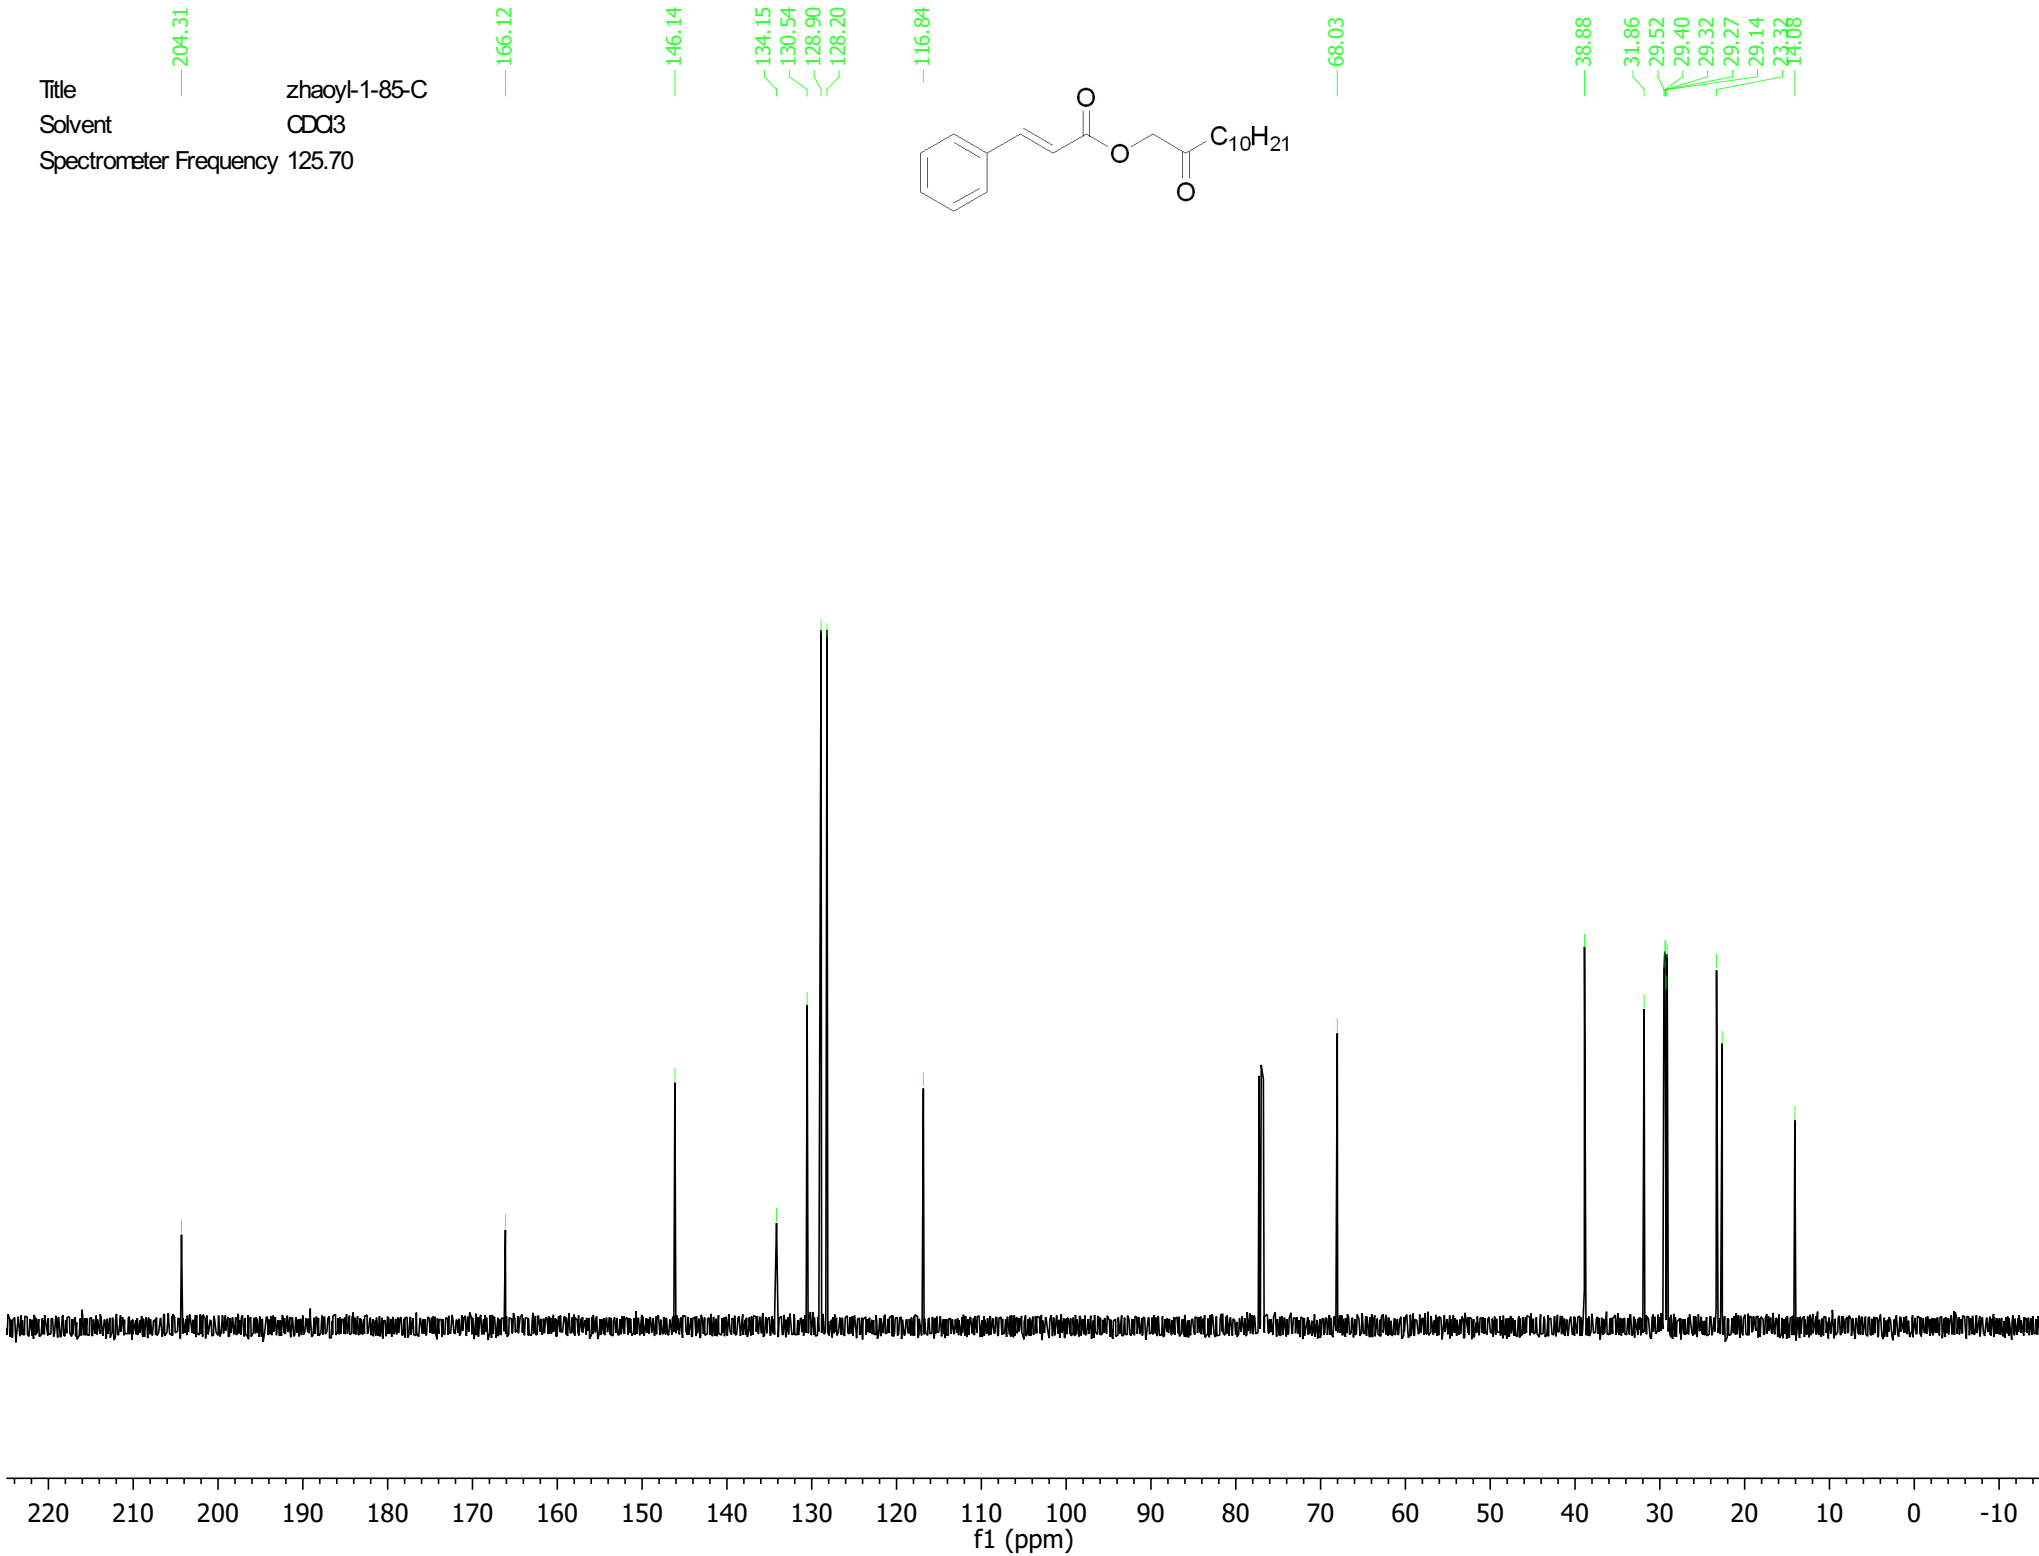

Title zhaoyl-1-82  
Solvent CDCl3  
Spectrometer Frequency 499.86

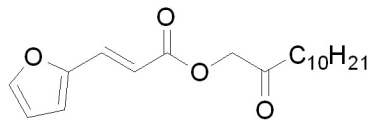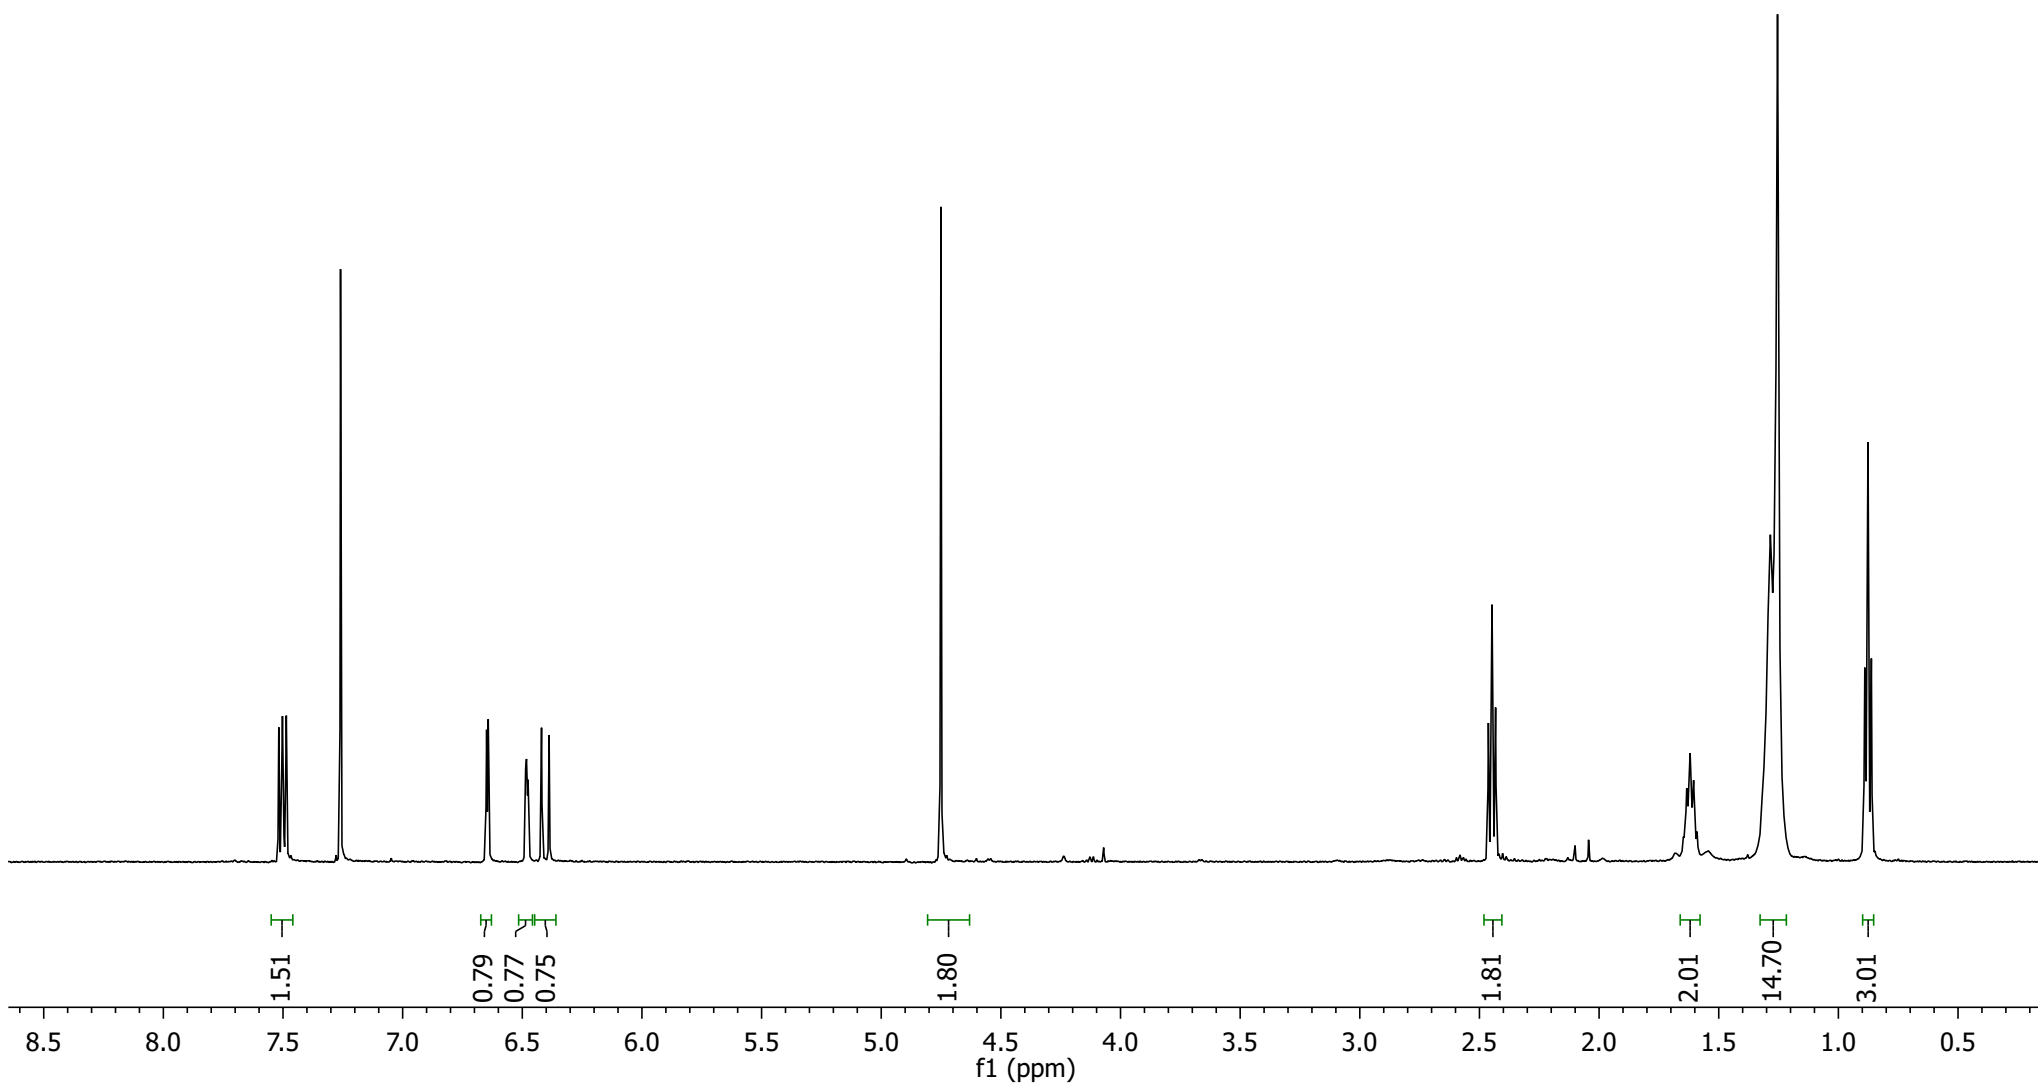

Title zhaoyl-1-82-C  
Solvent CDCl3  
Spectrometer Frequency 125.70

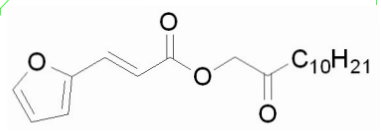

204.43 166.18 150.73 145.04 132.23 115.39 114.42 112.36 68.02 38.86 31.86 29.52 29.41 29.32 29.27 29.13 27.08 14.08

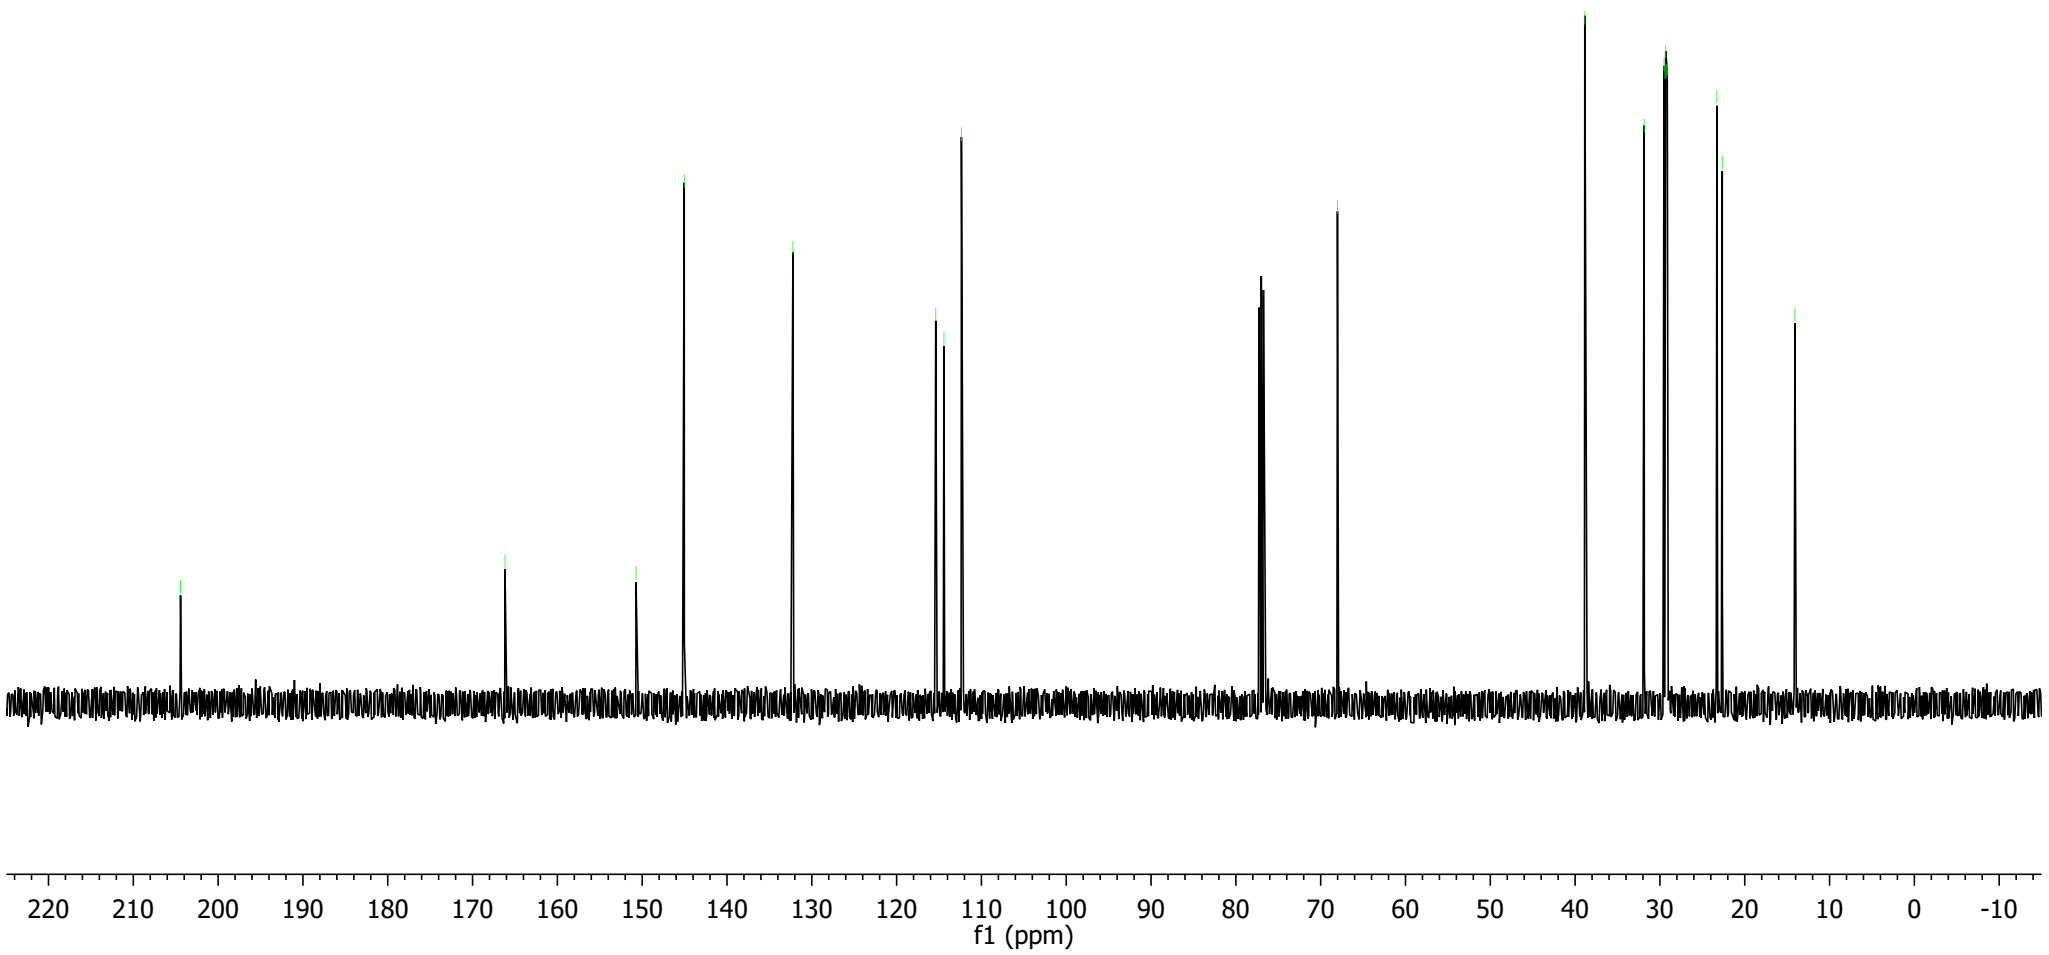

Title zhaoyl-1-87  
Solvent CDCl3  
Spectrometer Frequency 499.86

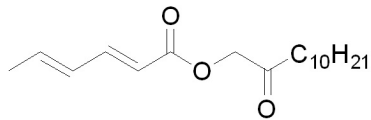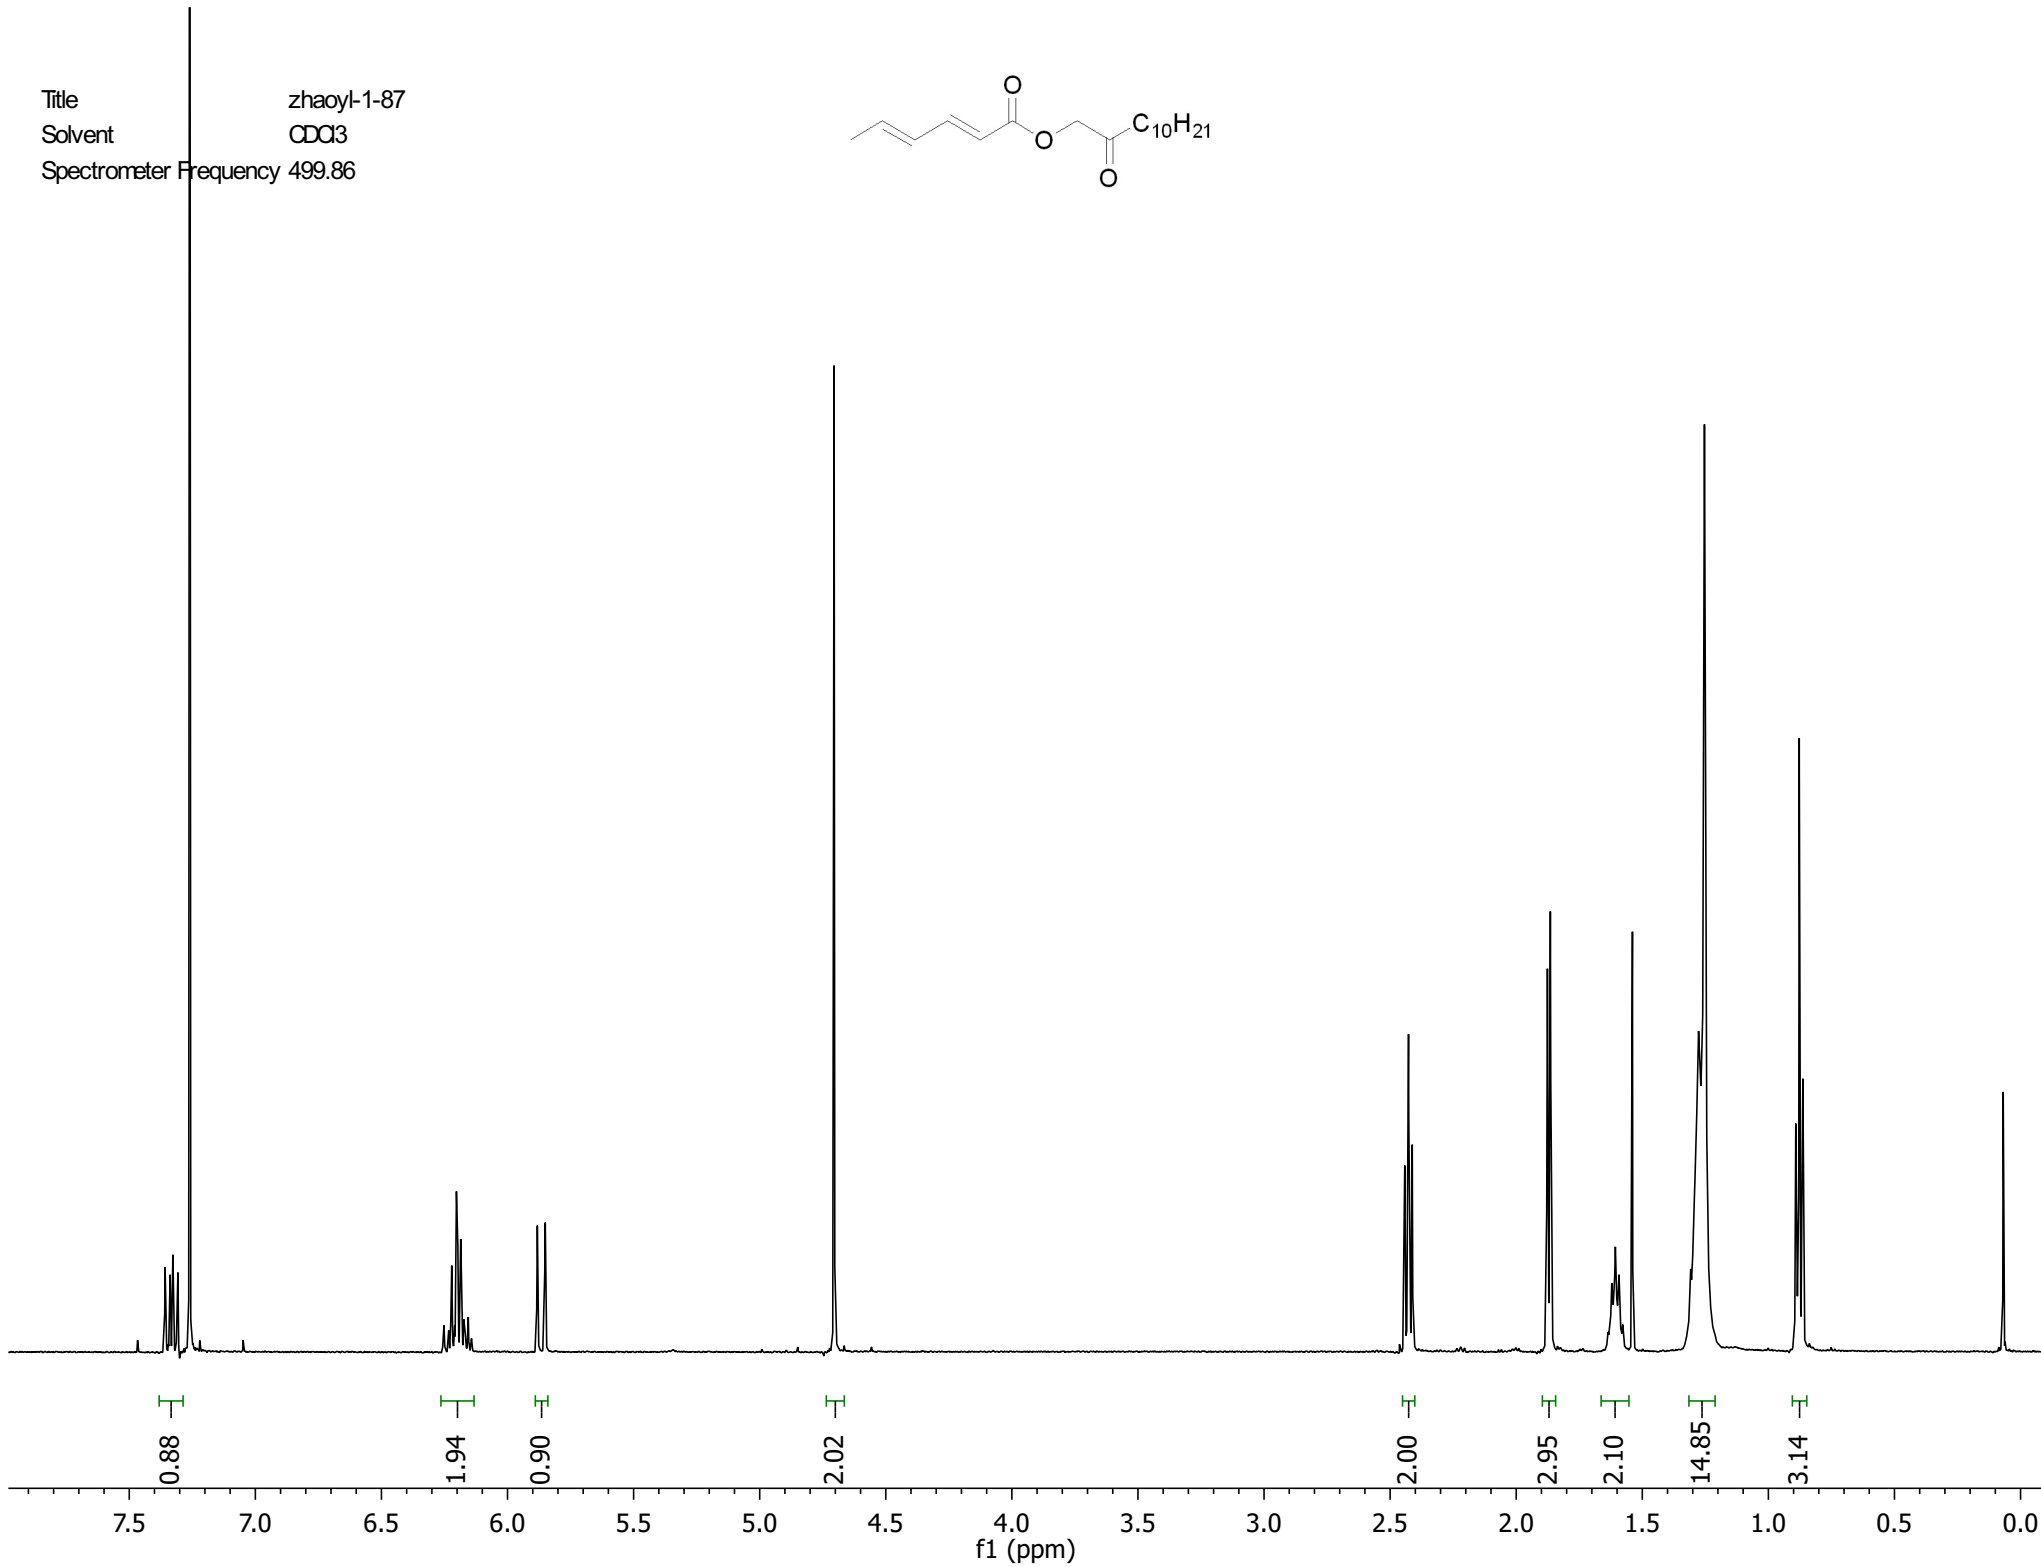

Title zhaoyl-1-87-C  
Solvent CDCl3  
Spectrometer Frequency 125.70

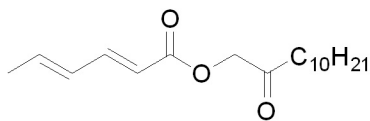

204.56 166.39 146.43 140.30 129.69 117.58 67.84 38.84 31.86 29.52 29.40 29.31 29.27 29.13 23.28 22.65 18.67 14.08

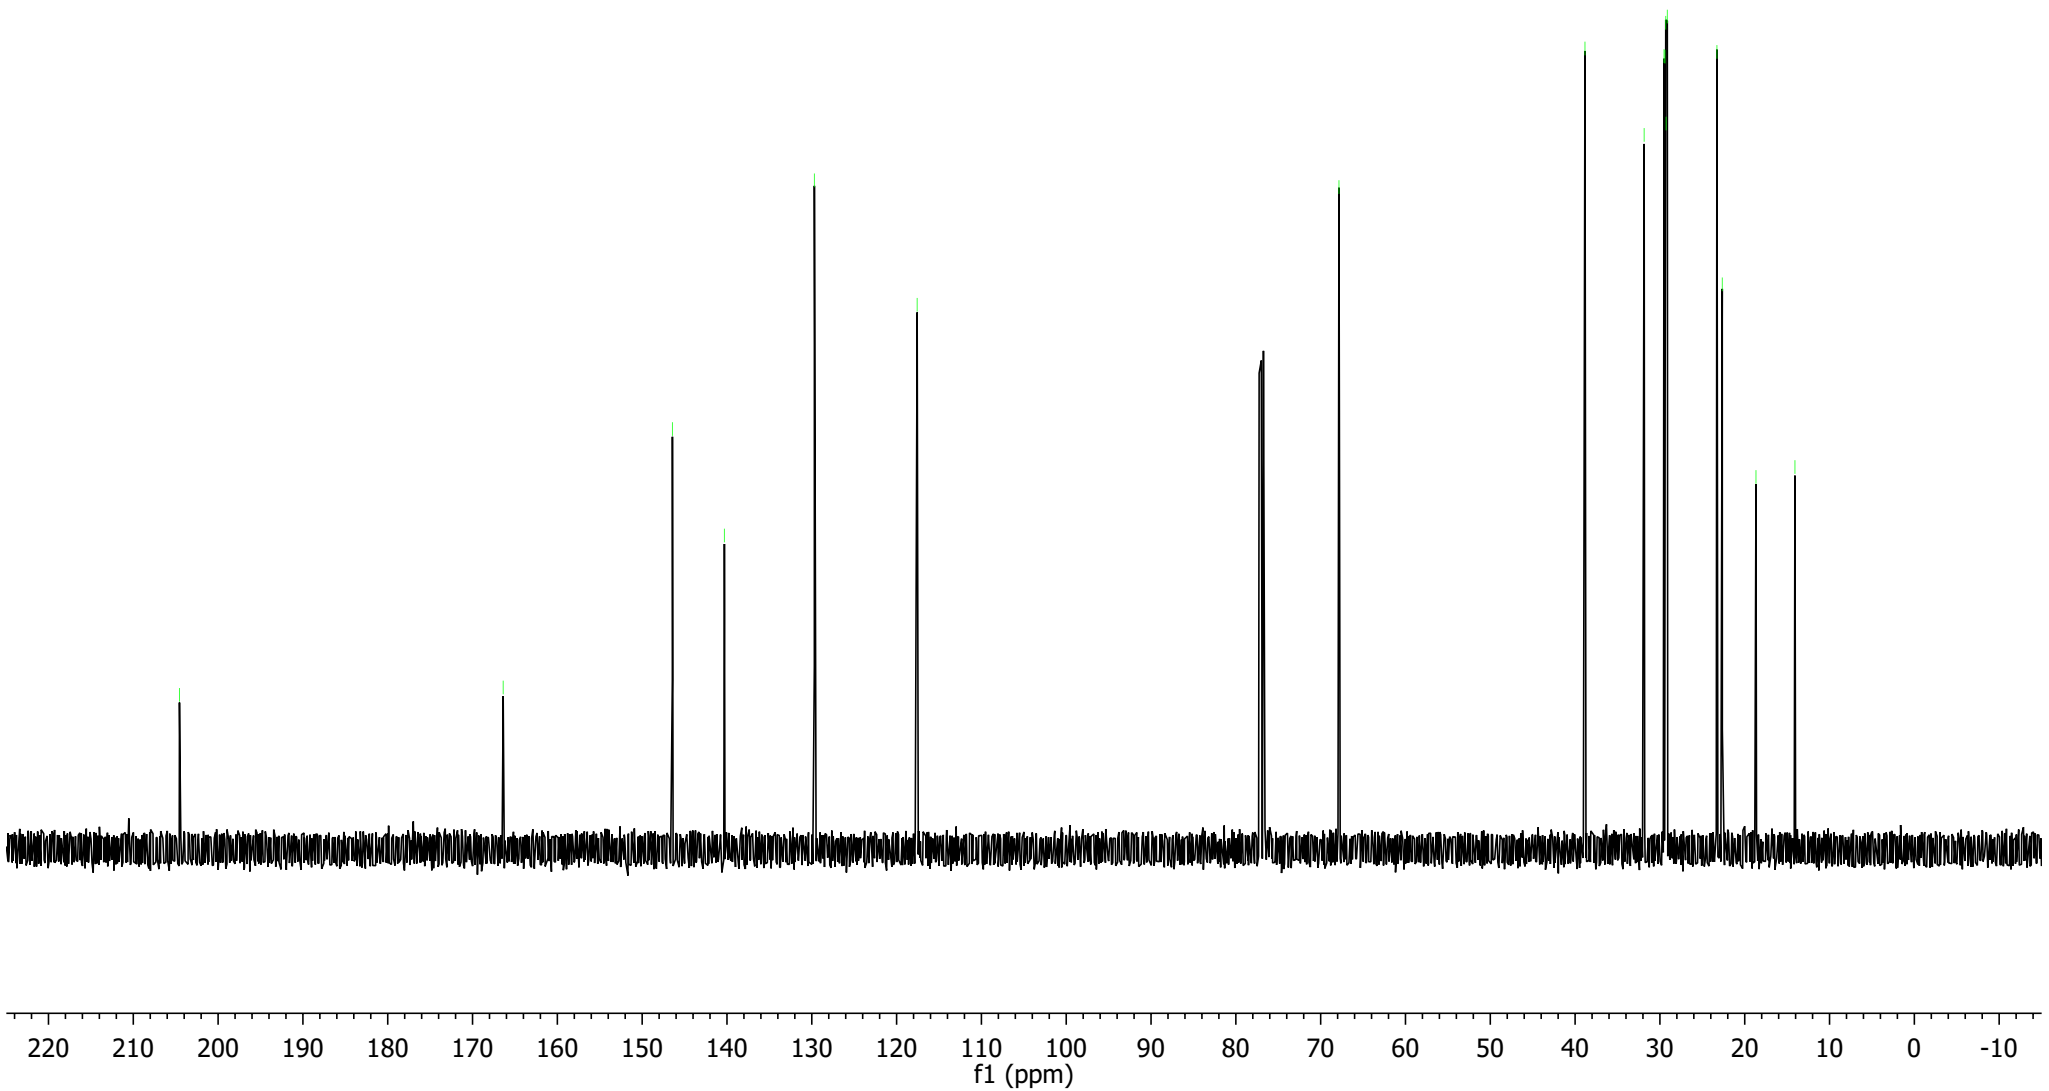

Title jkg-IV-152B-P-H  
Solvent cdcl3  
Spectrometer Frequency 599.64

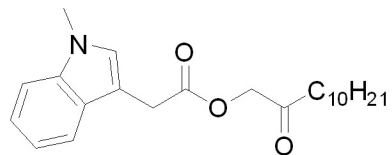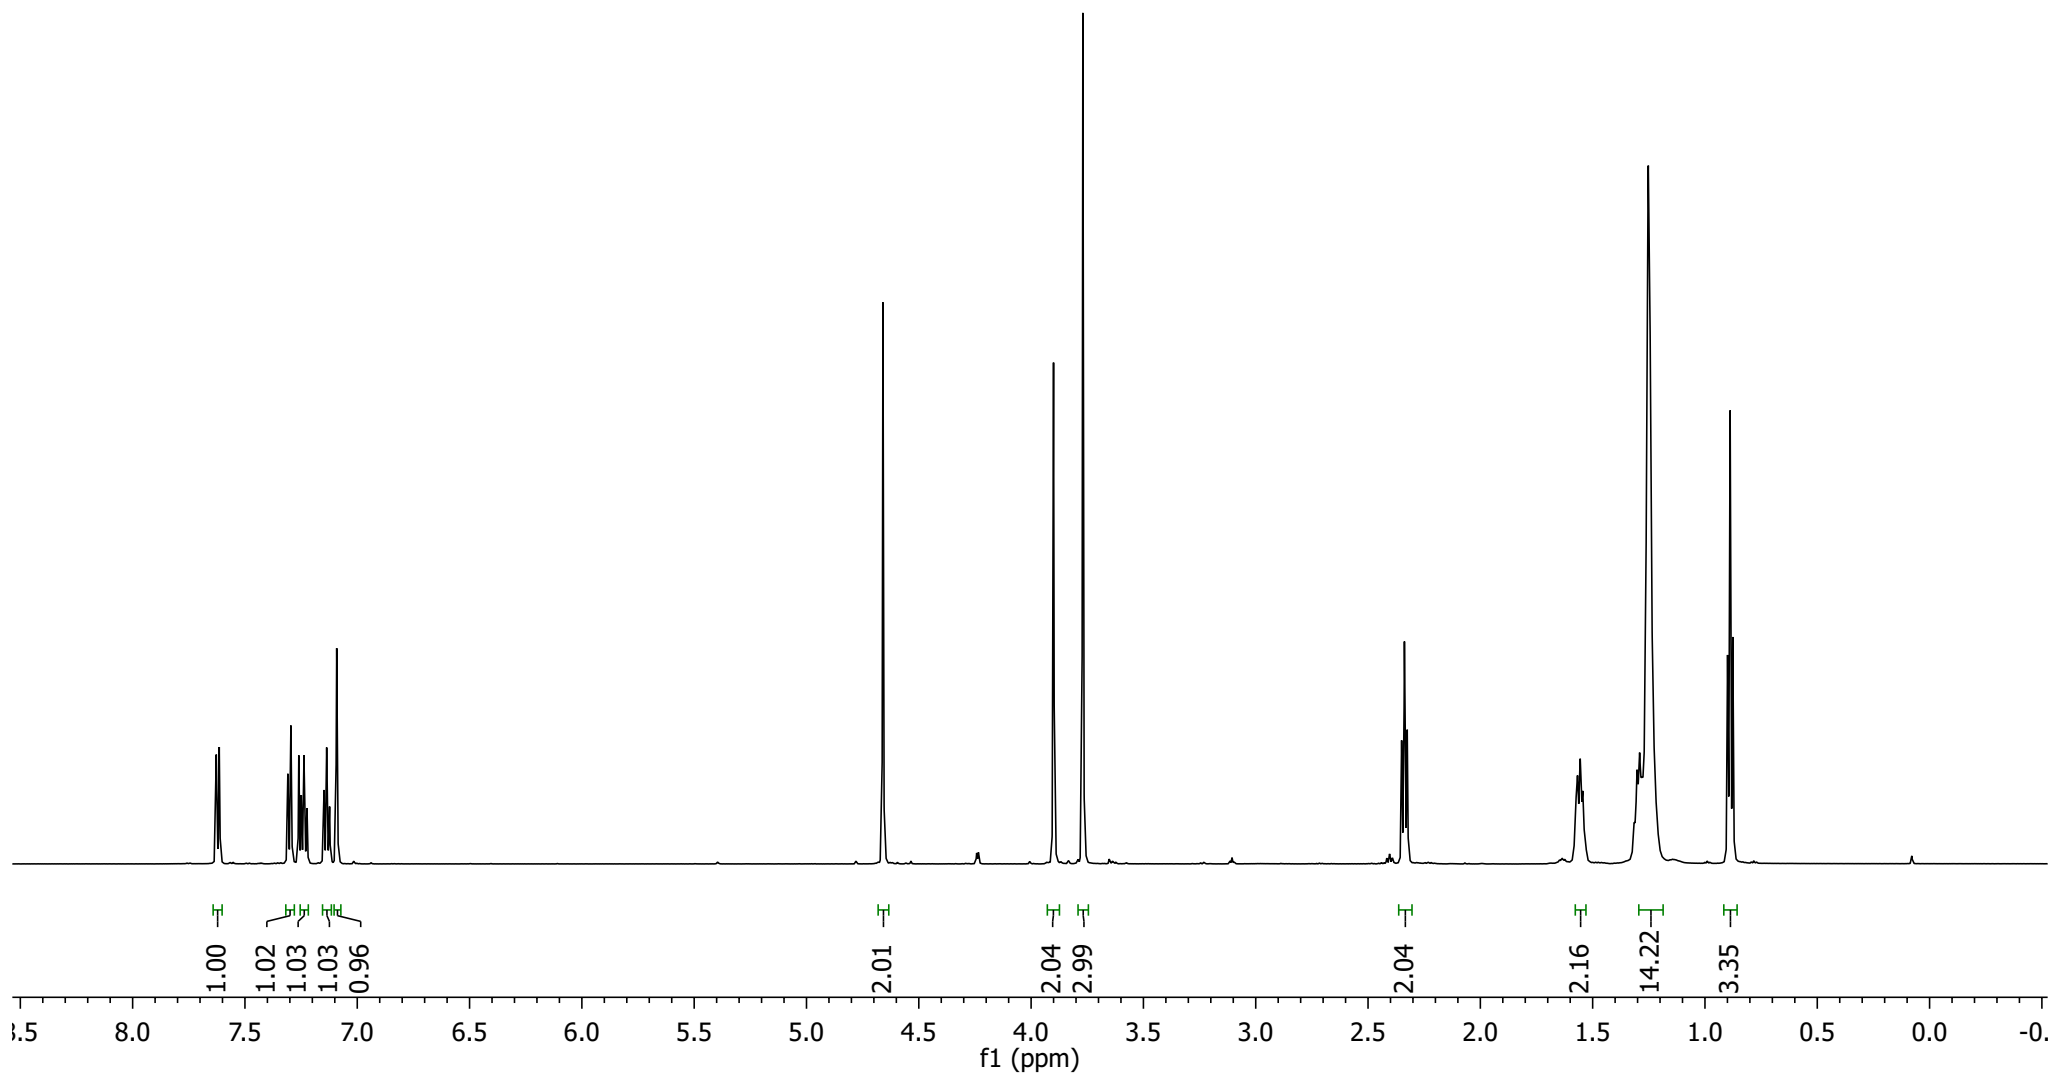



Title jkg-IV-152B-p-C  
Solvent CDCl3  
Spectrometer Frequency 125.70

204.24

171.30

136.83

127.81

127.58

121.77

119.19

118.85

109.24

106.21

77.25 CDCl3

77.00 CDCl3

76.75 CDCl3

68.17

38.78

31.85

29.50

29.38

29.27

29.04

23.18

14.68

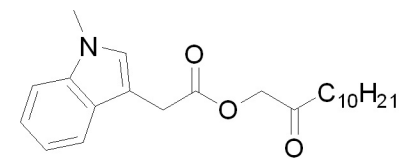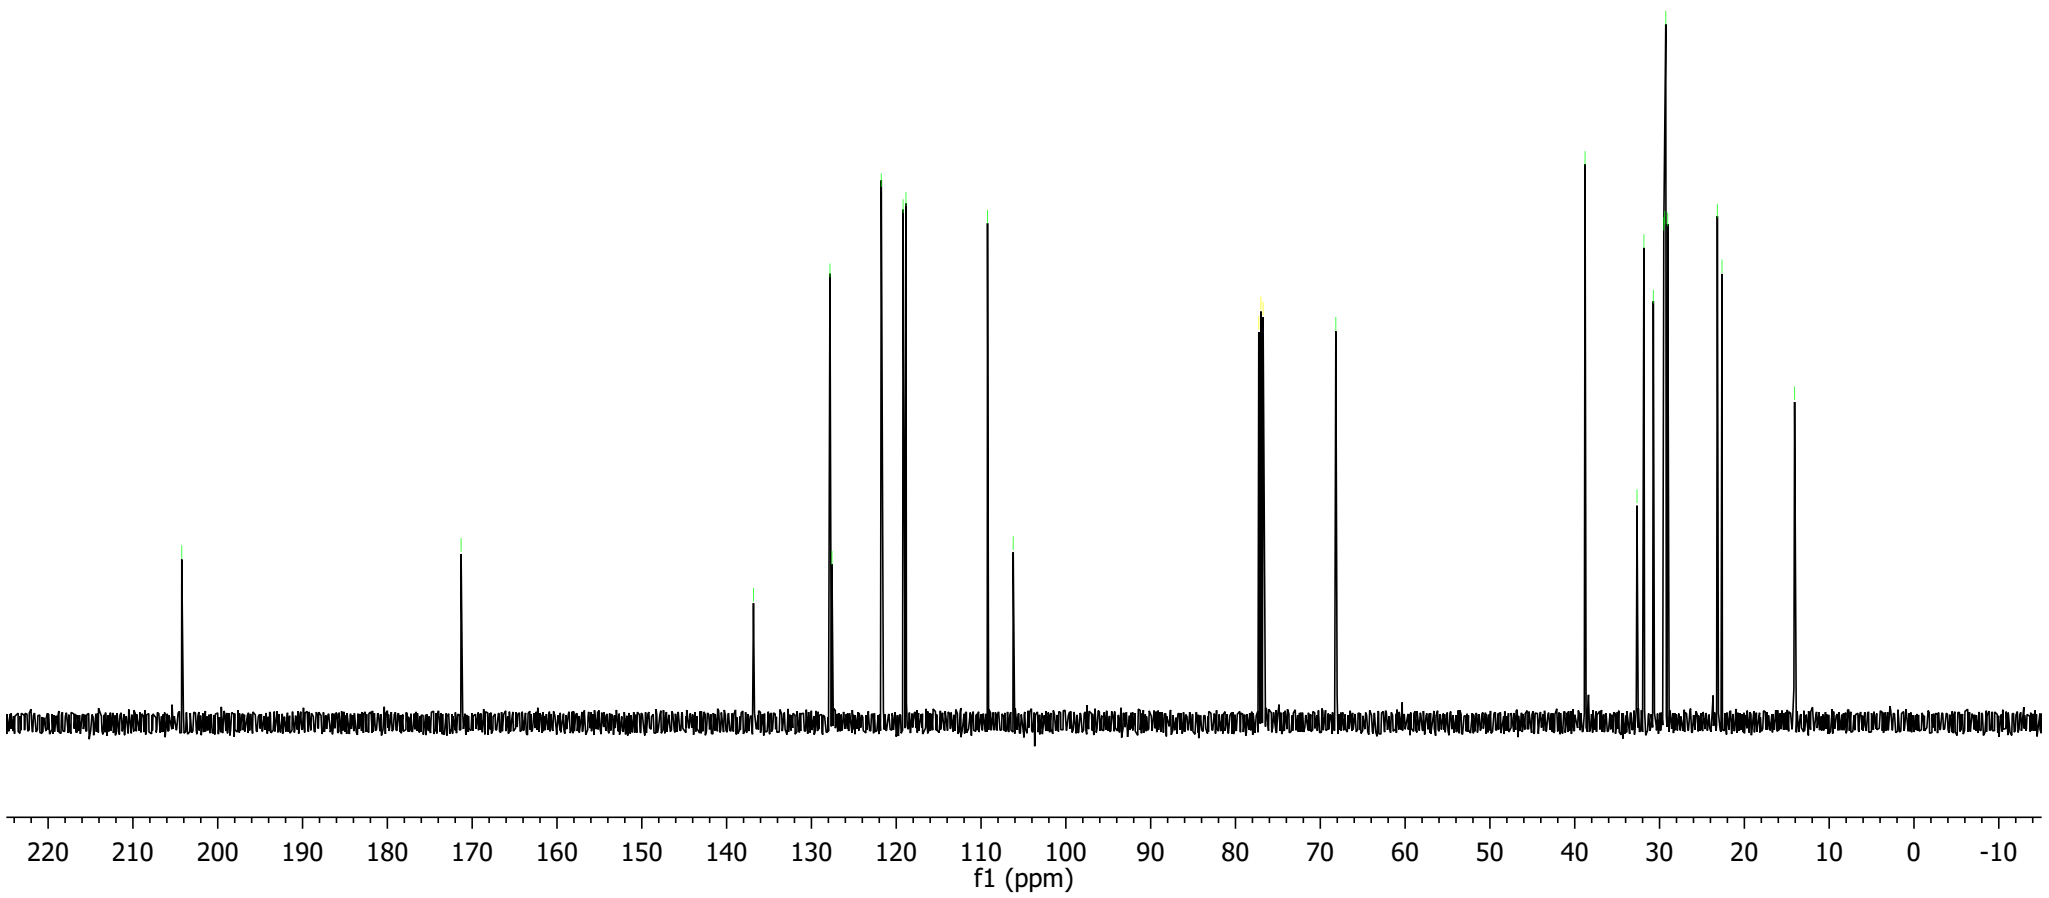

Title zhaoyl-1-96  
Solvent cdcl3  
Spectrometer Frequency 599.64

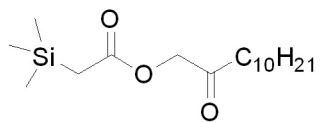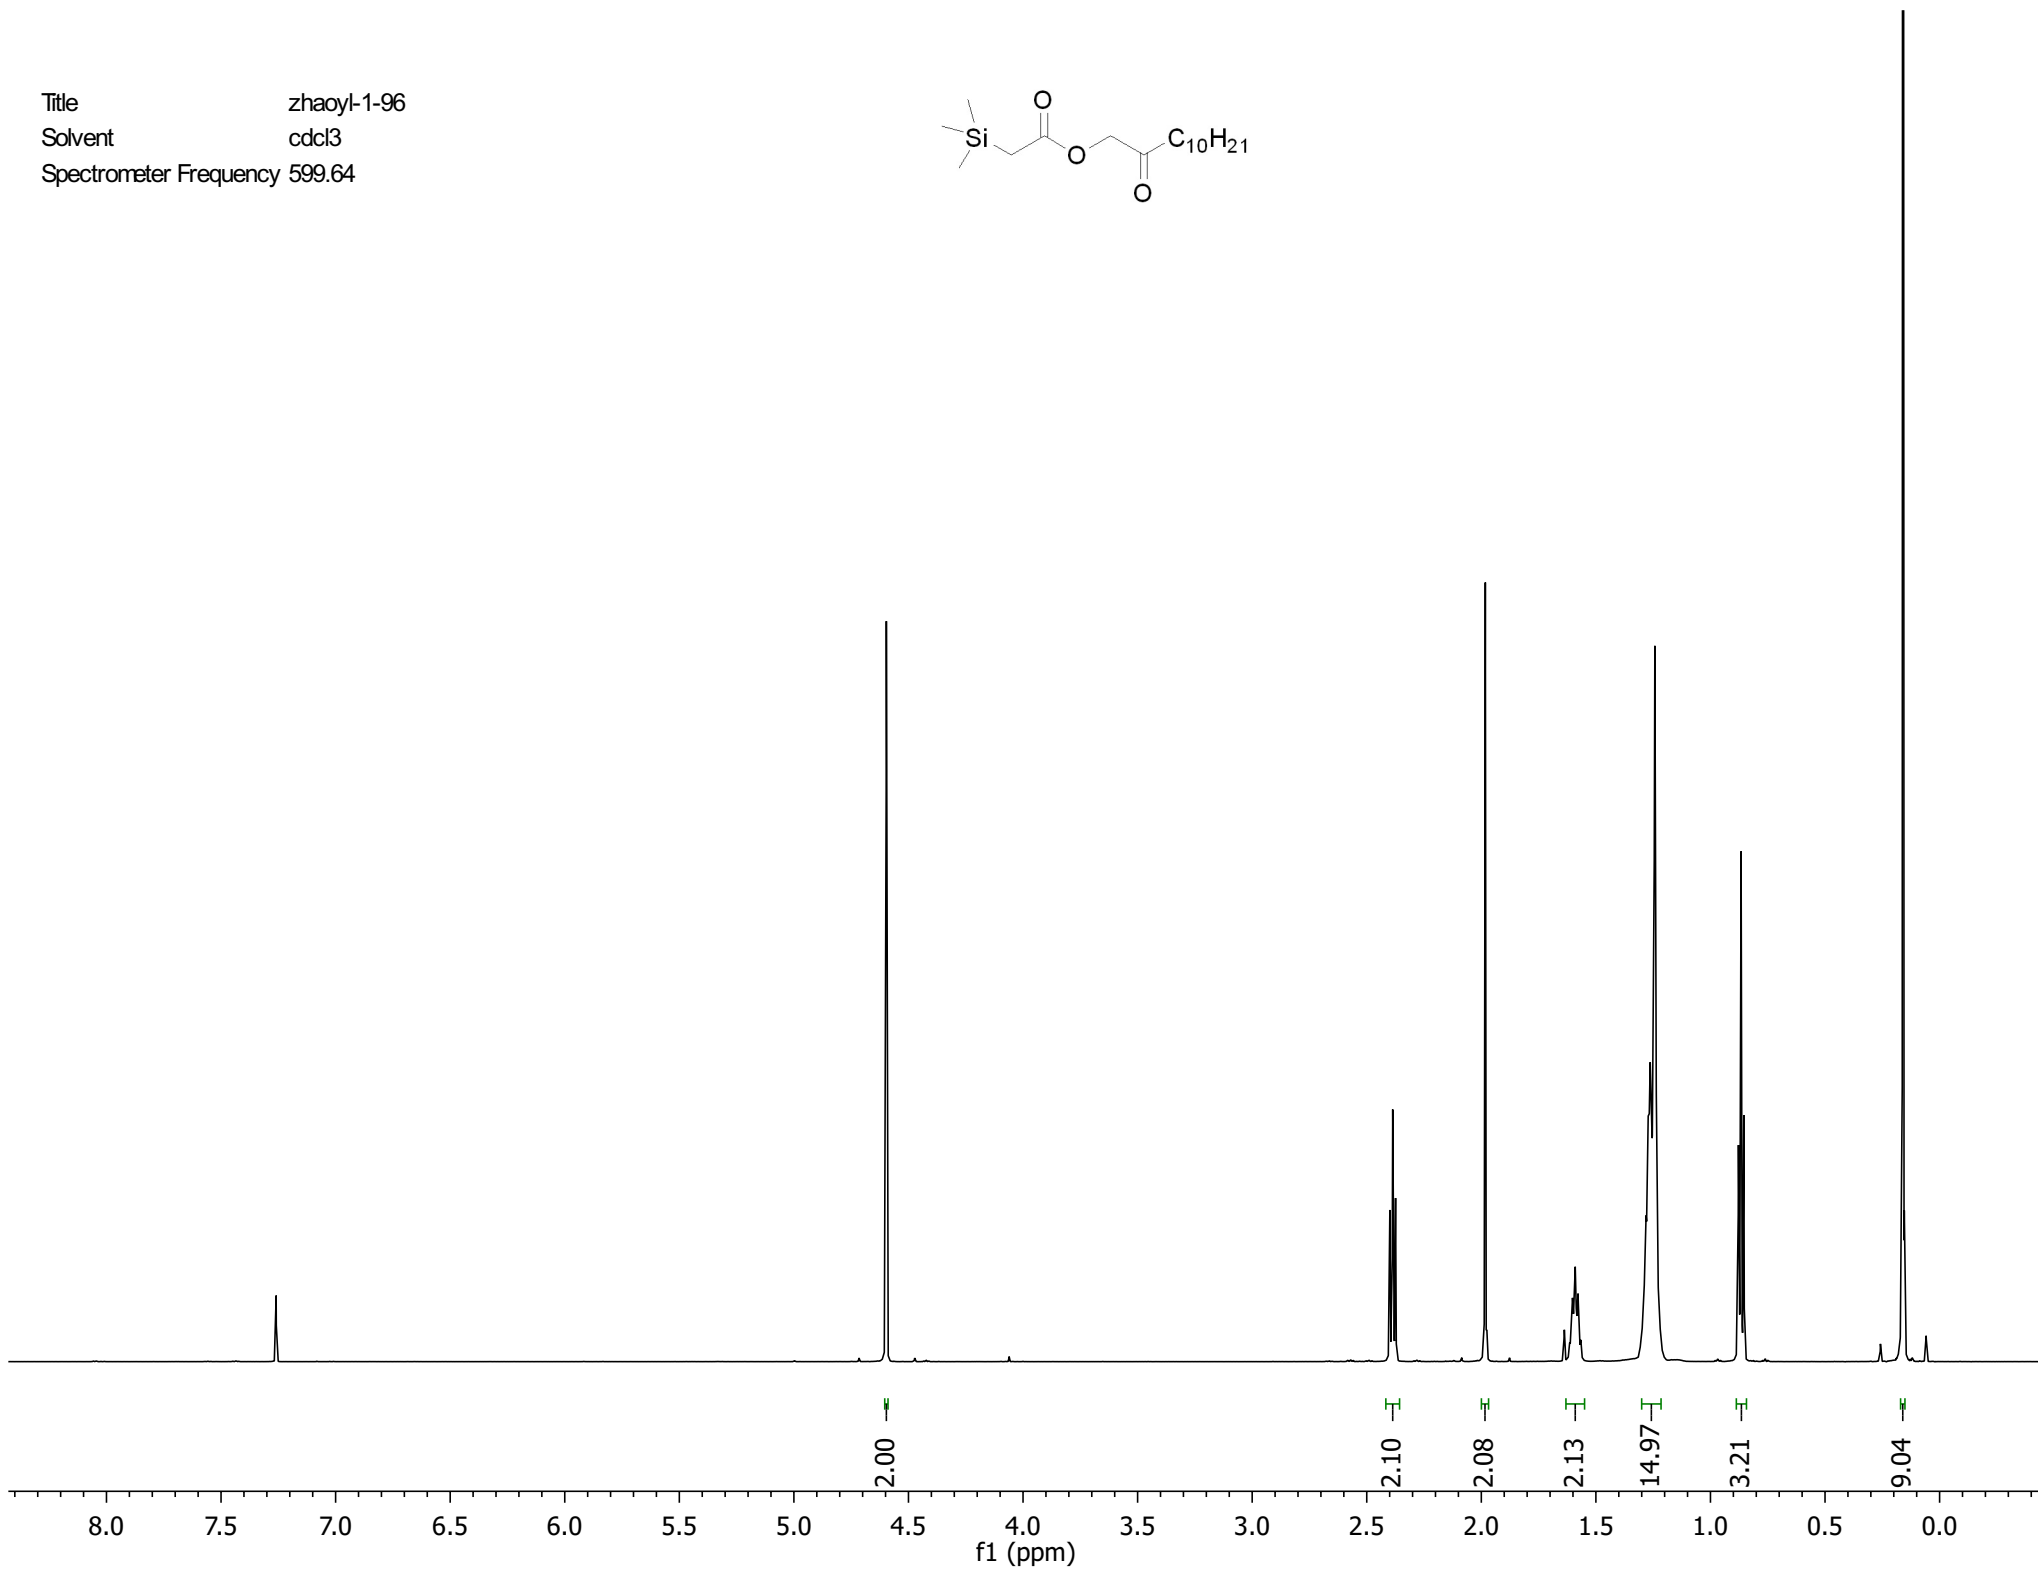

Title  
Solvent  
Spectrometer Frequency

zhaoyl-1-96-C  
cdcl3

150.79

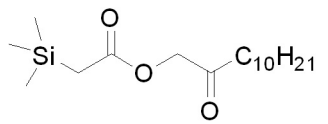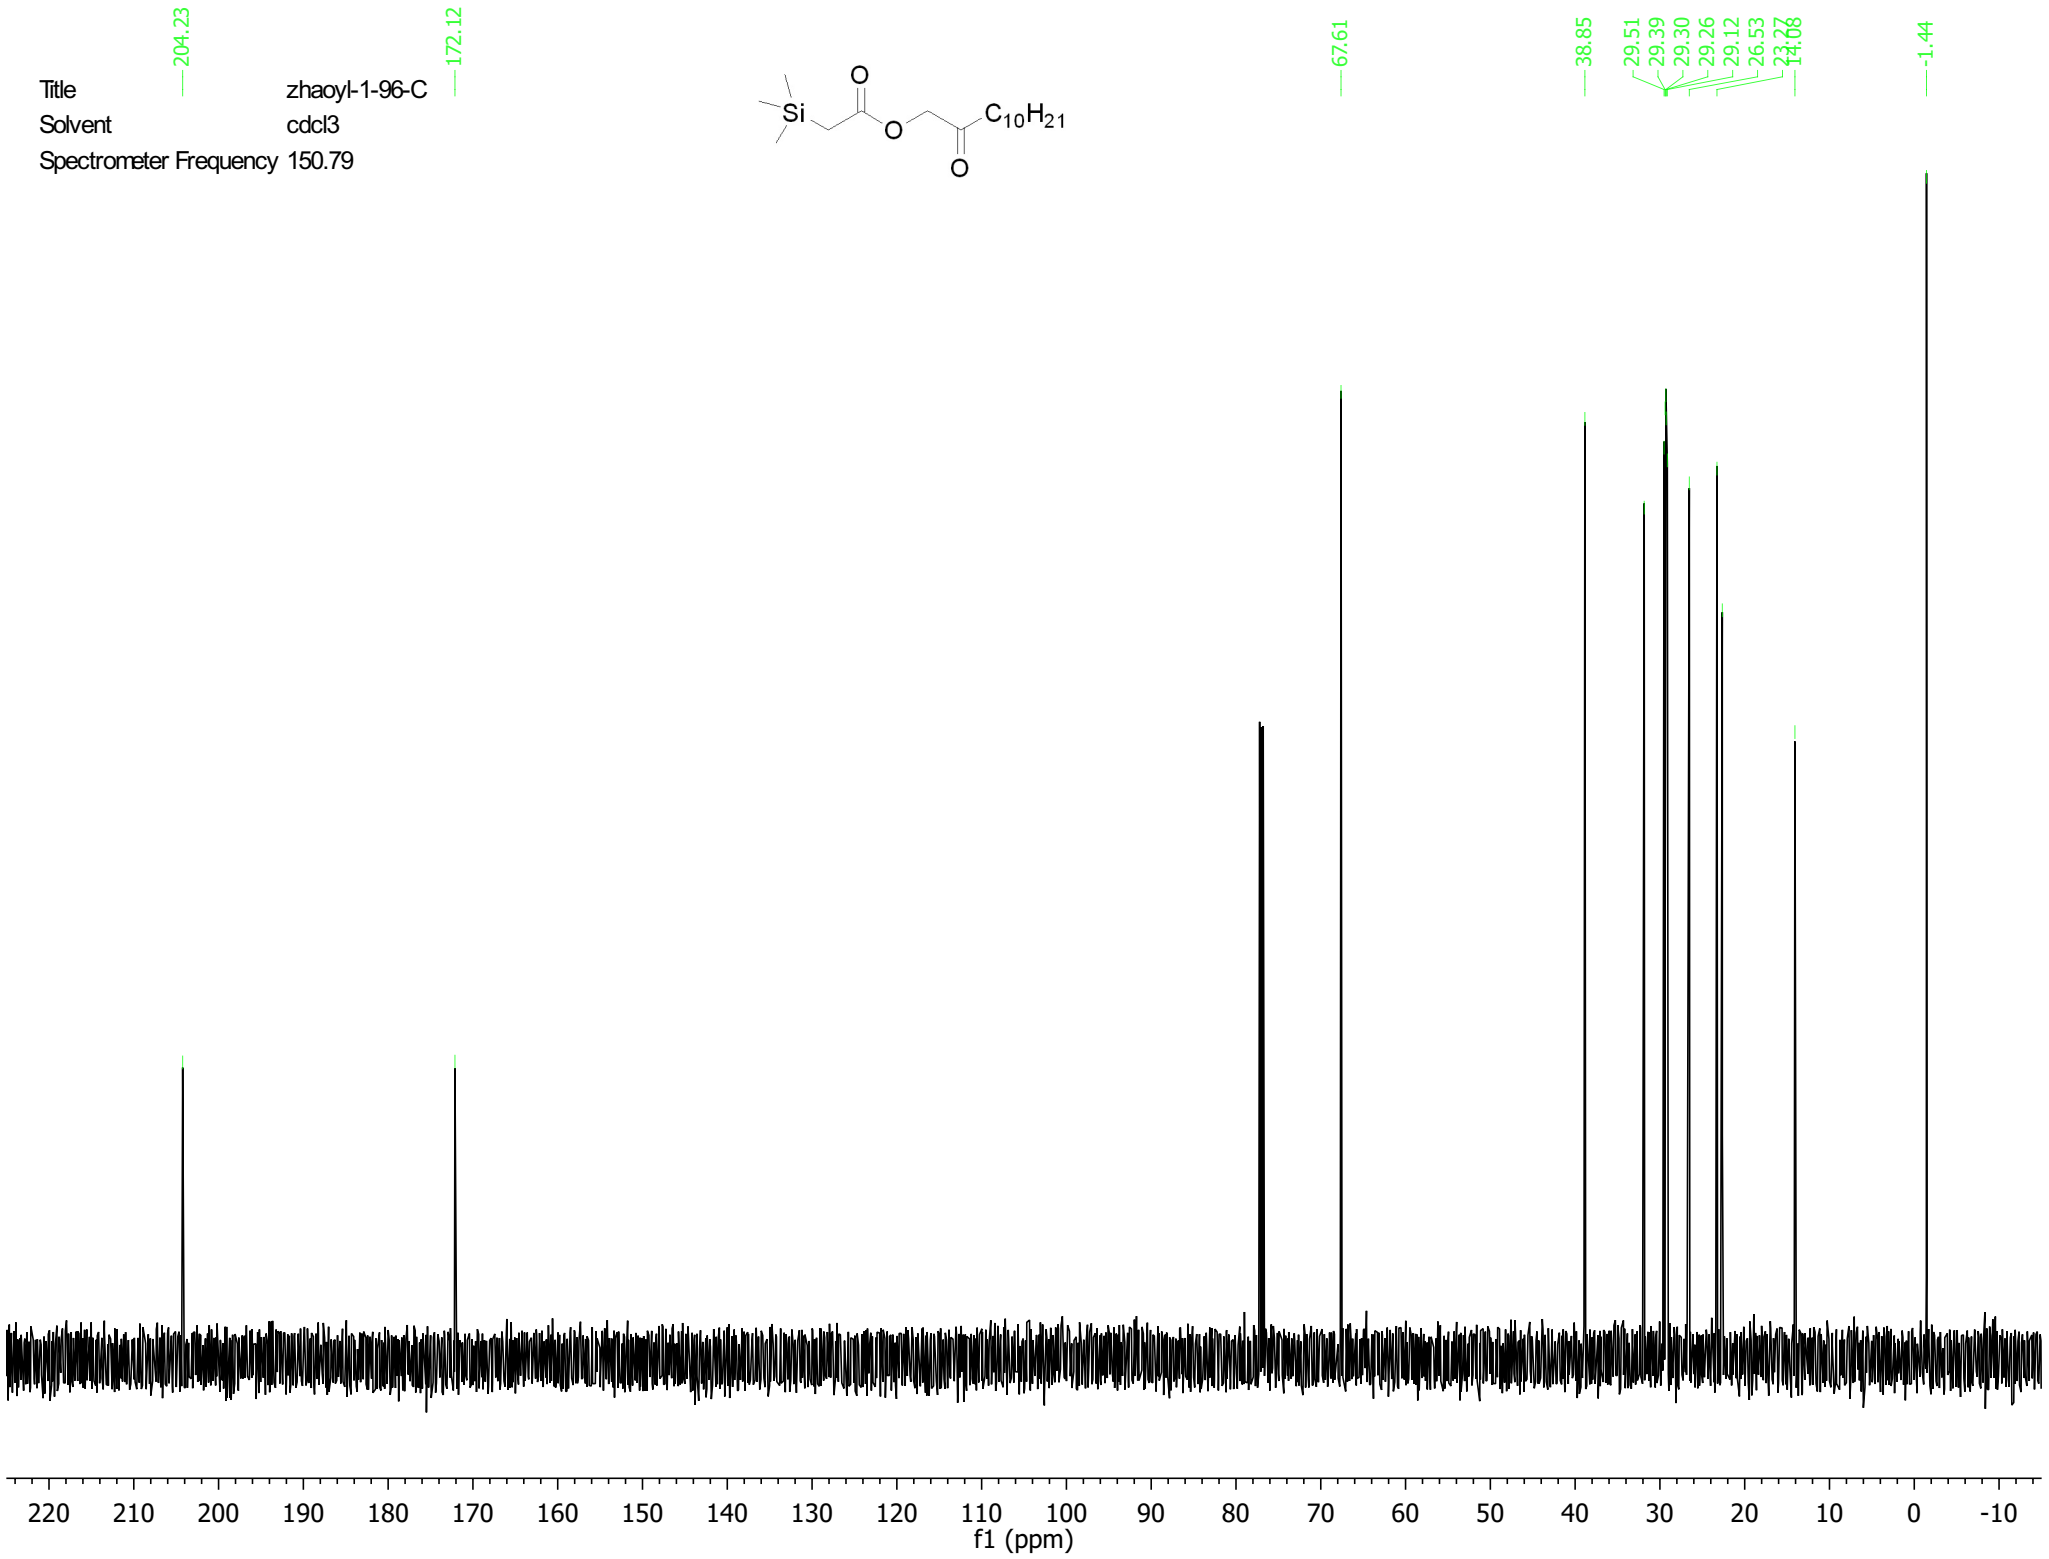

Title zhaoyl-1-93-2  
Solvent CDCl3  
Spectrometer Frequency 499.86

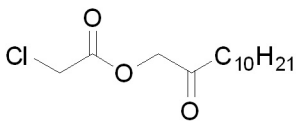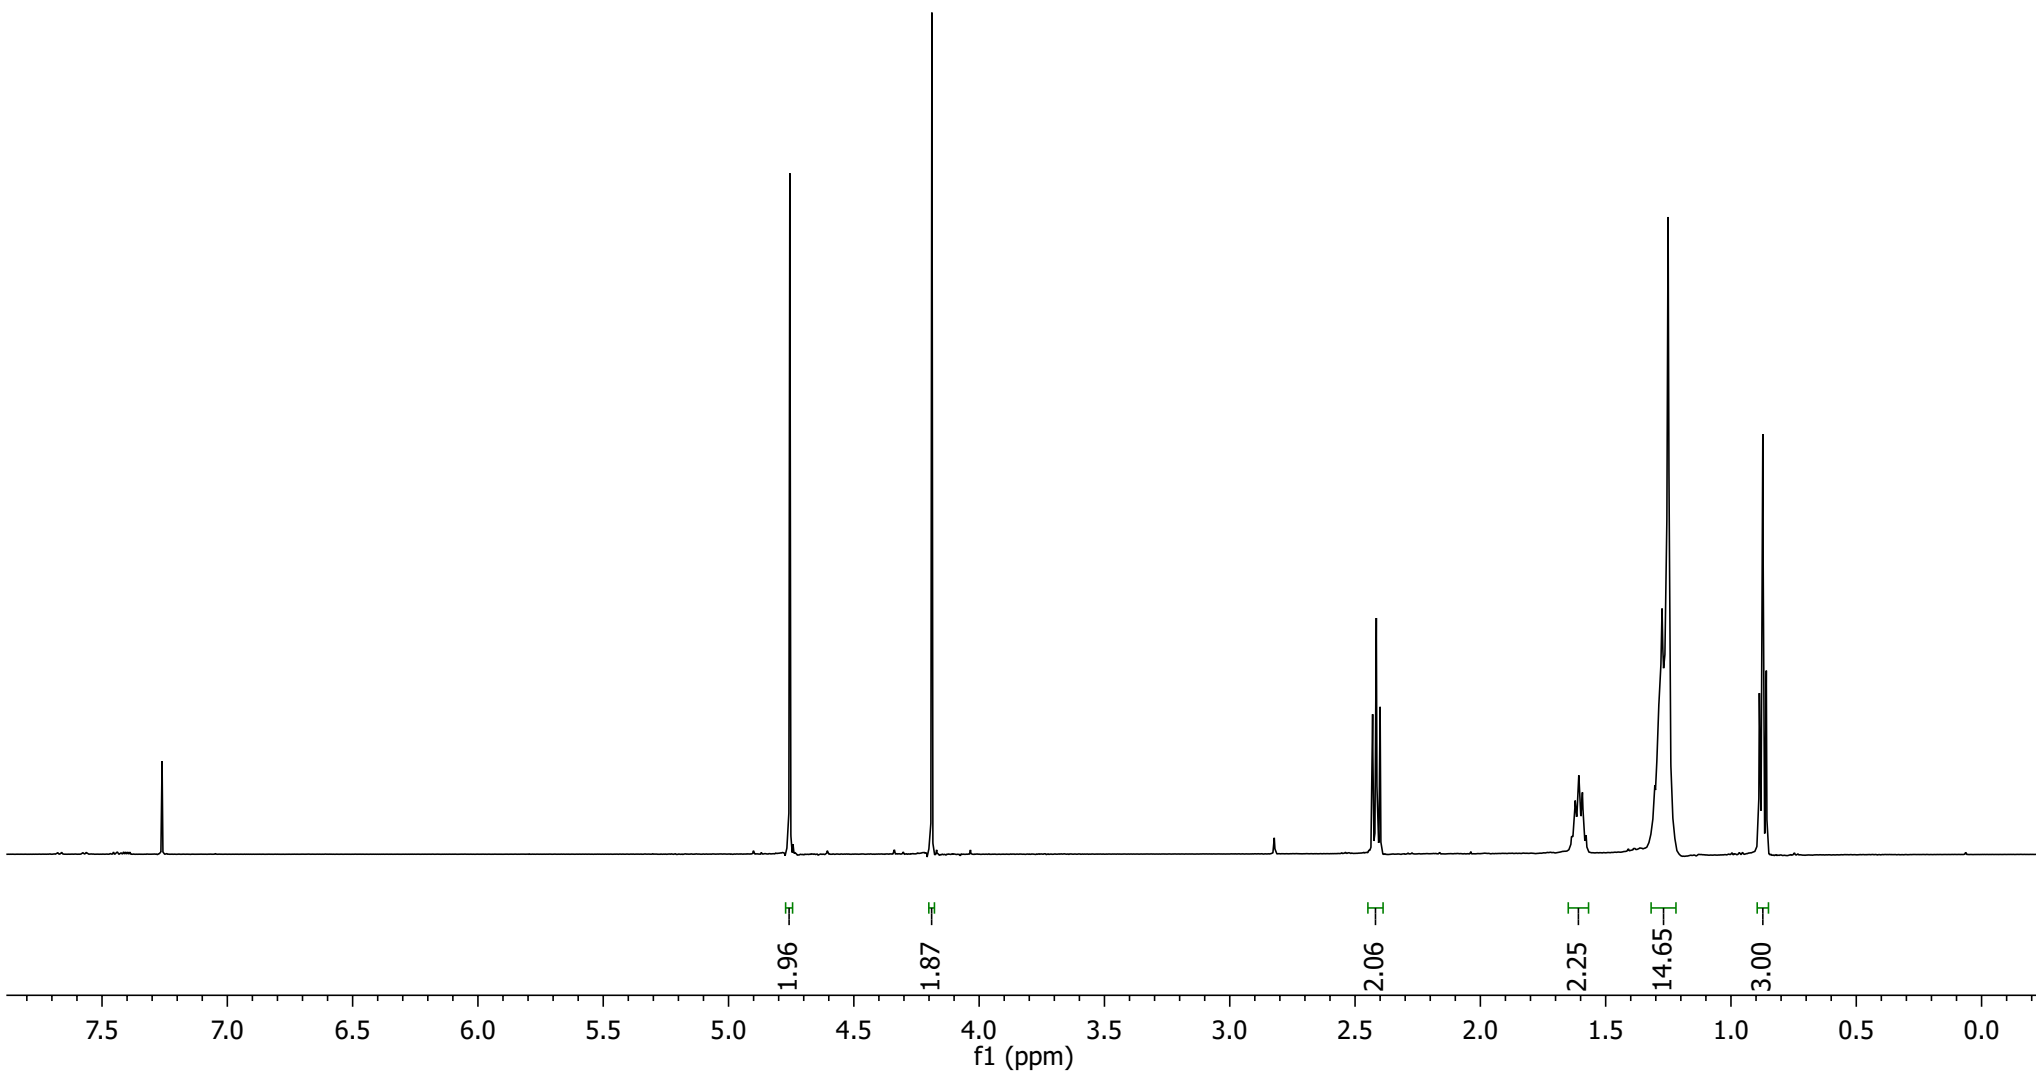

Title zhaoyl-1-93-C  
Solvent CDCl3  
Spectrometer Frequency 125.70

202.64

166.73

77.26 CDCl3  
77.00 CDCl3  
76.75 CDCl3

68.88

40.40  
38.79

31.86  
29.52  
29.39  
29.29  
29.27  
29.09  
27.88  
24.09

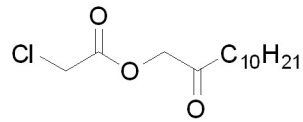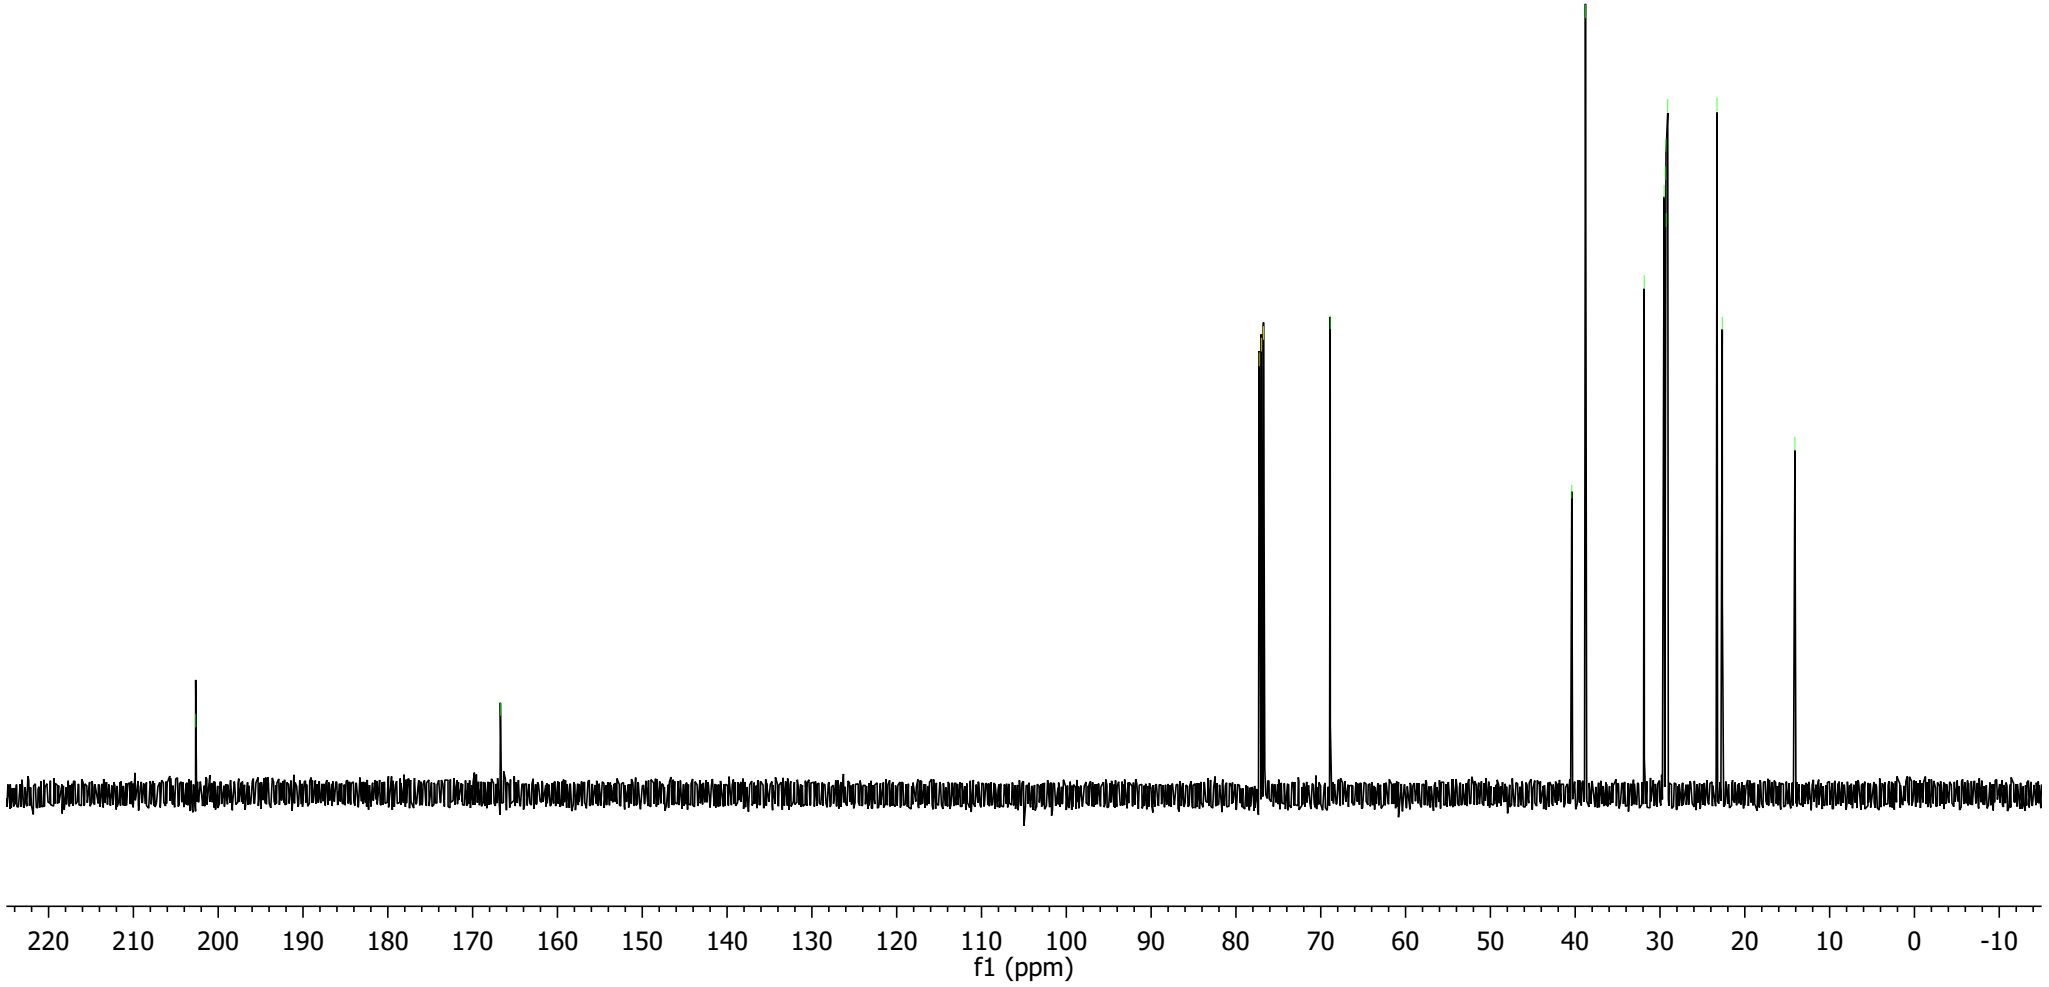

Title jkg-IV-148A-H  
Solvent cdcl3  
Spectrometer Frequency 599.64

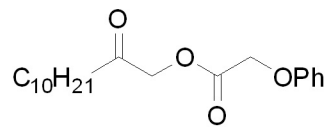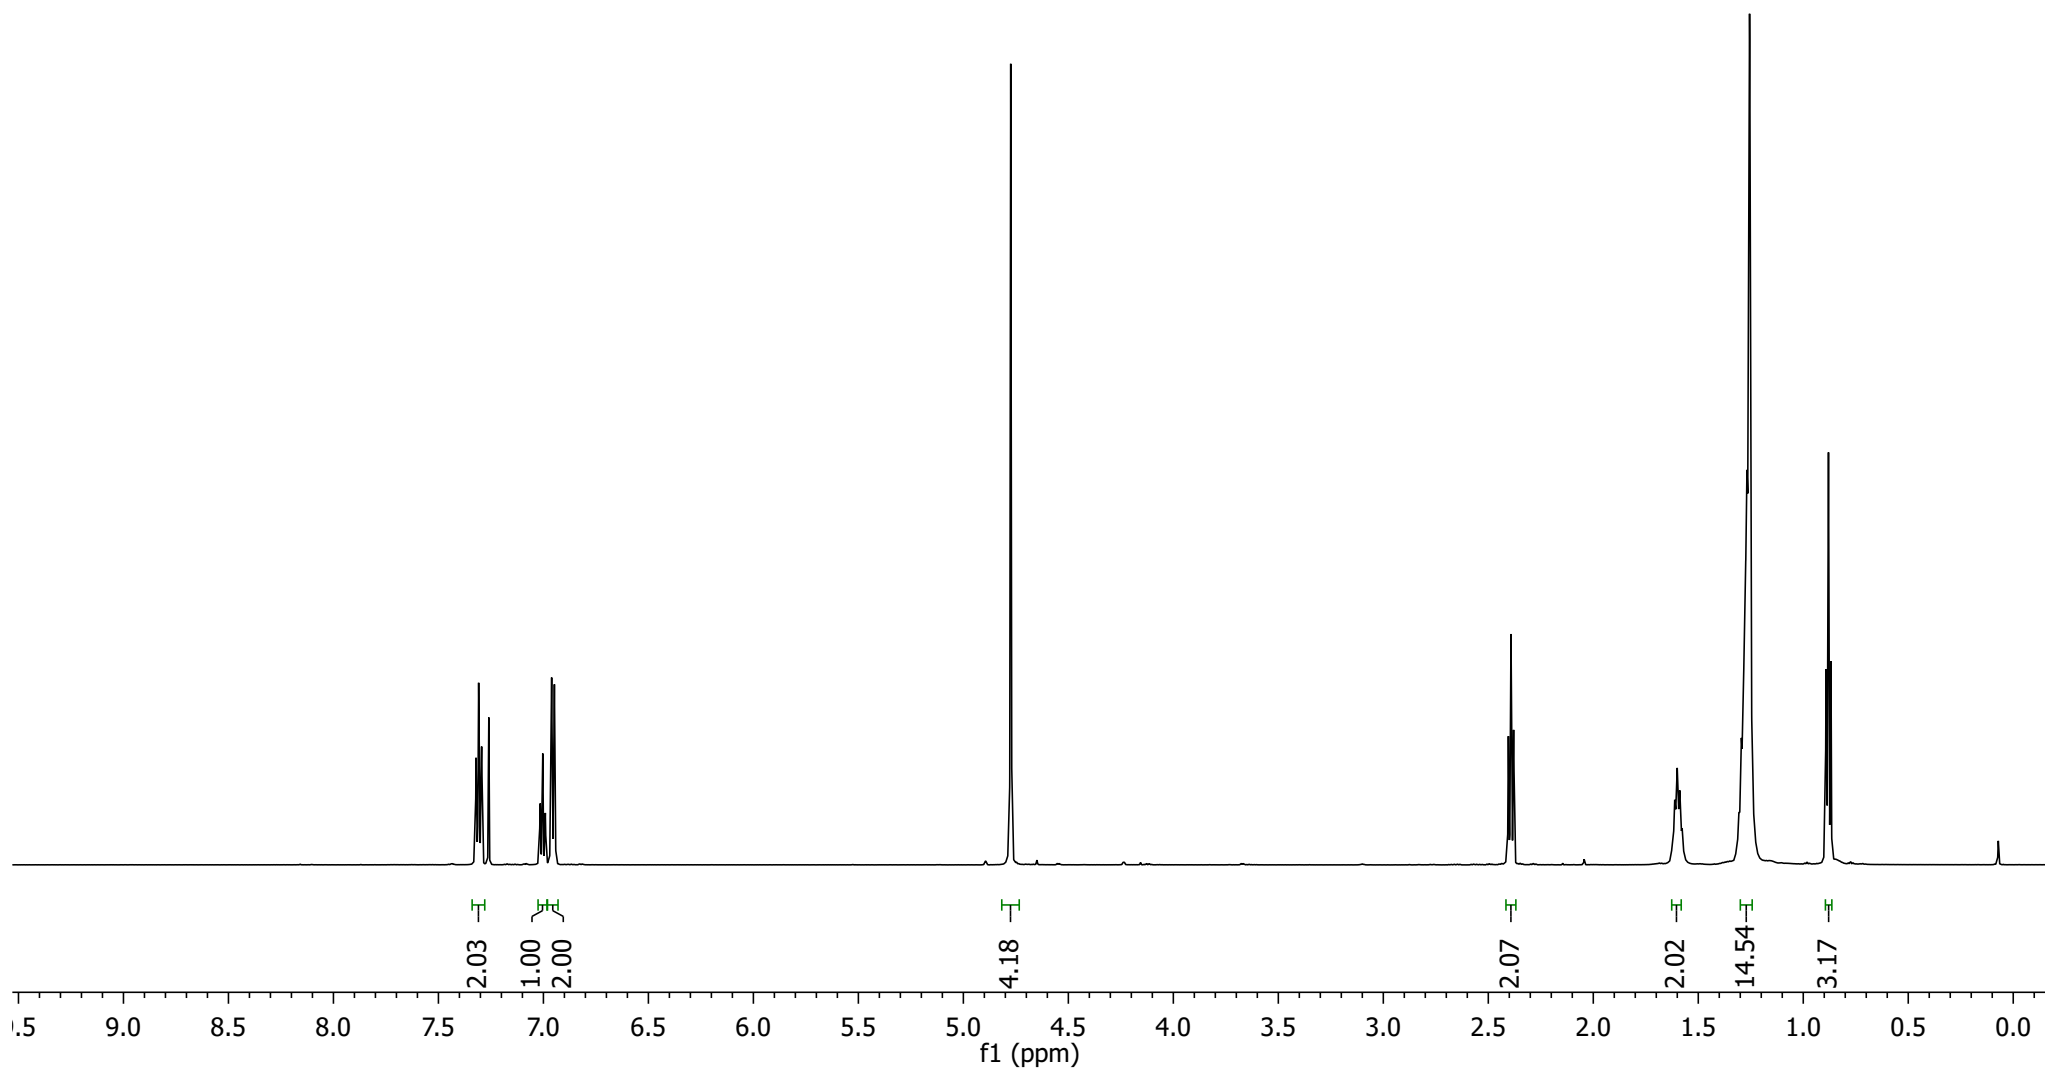

Title jkg-IV-148A-C  
Solvent cdc13  
Spectrometer Frequency 150.79

202.96

168.43

157.68

129.58

121.84

114.64

77.21 cdc13  
77.00 cdc13  
76.79 cdc13

68.21  
64.99

38.80

31.86  
29.52  
29.39  
29.29  
29.27  
29.09  
27.68  
14.09

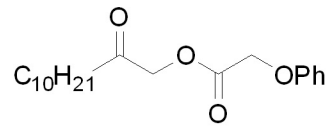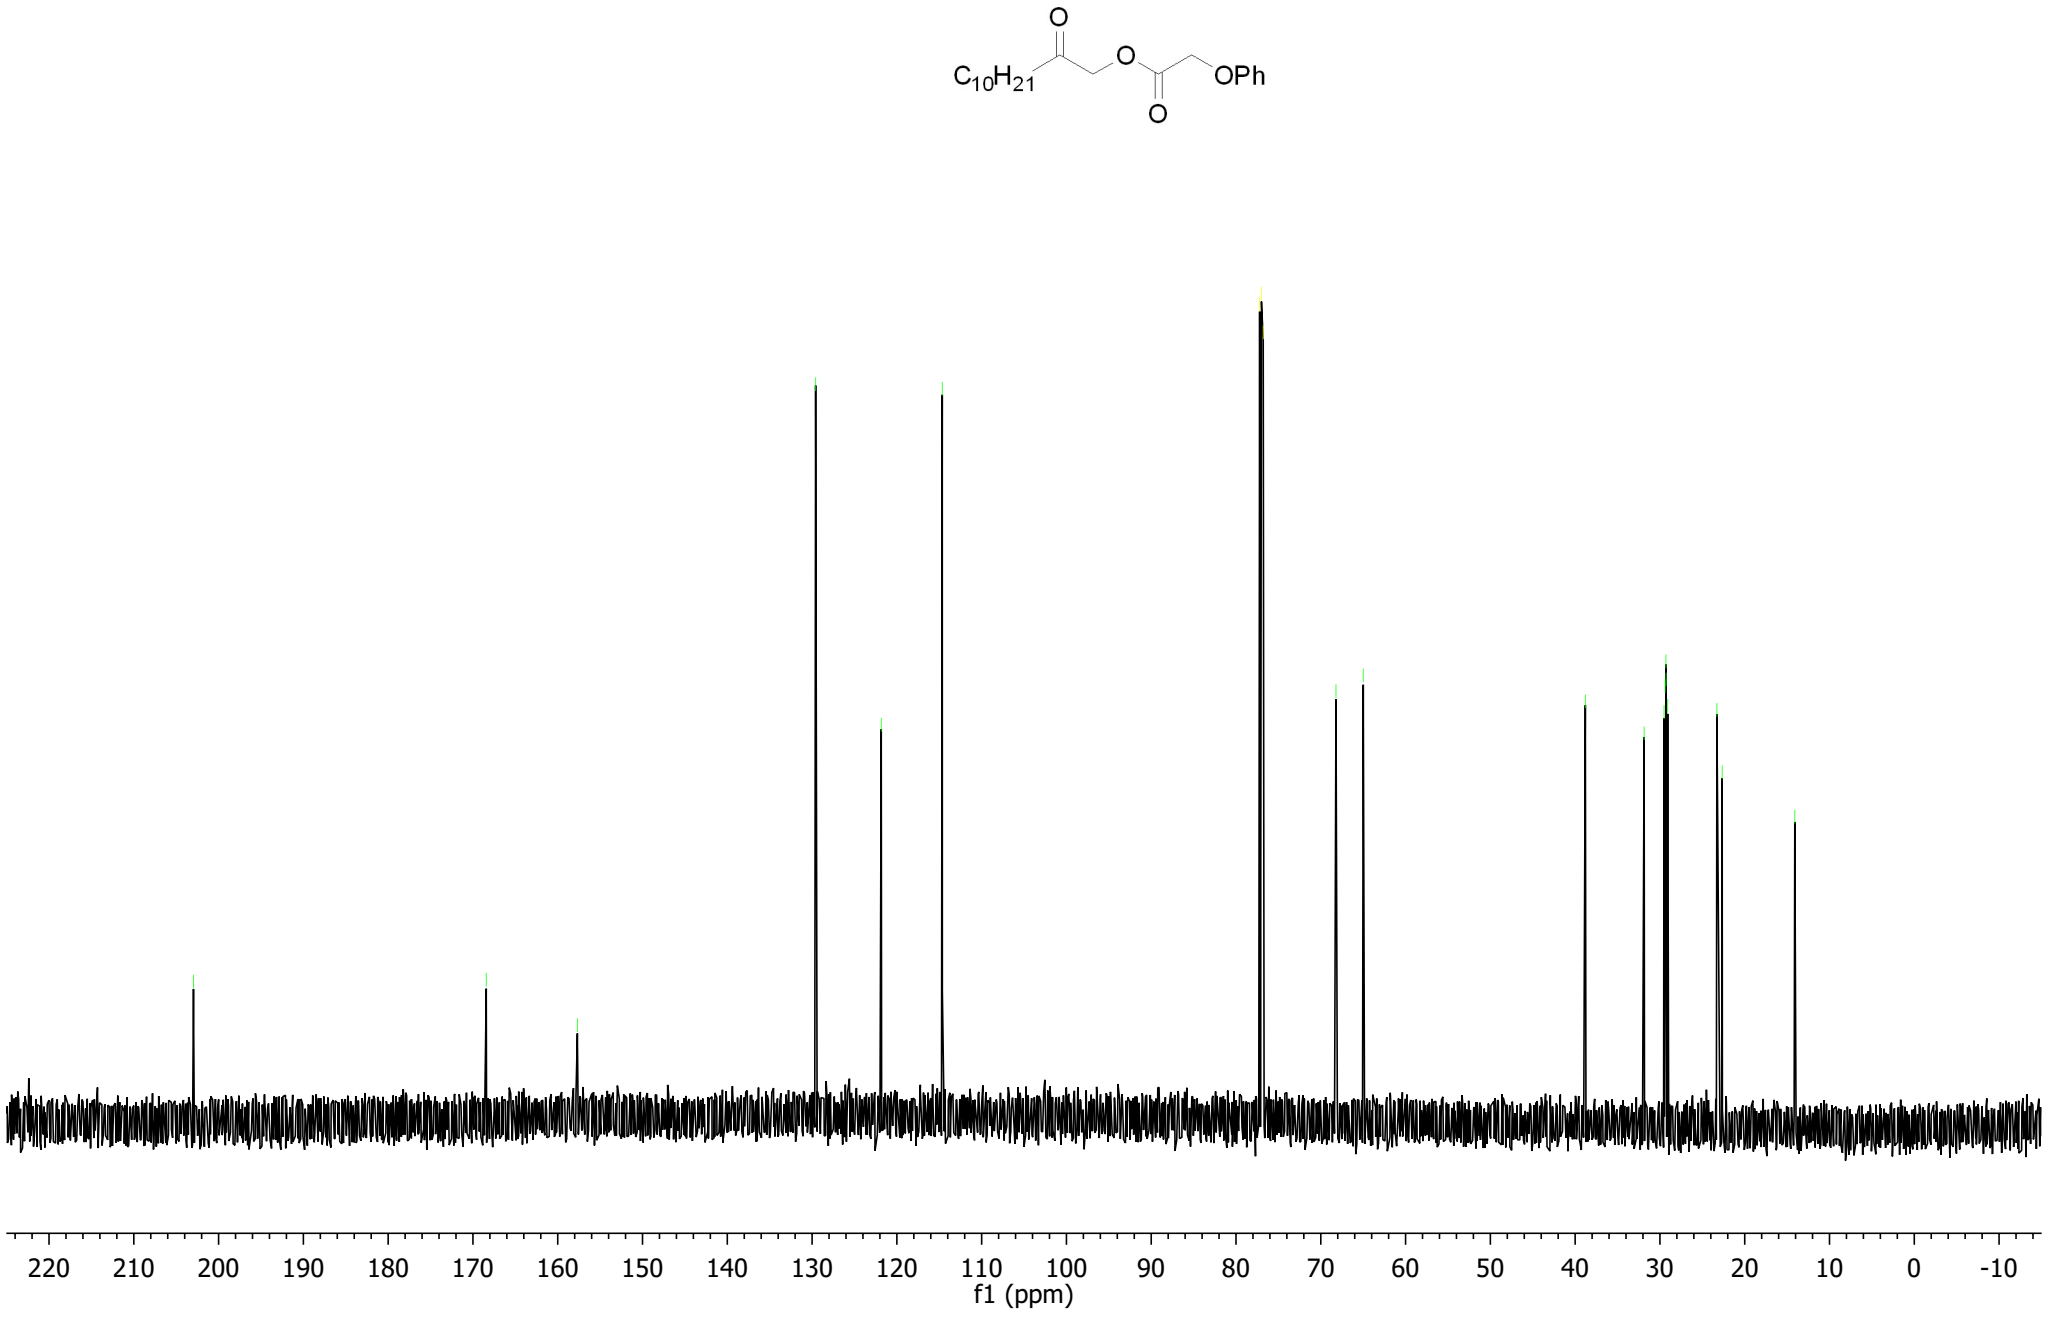

Title zhaoyl-1-111  
Solvent CDCl3  
Number of Scans 8  
Relaxation Delay 5.0000  
Acquisition Date 2013-02-13T14:11:18  
Spectrometer Frequency 499.86

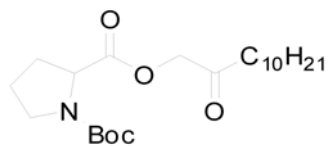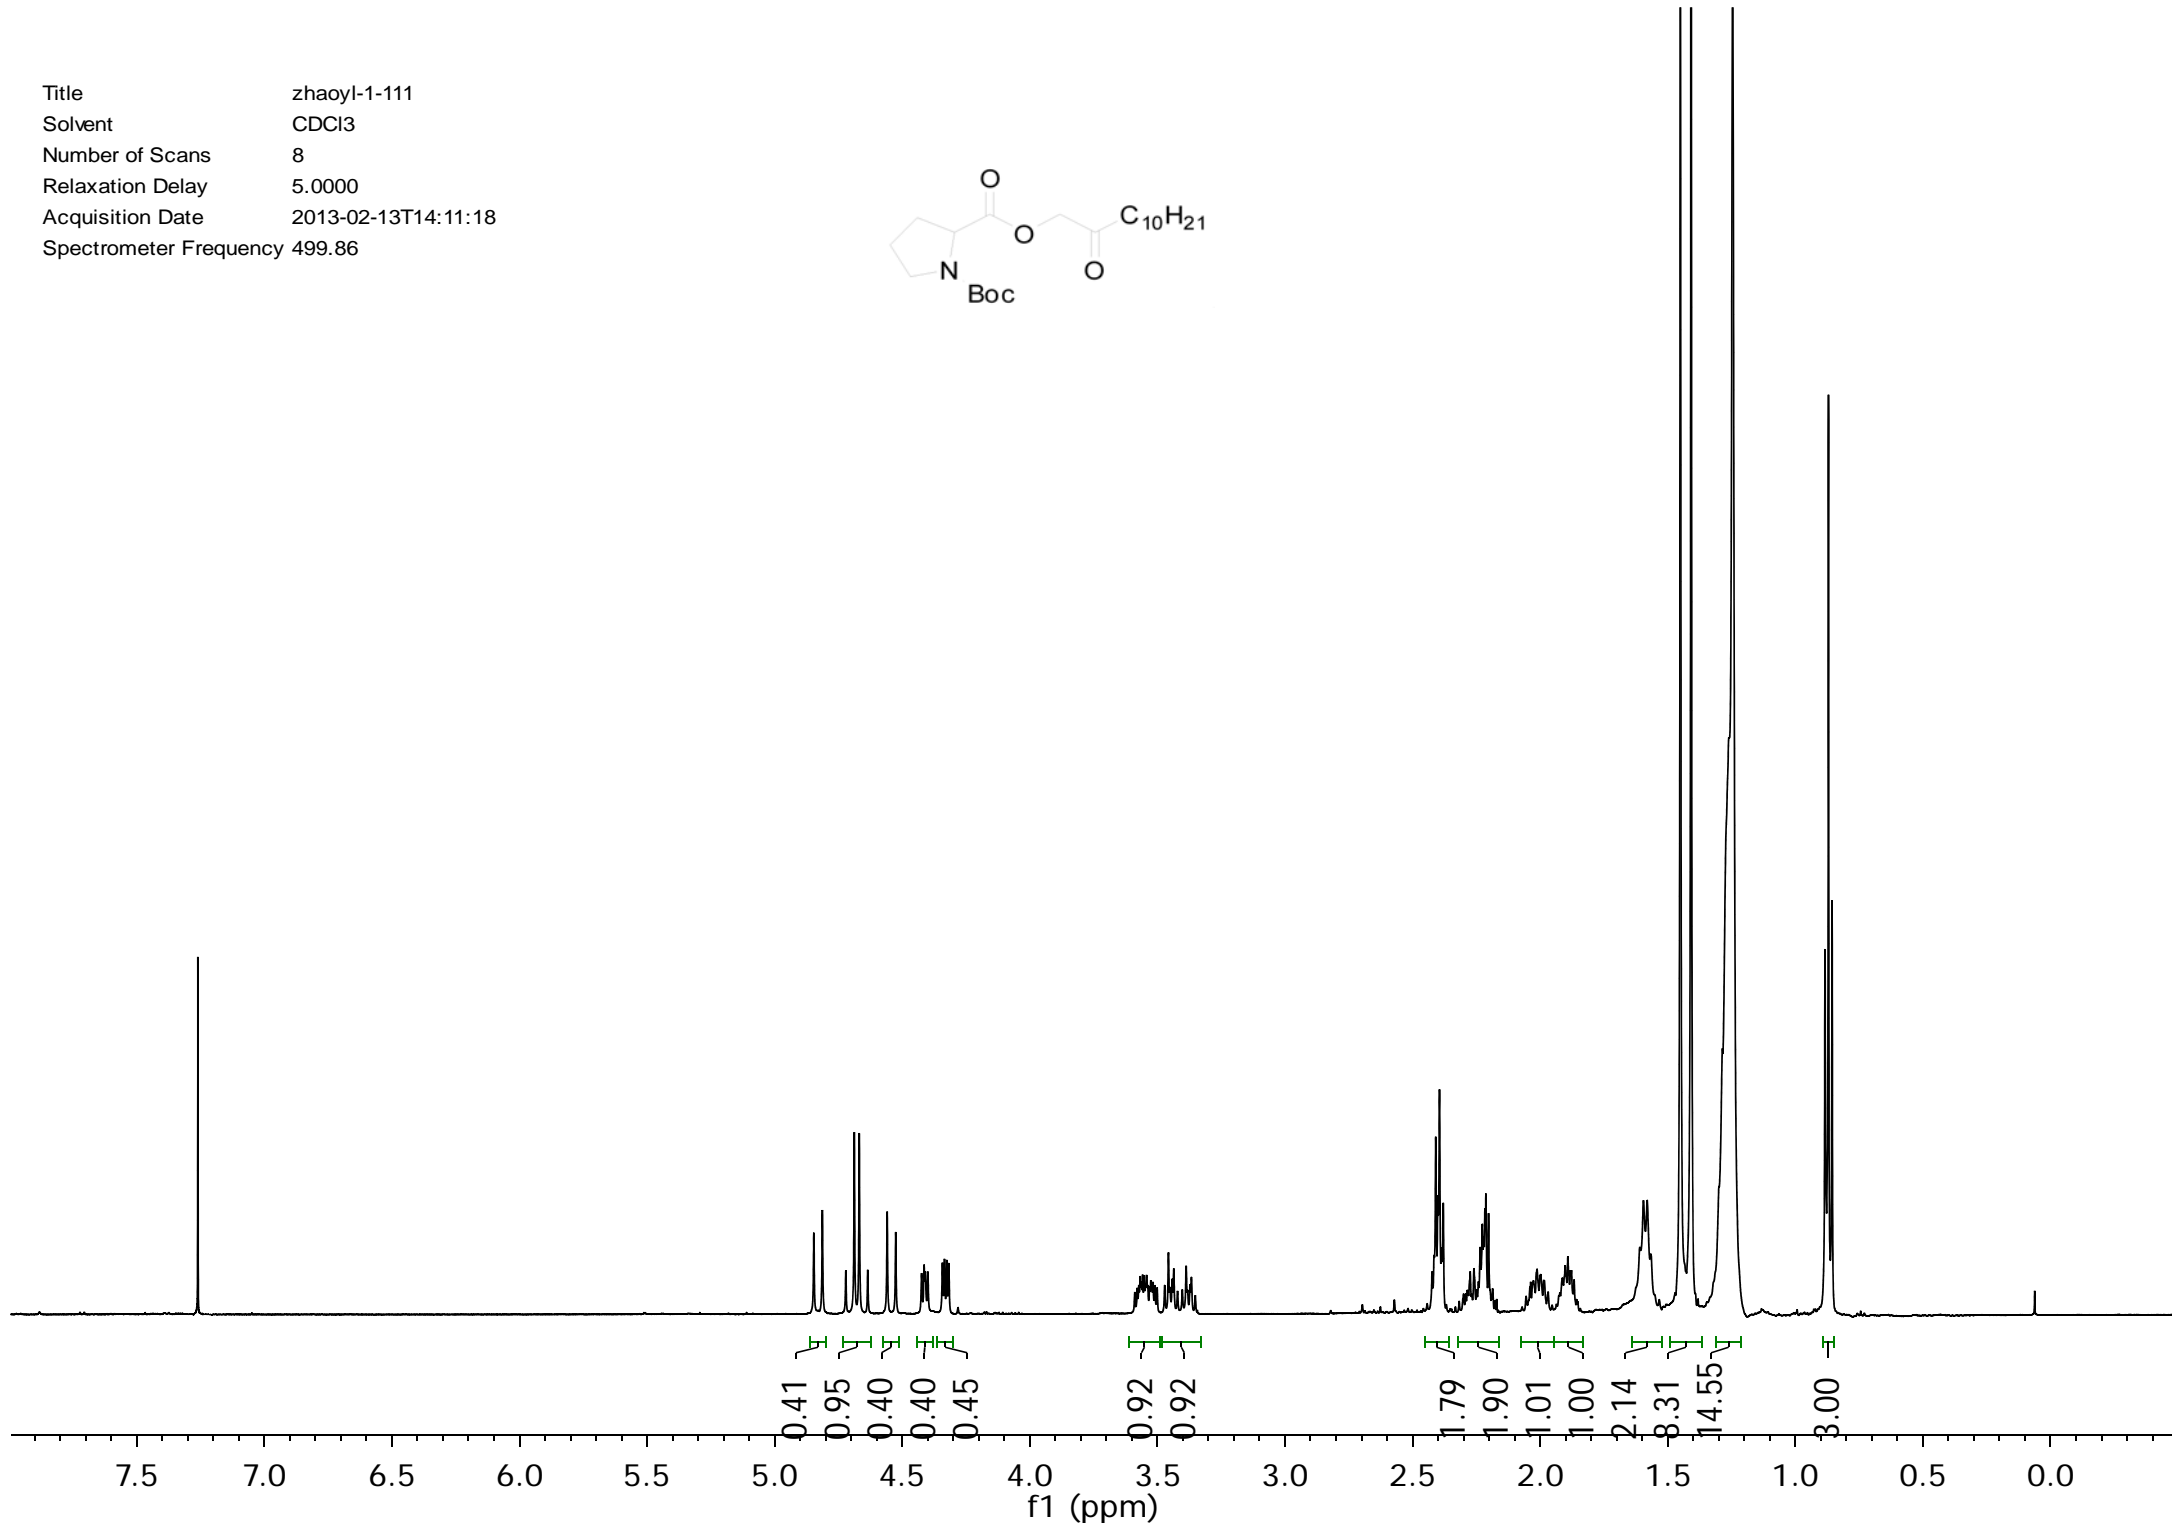



Title zhaoyl-1-111-C  
Solvent CDCl3  
Number of Scans 408  
Relaxation Delay 1.0000  
Acquisition Date 2011-02-18T15:19:08  
Spectrometer Frequency 125.70

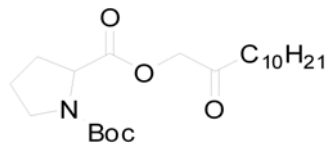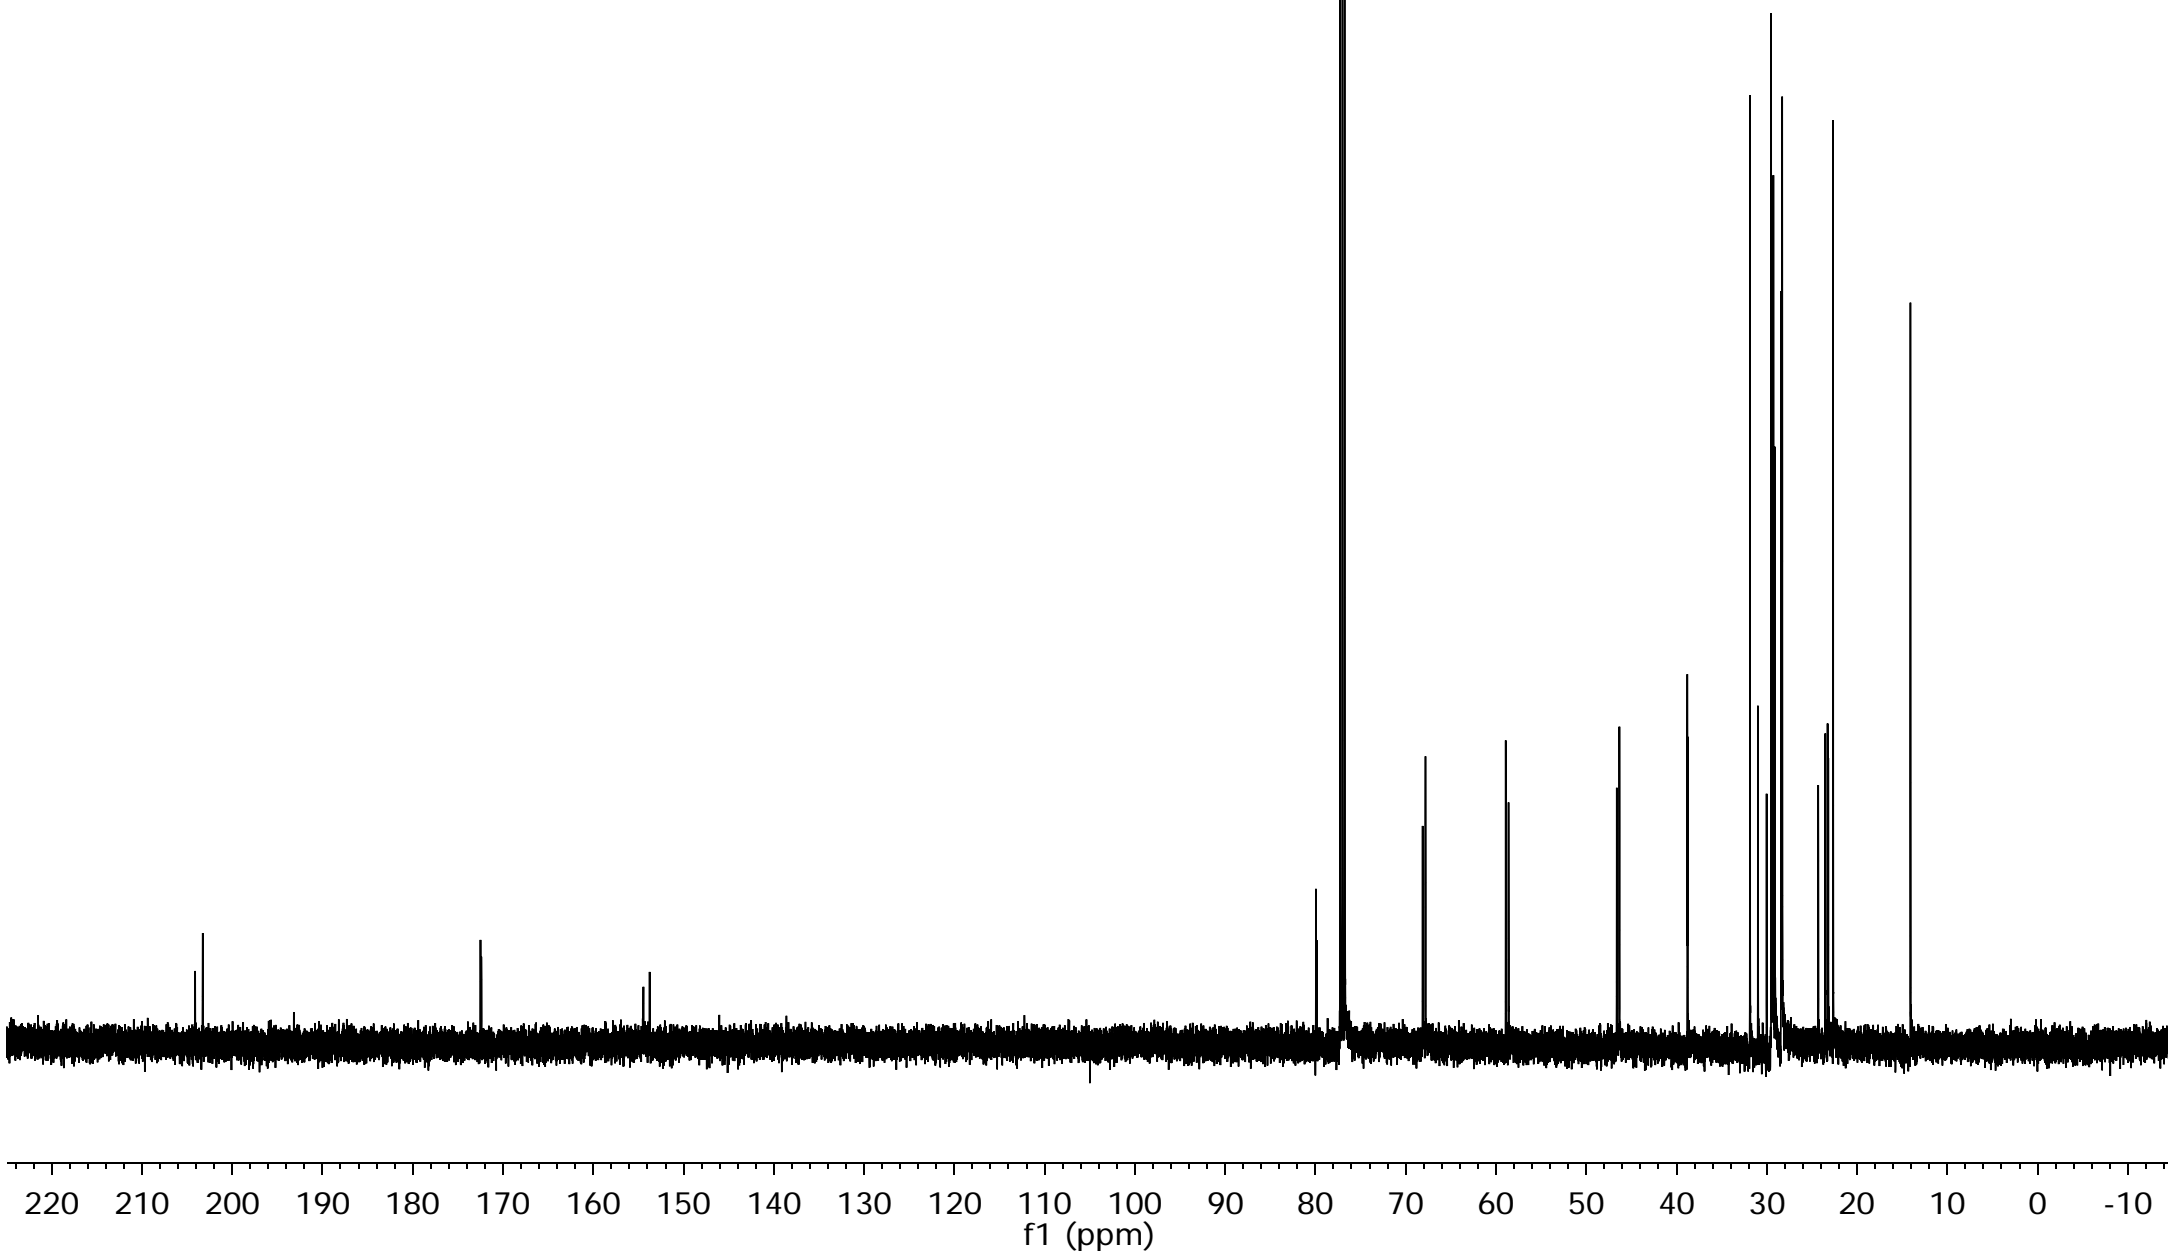

Title zhaoyl-1-99  
Solvent CDCl3  
Spectrometer Frequency 499.86

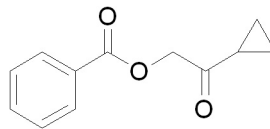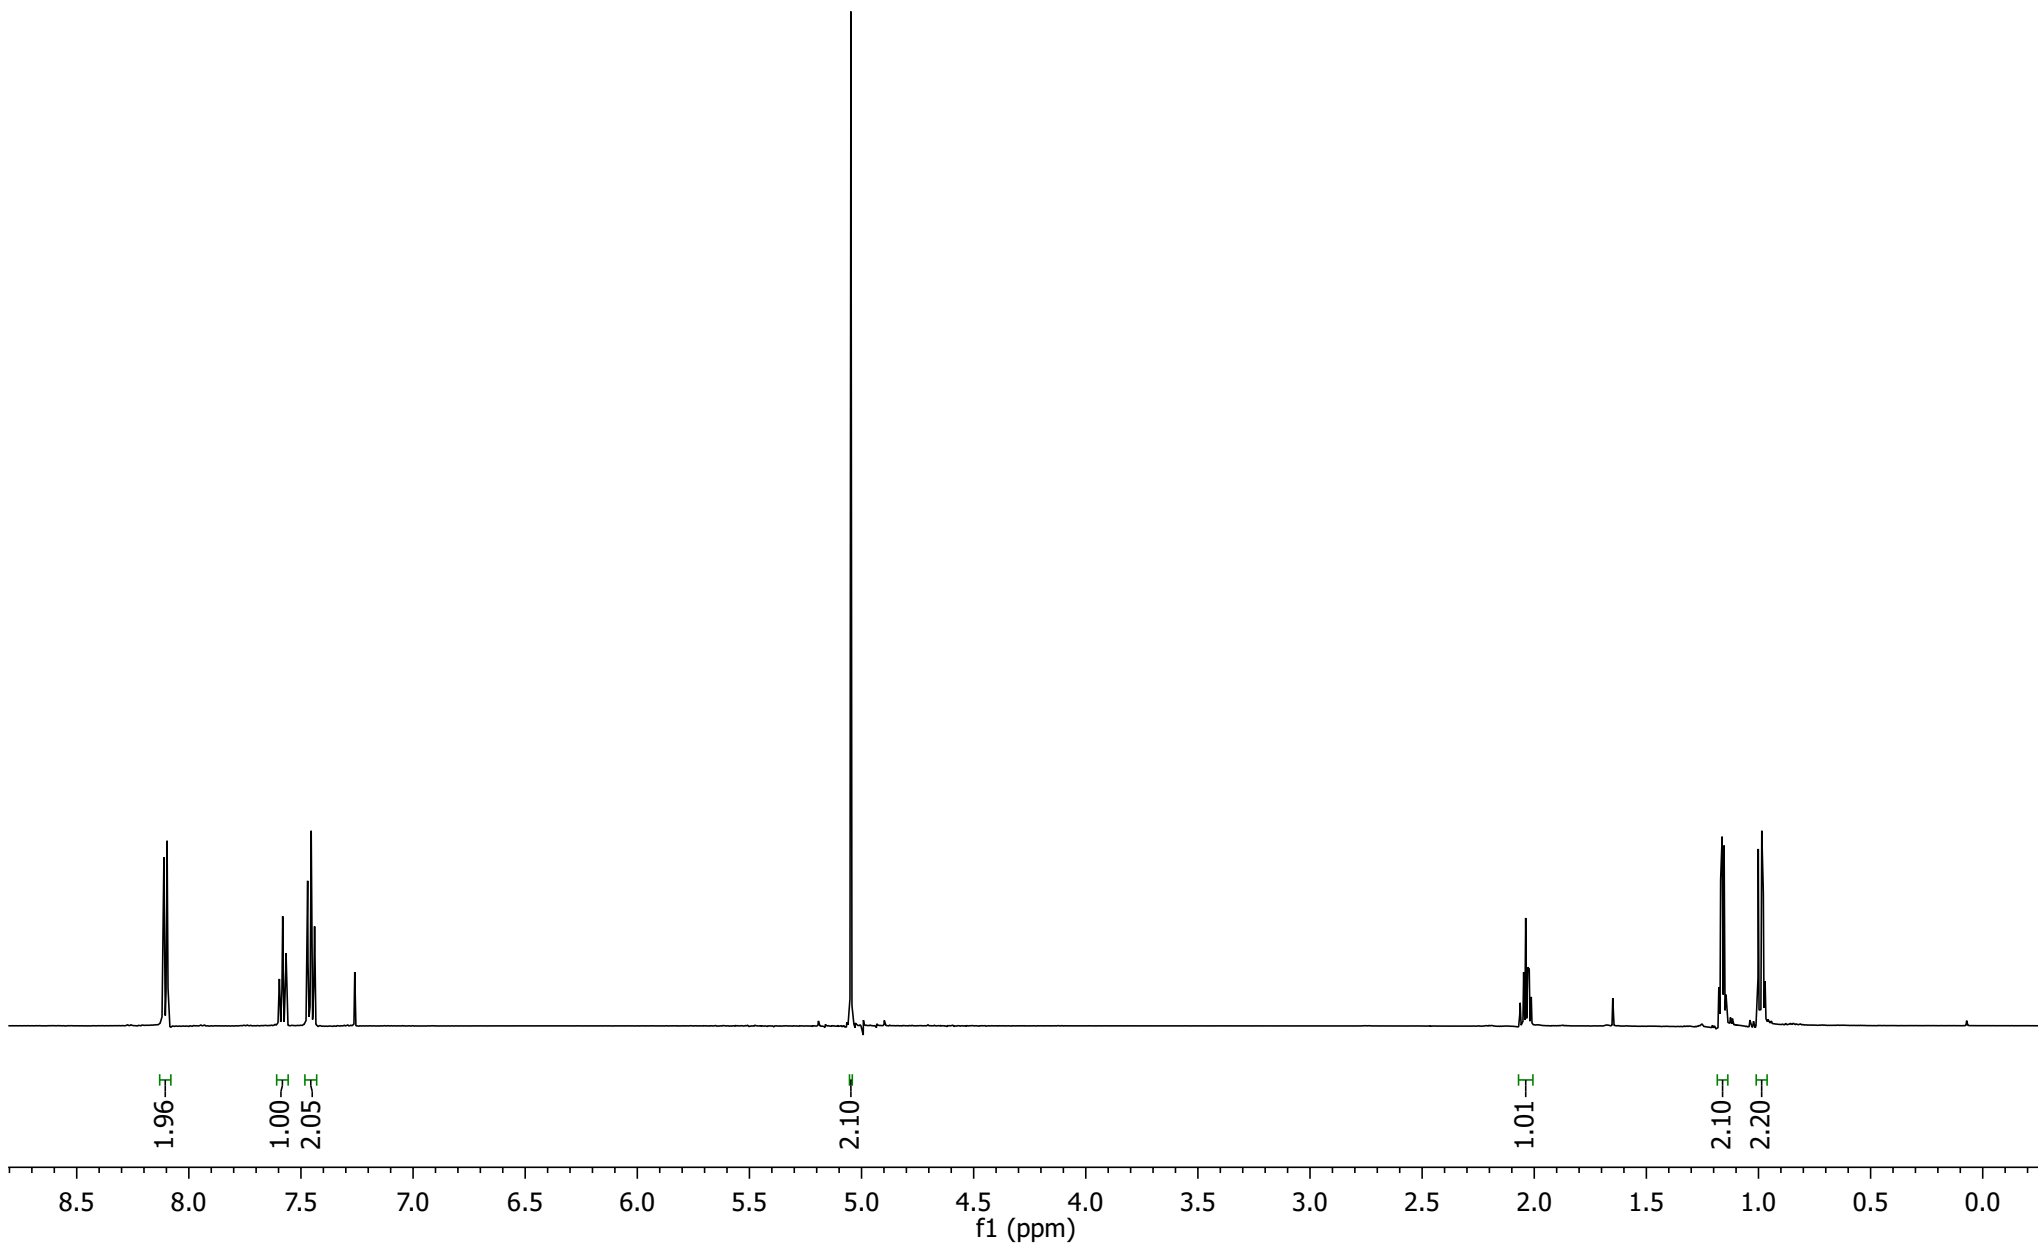

Title zhaoyl-1-99-C  
Solvent CDCl3  
Spectrometer Frequency 125.70

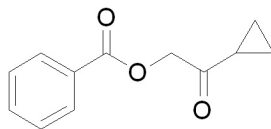

203.77

165.82

133.32

129.85

129.29

128.40

68.77

17.22

11.41

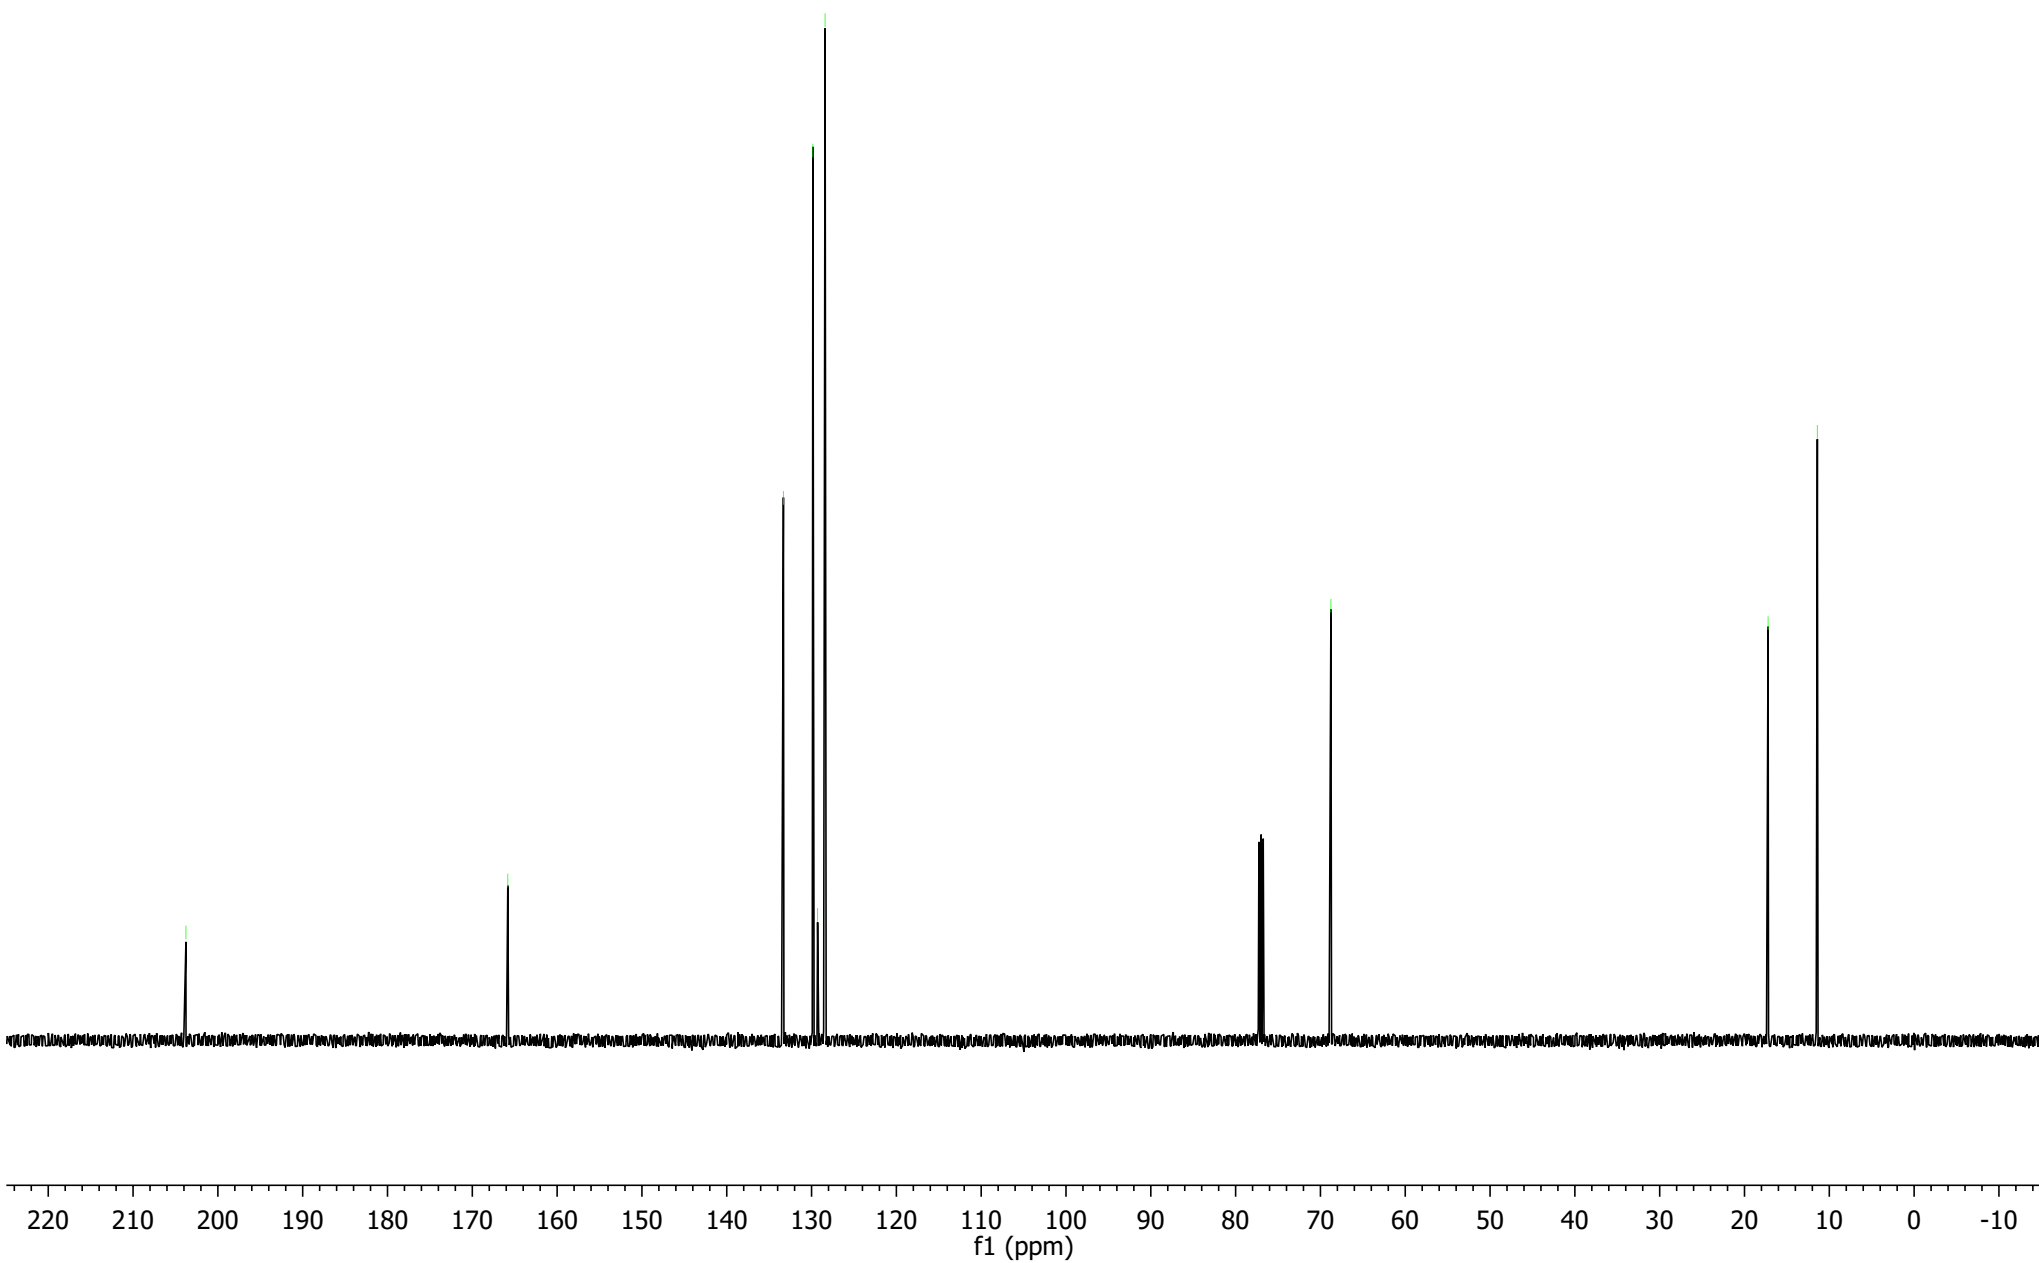

Title zhaoyl-1-95  
Solvent cdcl3  
Spectrometer Frequency 599.64

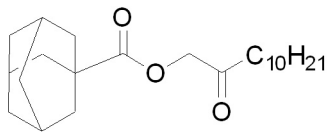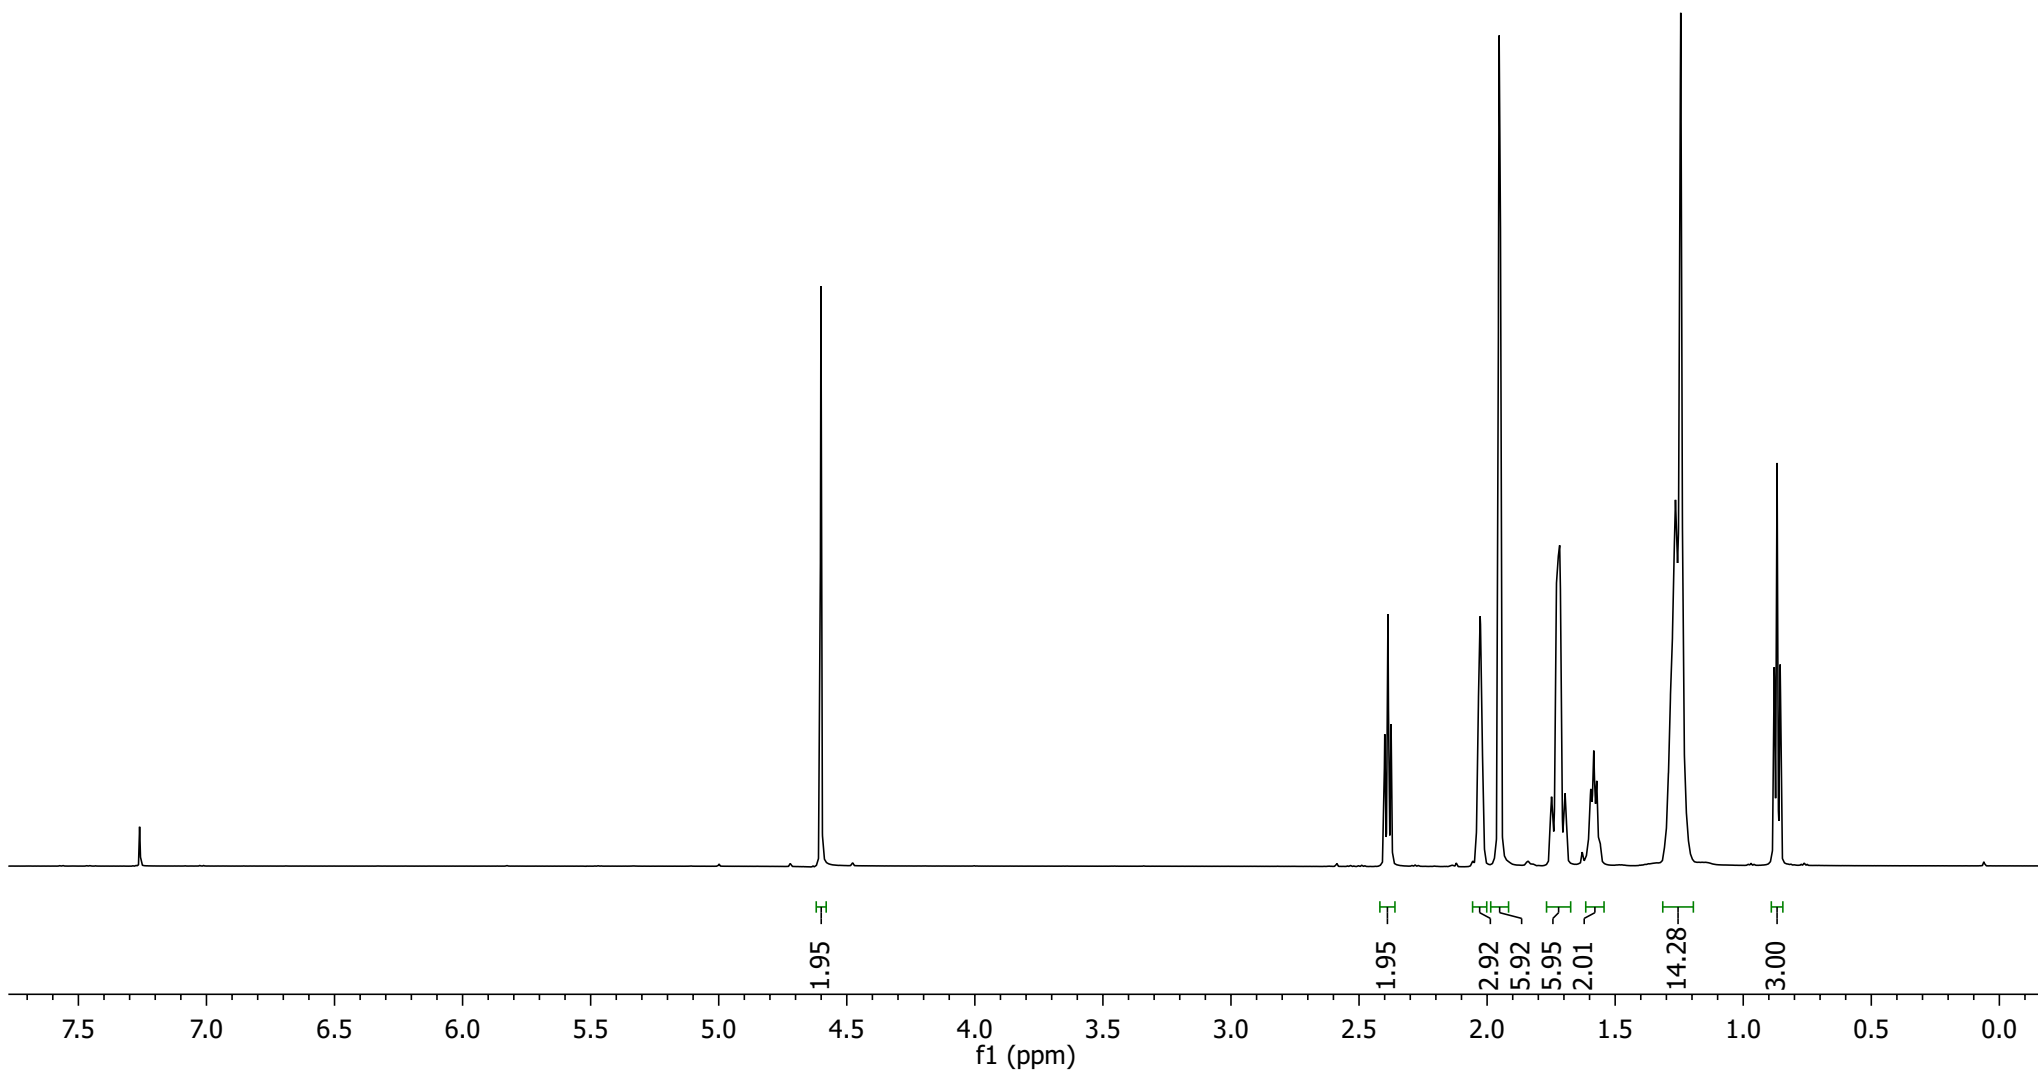

Title  
Solvent  
Spectrometer Frequency

204.49  
zhaoyl-1-95-C  
176.87

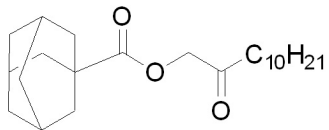

67.67  
40.66  
38.79  
38.75  
36.42  
31.85  
29.51  
29.38  
29.32  
29.25  
29.13  
27.86  
23.17  
22.64  
14.07

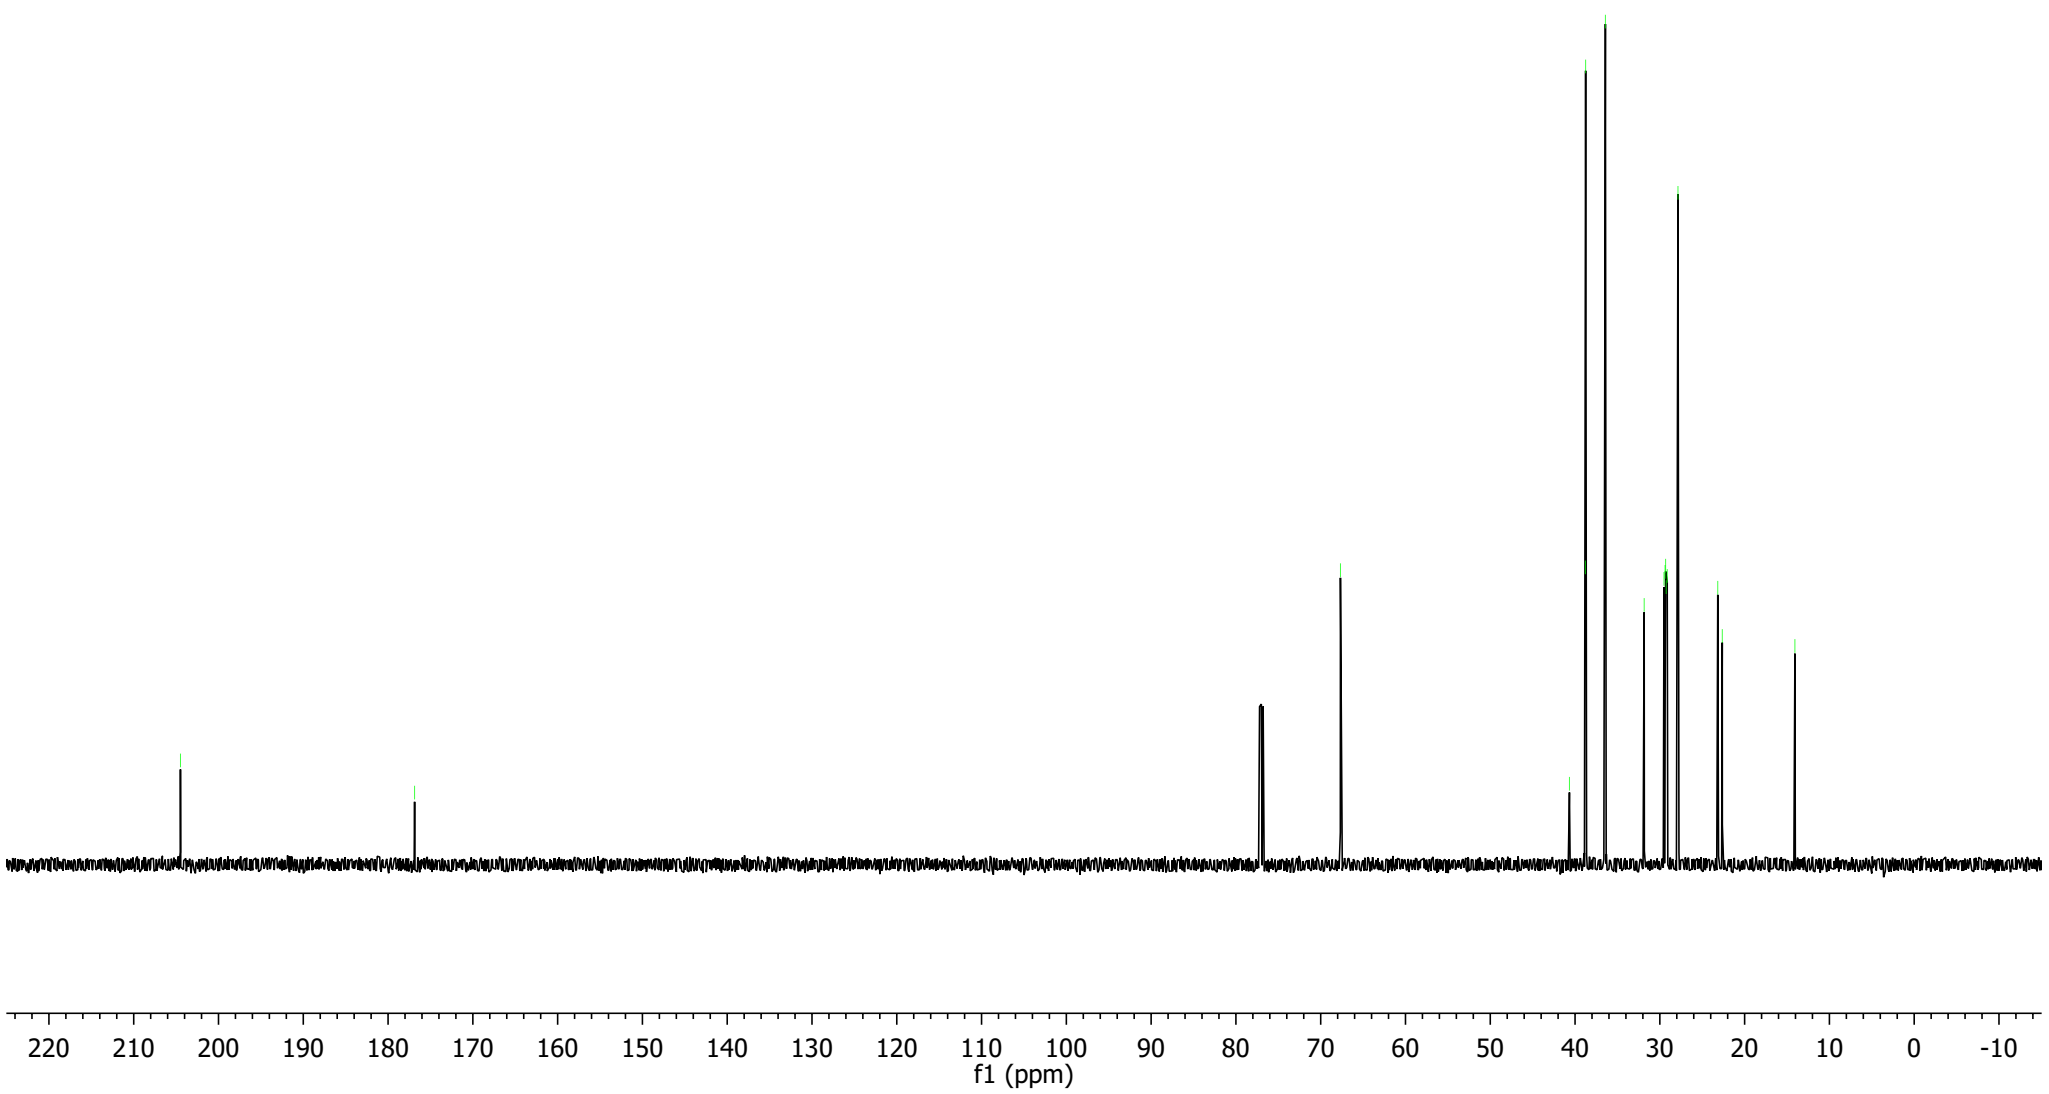

Title zhaoyl-1-97-1  
Solvent CDCl3  
Spectrometer Frequency 499.86

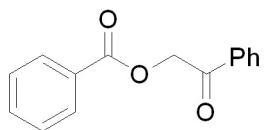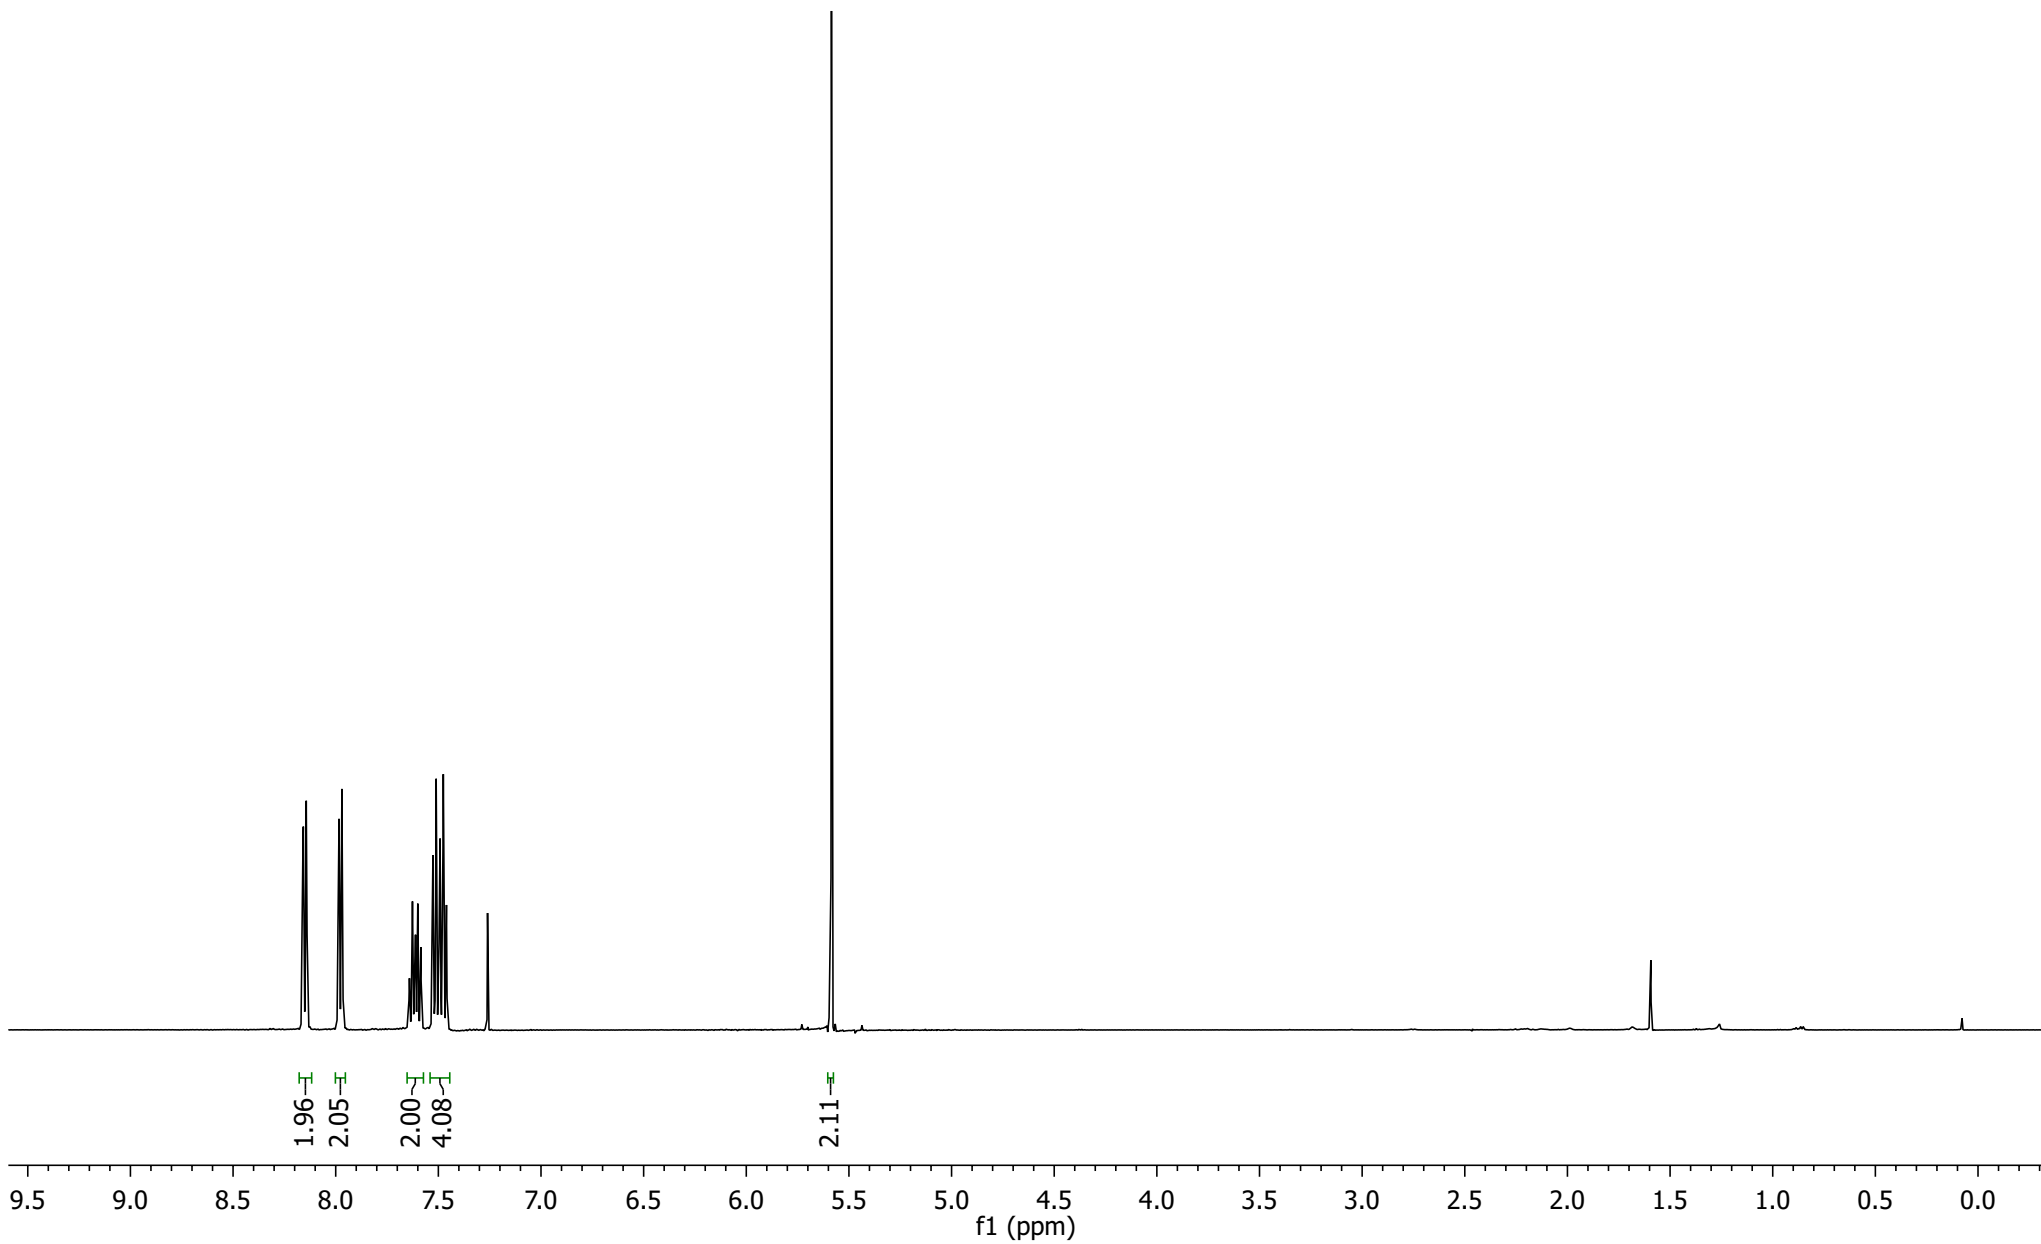

Title zhaoyl-1-97-1-C  
Solvent CDCl3  
Spectrometer Frequency 125.70

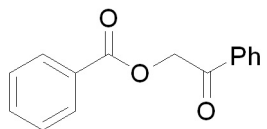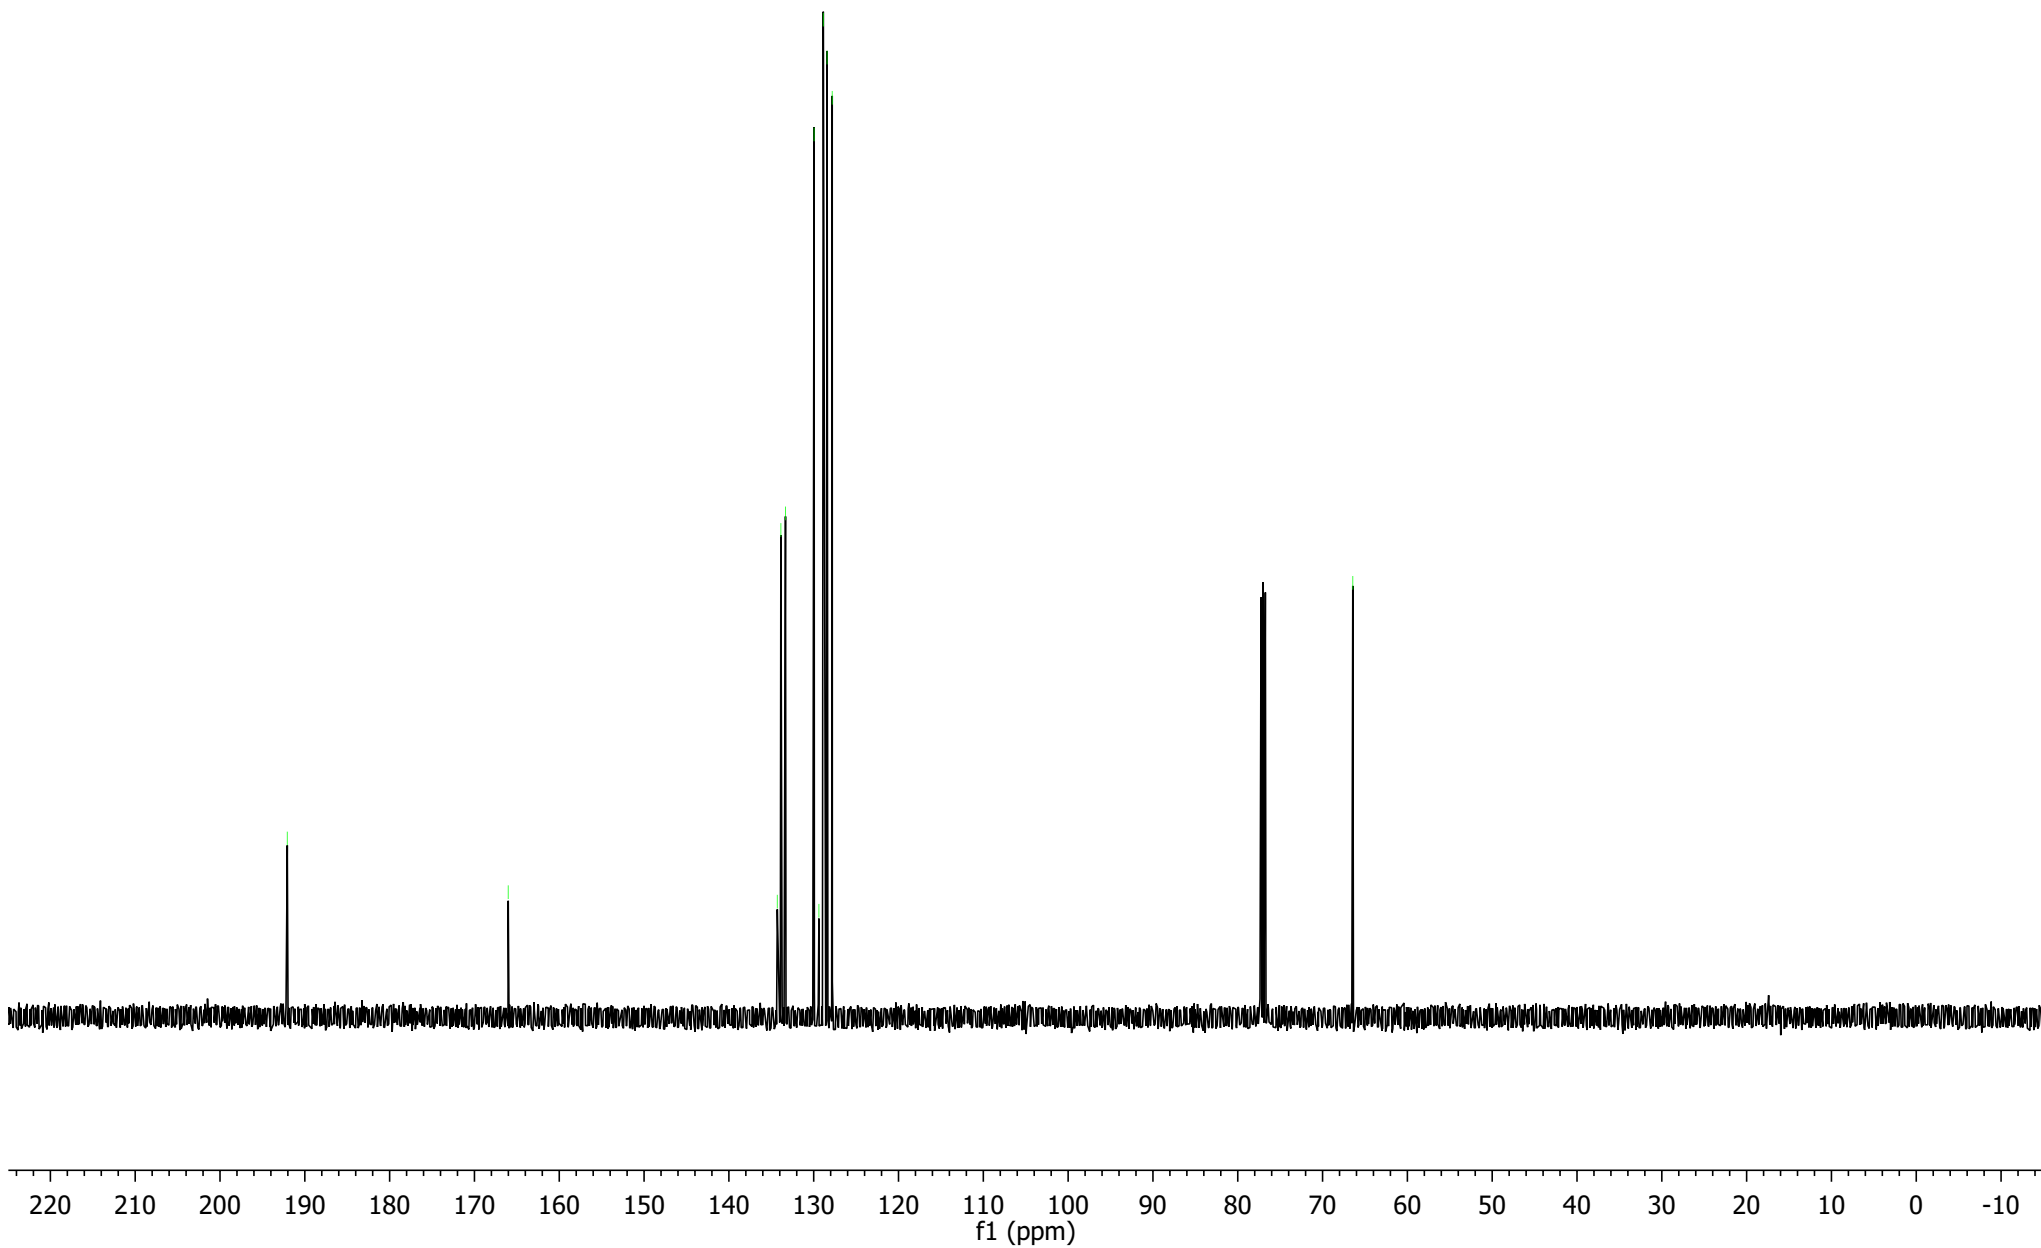

Title zhaoyl-1-100-1  
Solvent CDCl3  
Spectrometer Frequency 499.86

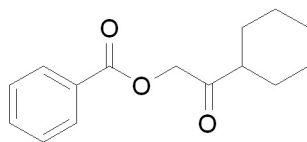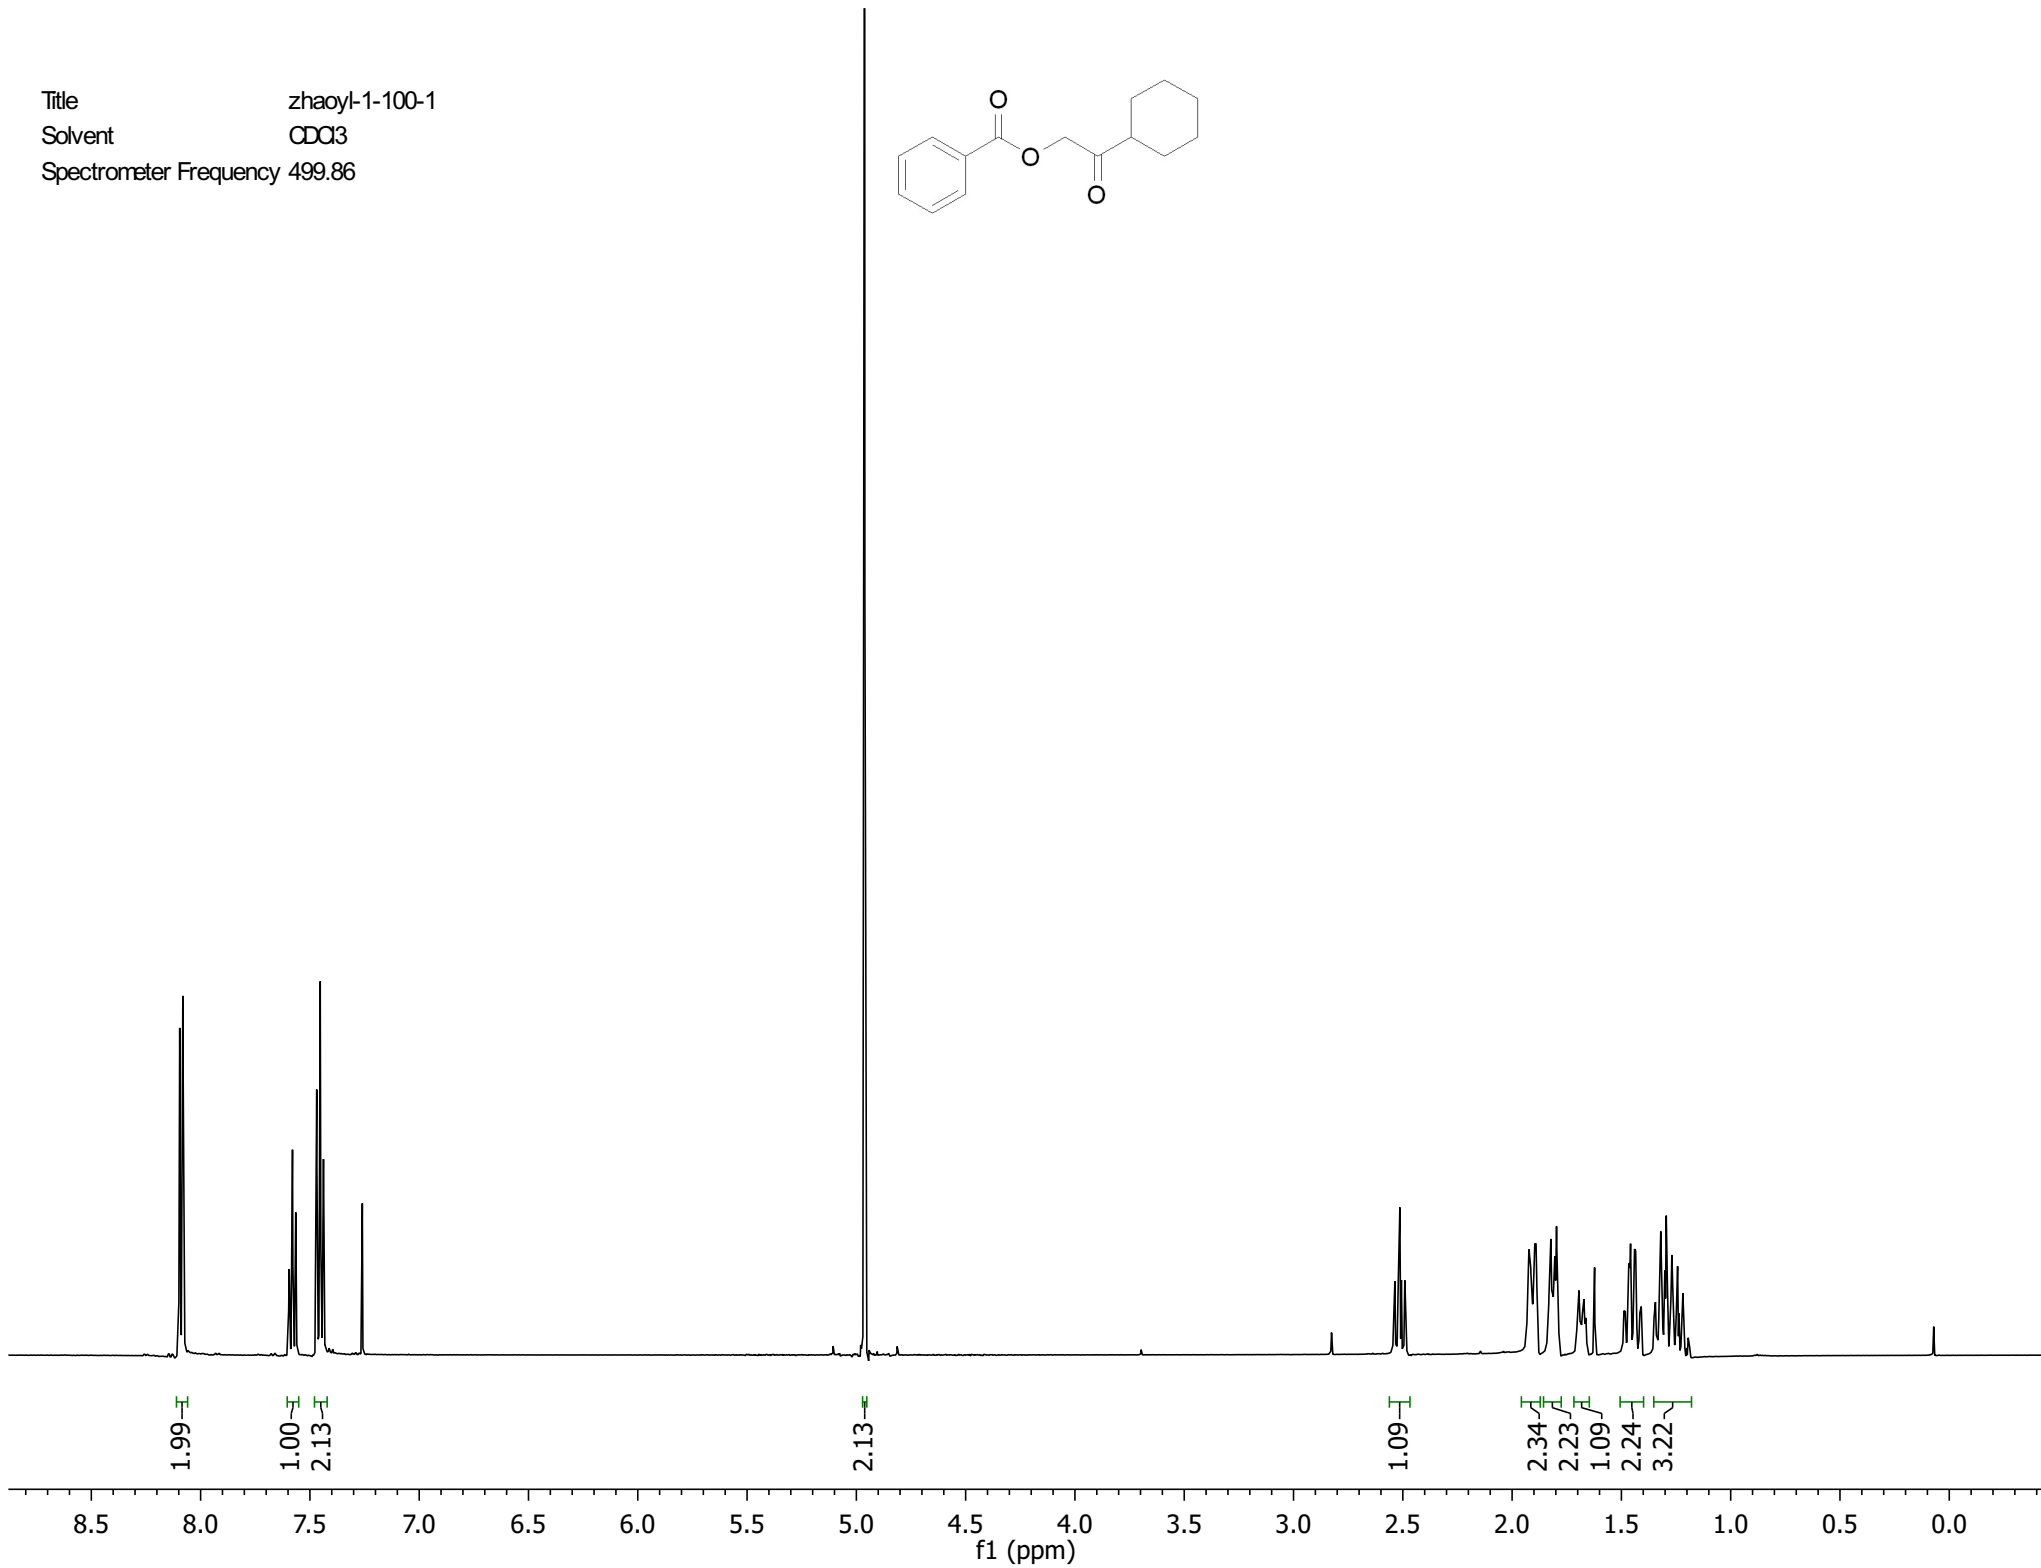



Title zhaoyl-1-100-C  
Solvent CDCl3  
Spectrometer Frequency 125.70

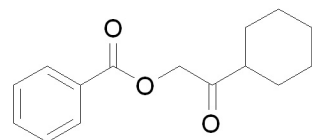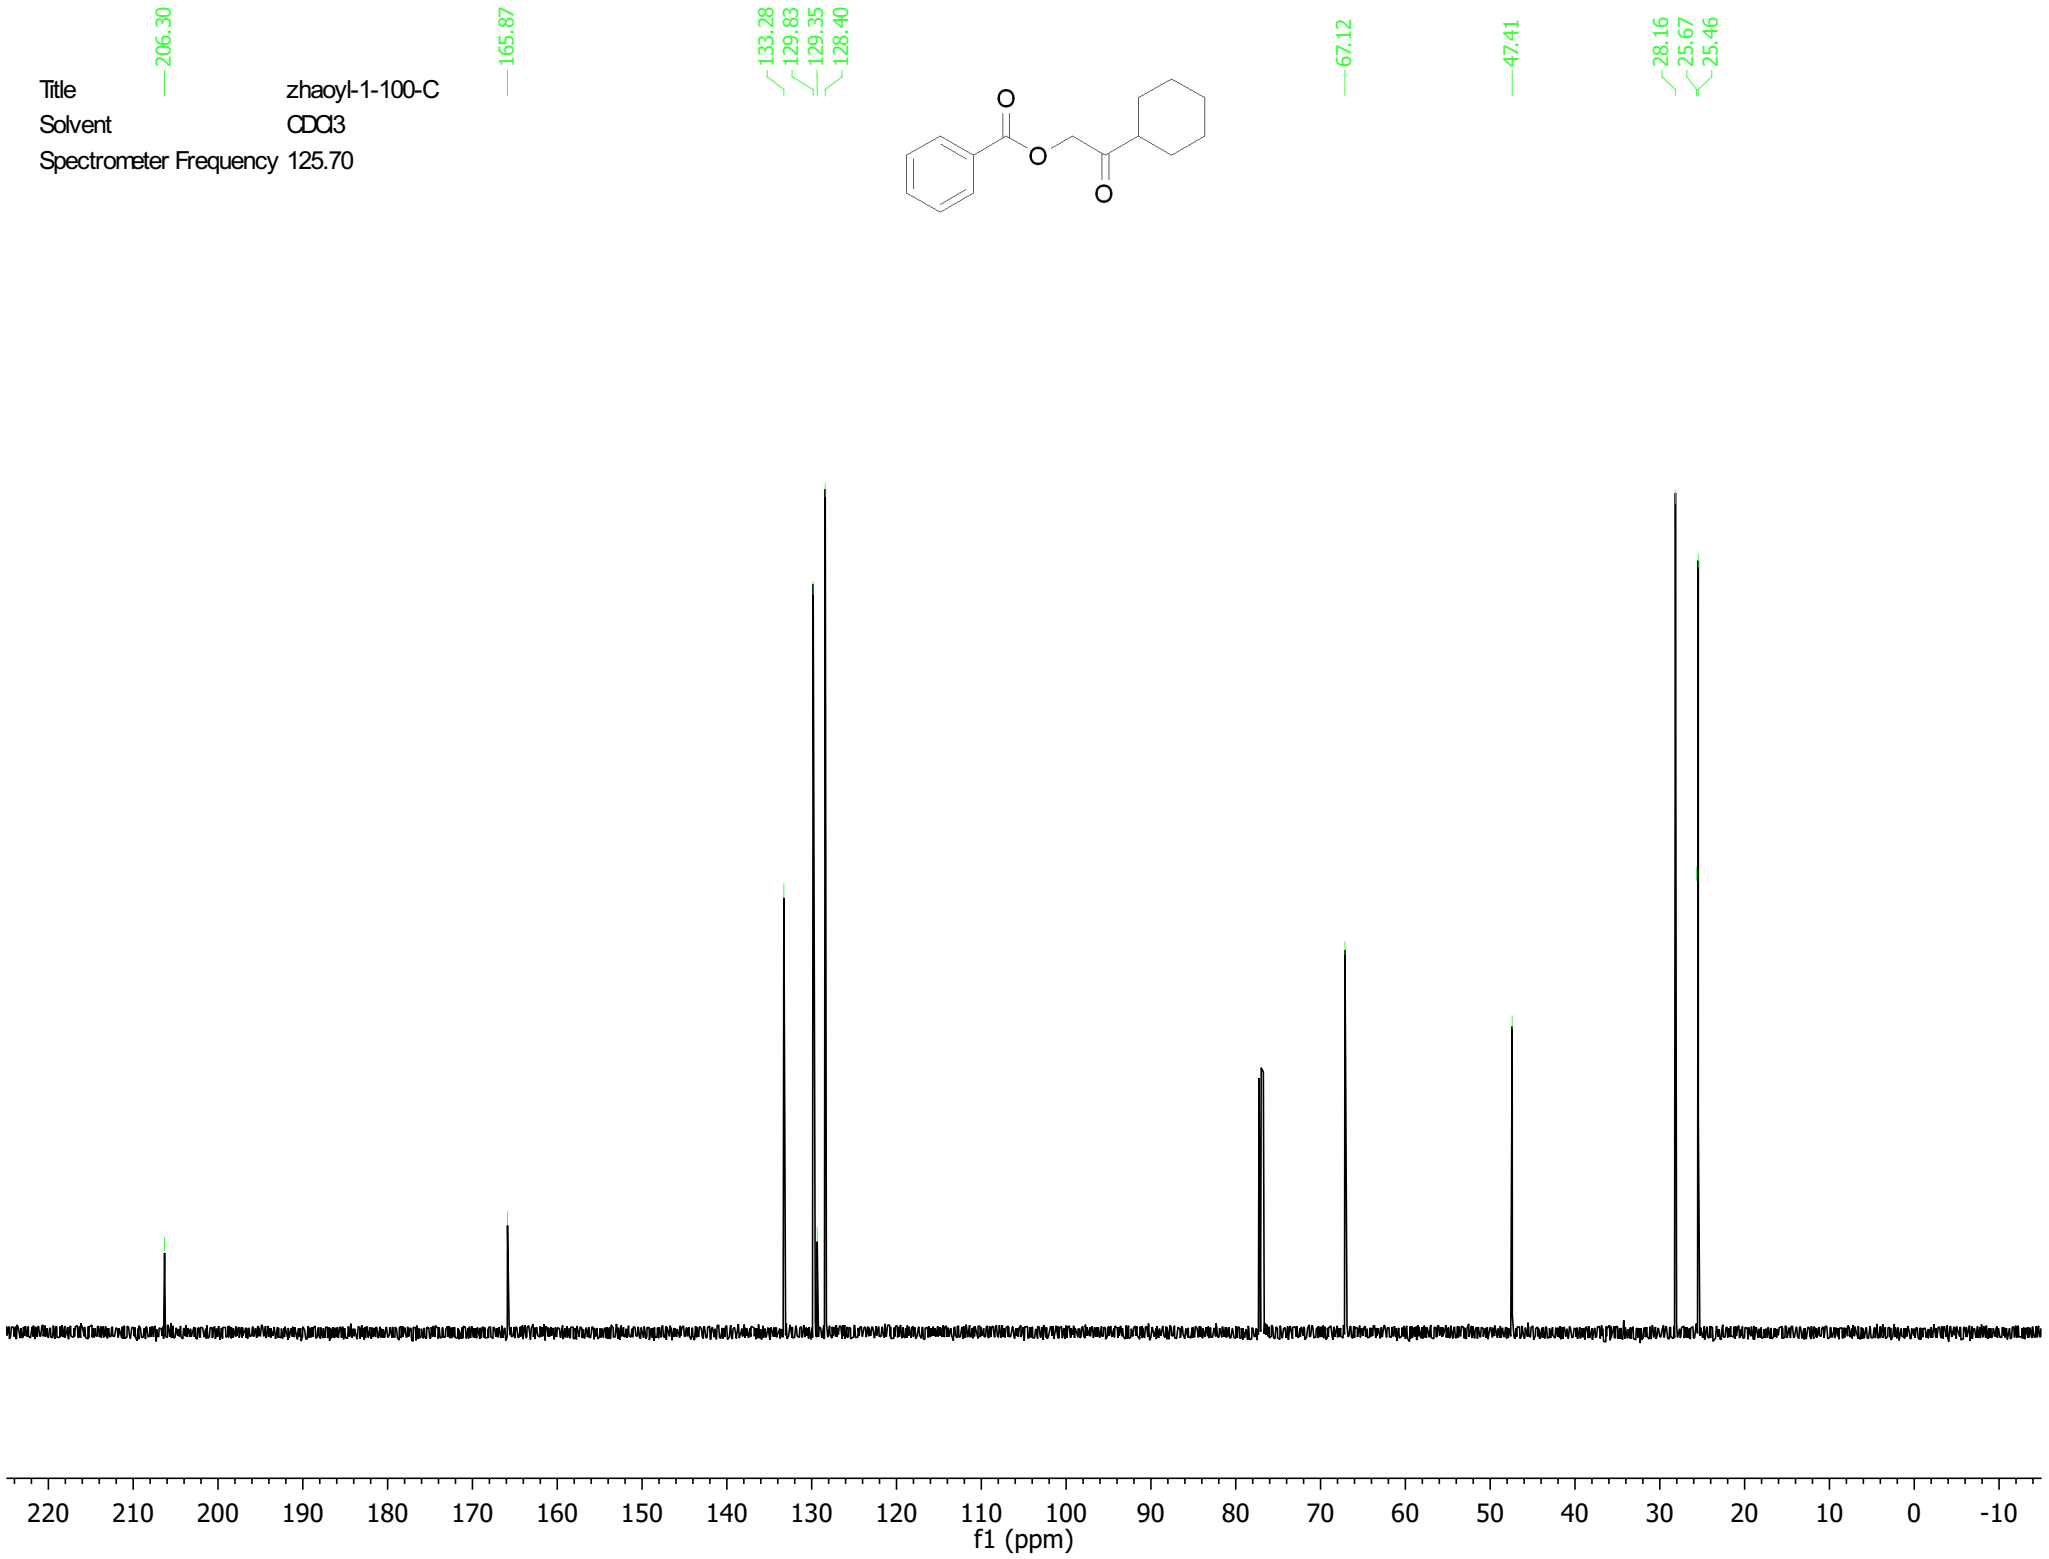

Title zhaoyl-1-94-1  
Solvent CDCl3  
Spectrometer Frequency 499.86

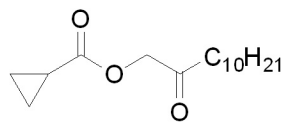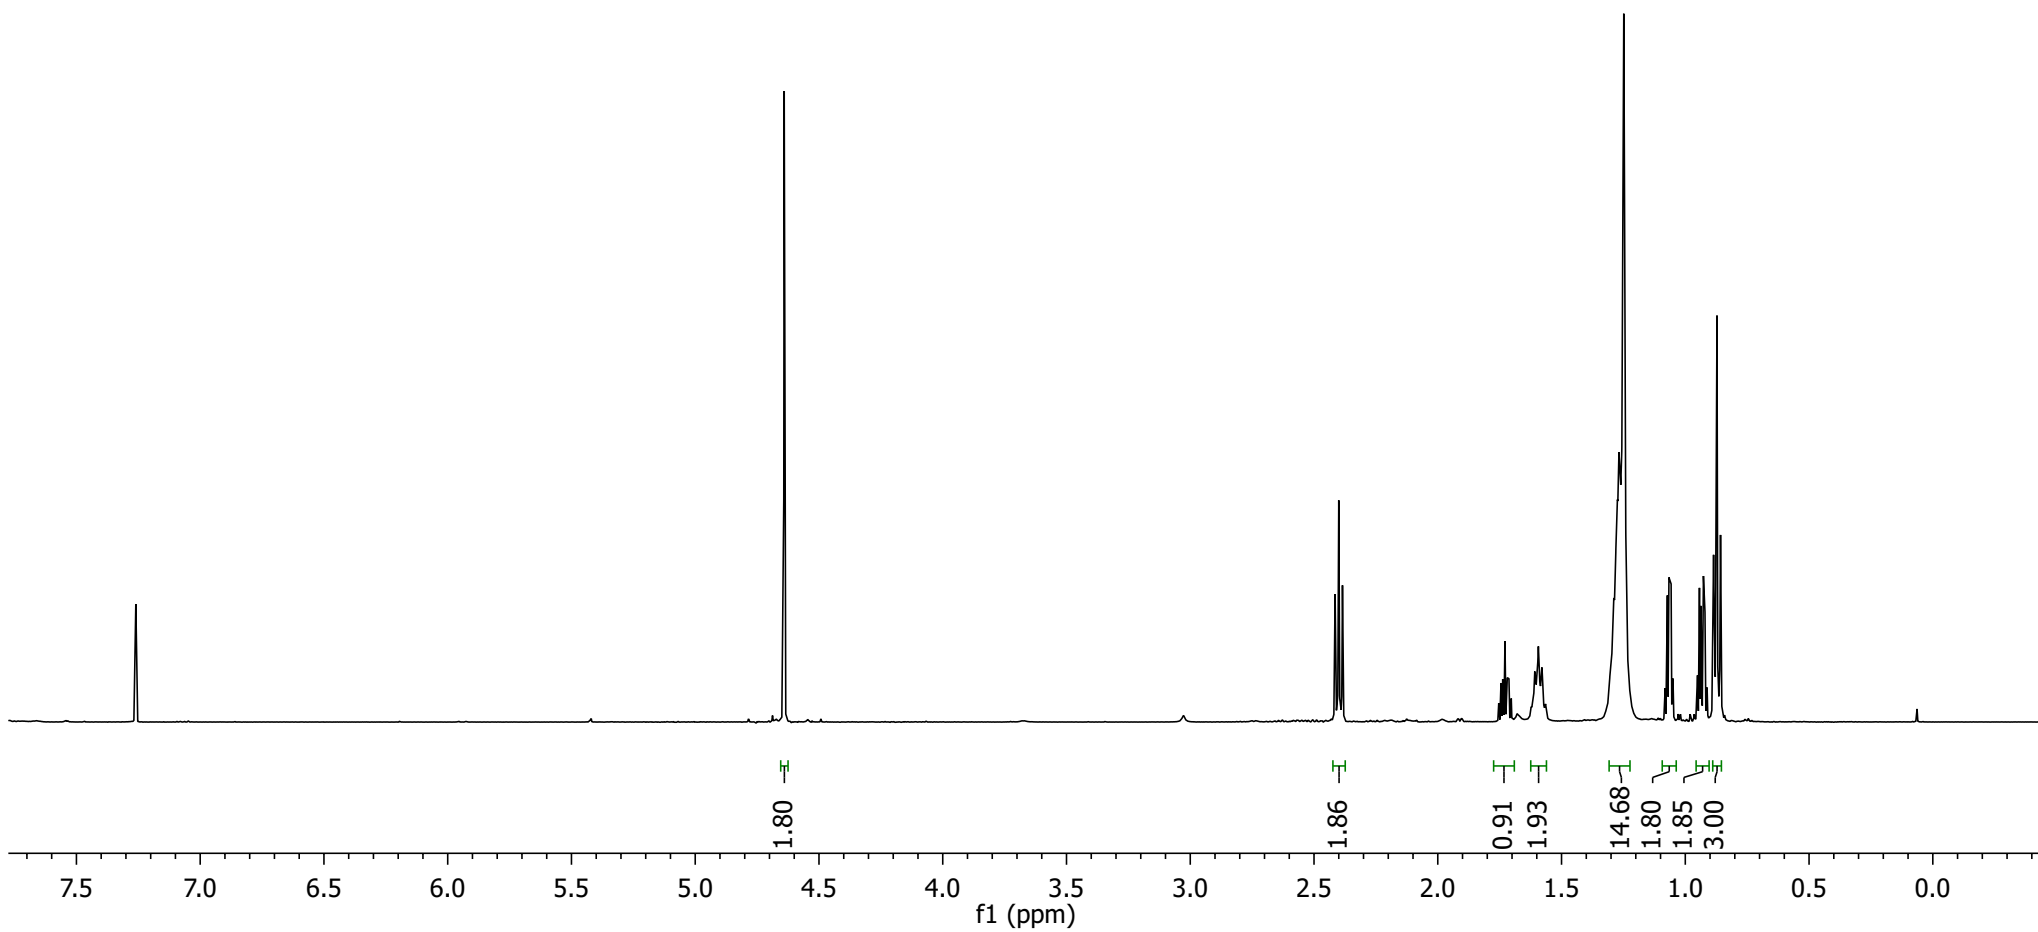

Title  
Solvent  
Spectrometer Frequency 125.70

zhaoyl-1-94-C  
CDCl3

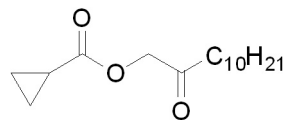

204.34  
174.19  
67.90  
38.81  
31.86  
29.52  
29.40  
29.31  
29.27  
29.13  
22.68  
17.68  
12.59  
8.87

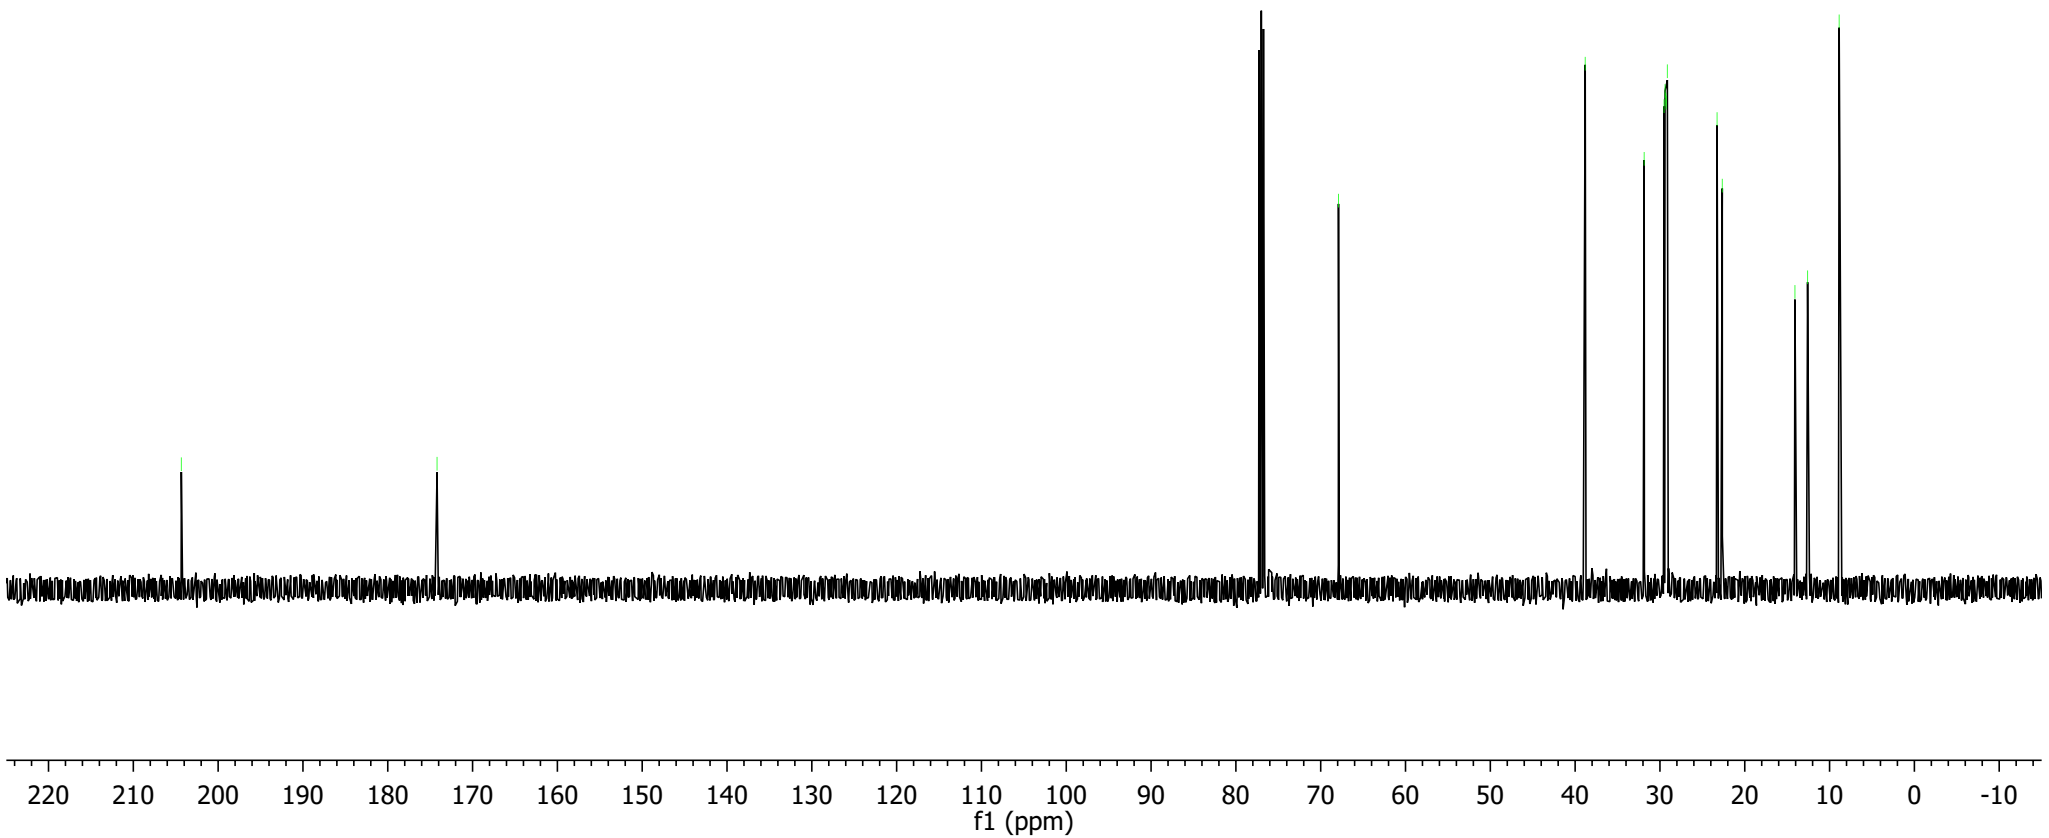

Title zhaoyl-1-198-2  
Solvent CDCl3  
Spectrometer Frequency 499.86

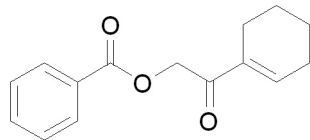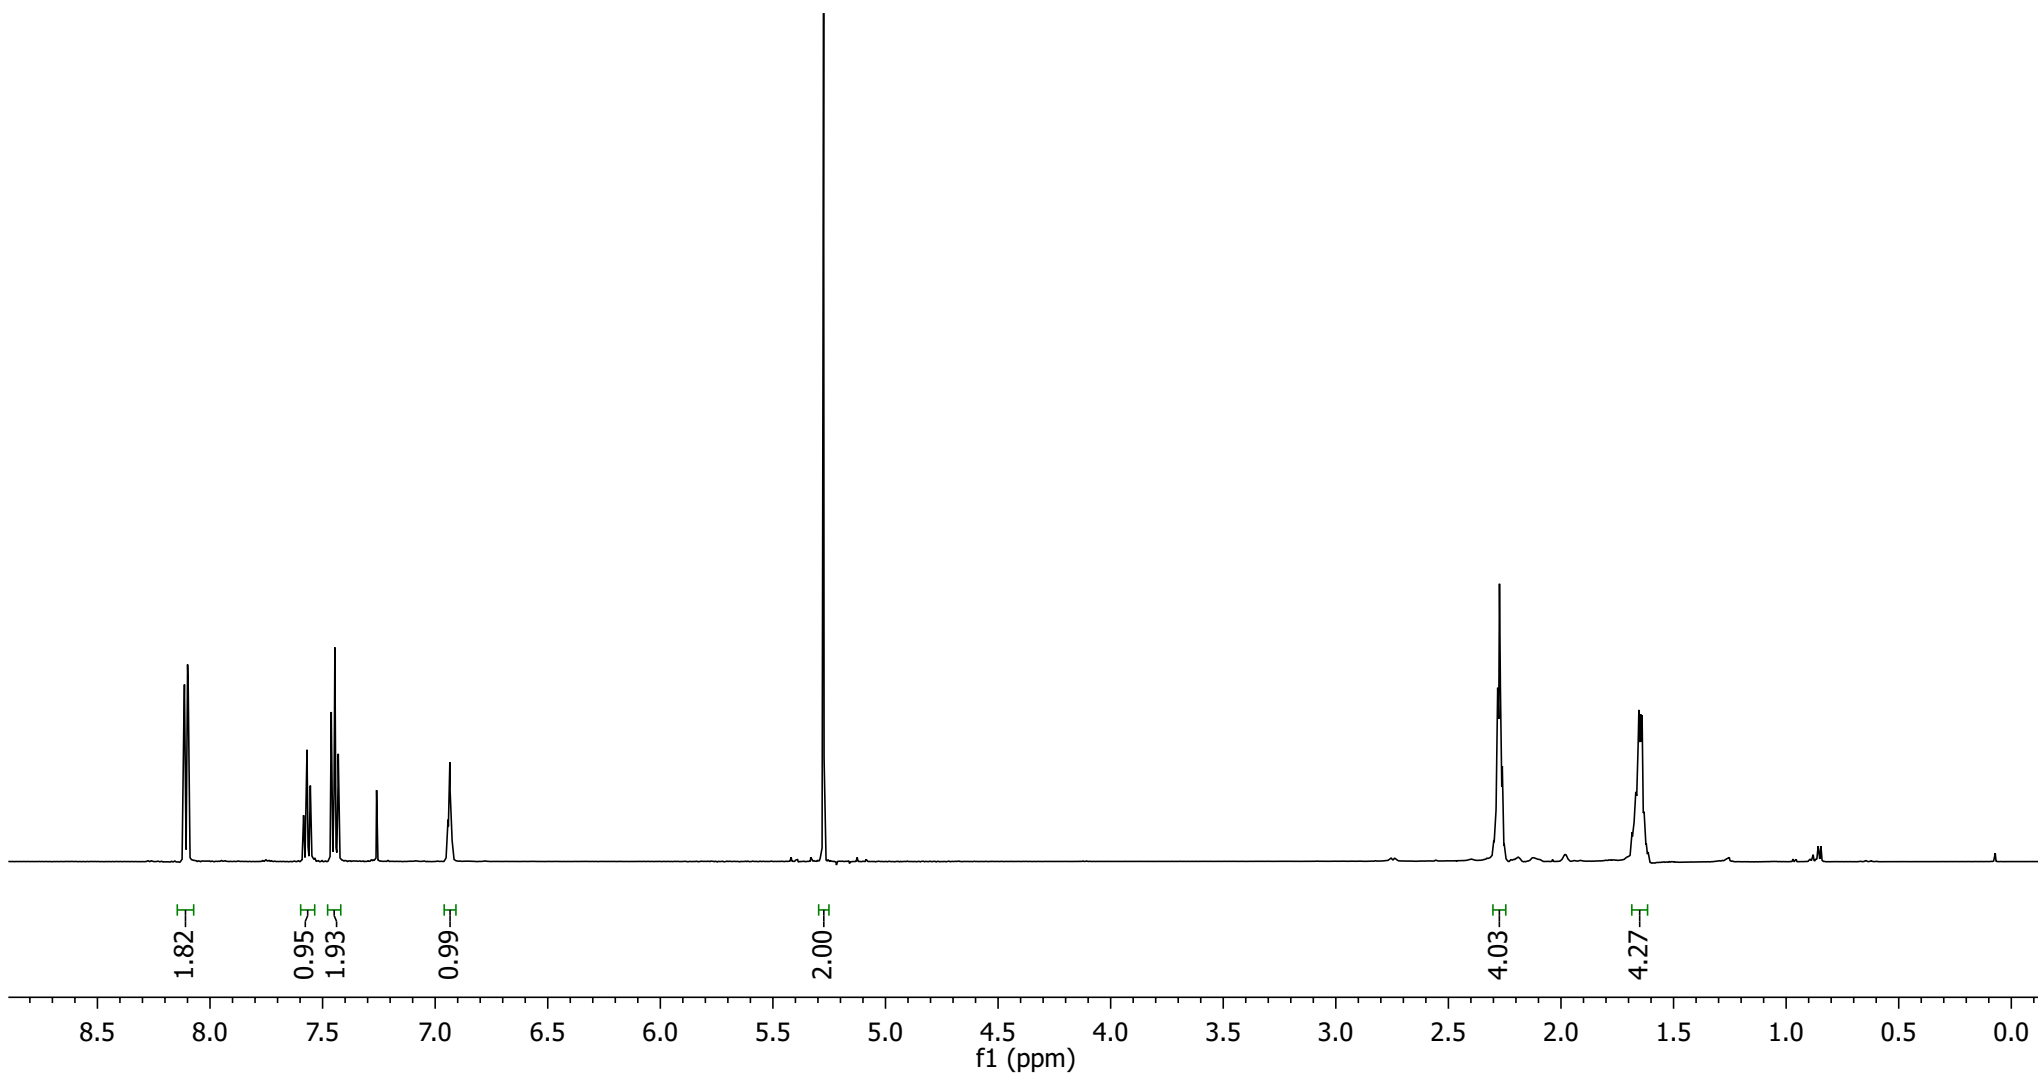

Title zhaoyl-1-98-C  
Solvent CDCl3  
Spectrometer Frequency 125.70

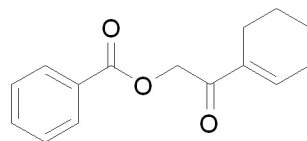

192.45

166.15

140.69

137.28

133.17

129.89

129.59

128.35

65.57

26.04

22.83

21.66

21.46

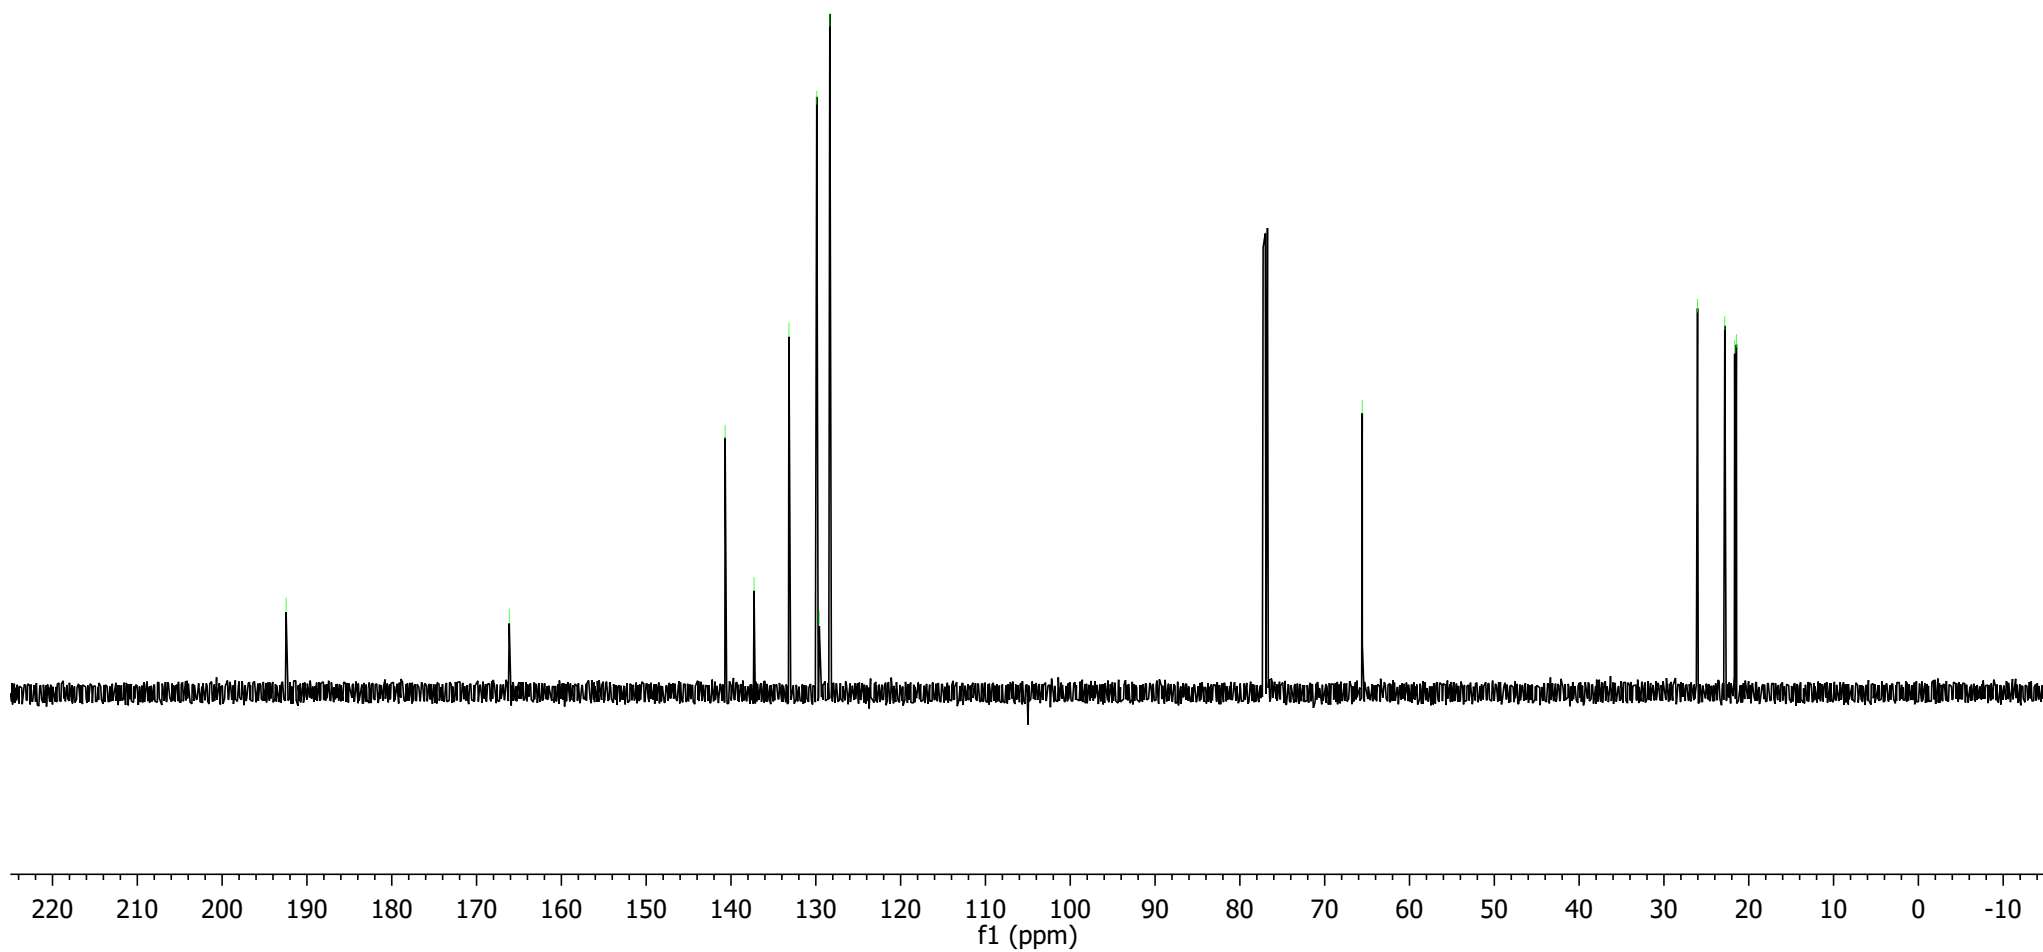

Title zhaoyl-1-101  
Solvent CDCl3  
Spectrometer Frequency 499.86

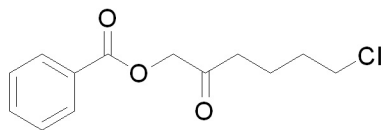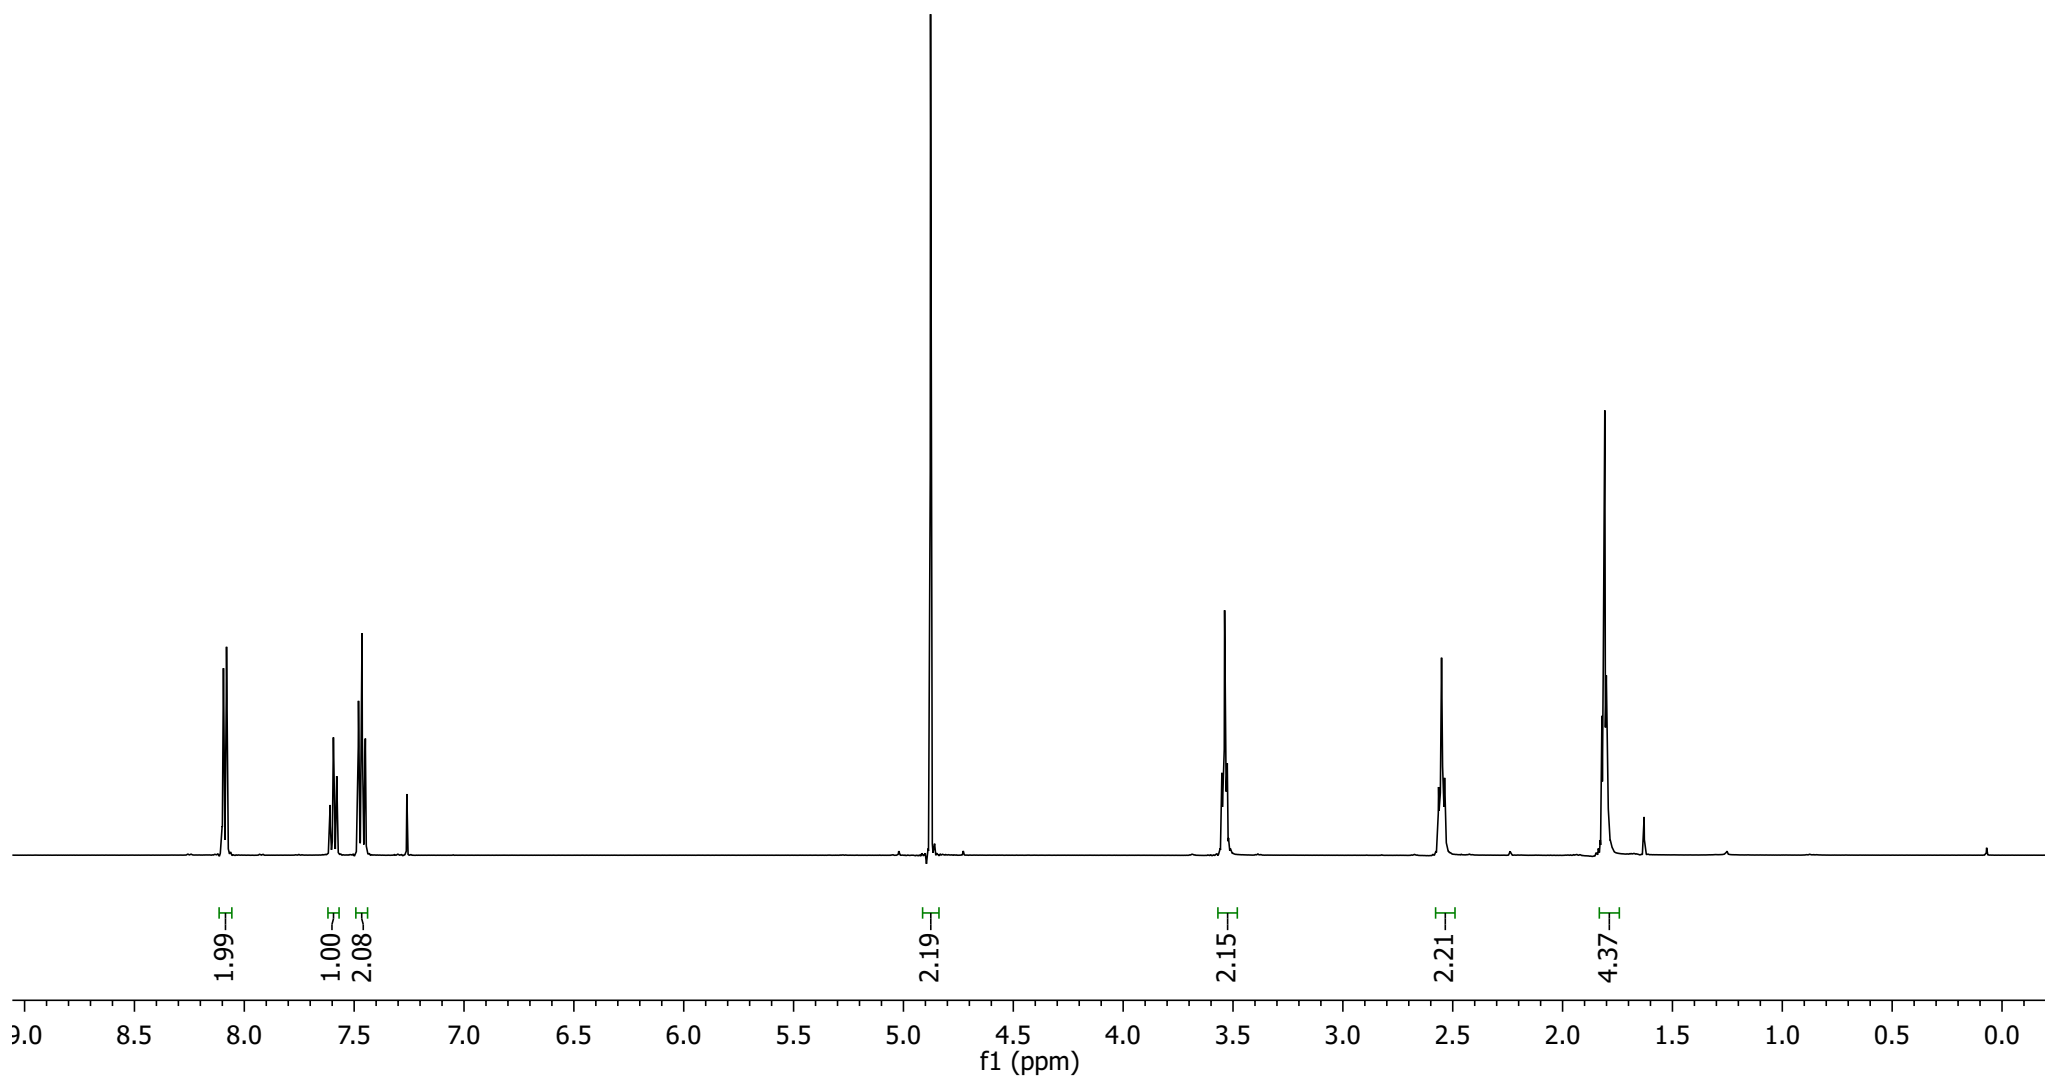

Title zhaoyl-1-101-C  
Solvent CDCl3  
Spectrometer Frequency 125.70

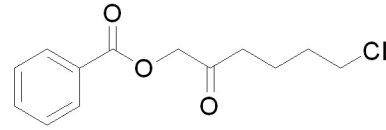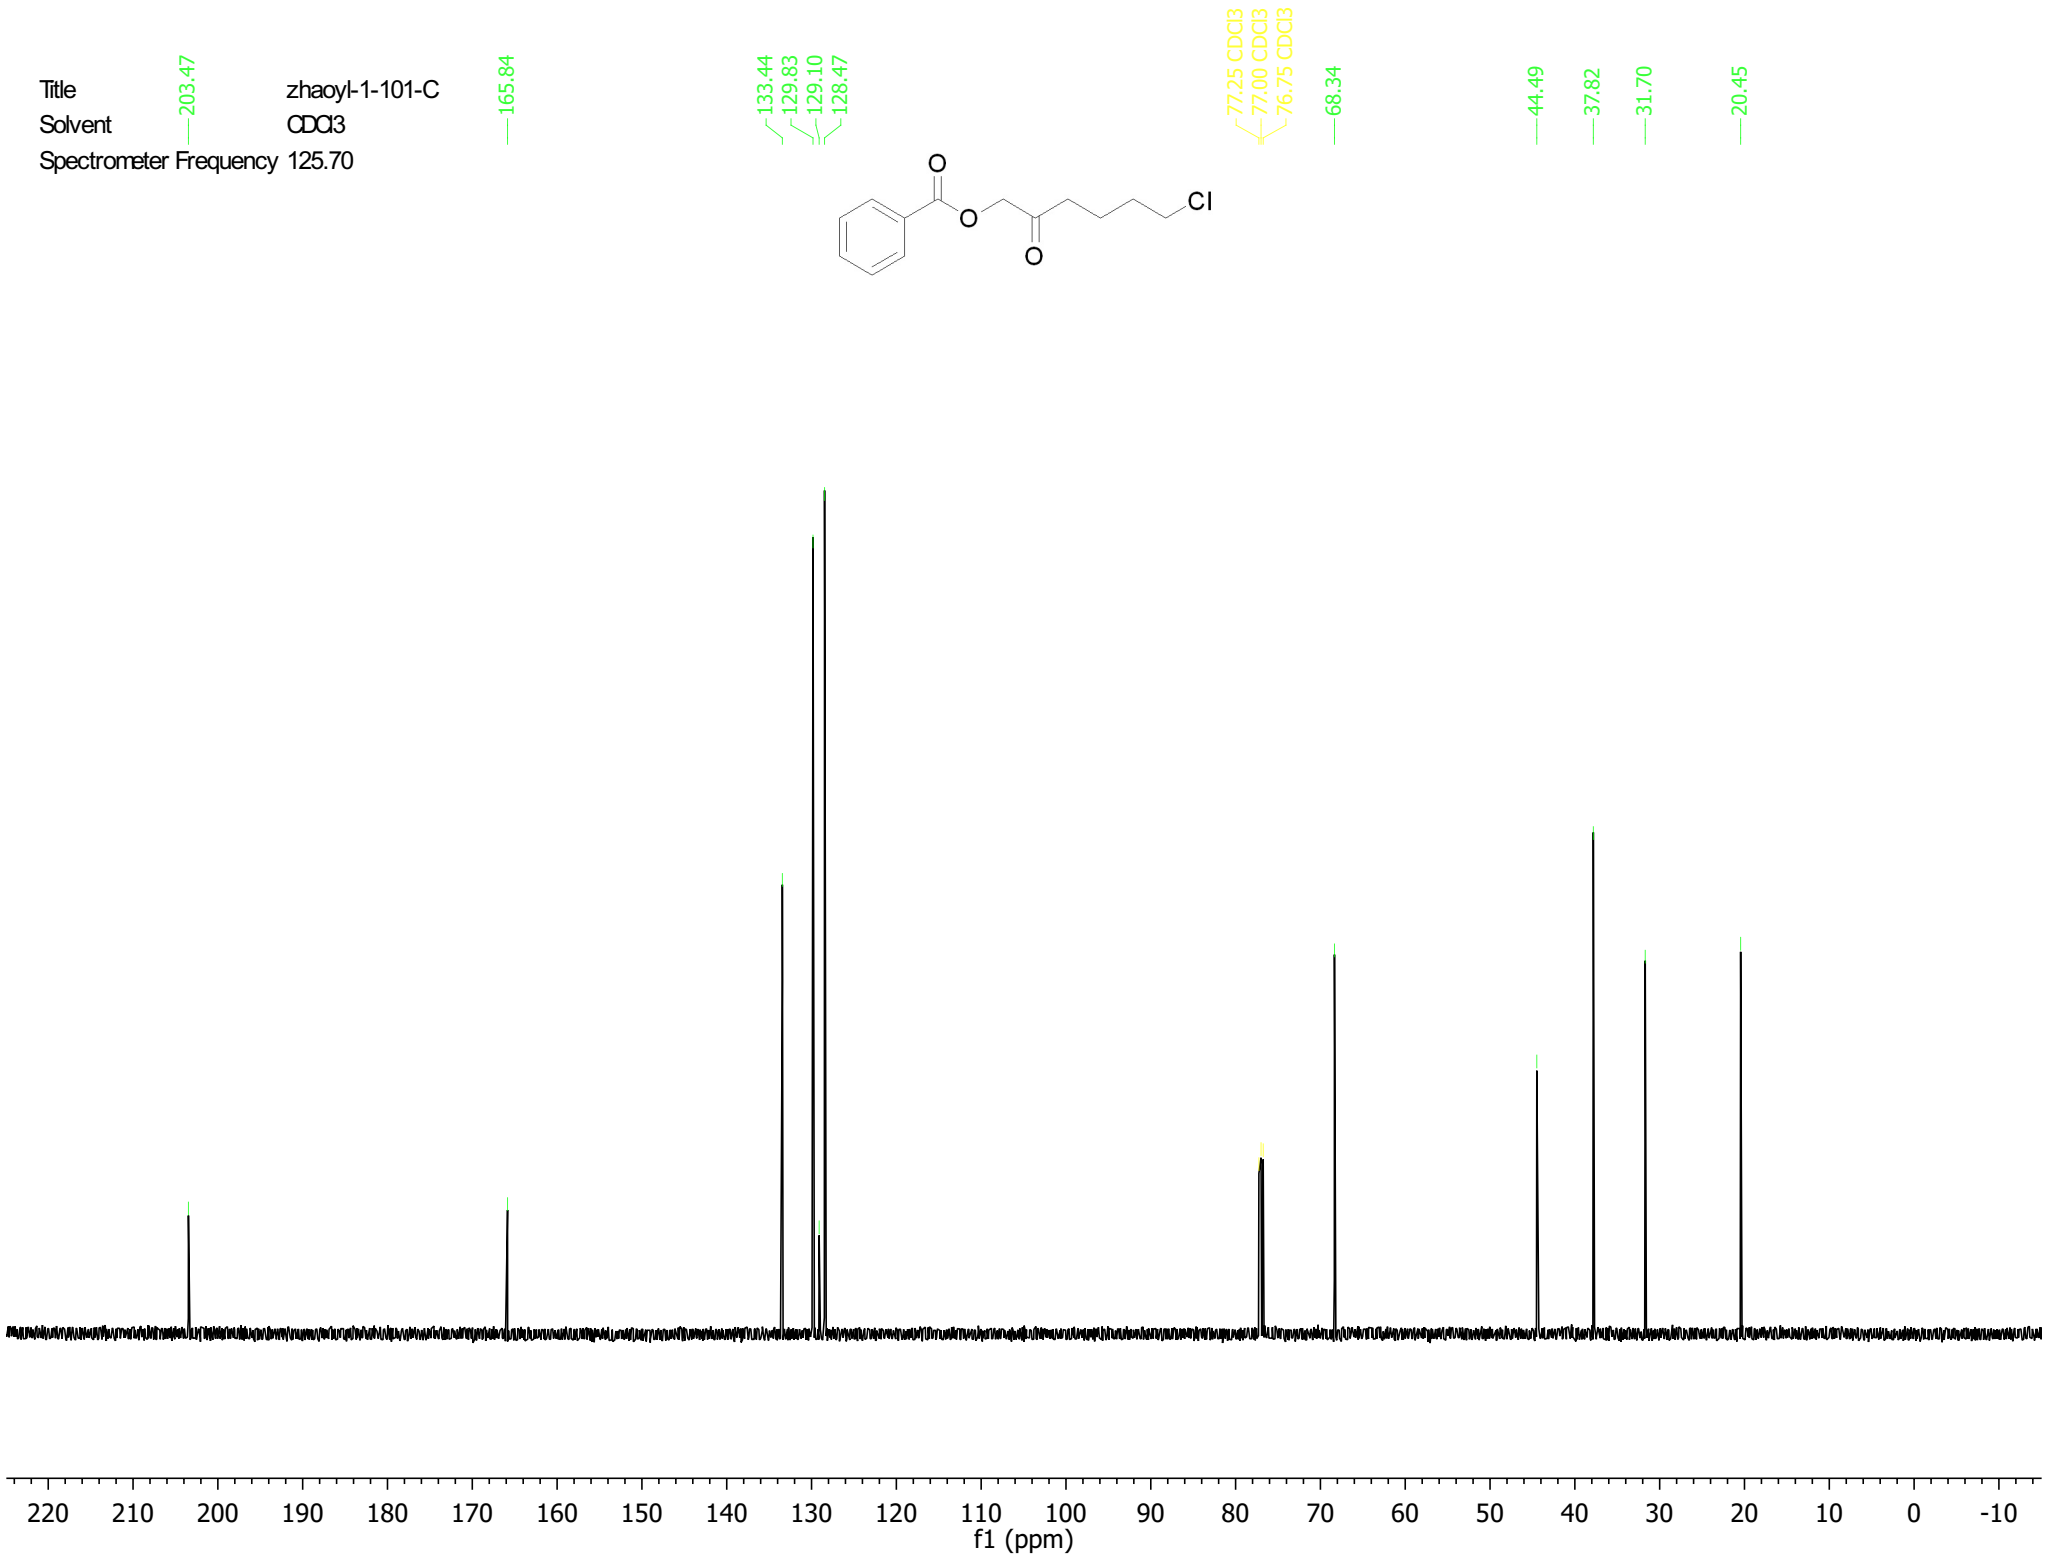

Title zhaoyl-1-102  
Solvent CDCl3  
Spectrometer Frequency 499.86

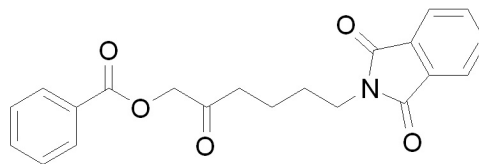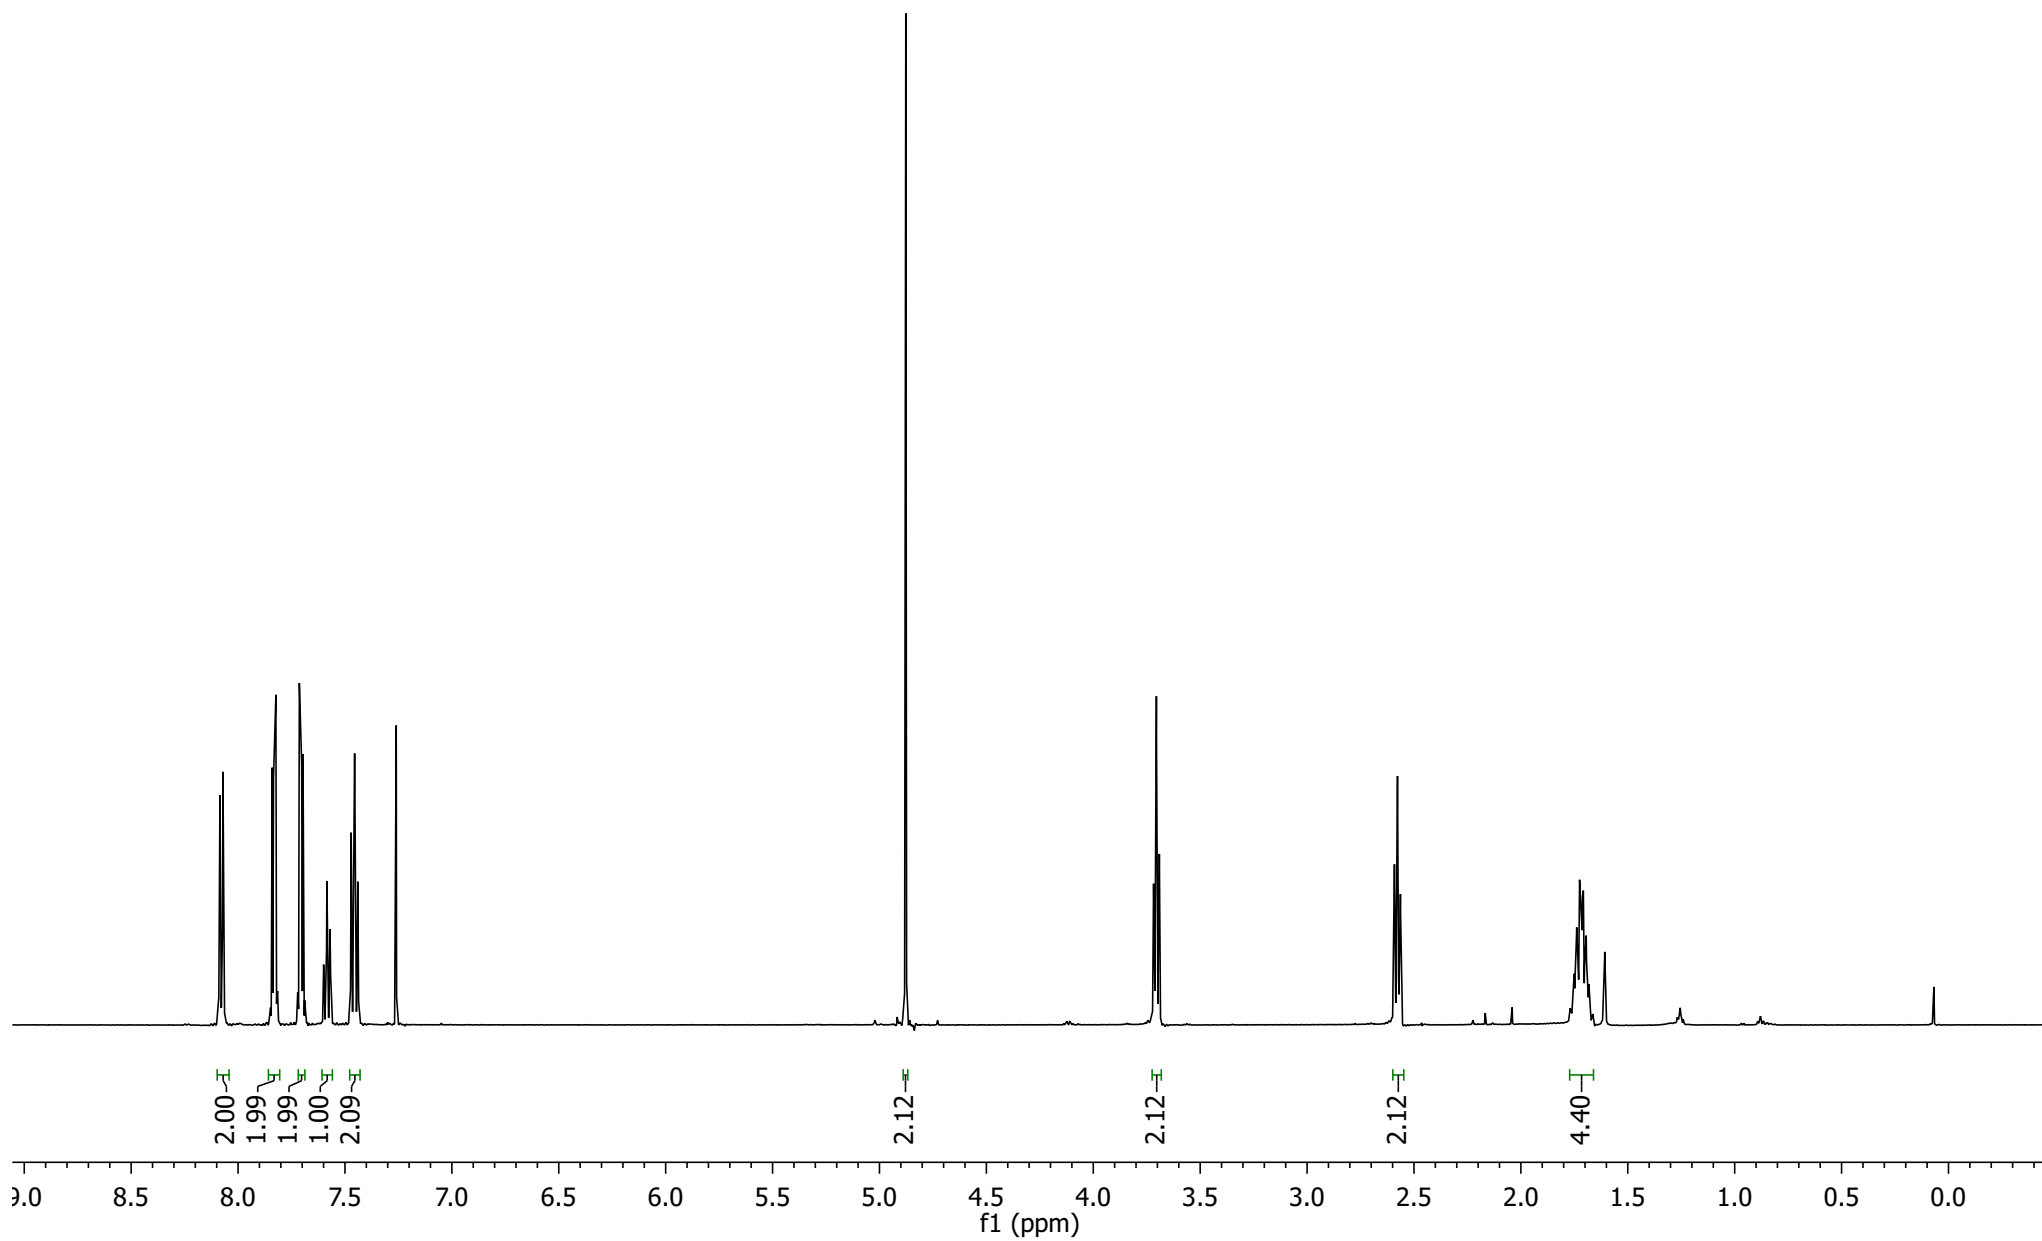



Title zhaoyl-1-102-C  
Solvent CDCl3  
Spectrometer Frequency 125.70

203.47

168.35  
165.83

133.90  
133.39  
132.05  
129.86  
129.18  
128.45  
123.21

77.25 CDCl3  
77.00 CDCl3  
76.75 CDCl3

68.39

38.02  
37.34

27.88

20.23

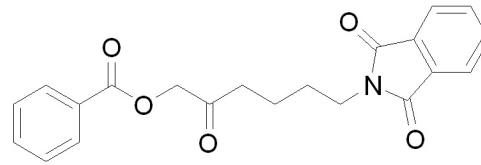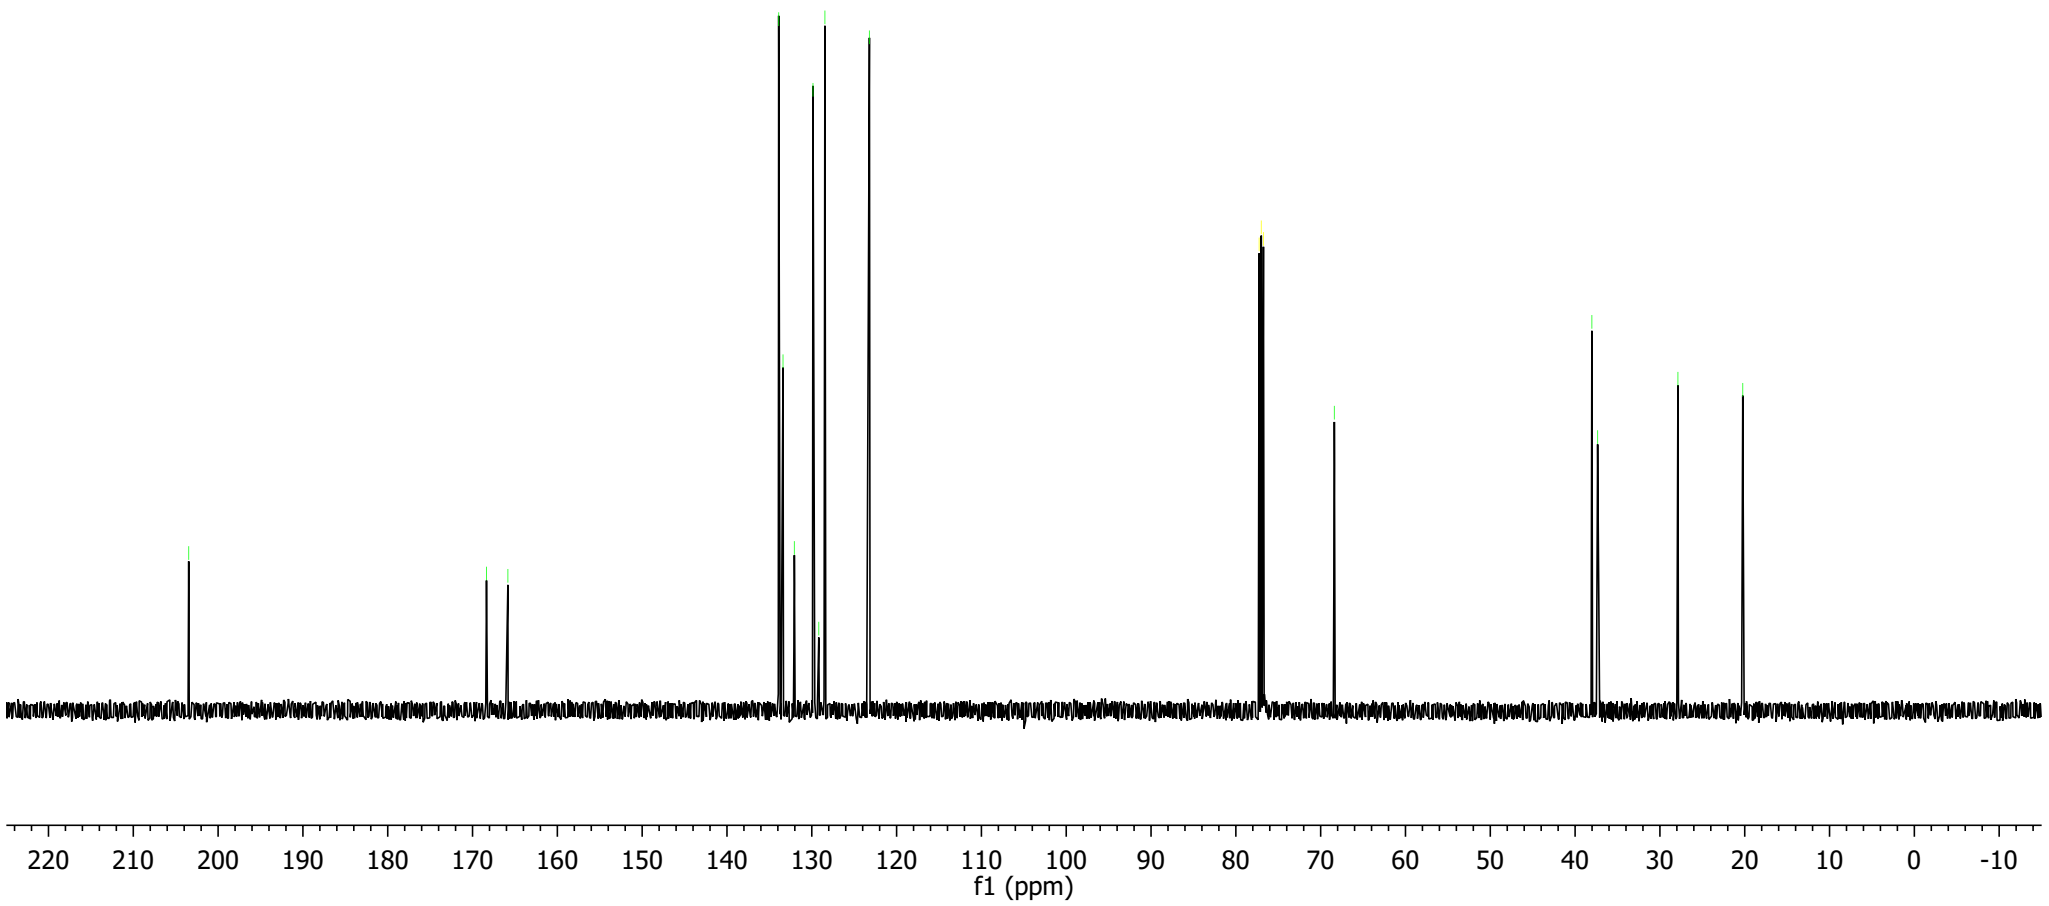

Title zhaoyl-1-108  
Solvent CDCl3  
Spectrometer Frequency 499.86

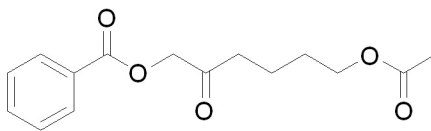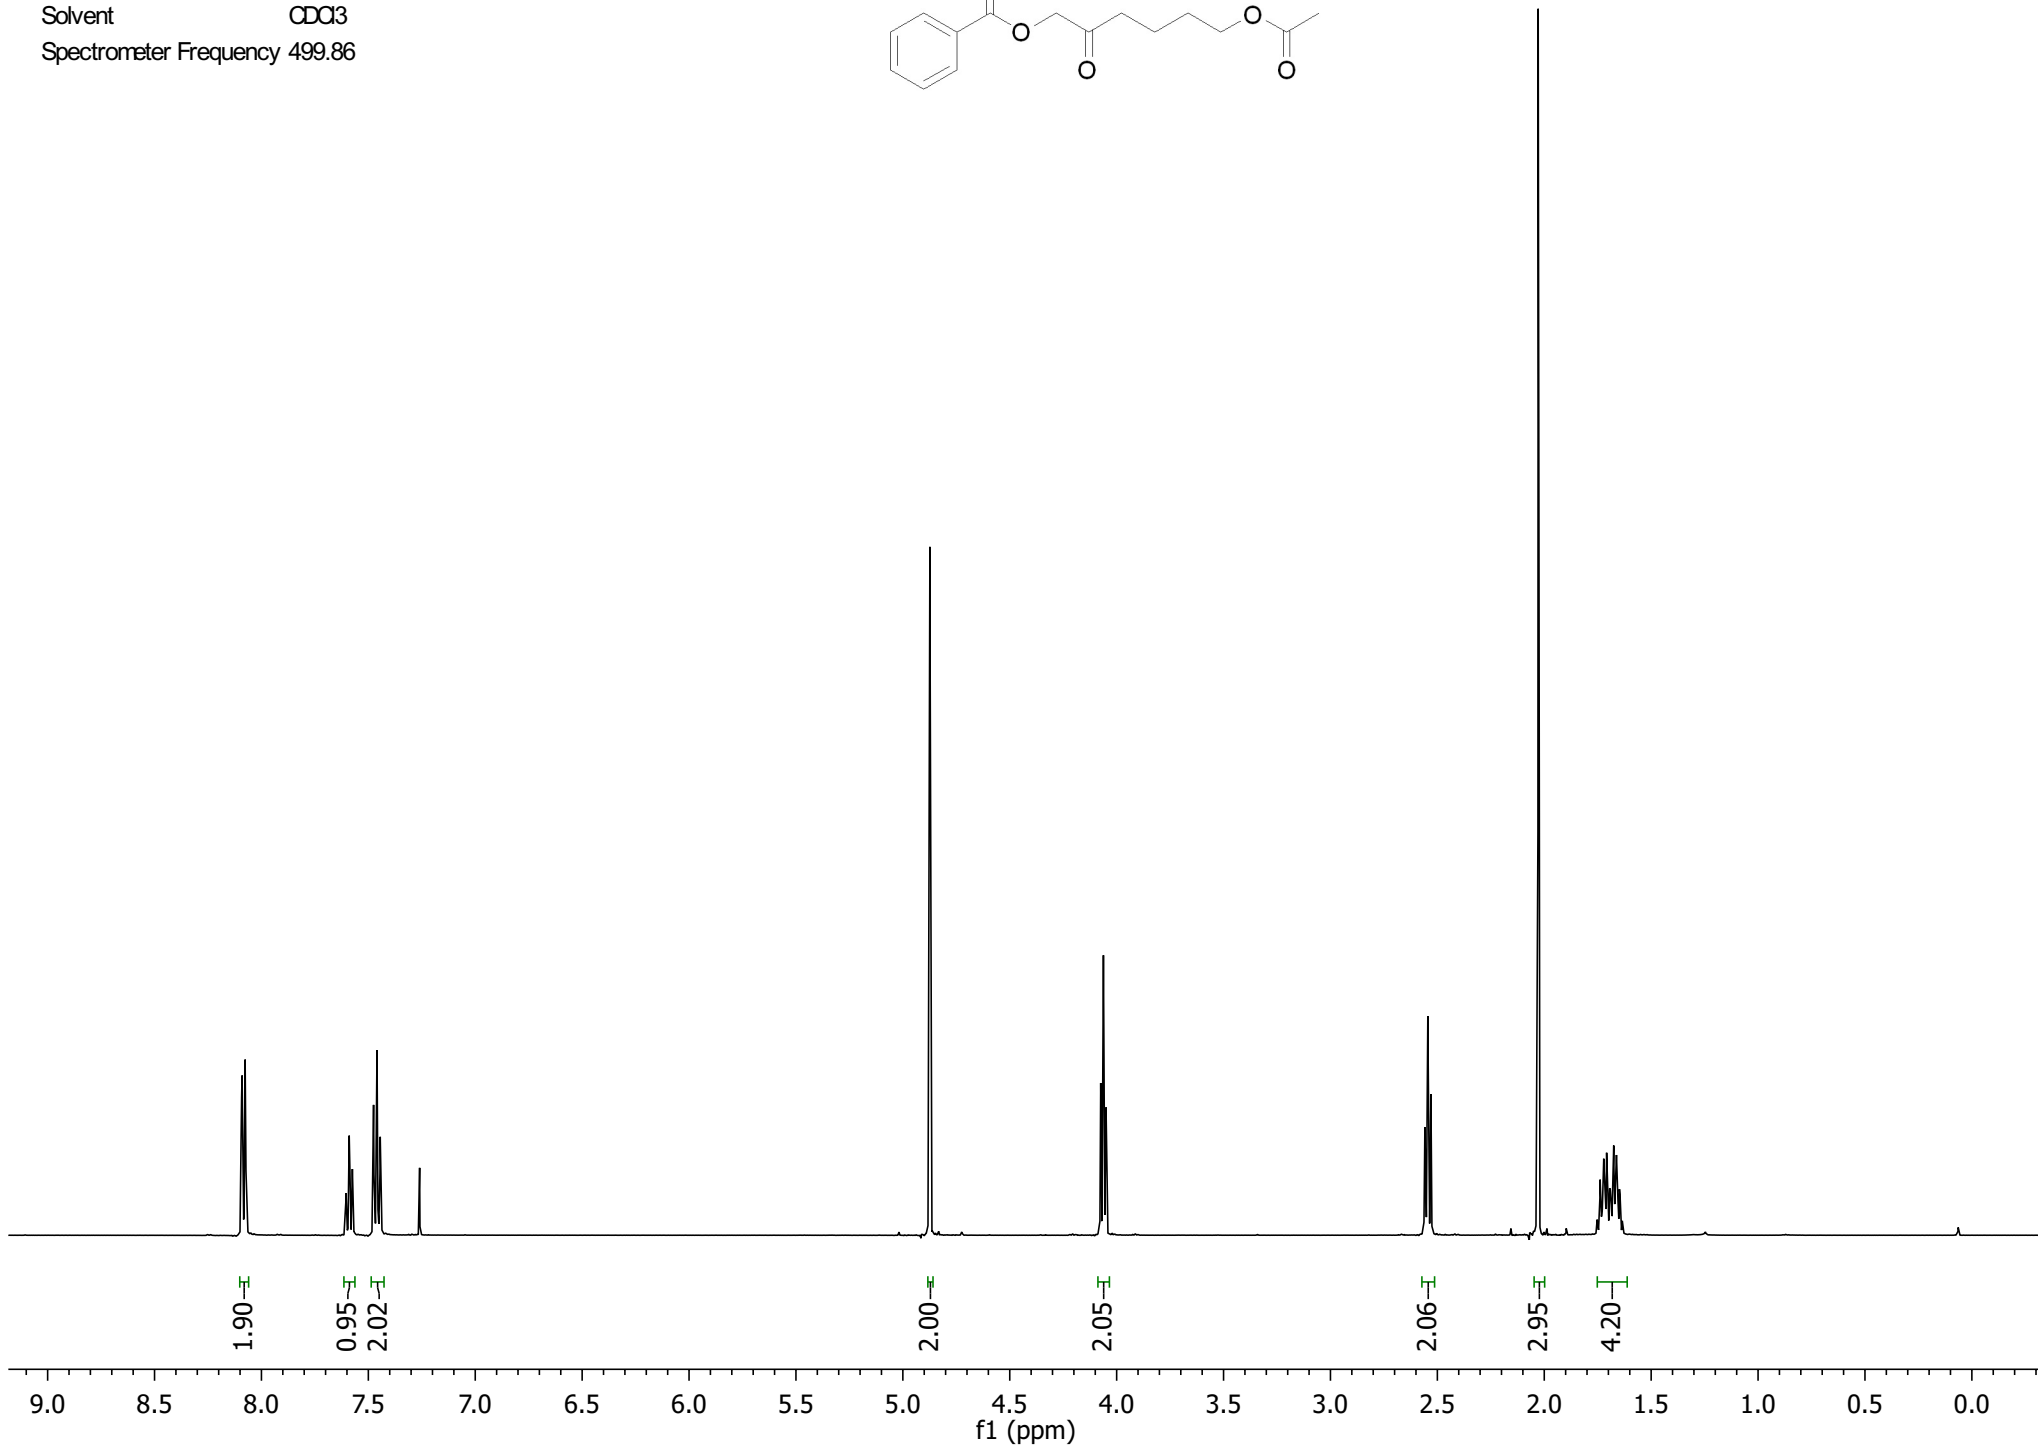

Title zhaoyl-1-108-C  
Solvent CDCl3  
Spectrometer Frequency 125.70

203.58

171.07

165.84

133.43  
129.83  
129.12  
128.46

77.25 CDCl3  
77.00 CDCl3  
76.75 CDCl3

68.36

63.90

38.15

27.93

20.90

19.62

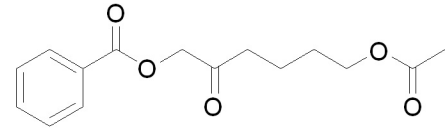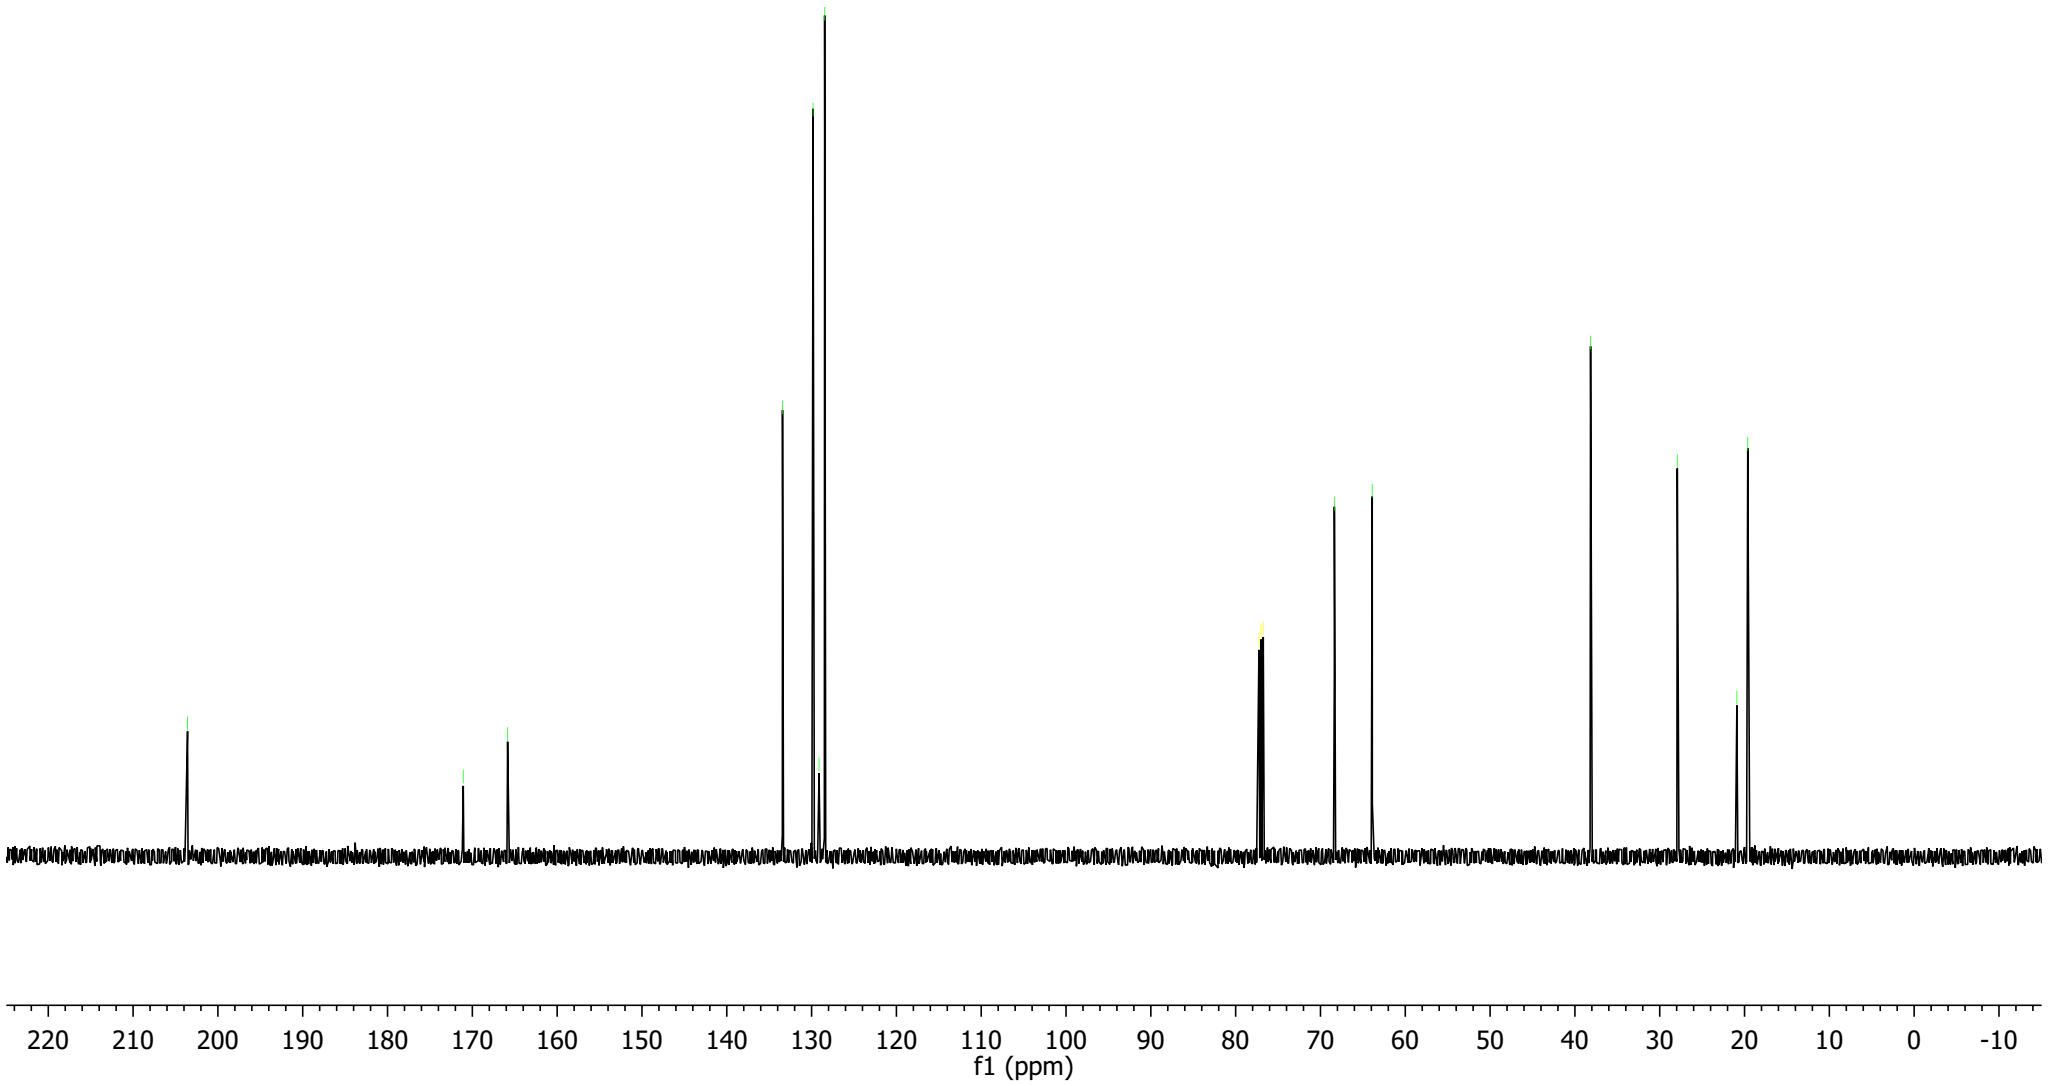

Title zhaoyl-1-105  
Solvent CDCl3  
Spectrometer Frequency 499.86

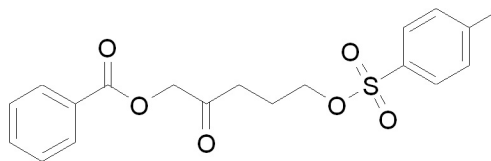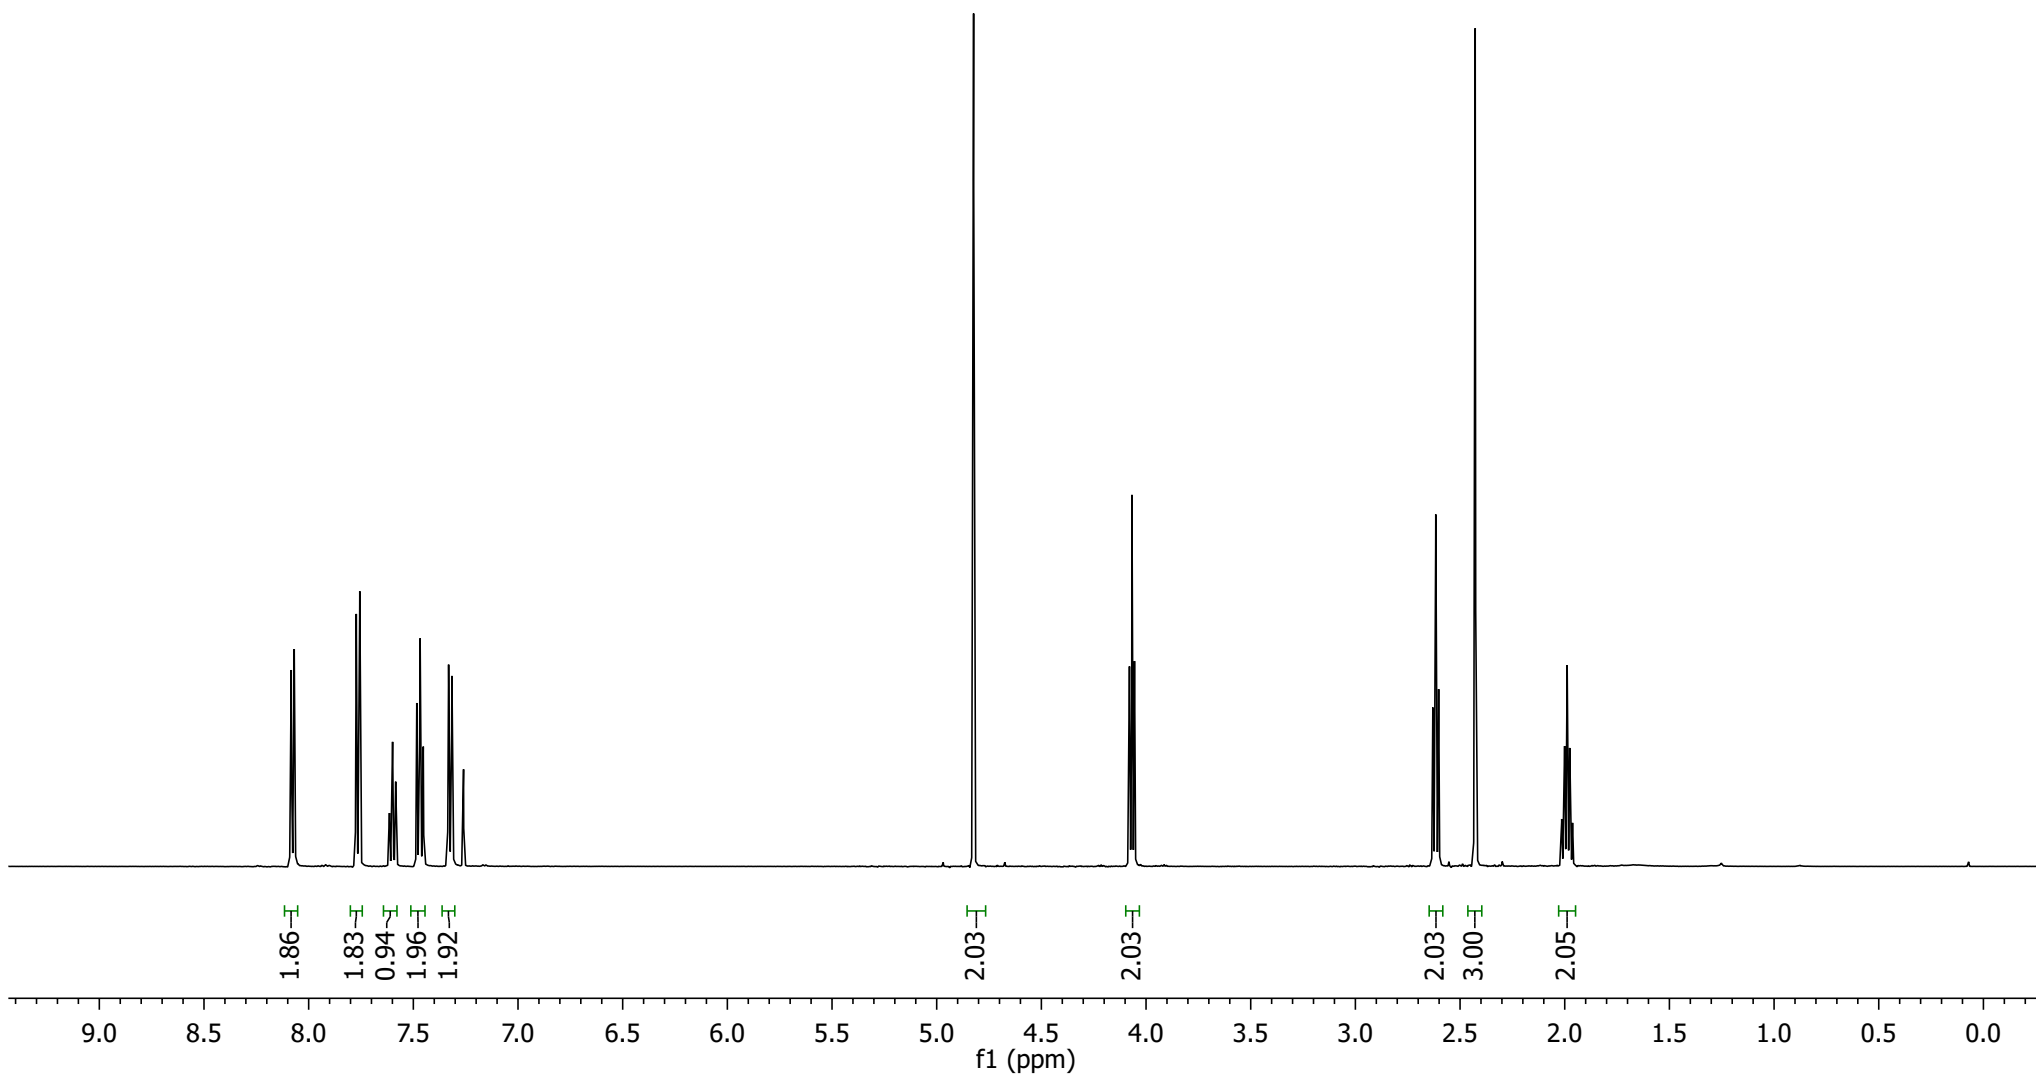

Title zhaoyl-1-105-C  
Solvent CDCl3  
Spectrometer Frequency 125.70

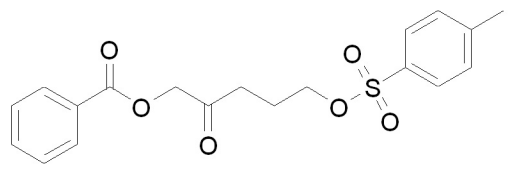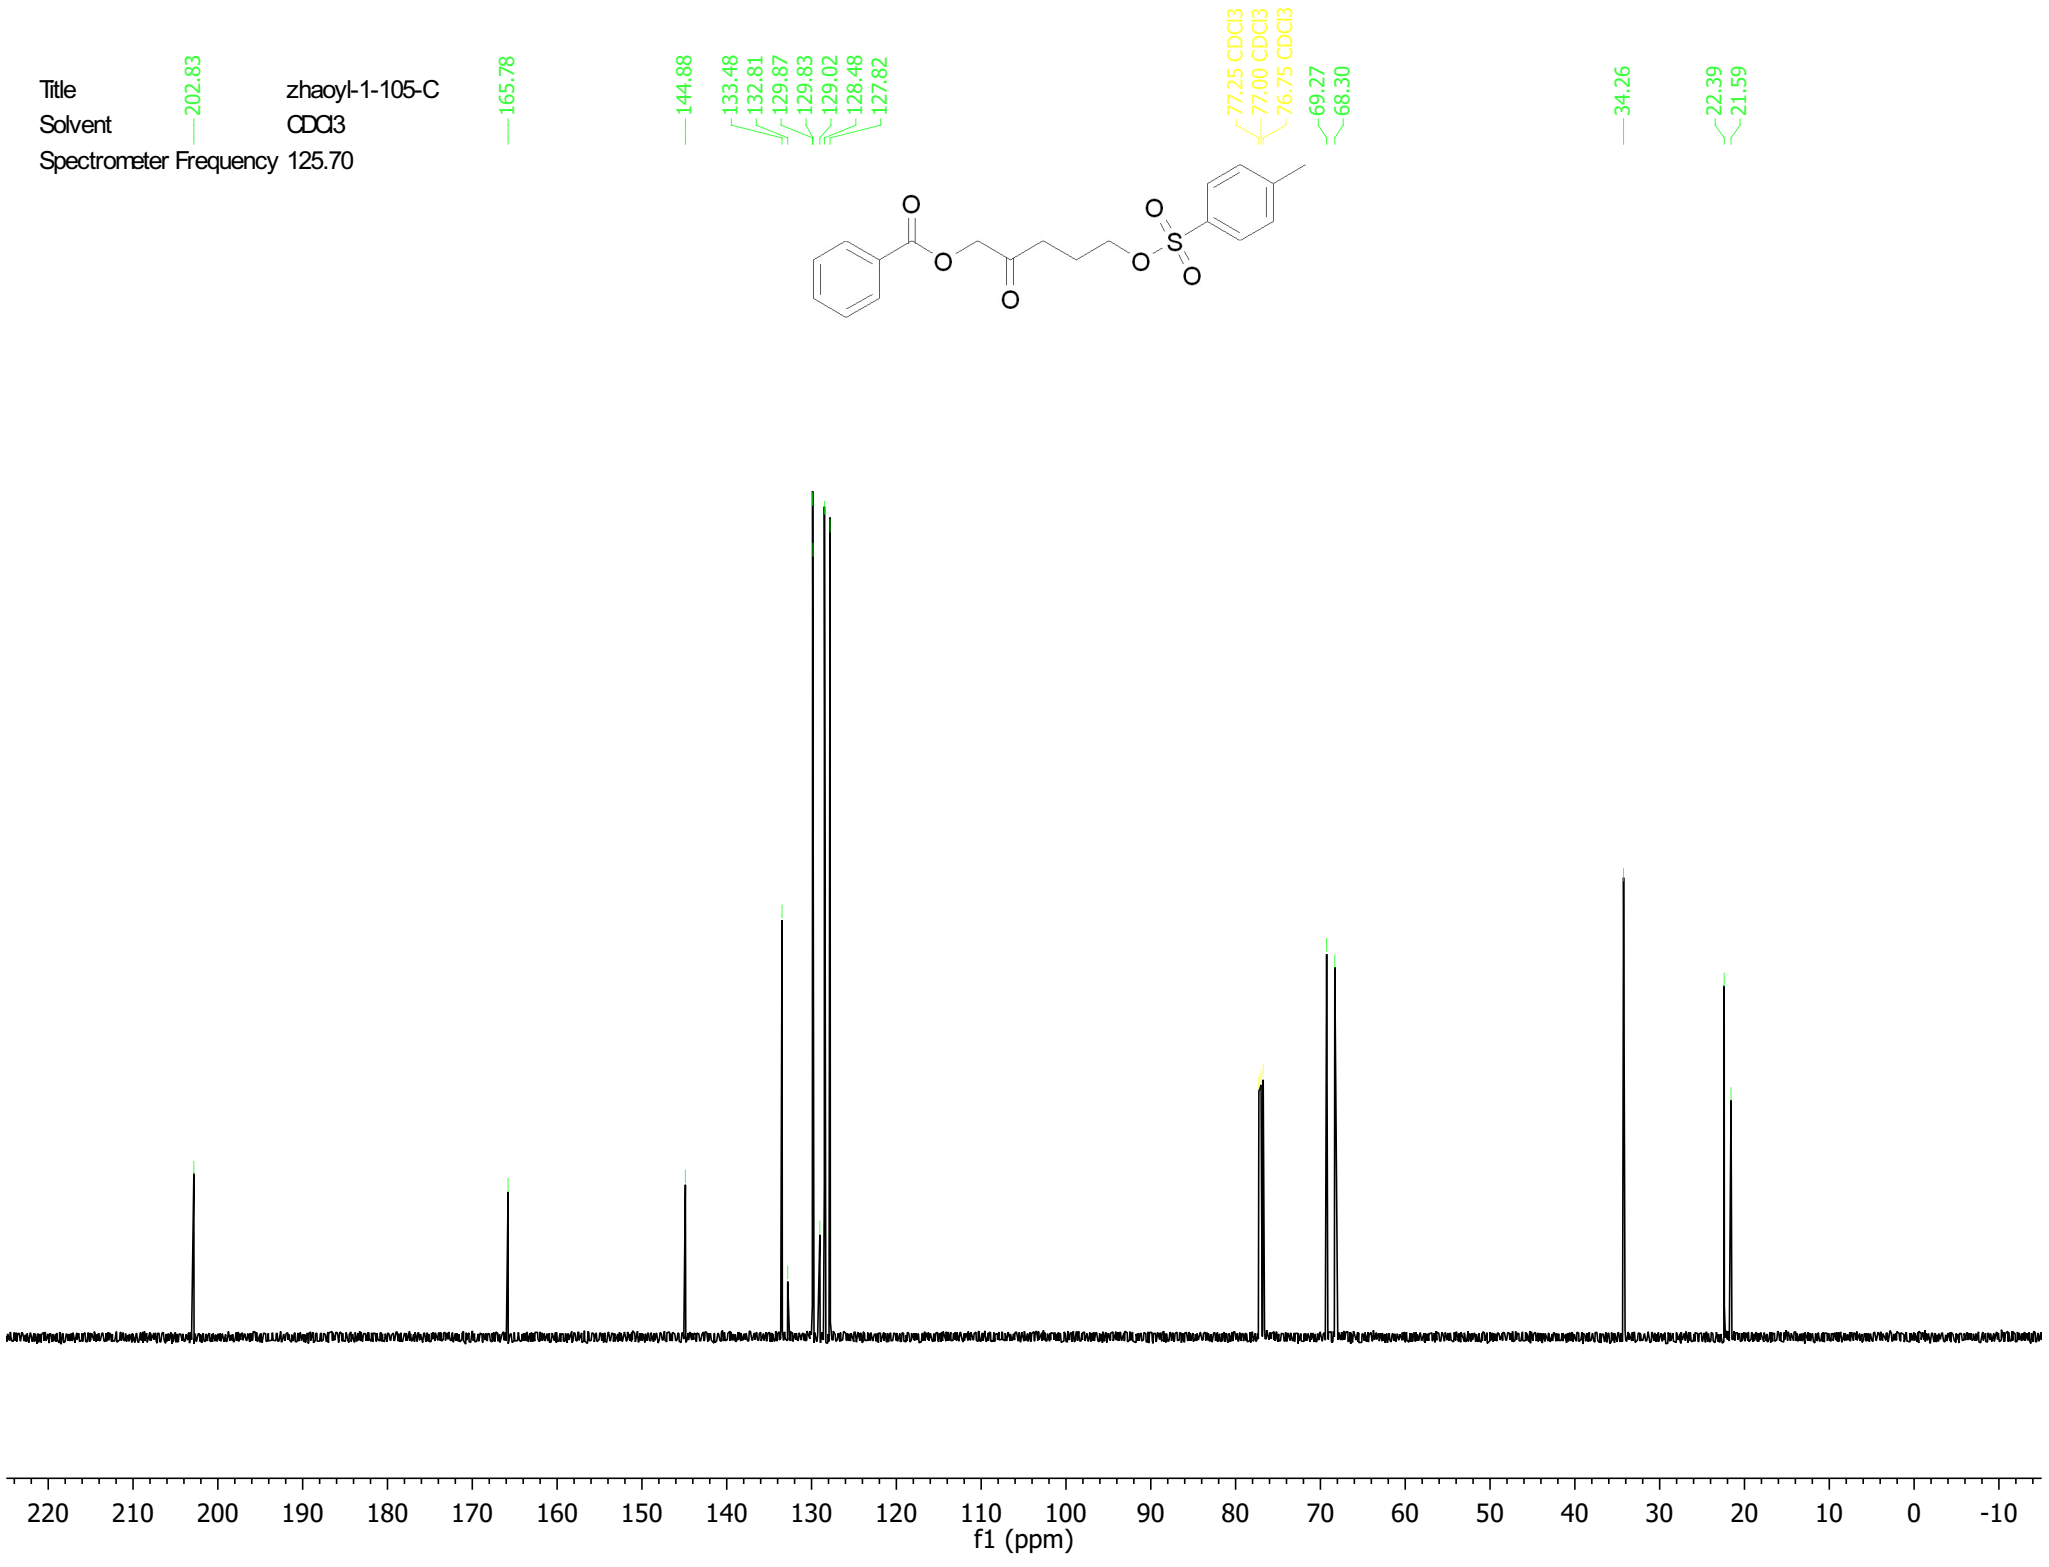

Title zhaoyl-1-103-3  
Solvent CDCl3  
Spectrometer Frequency 499.86

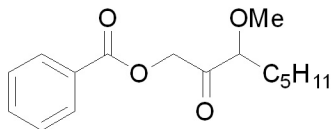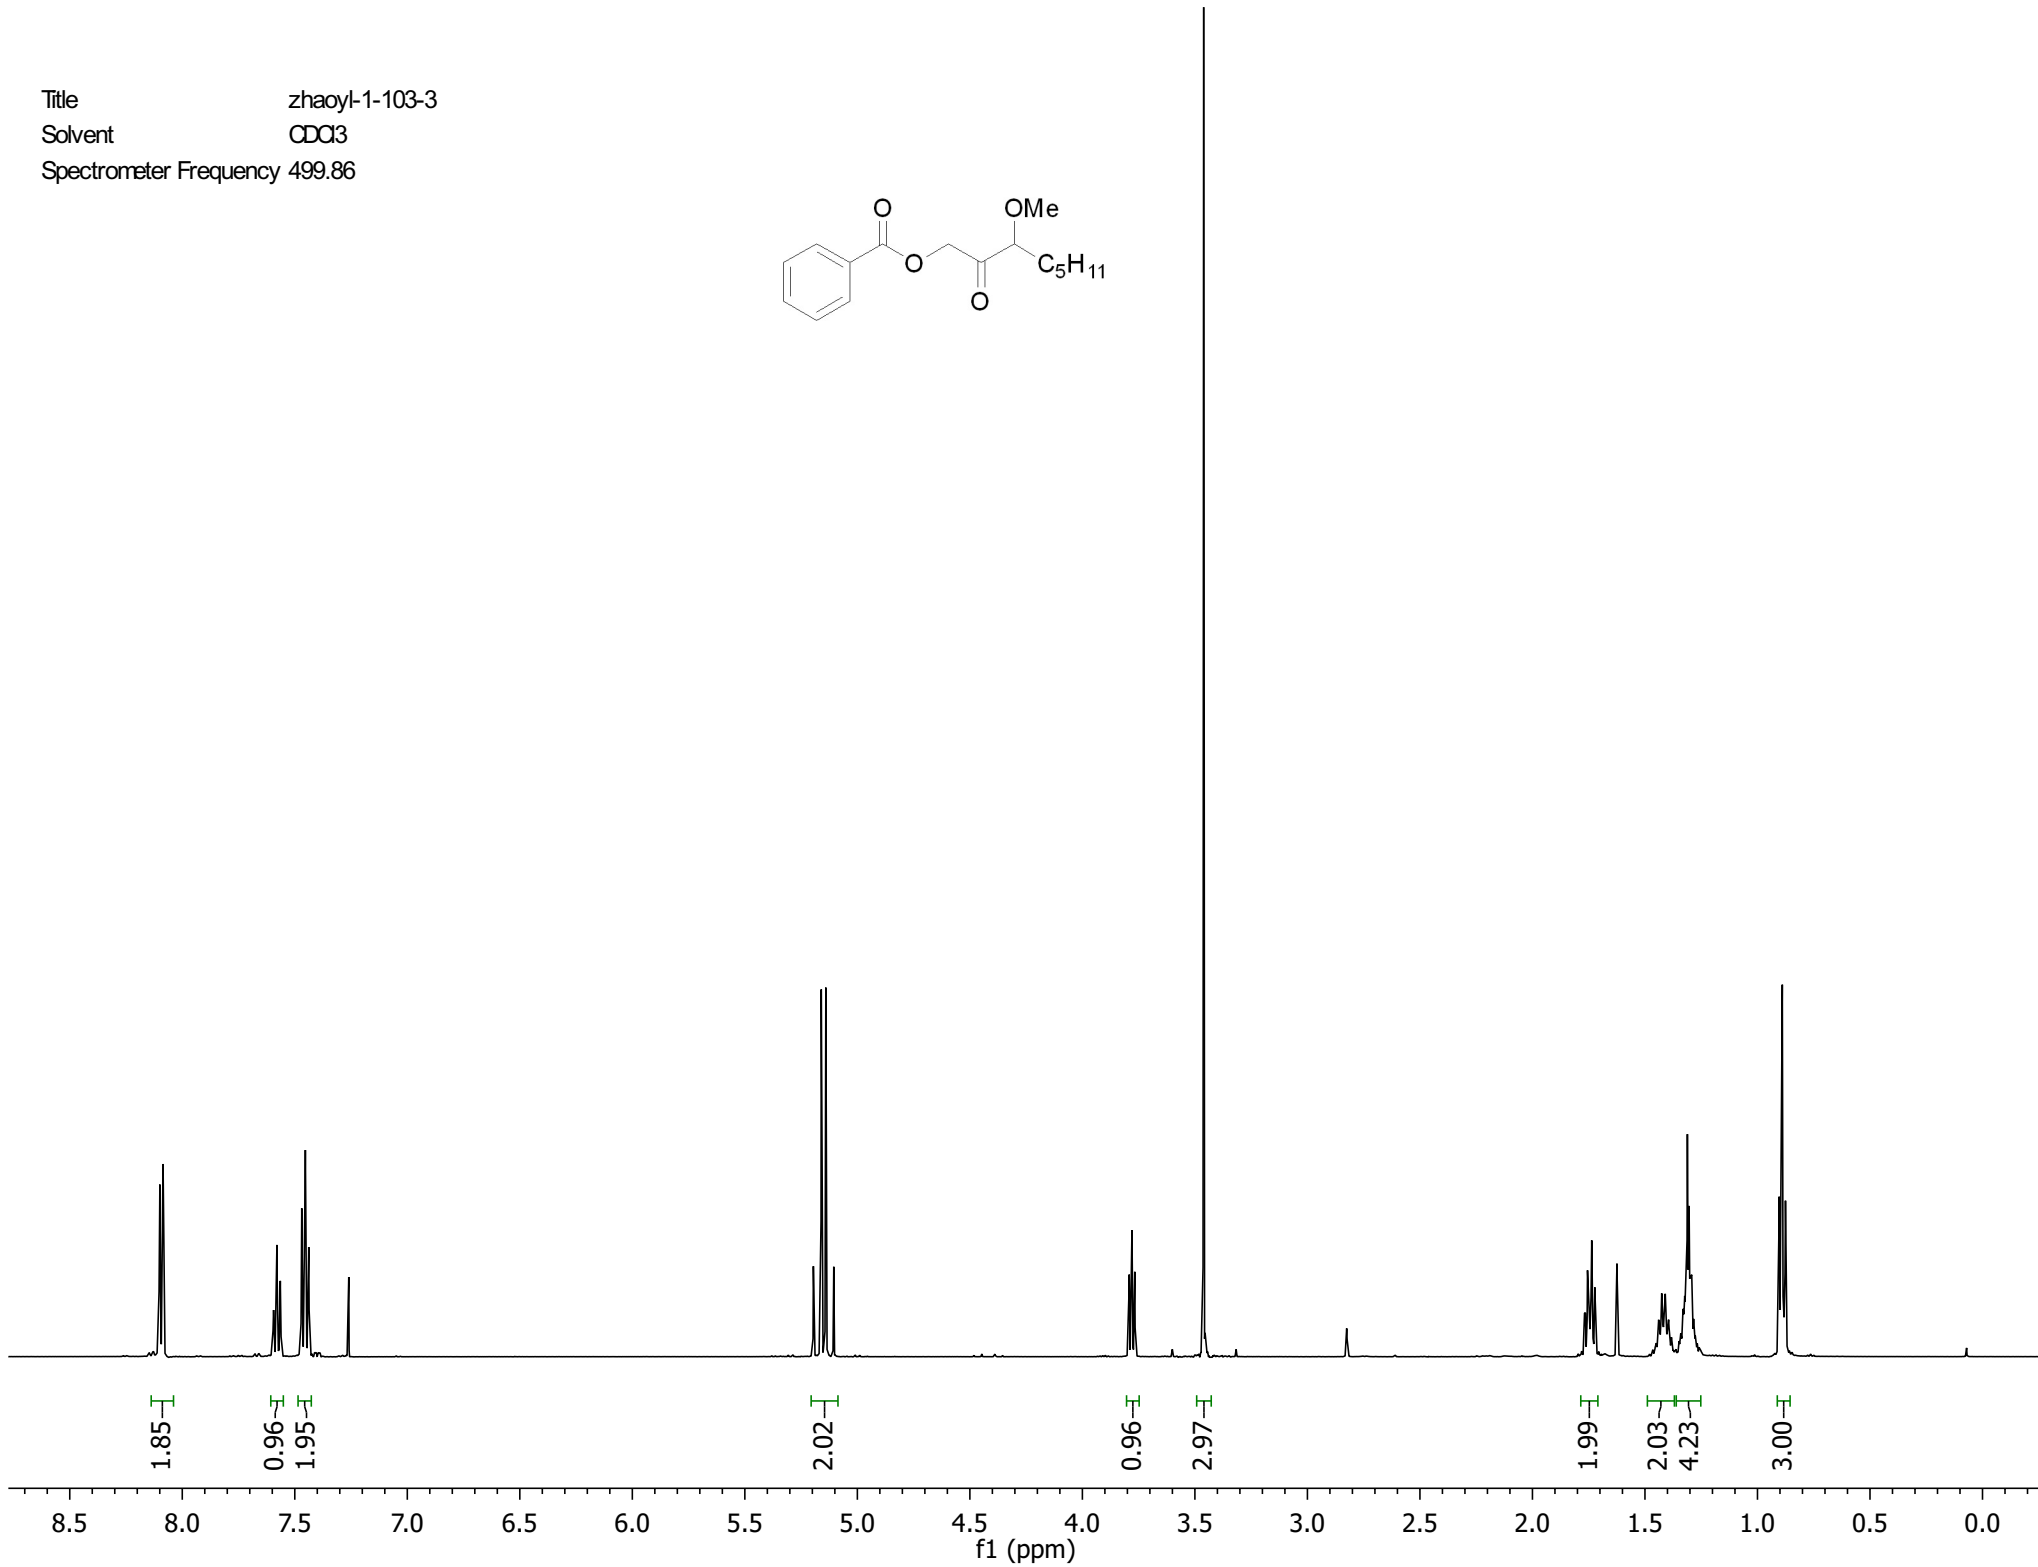

Title zhaoyl-1-103-3-C  
Solvent CDCl3  
Spectrometer Frequency 125.70

205.41

165.92

133.27

129.85

129.35

128.39

86.22

66.67

58.51

31.82

31.56

24.43

22.42

13.96

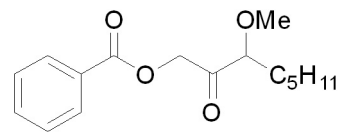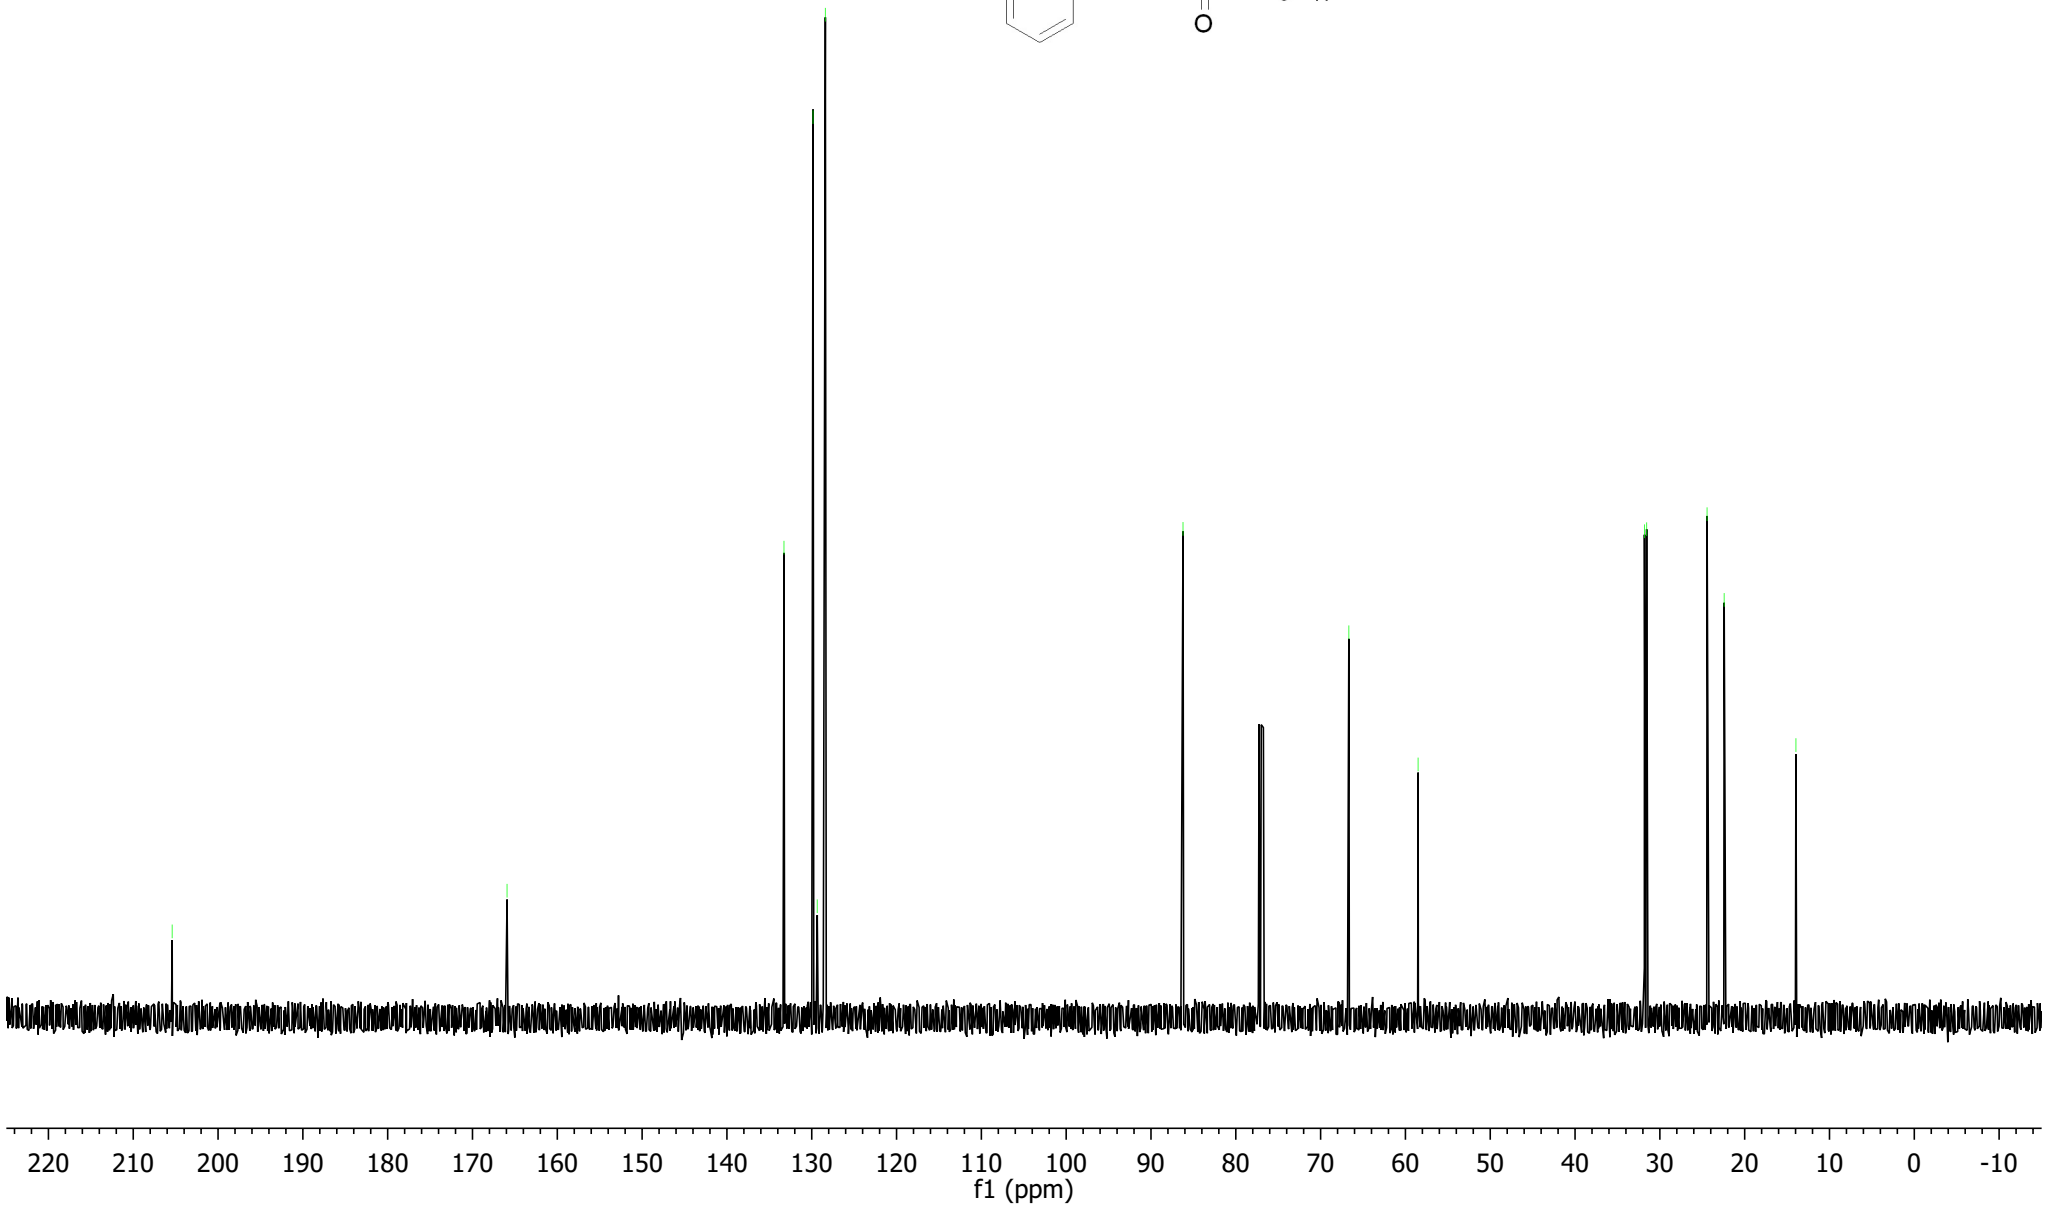

Title jkg-V-35-H  
Solvent CDCl3  
Spectrometer Frequency 499.86

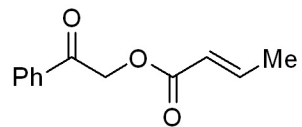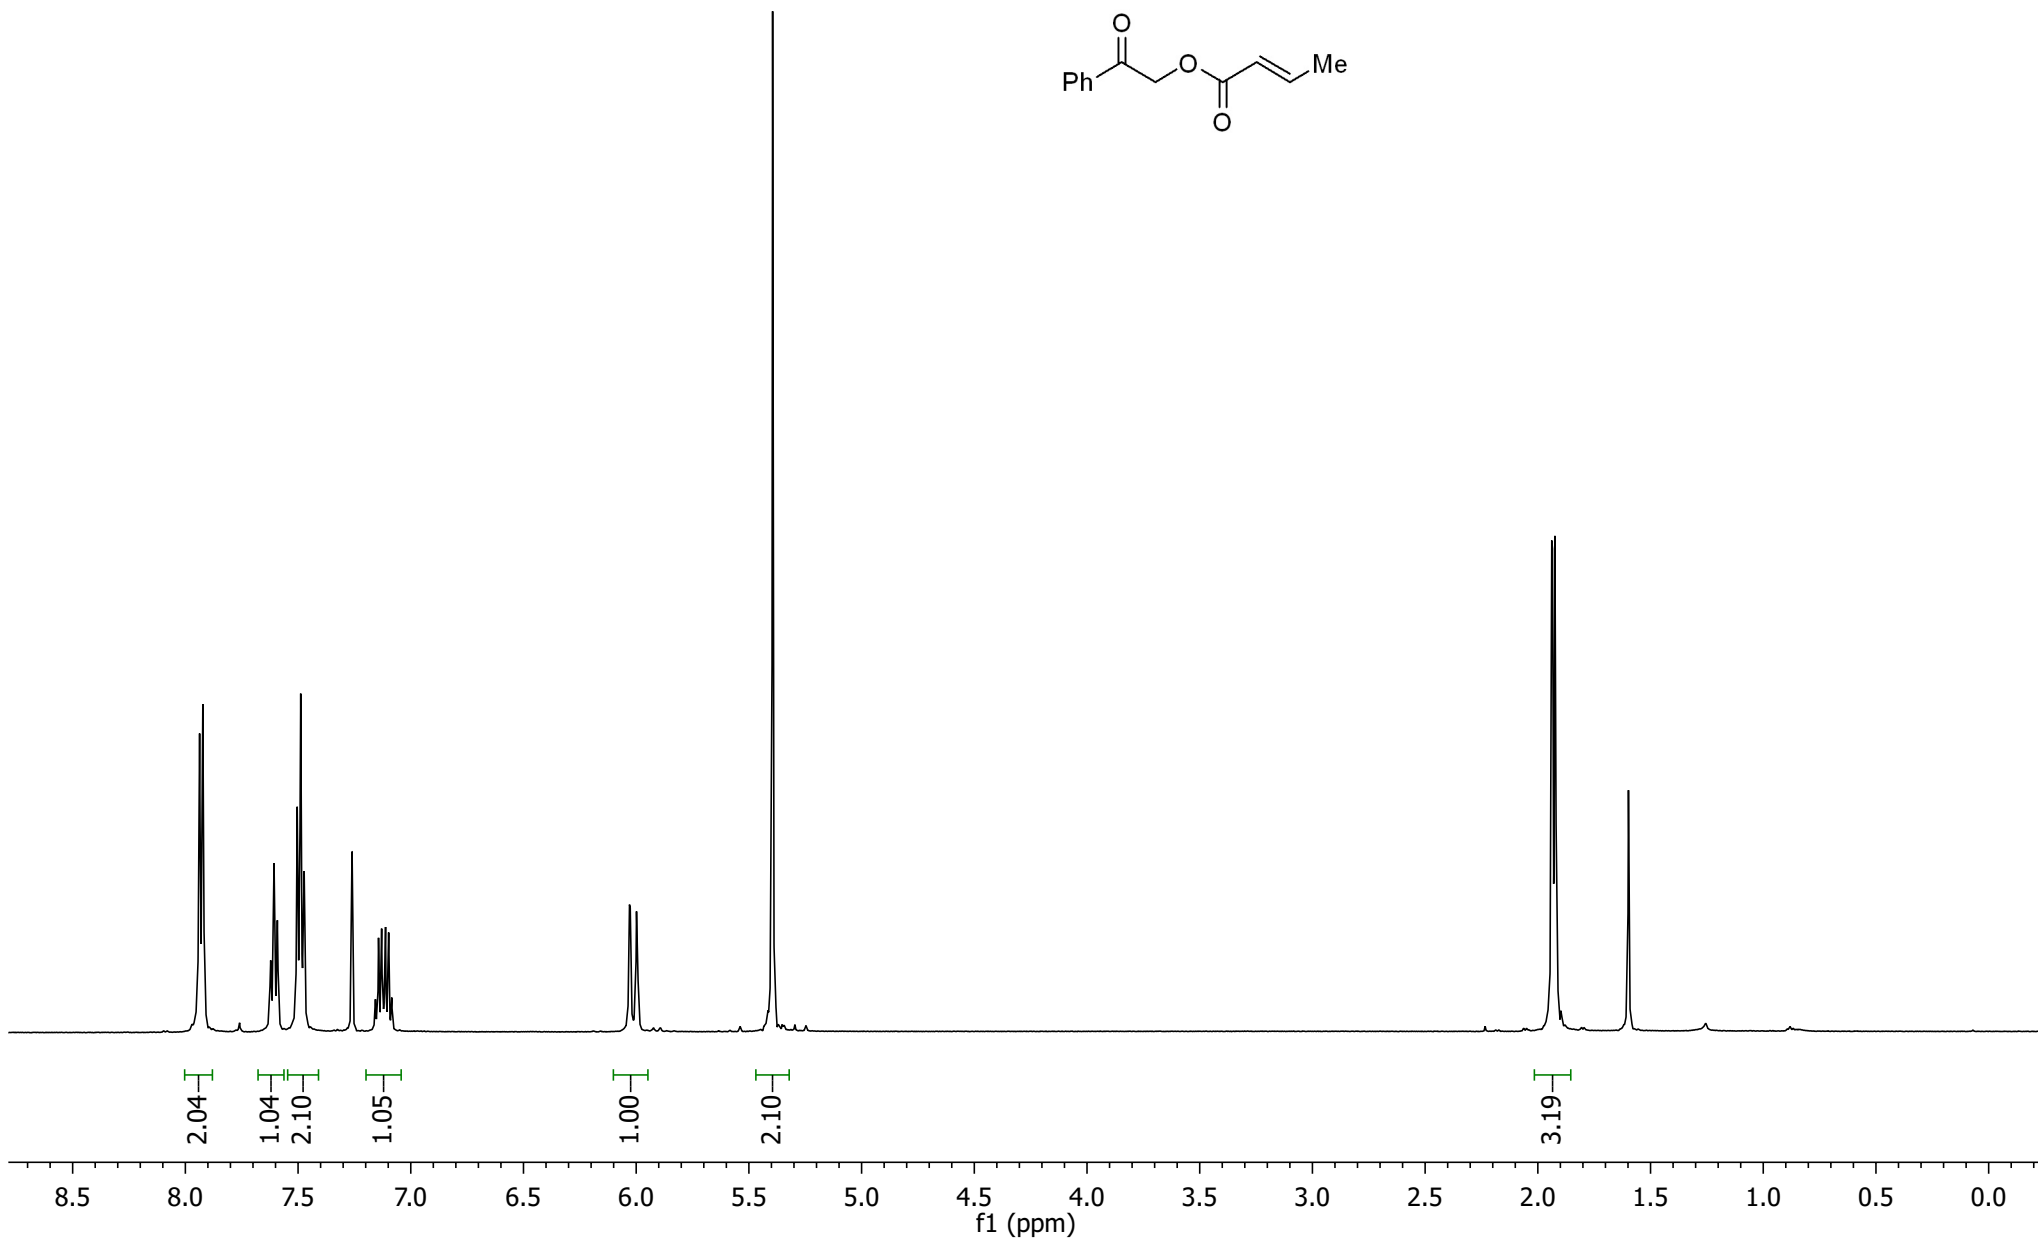



Title kg-V-35-C  
Solvent CDCl3  
Spectrometer Frequency 125.70

192.33

165.72

146.38

134.30

133.80

128.82

127.78

121.69

77.25 CDCl3

77.00 CDCl3

76.75 CDCl3

65.81

18.13

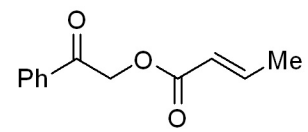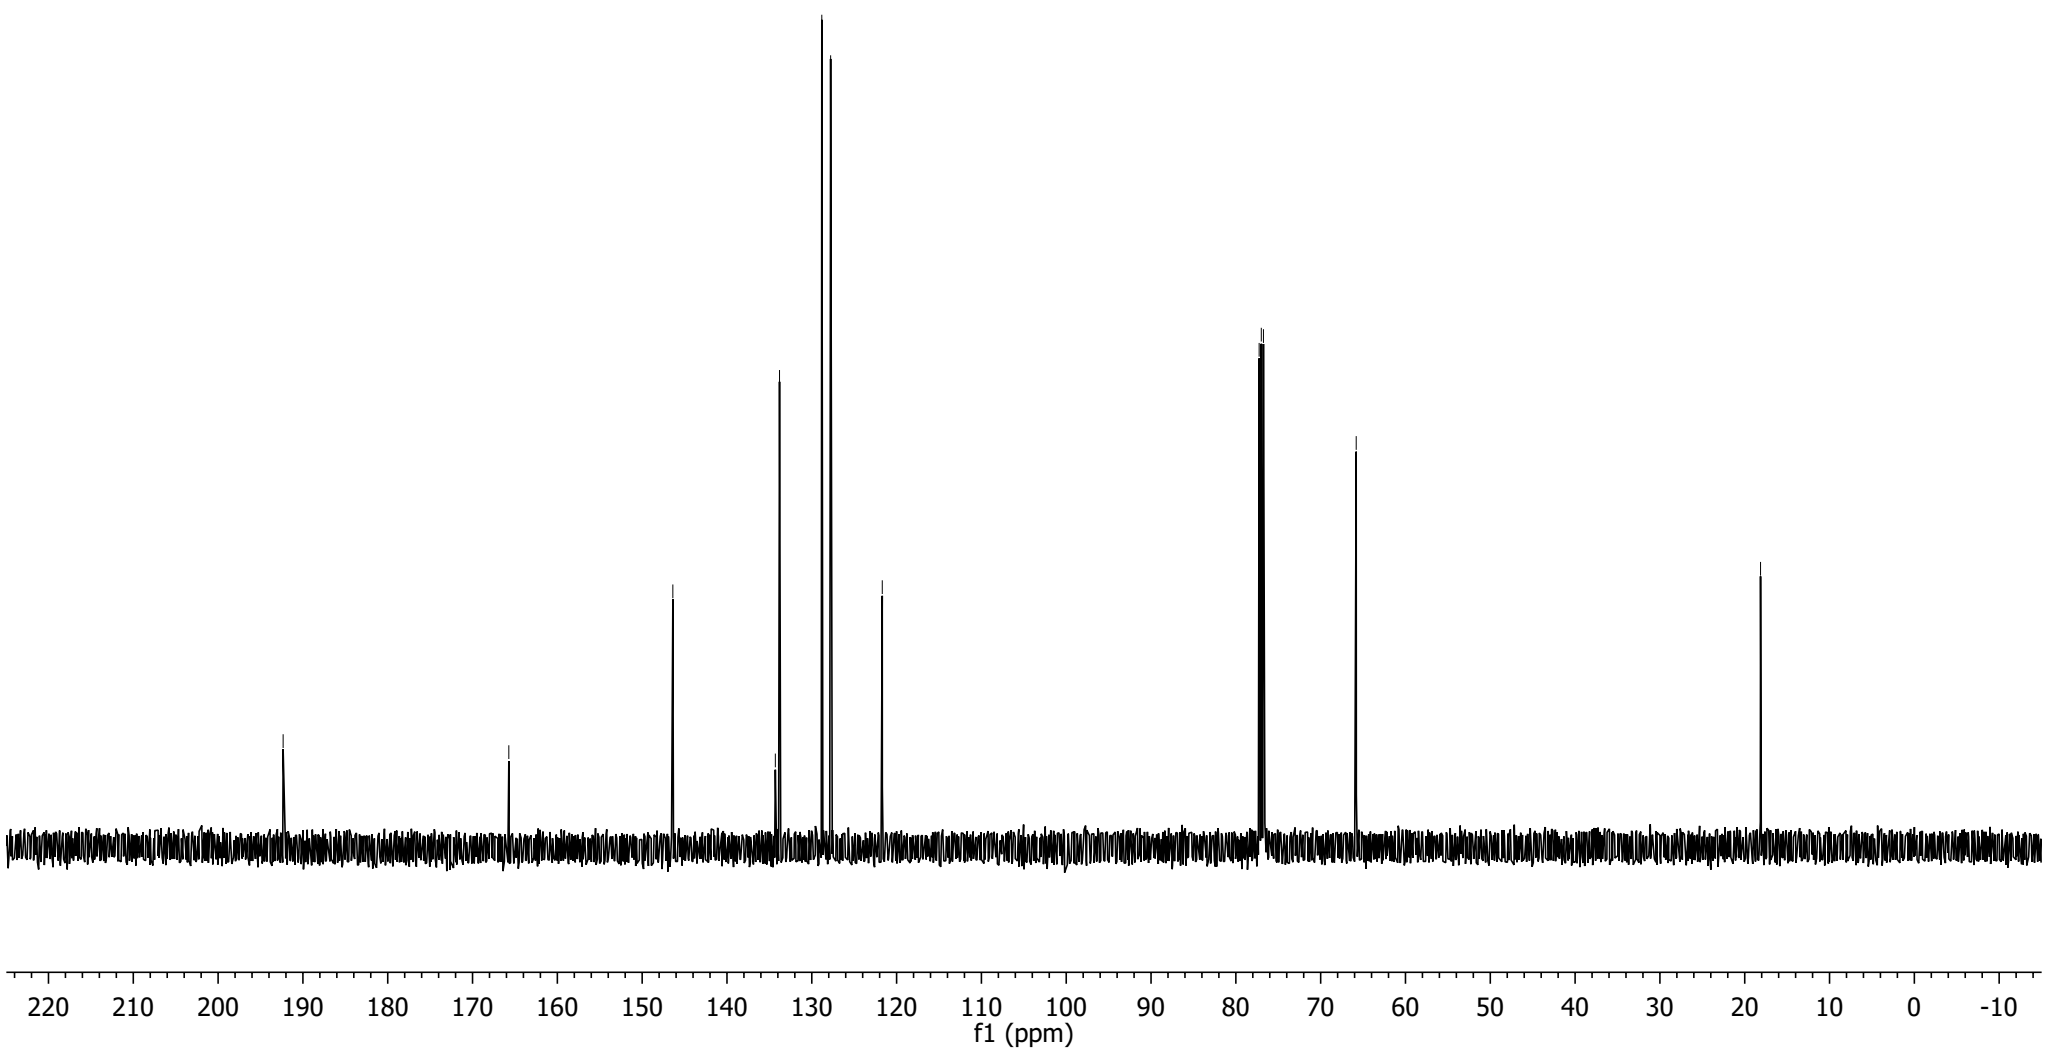

Title jkg-V-33A-P-H  
Solvent CDCl3  
Spectrometer Frequency 499.86

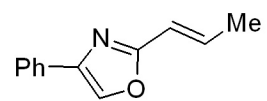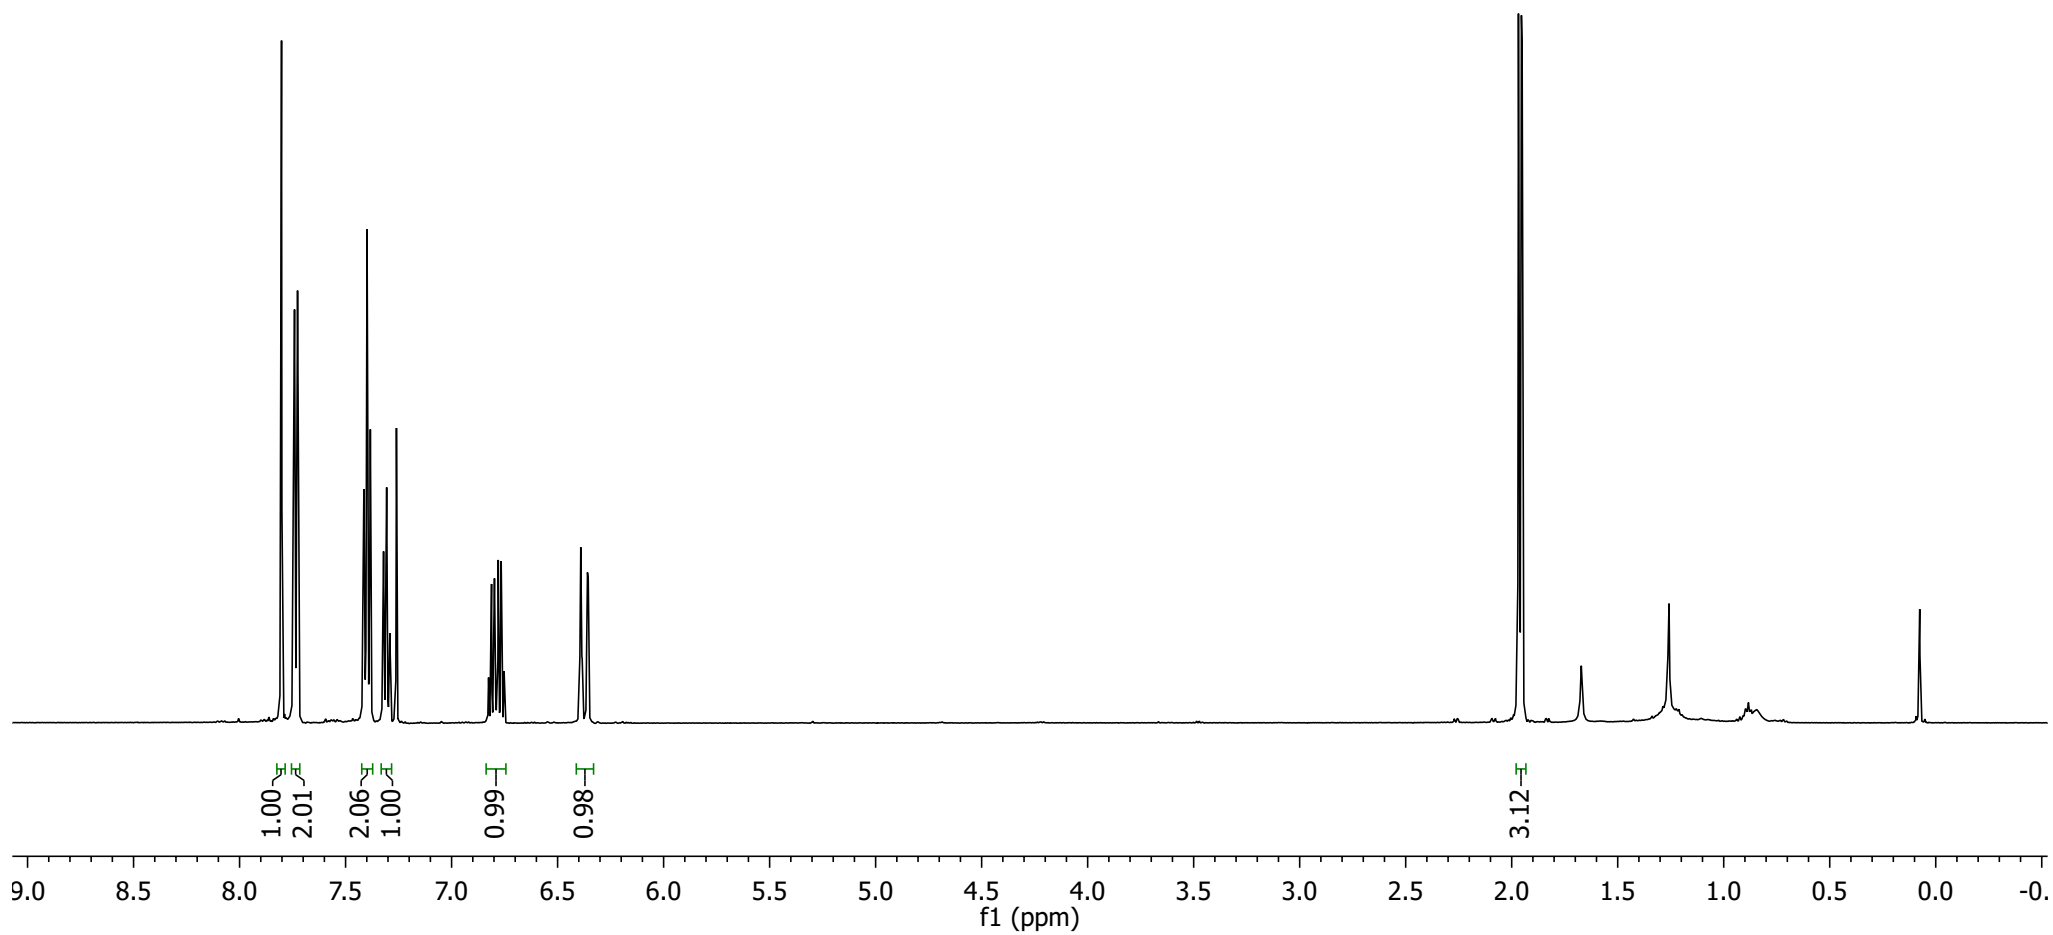

Title jkg-V-33b-C  
Solvent cdc13  
Spectrometer Frequency 150.79

161.46

141.36

135.51

132.55

131.12

128.67

127.95

125.46

117.87

77.21 cdc13

77.00 cdc13

76.79 cdc13

18.46

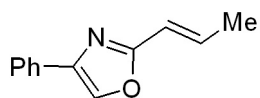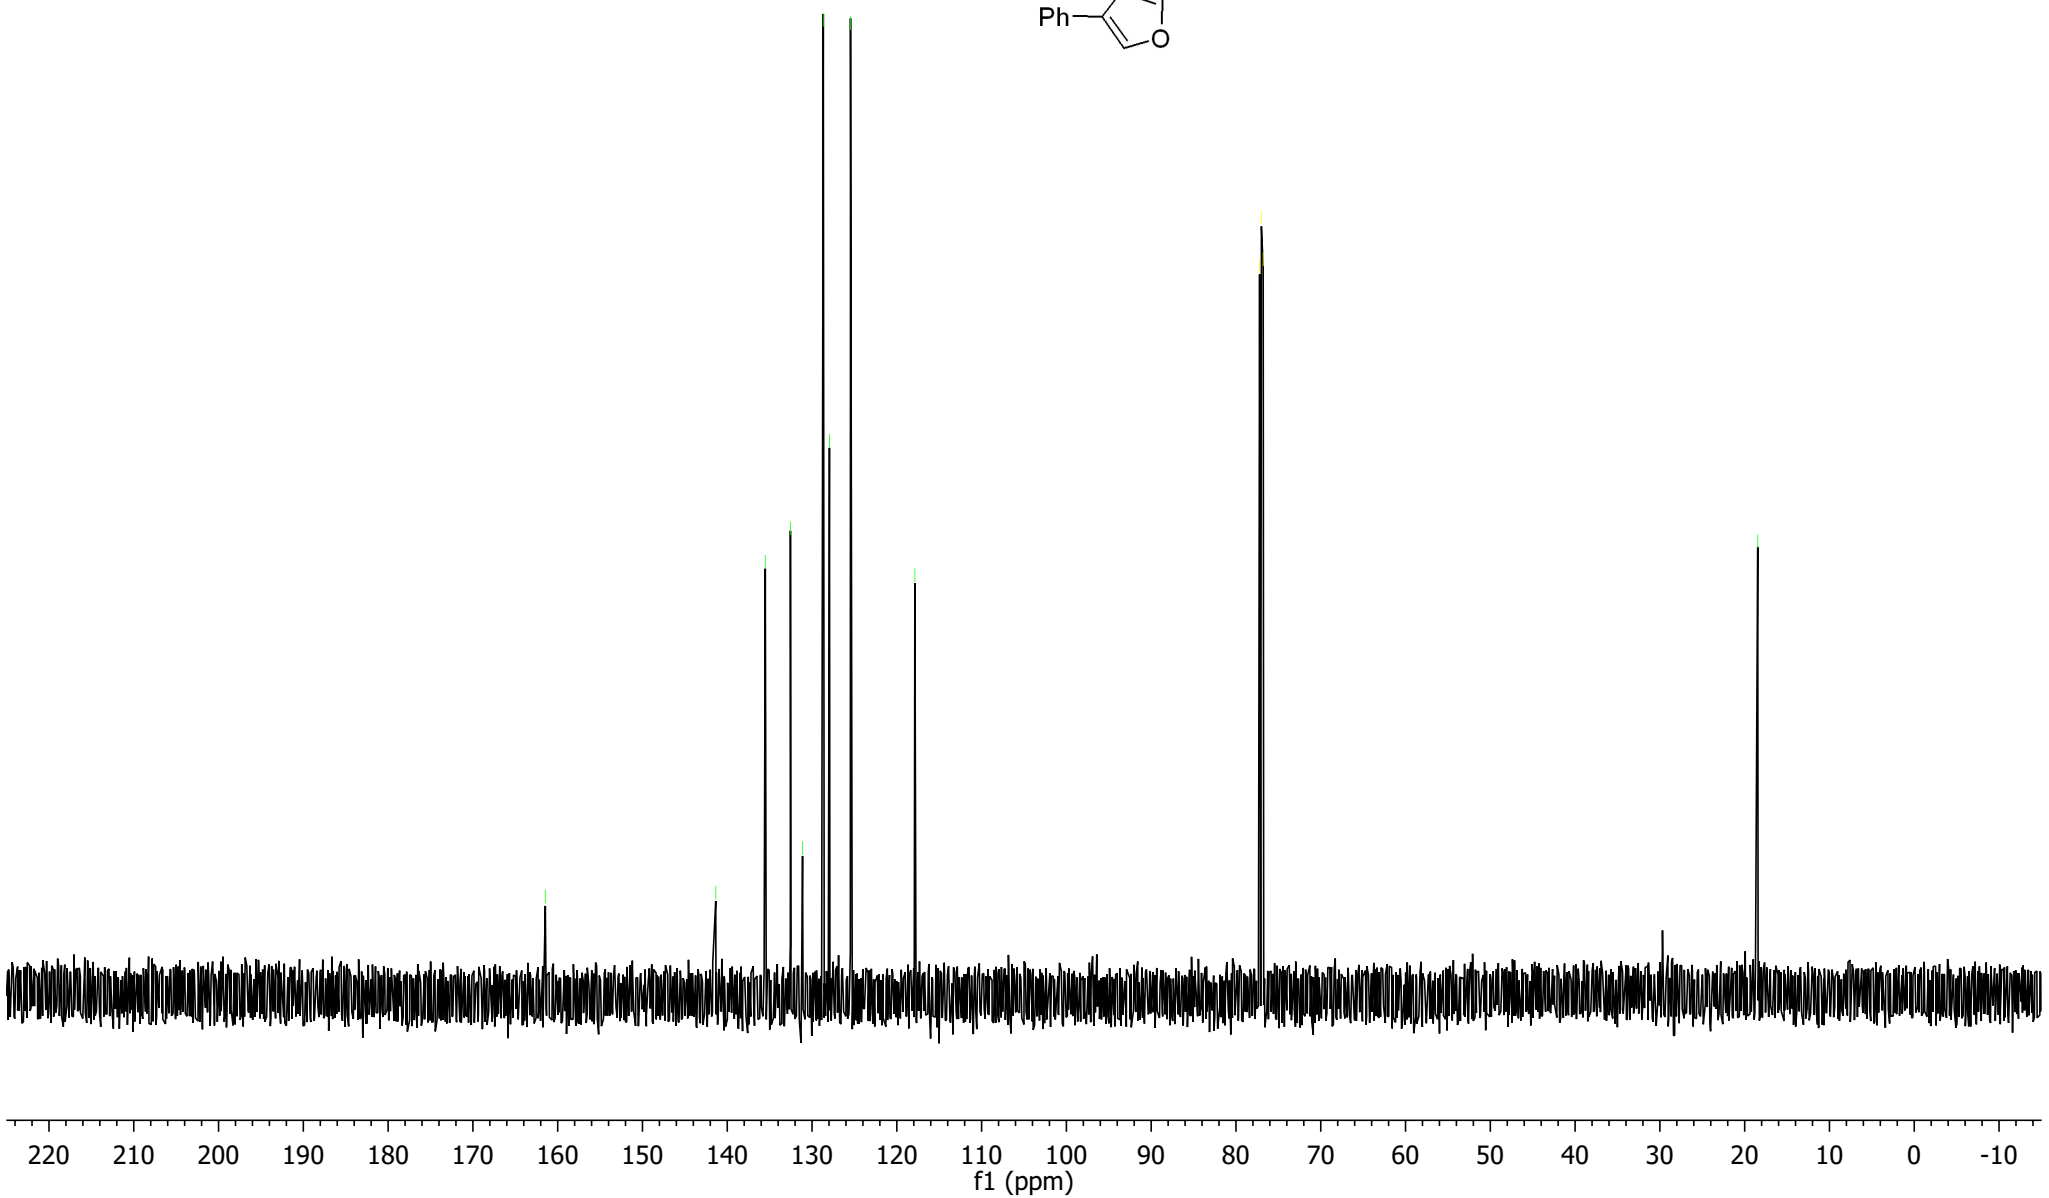

Title jkg-V-26C-H  
Solvent cdcl3  
Spectrometer Frequency 599.64

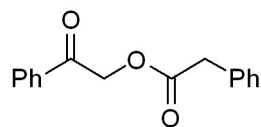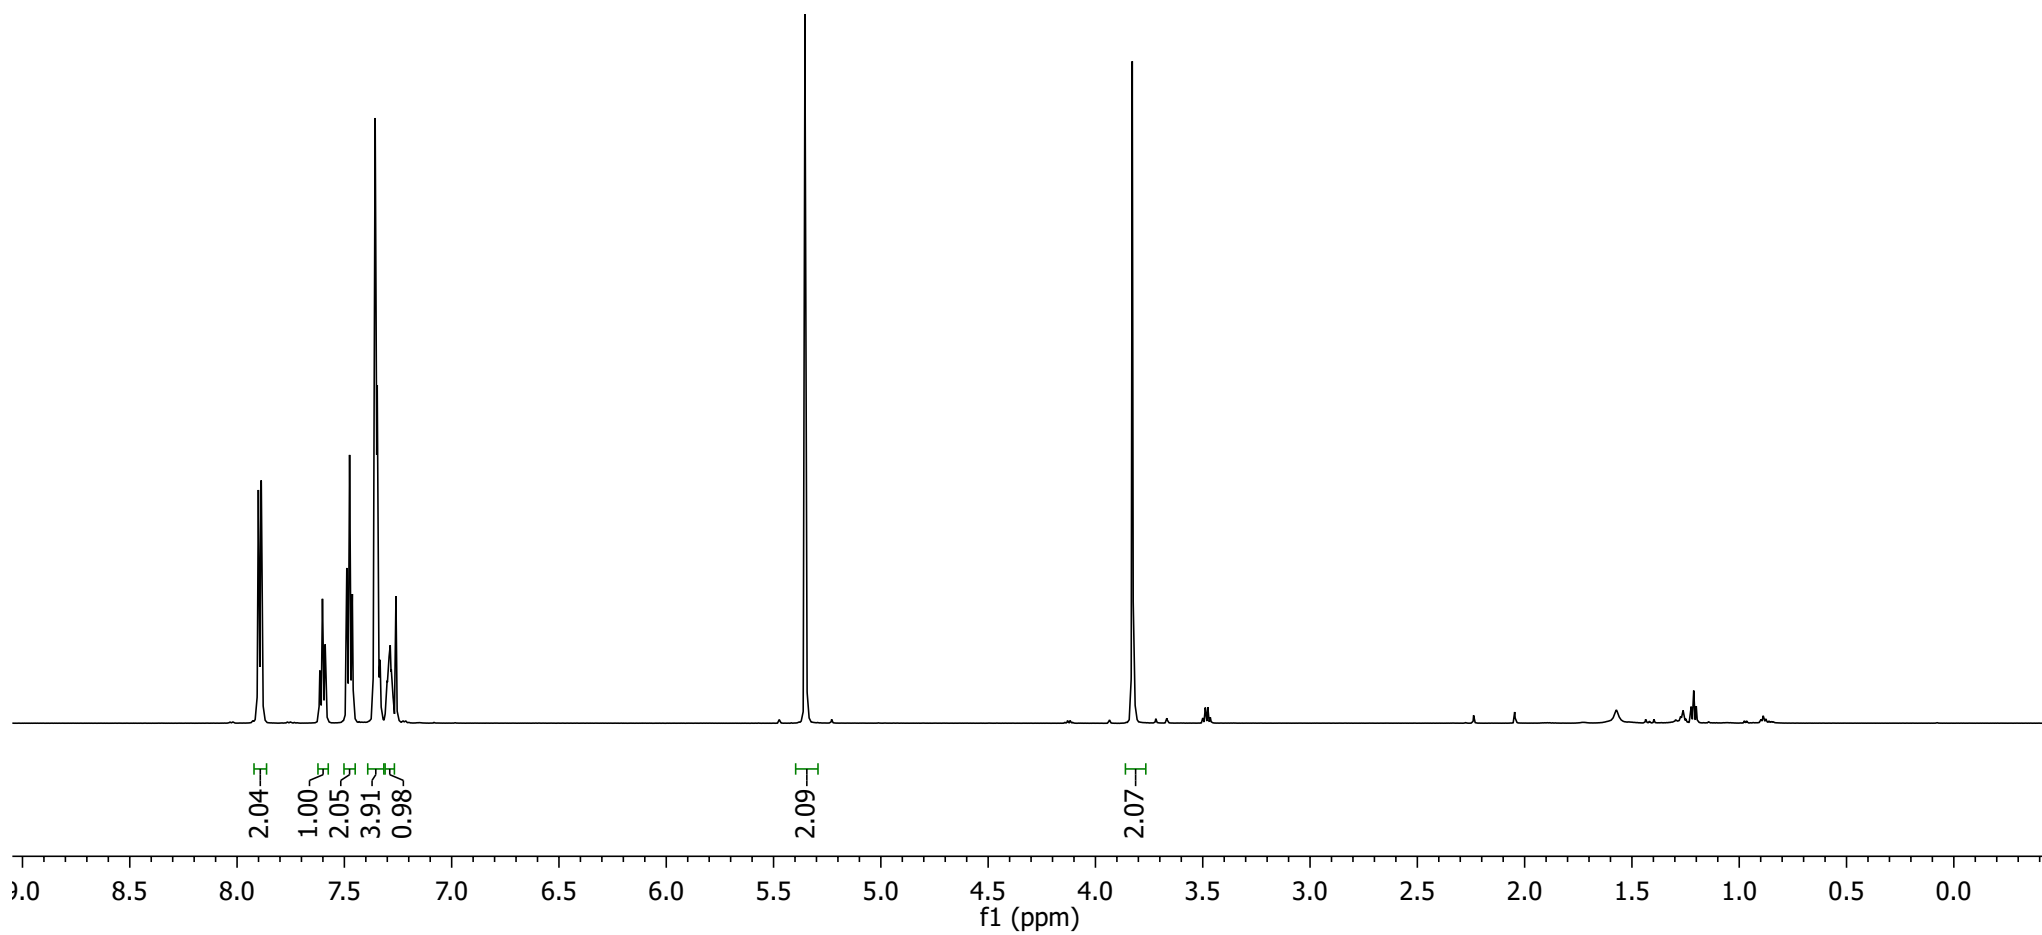

Title jkg-V-26C-C  
Solvent cdcl3  
Spectrometer Frequency 150.79

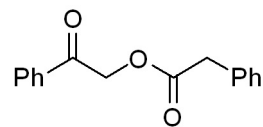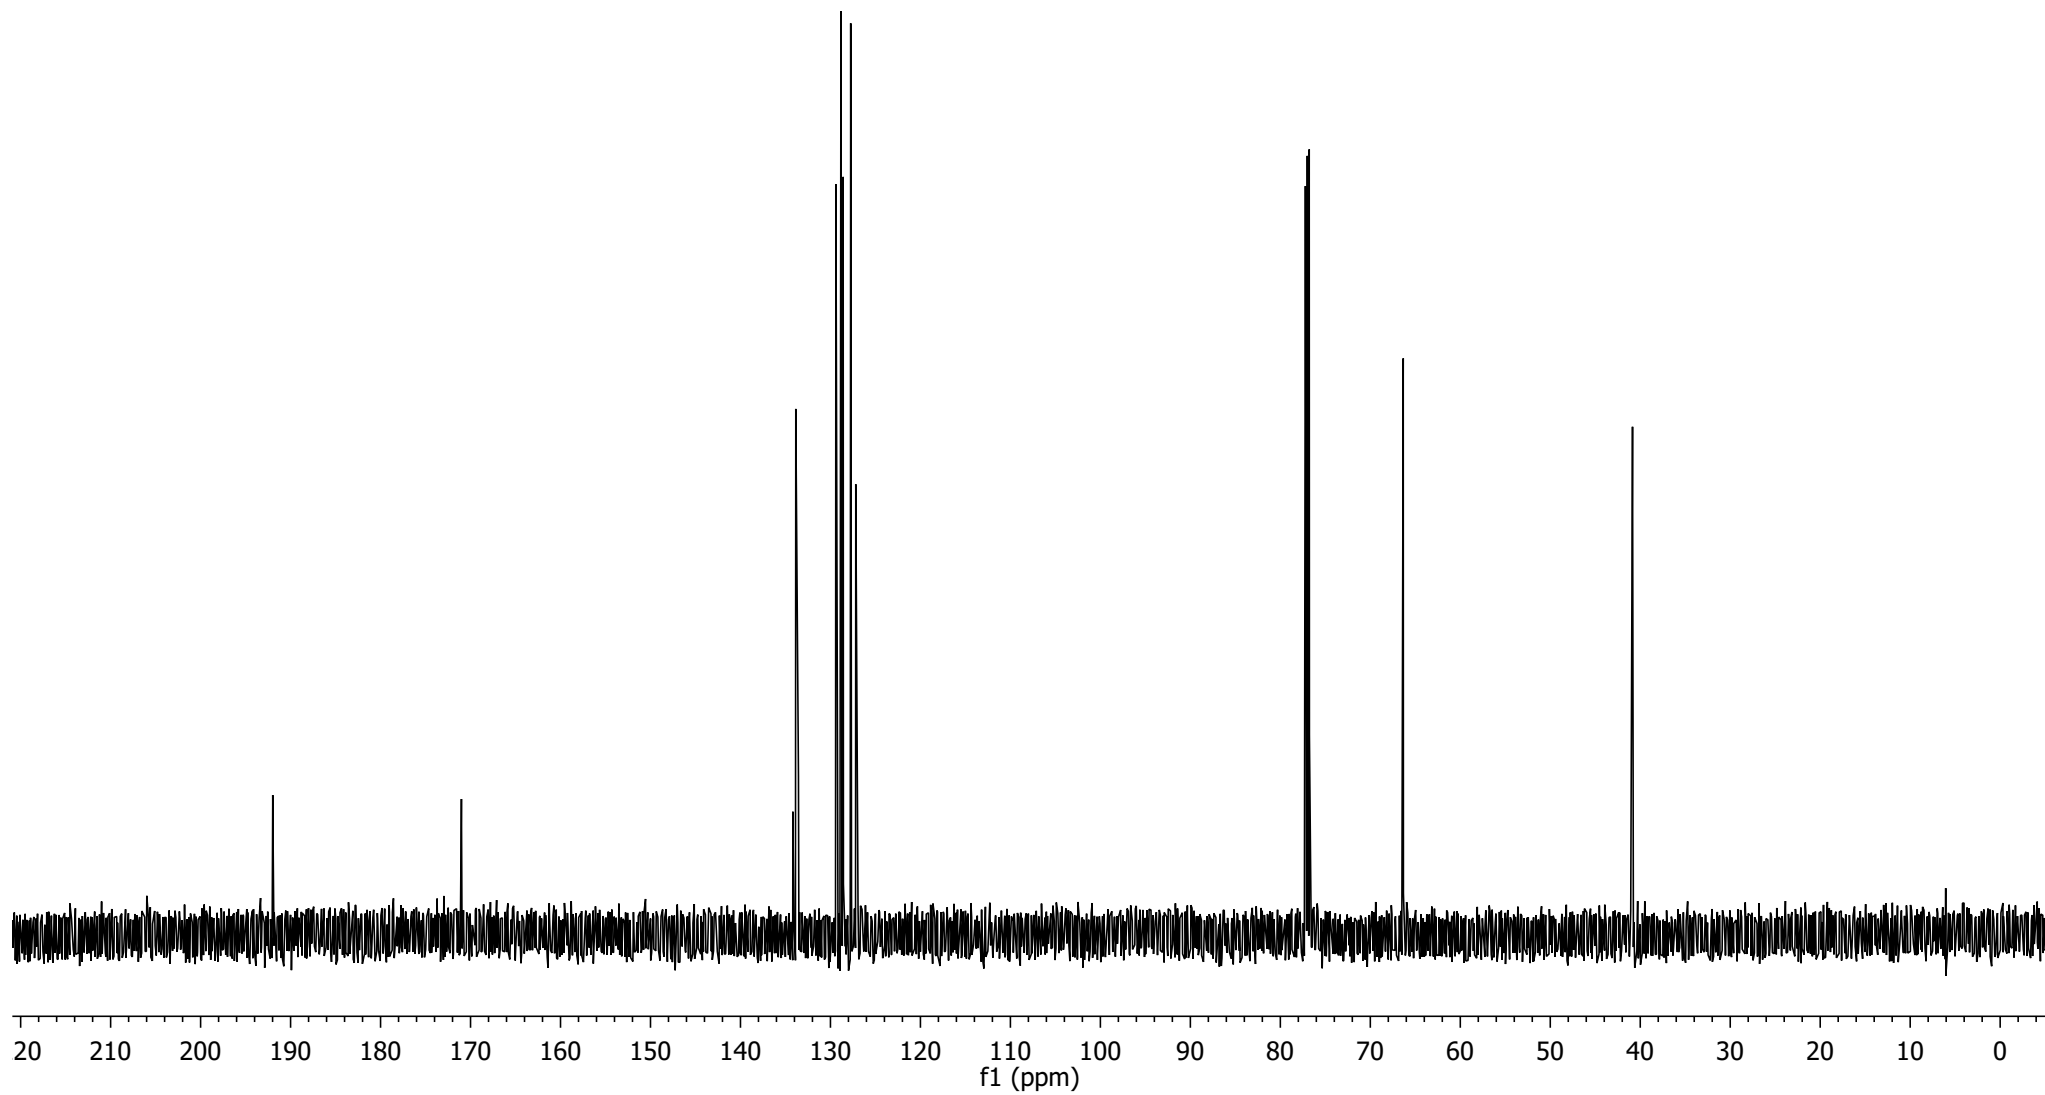

Title jkg-V-36-SM-H  
Solvent cdcl3  
Spectrometer Frequency 599.64

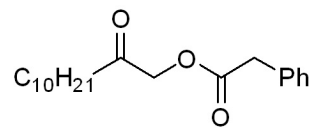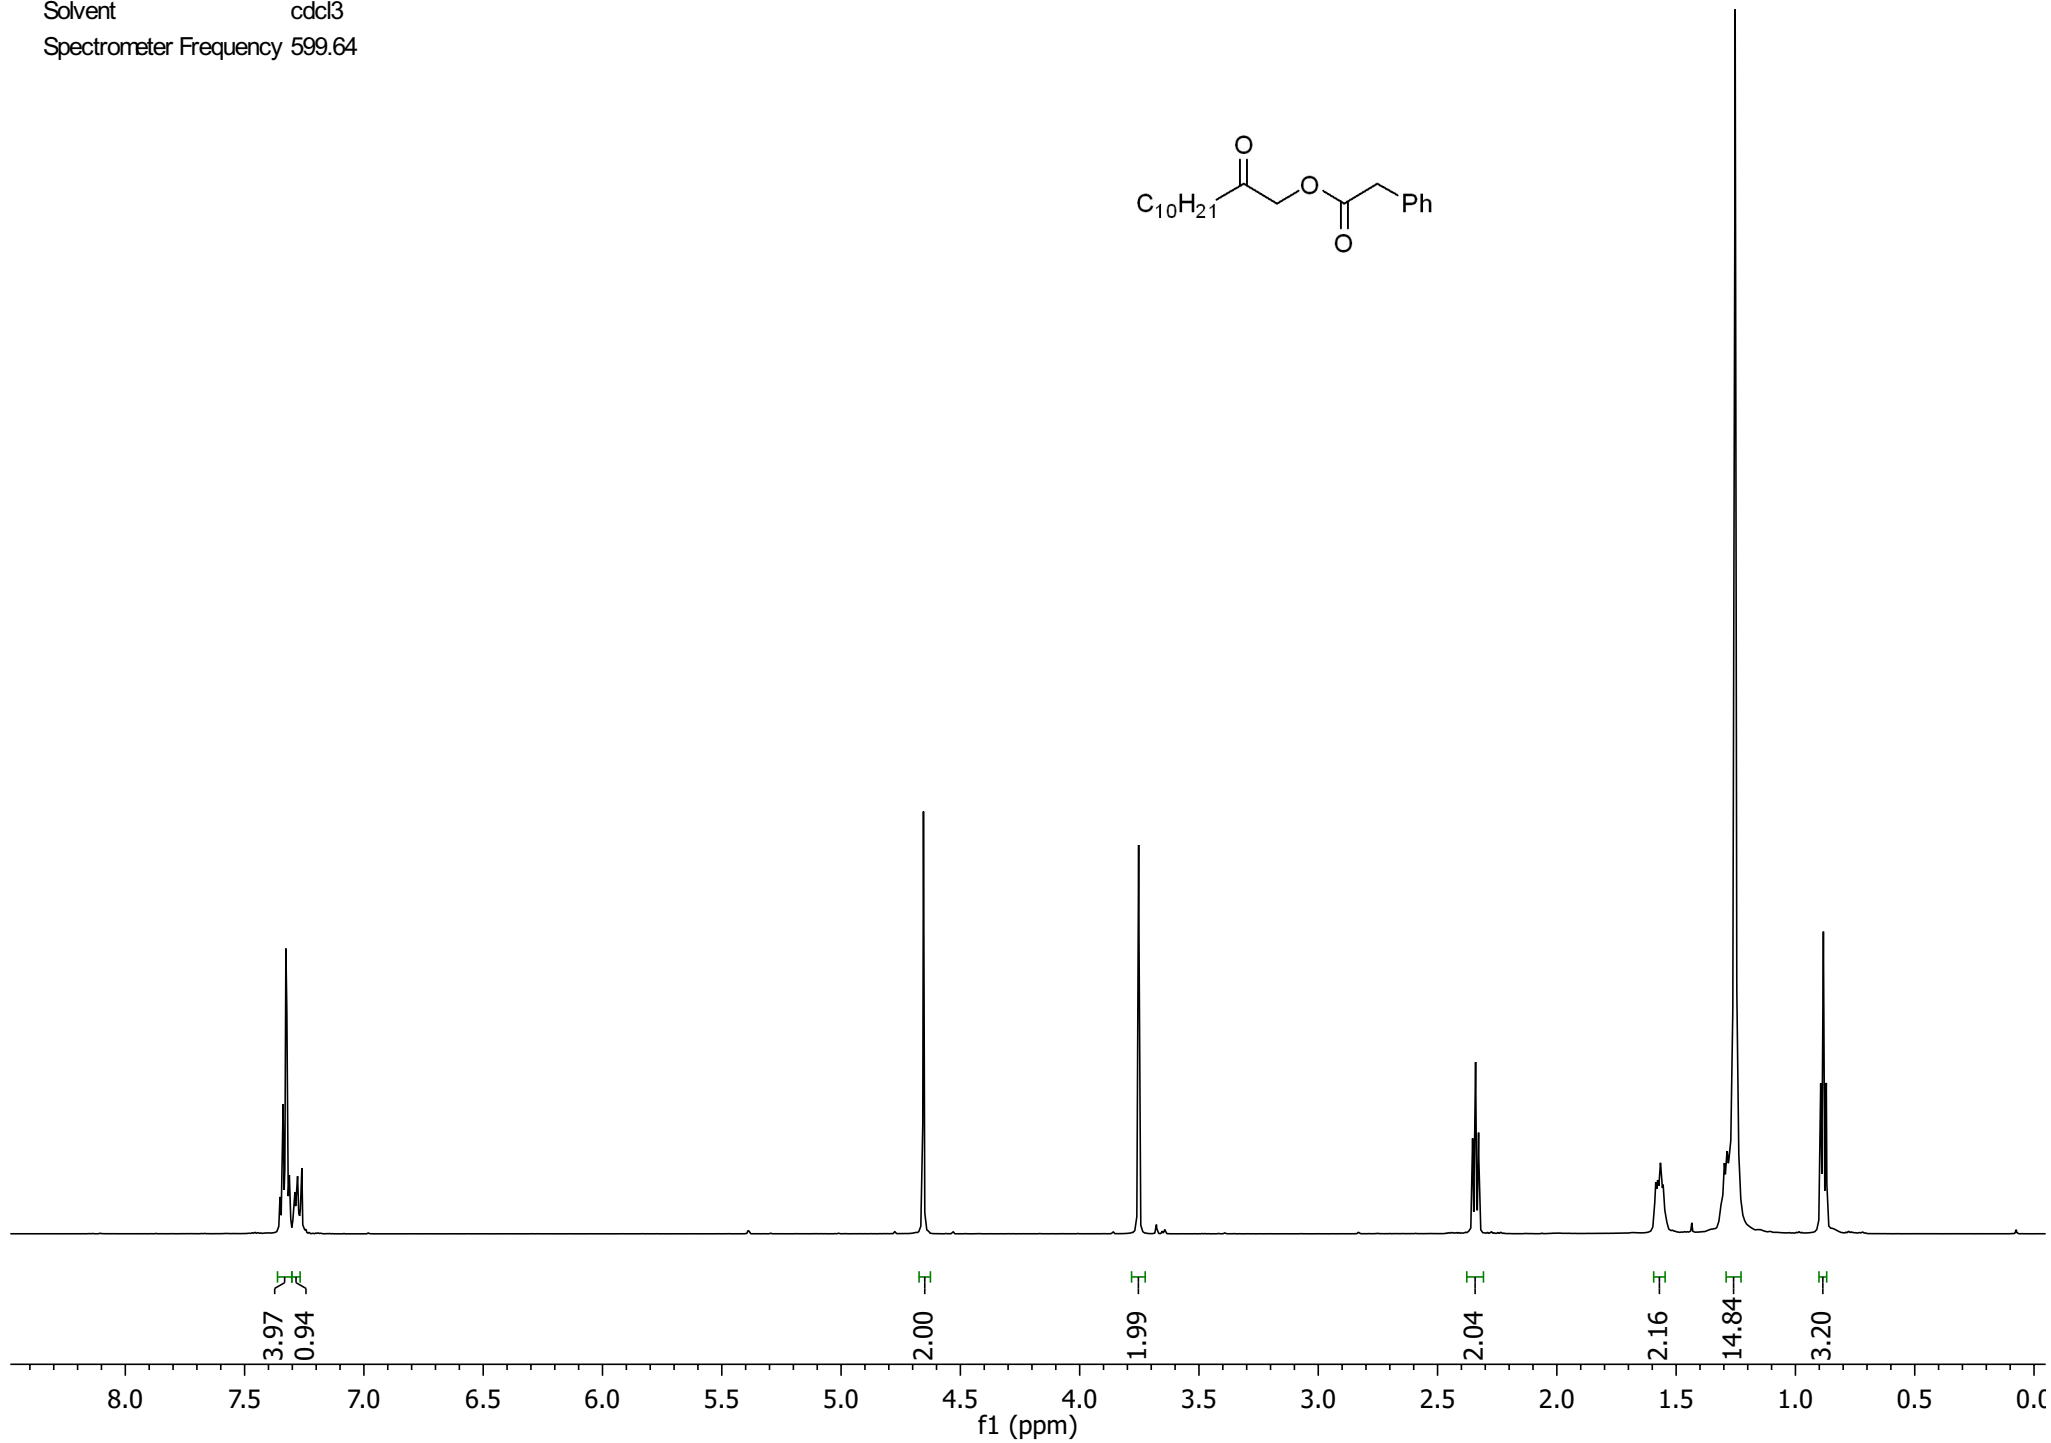

Title jkg-V-36-SM-C  
Solvent ccdl3  
Spectrometer Frequency 150.79

203.96

170.83

133.46  
129.32  
128.60  
127.23

77.21 ccdl3  
77.00 ccdl3  
76.79 ccdl3

68.23

40.85  
38.79

29.52  
29.27  
23.21  
22.65

14.09

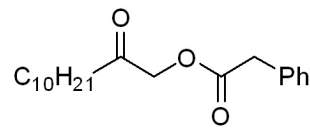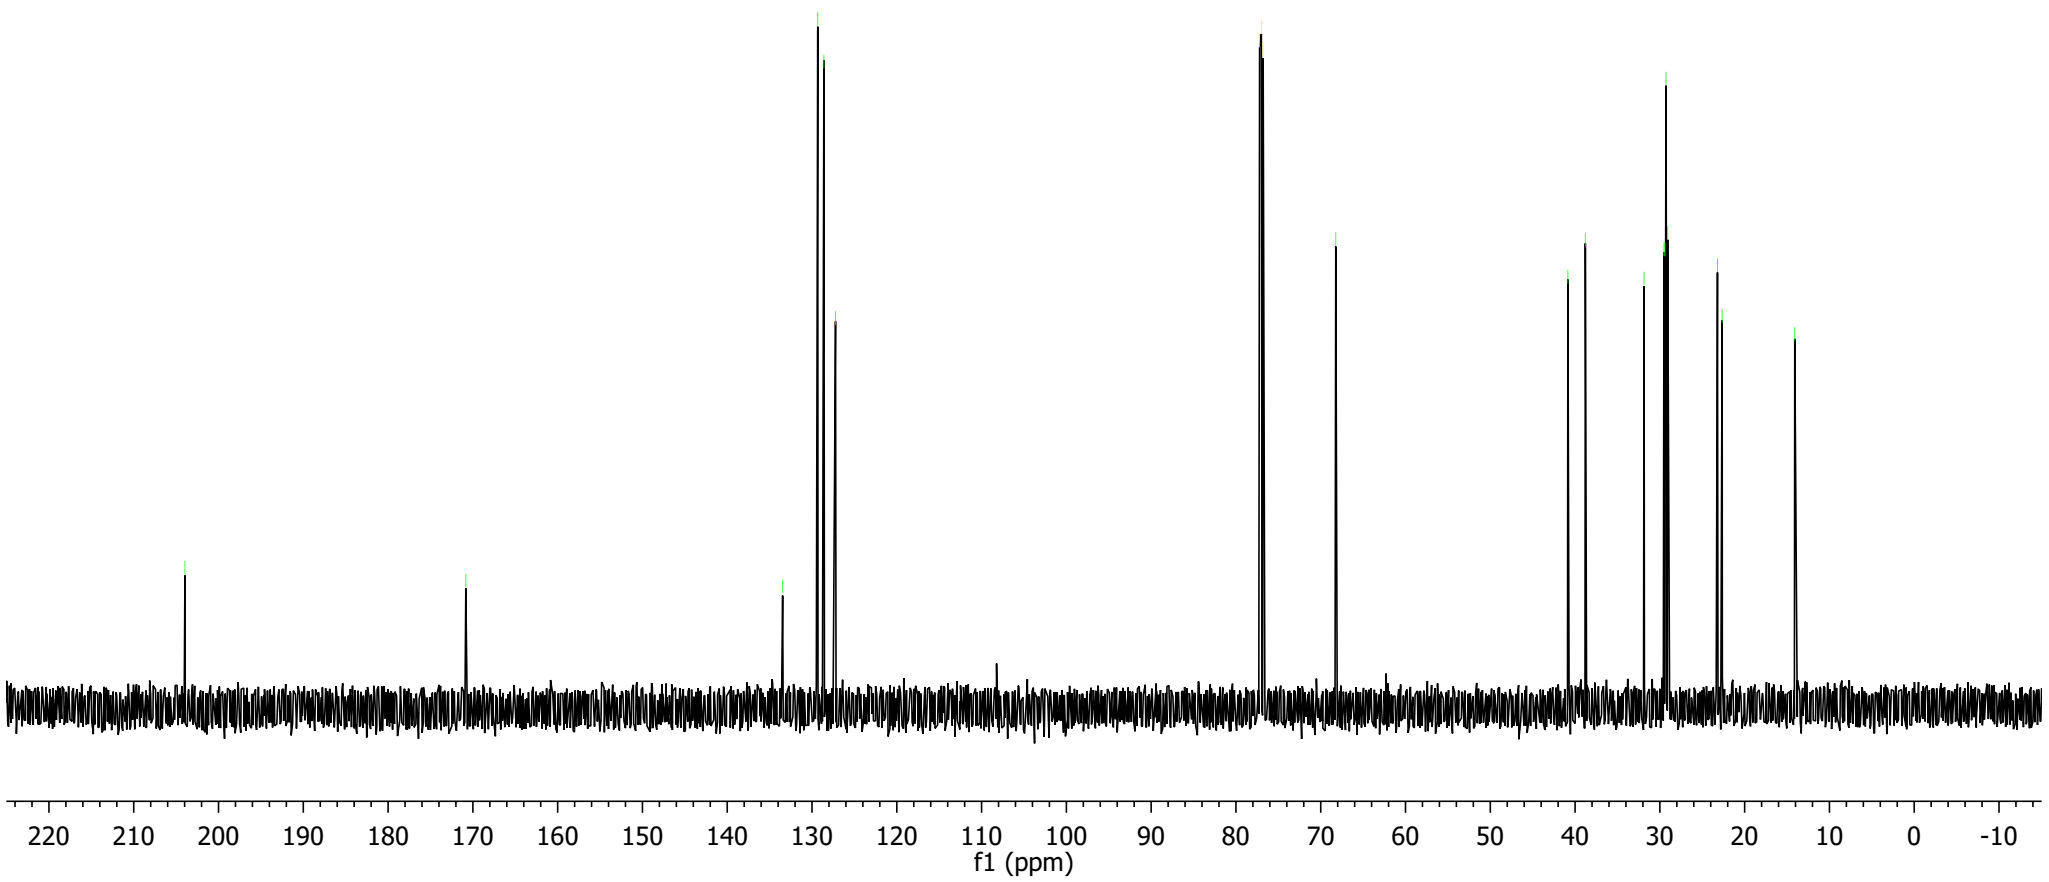

Title jkg-V-30-P-H  
Solvent cdcl3  
Spectrometer Frequency 599.64

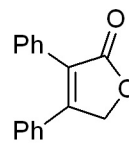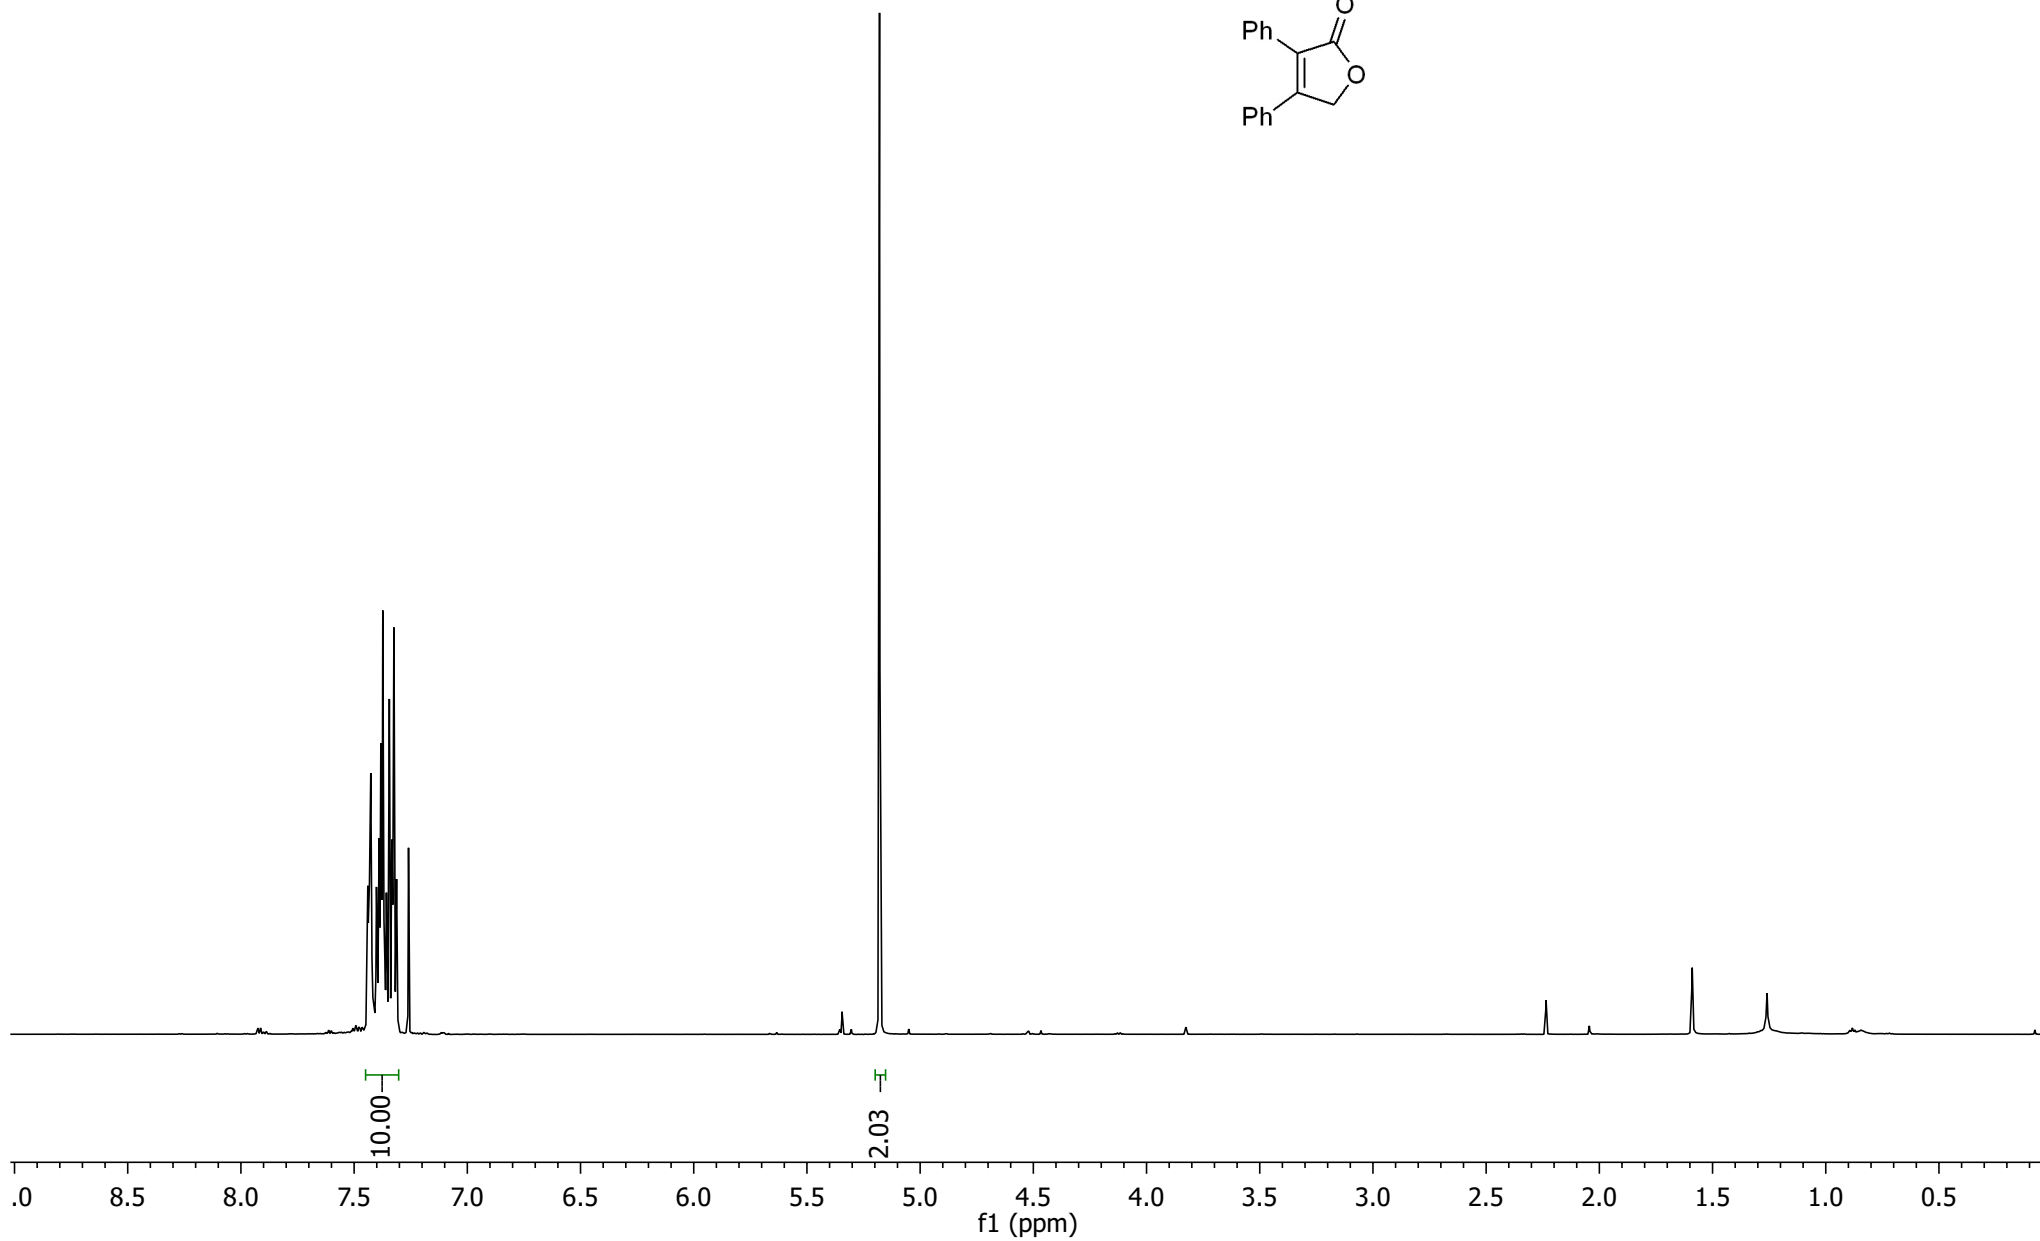



Title jkg-V-30-P-C  
Solvent ccdl3  
Spectrometer Frequency 150.79

173.40

156.05

130.83  
130.57  
130.13  
129.24  
128.98  
128.78  
128.66  
127.46  
126.17

77.21 ccdl3  
77.00 ccdl3  
76.79 ccdl3  
70.55

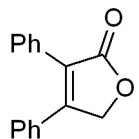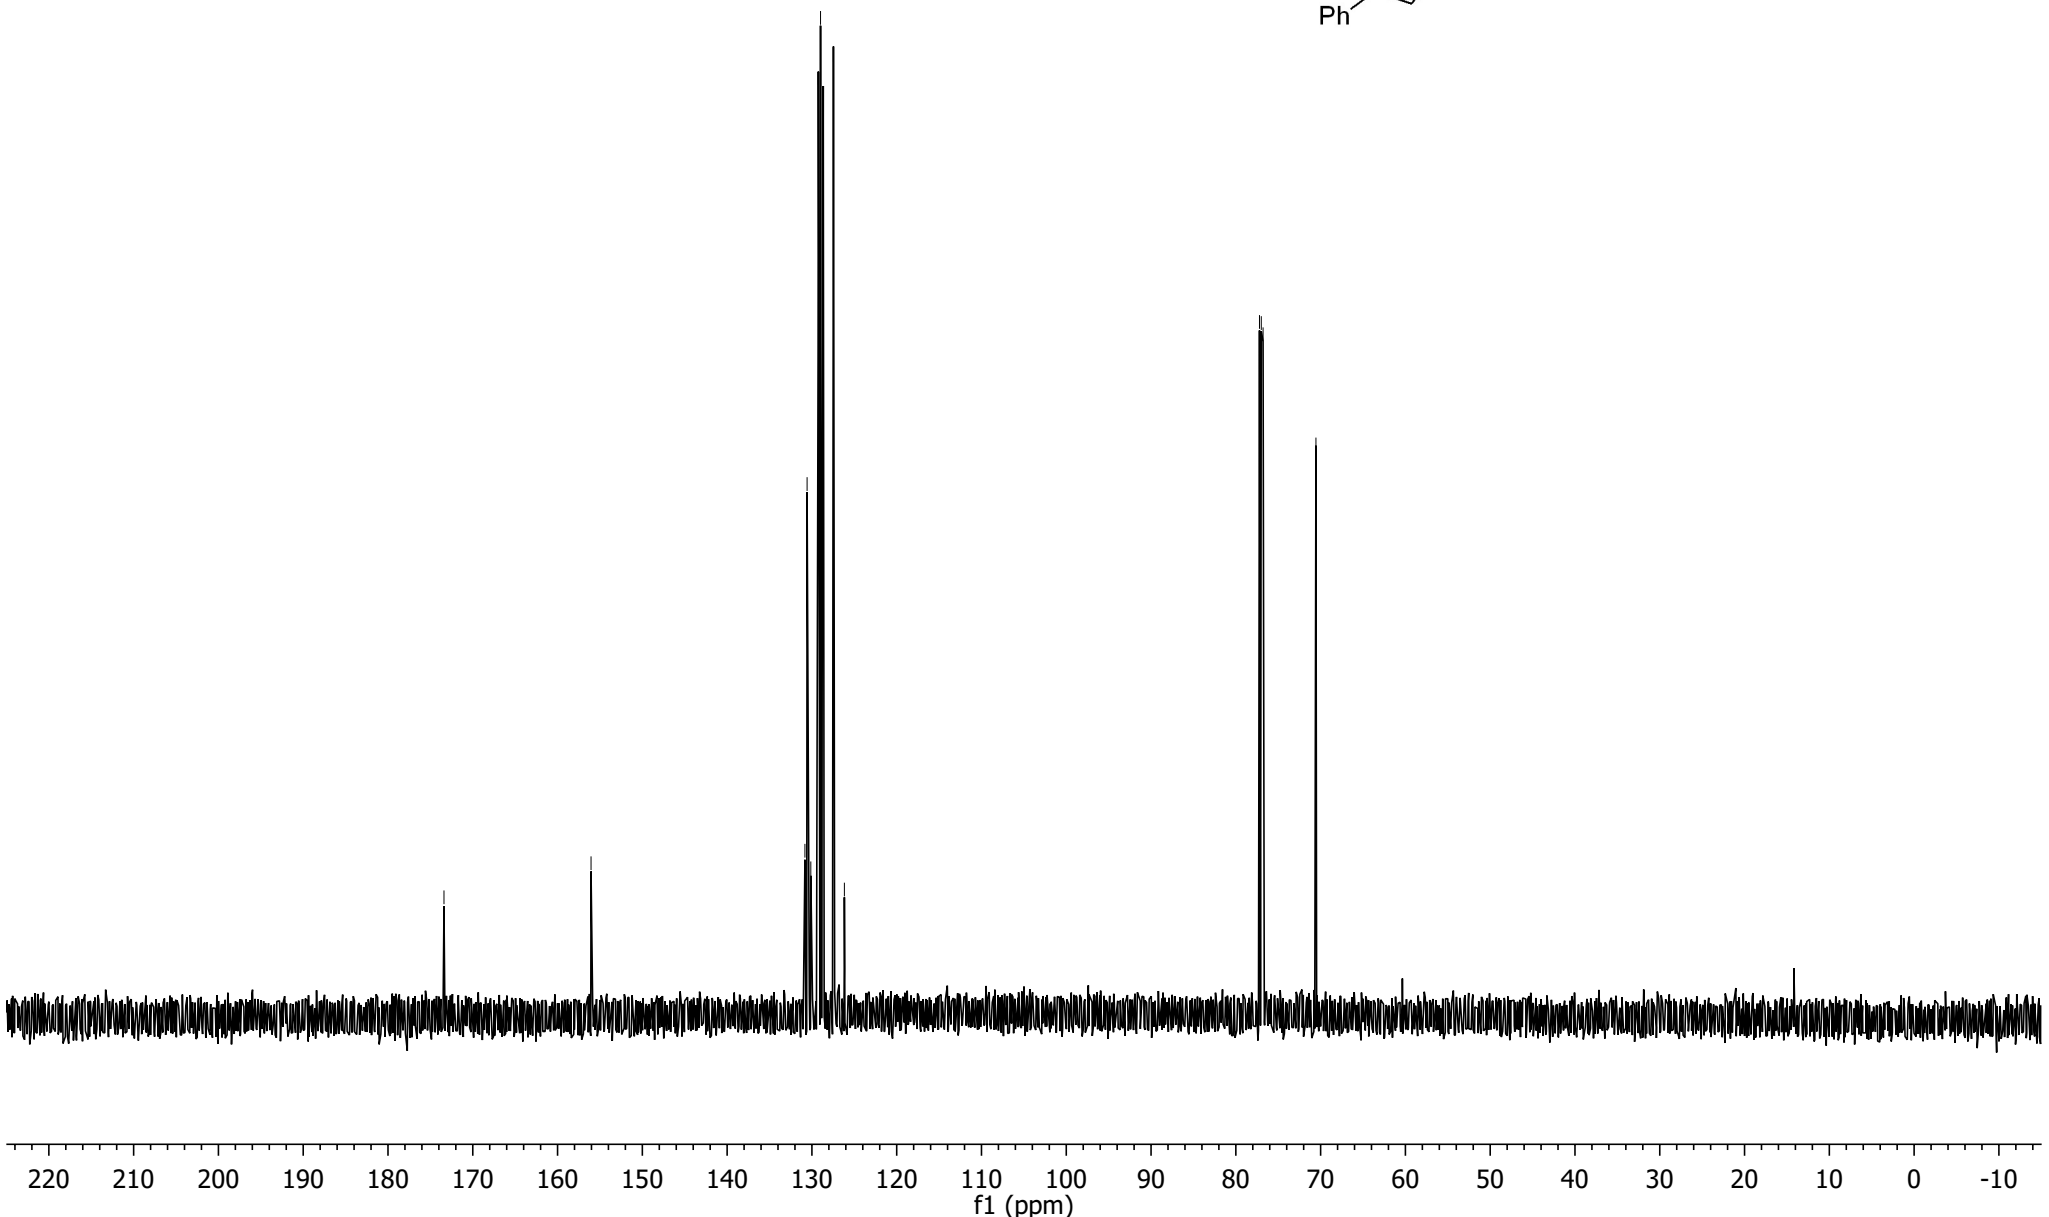

Title jkg-V-36C-H  
Solvent CDCl3  
Spectrometer Frequency 499.86

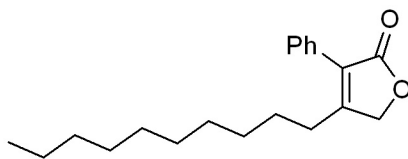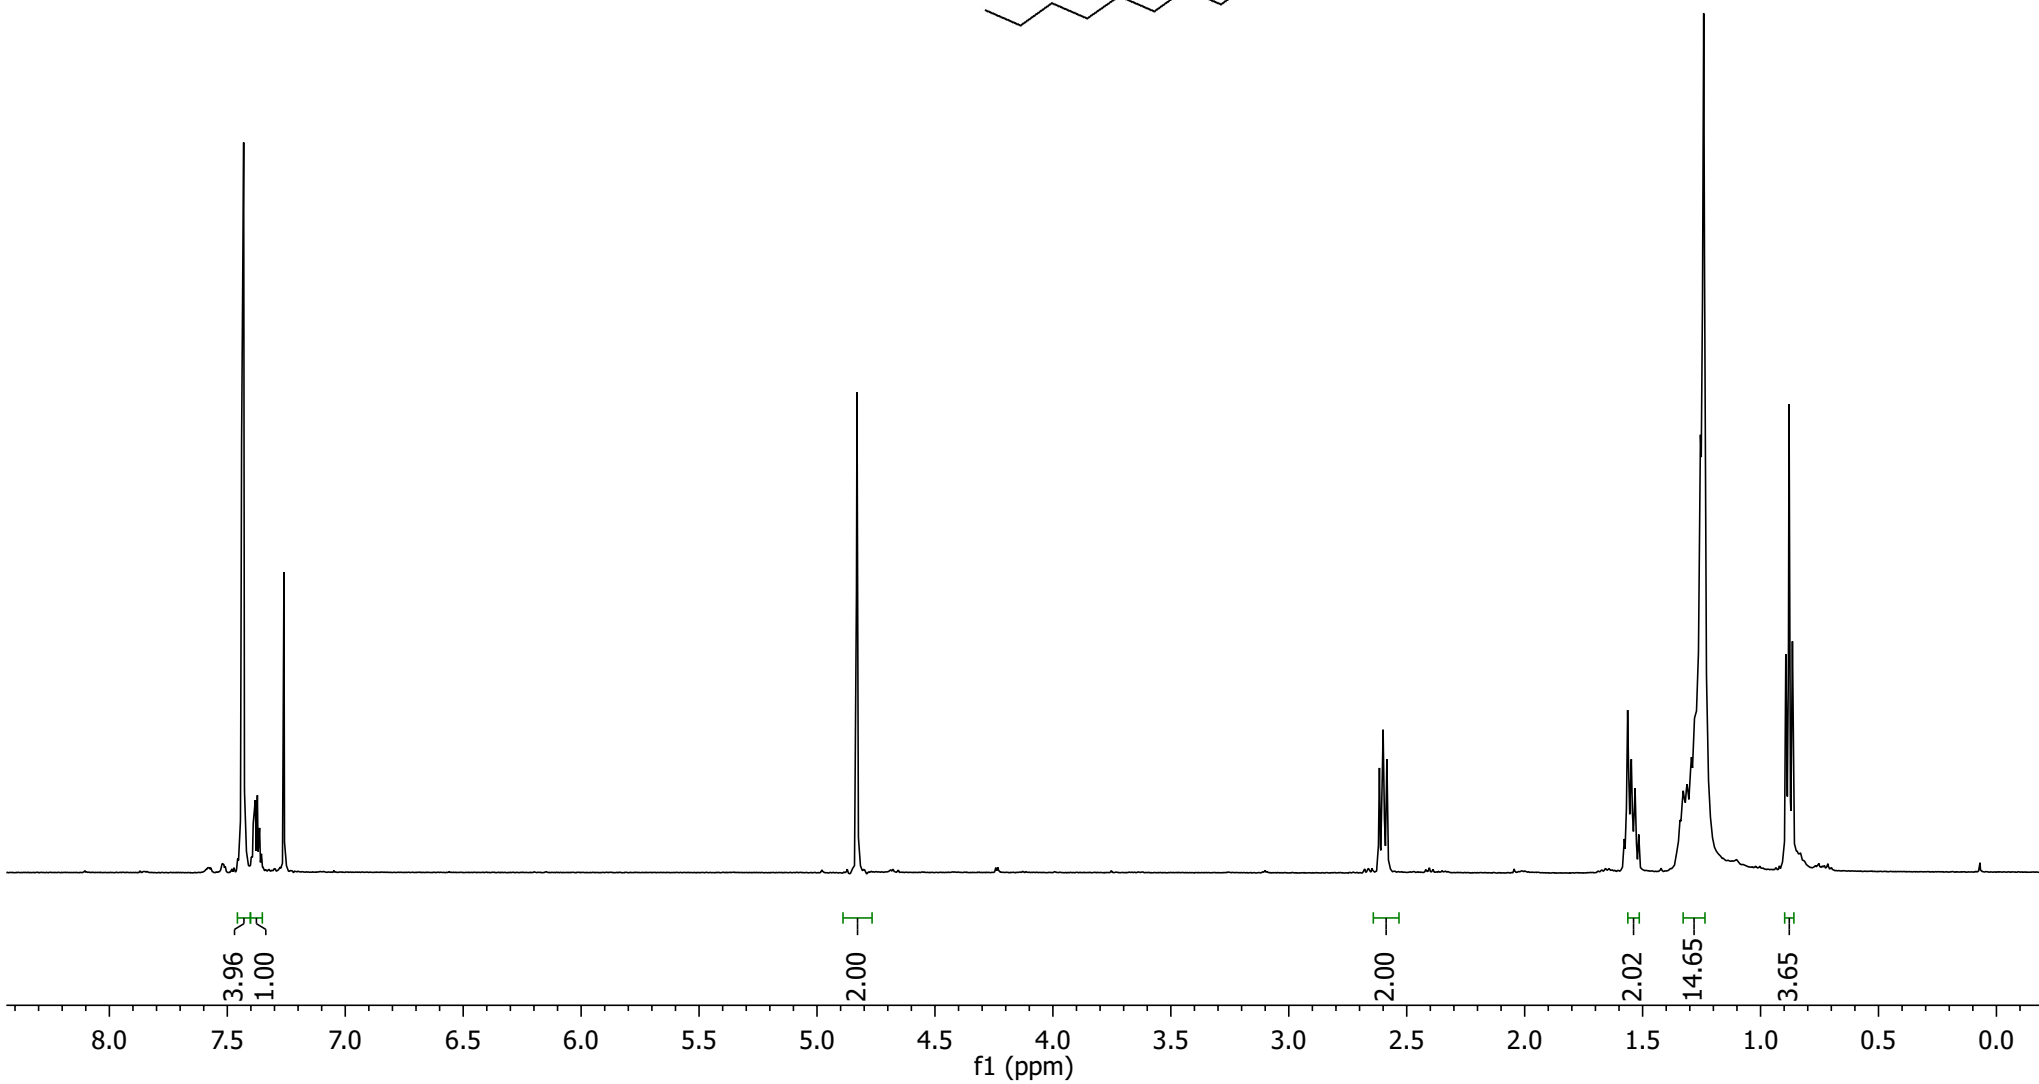

Title jkg-V-36C-C  
Solvent CDCl3  
Spectrometer Frequency 125.70

173.53

162.19

130.03  
128.86  
128.51  
128.41  
126.57

71.14

31.84  
29.70  
29.54  
29.49  
29.40  
29.25  
29.16  
27.91  
27.72  
22.65  
14.09

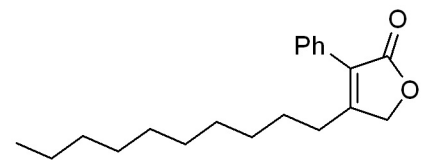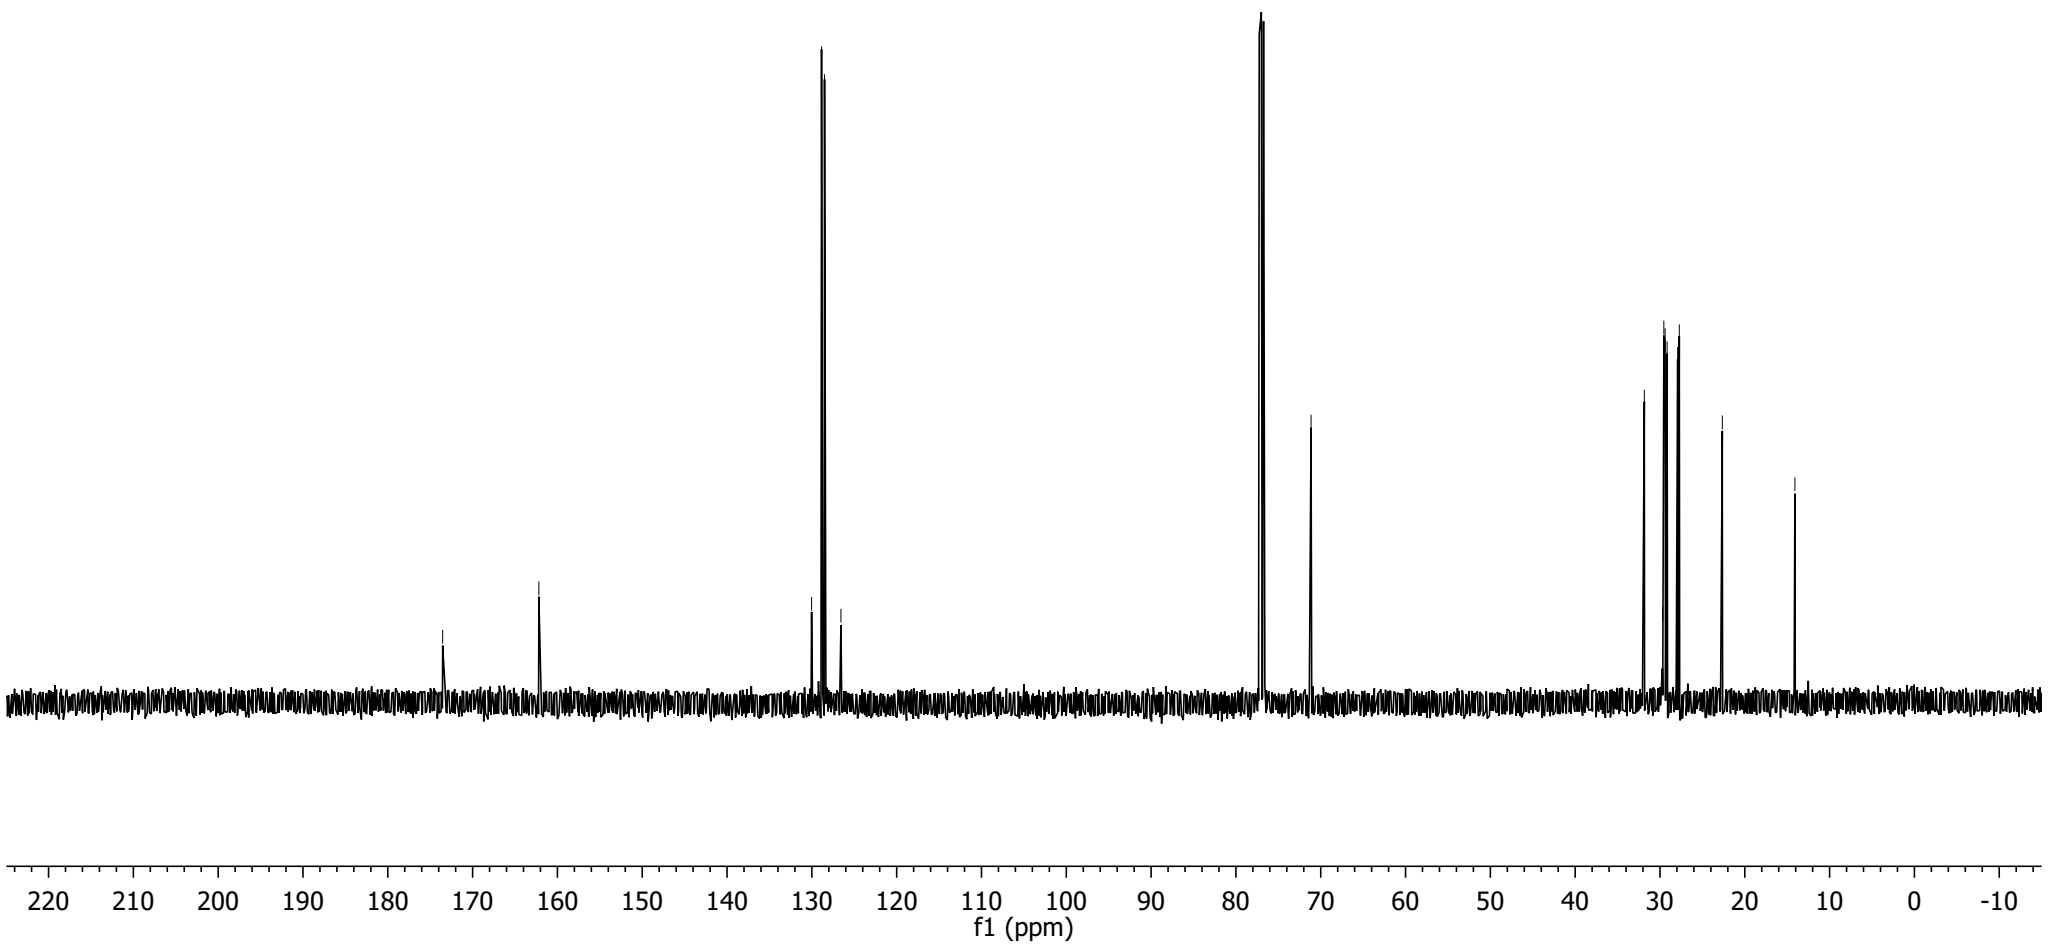

Supplement: NIHMS488994-supplement-SI.pdf [file NIHMS488994-supplement-SI.pdf]
